# Supplementary material
Source: PubMed Central journal article supplement (PMC2689771)
Supplement: M800454-MCP200_1.pdf [file M800454-MCP200_1.pdf]

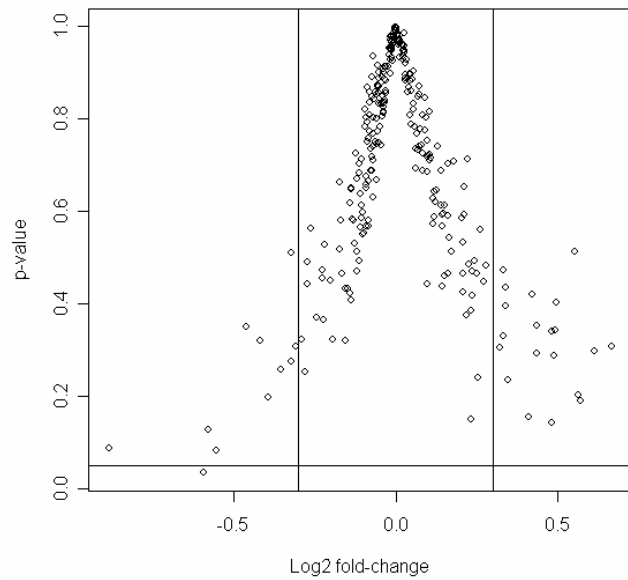

**SUPPLEMENTARY FIGURE 1.** The distribution of p-values when comparing one group of reference samples against another (n=4 in each group).

To monitor the technical variation we included a reference sample (pooled material from all samples) that we analyzed repeatedly throughout the analysis. The eight reference samples were divided into two groups and Fs statistics were performed in the same way as between treatment groups. Among the 283 detected peaks there was only one that displayed significant regulation between the two groups ( $p < 0.05$ ). This peak was of, so far, unknown origin.
