# Supplementary material
Source: PubMed Central journal article supplement (PMC2689771)
Supplement: M800454-MCP200_2.pdf [file M800454-MCP200_2.pdf]

SUPPLEMENTARY TABLE

| UniProt       | Protein name       | Peptide name                        | N-term - C-term cleavage sites | Sequence                                                      | Theoretical Mass (m+h) |
|---------------|--------------------|-------------------------------------|--------------------------------|---------------------------------------------------------------|------------------------|
| <b>P22005</b> | <b>PENK_MOUSE</b>  |                                     |                                |                                                               |                        |
|               |                    | PENK_MOUSE 87-97                    | <b>KD-KK</b>                   | <sup>87</sup> SSKQDESHLLA <sup>97</sup>                       | 1214,601               |
|               |                    | PENK_MOUSE 171-184                  | <b>KD - SKR</b>                | <sup>171</sup> SHQQESTNNDSDMS <sup>184</sup>                  | 1621,603               |
|               |                    | Met-enkephalin-Arg-Ser-Leu          | <b>KR - KR</b>                 | <sup>186</sup> YGGFM <sup>195</sup> RSL                       | 930,45                 |
|               |                    | Oxidated Met-enkephalin-Arg-Ser-Leu | <b>KR - KR</b>                 | <sup>188</sup> YGGFM(ox) <sup>195</sup> RSL                   | 946,445                |
|               |                    | PENK_MOUSE 198-209                  | <b>KR - KR</b>                 | <sup>198</sup> SPQLEDEAKELQ <sup>209</sup>                    | 1386,675               |
|               |                    | PENK_MOUSE 198-208                  | <b>KR - QKR</b>                | <sup>196</sup> SPQLEDEAKEL <sup>206</sup>                     | 1258,616               |
|               |                    | PENK_MOUSE 198-207                  | <b>KR - LQKR</b>               | <sup>198</sup> SPQLEDEAKE <sup>207</sup>                      | 1145,532               |
|               |                    | PENK_MOUSE 201-209                  | <b>SPQ - KR</b>                | <sup>201</sup> LEDEAKELQ <sup>209</sup>                       | 1074,531               |
|               |                    | PENK_MOUSE 219-229                  | <b>RR-KR</b>                   | <sup>219</sup> VGRPEW <sup>229</sup> MDYQ                     | 1466,652               |
|               |                    | PENK_MOUSE 239-260                  | <b>KR - KR</b>                 | <sup>239</sup> FAESLPSDEEGENYSKEVPEIE <sup>260</sup>          | 2498,109               |
|               |                    | Phosphorylated PENK_MOUSE 239-260   | <b>KR - KR</b>                 | <sup>239</sup> FAESLPSDEEGENYS(phospho)KEVPEIE <sup>260</sup> | 2578,076               |
|               |                    | Met-enkephalin-Arg-Phe              | <b>KR - C-term</b>             | <sup>263</sup> YGGFMRF <sup>269</sup>                         | 877,403                |
| <b>P16014</b> | <b>SCG1_MOUSE</b>  |                                     |                                |                                                               |                        |
|               |                    | SCG1_MOUSE 64-86                    | <b>KK - RD</b>                 | <sup>64</sup> SGKEVKGEEKGENQNSKFEVRL <sup>86</sup>            | 2605,358               |
|               |                    | Phosphorylated SCG1_MOUSE 186-199   | <b>KK - KR</b>                 | <sup>186</sup> HIEDS(phospho)GKPN <sup>199</sup> TFSN         | 1654,674               |
|               |                    | SCG1_MOUSE 313-330                  | <b>RR-KR</b>                   | <sup>313</sup> PSPKESKEADVATVRLGE <sup>330</sup>              | 1912,997               |
|               |                    | Phosphorylated SCG1_MOUSE 313-330   | <b>RR - KR</b>                 | <sup>313</sup> PSPKES(phospho)KEADVATVRLGE <sup>330</sup>     | 1992,964               |
|               |                    | SCG1_MOUSE 375-383                  | <b>RAPRPR - KR</b>             | <sup>375</sup> SEESQEREY <sup>383</sup>                       | 1156,475               |
|               |                    | Phosphorylated SCG1_MOUSE 375-383   | <b>RAPRPR - KR</b>             | <sup>375</sup> SEES(phospho)QEREY <sup>383</sup>              | 1236,442               |
|               |                    | SCG1_MOUSE 419-435                  | <b>RQHR - KR</b>               | <sup>419</sup> GRGREPGAHSALDTREE <sup>435</sup>               | 1837,89                |
|               |                    | SCG1_MOUSE 438-446                  | <b>KR - RE</b>                 | <sup>438</sup> LLDEGHYPV <sup>446</sup>                       | 1042,52                |
|               |                    | SCG1_MOUSE 438-454                  | <b>KR - KR</b>                 | <sup>438</sup> LLDEGHYPVRESPIDTA <sup>454</sup>               | 1911,945               |
|               |                    | SCG1_MOUSE 457-466                  | <b>KR - KN</b>                 | <sup>457</sup> YPQSKWQE <sup>466</sup>                        | 1322,601               |
|               |                    | SCG1_MOUSE 588-597                  | <b>KR - KR</b>                 | <sup>588</sup> SFARAPQLDL <sup>597</sup>                      | 1117,6                 |
|               |                    | SCG1_MOUSE 600-613                  | <b>KR - RKK</b>                | <sup>600</sup> QYDGV <sup>613</sup> AELDQLLHY                 | 1663,796               |
|               |                    | SCG1_MOUSE 667-675                  | <b>EL - RG</b>                 | <sup>667</sup> Pyro-Glu(Q)KIAEKFSQ <sup>675</sup>             | 1061,563               |
| <b>P60041</b> | <b>SMS_MOUSE</b>   |                                     |                                |                                                               |                        |
|               |                    | SMS_MOUSE 87-100                    | <b>EL - RK</b>                 | <sup>87</sup> Pyro-Glu(Q)RSANSNPAMAPRE <sup>100</sup>         | 1511,702               |
|               |                    | Somatostatin-28 (1-12)              | <b>RLELQR - RK</b>             | <sup>89</sup> SANSNPAMAPRE <sup>100</sup>                     | 1244,569               |
|               |                    | Oxidated Somatostatin-28 (1-12)     | <b>RLELQR - RK</b>             | <sup>89</sup> SANSNPAM(ox)APRE <sup>100</sup>                 | 1260,564               |
|               |                    | SMS_MOUSE 89-99                     | <b>RLELQR - ERK</b>            | <sup>89</sup> SANSNPAMAPR <sup>99</sup>                       | 1115,526               |
|               |                    | SMS_MOUSE 91-100                    | <b>RLELQRSA - RK</b>           | <sup>91</sup> NSNPAMAPRE <sup>100</sup>                       | 1086,5                 |
|               |                    | SMS_MOUSE 92-100                    | <b>RLELQRSAN - R</b>           | <sup>92</sup> SNPAMAPRE <sup>100</sup>                        | 972,457                |
| <b>Q9QXV0</b> | <b>PCSK1_MOUSE</b> |                                     |                                |                                                               |                        |
|               |                    | Little SAAS                         | <b>KEPR - RR</b>               | <sup>42</sup> SLSAASAPLVETSTPLRL <sup>59</sup>                | 1813,007               |

|               |                    |                                       |             |                                                       |          |
|---------------|--------------------|---------------------------------------|-------------|-------------------------------------------------------|----------|
|               |                    | PCSK1_MOUSE 42-57                     | KEPR - RLRR | <sup>42</sup> SLAASAPLVETSTPL <sup>57</sup>           | 1543,821 |
|               |                    | PCSK1_MOUSE 46-59                     | SLSA - RR   | <sup>46</sup> ASAPLVETSTPLRL <sup>59</sup>            | 1454,821 |
|               |                    | Little LEN                            | KR - RR     | <sup>243</sup> LENPSPQAPA <sup>252</sup>              | 1023,511 |
| <b>P41539</b> | <b>TKN1_MOUSE</b>  |                                       |             |                                                       |          |
|               |                    | Substance P                           | RIAR - GKR  | <sup>58</sup> RPKPQQFFGLM-C-amide <sup>68</sup>       | 1347,735 |
|               |                    | TKN1_MOUSE 72-95                      | KR - KR     | <sup>72</sup> DADSSVEKQVALLKALYGHGQISH <sup>95</sup>  | 2566,326 |
|               |                    | TKN1_MOUSE 72-94                      | KR - HKR    | <sup>72</sup> DADSSVEKQVALLKALYGHGQIS <sup>94</sup>   | 2429,267 |
|               |                    | Neurokinin A                          | KR - GKR    | <sup>98</sup> HKTDSFVGLM-C-amide <sup>107</sup>       | 1133,577 |
|               |                    | Oxidated Neurokinin A                 | KR - GKR    | <sup>98</sup> HKTDSFVGLM(ox) C-amide <sup>107</sup>   | 1149,572 |
|               |                    | C-terminal-flanking peptide           | KR - RR     | <sup>111</sup> ALNSVAYERSAMQNYE <sup>126</sup>        | 1845,844 |
| <b>P26339</b> | <b>CMGA_MOUSE</b>  |                                       |             |                                                       |          |
|               |                    | CMGA_MOUSE 374-390                    | KR - RAYGFR | <sup>374</sup> LEGEDDPDRSMKLSFR <sup>390</sup>        | 1995,944 |
|               |                    | WE-14                                 | KR - KR     | <sup>358</sup> WSRMDQLAKELTAE <sup>371</sup>          | 1677,826 |
|               |                    | CMGA_MOUSE 358-370                    | KR - EKR    | <sup>358</sup> WSRMDQLAKELTA <sup>370</sup>           | 1548,784 |
|               |                    | CMGA_MOUSE 361-371                    | RWSR - KR   | <sup>361</sup> MDQLAKELTAE <sup>371</sup>             | 1248,614 |
|               |                    | CMGA_MOUSE 392-402                    | RTR - RR    | <sup>392</sup> AYGFRDPGPQL <sup>402</sup>             | 1220,606 |
| <b>O35417</b> | <b>PDYN_MOUSE</b>  |                                       |             |                                                       |          |
|               |                    | PDYN_MOUSE 177-199                    | KR - KR     | <sup>177</sup> SSEMARDEDGGQDGDQVGHEDLY <sup>199</sup> | 2510,001 |
|               |                    | PDYN_MOUSE 211-218                    | RRIR - KR   | <sup>211</sup> PKLKWDNQ <sup>218</sup>                | 1028,552 |
|               |                    | PDYN_MOUSE 235-248                    | TR - C-term | <sup>235</sup> SQENPNTYSEDLDV <sup>248</sup>          | 1610,682 |
| <b>P21661</b> | <b>NEC2_MOUSE</b>  |                                       |             |                                                       |          |
|               |                    | NEC2_MOUSE 94-104                     | RDPR - RK   | <sup>94</sup> IKMALQQEGFD <sup>104</sup>              | 1279,635 |
| <b>Q9R171</b> | <b>CBLN1_MOUSE</b> |                                       |             |                                                       |          |
|               |                    | Cerebellin                            | VR - EP     | <sup>57</sup> SGSAKVAFSAIRSTNH <sup>72</sup>          | 1632,845 |
|               |                    | CBLN1_MOUSE 57-71                     | VR - HEP    | <sup>57</sup> SGSAKVAFSAIRSTN <sup>71</sup>           | 1495,786 |
| <b>P70296</b> | <b>PEBP_MOUSE</b>  |                                       |             |                                                       |          |
|               |                    | PEBP1_MOUSE 30-46                     | DY - MN     | <sup>30</sup> AGVTVDELGKVLTPQV <sup>46</sup>          | 1726,959 |
|               |                    | PEBP1_MOUSE 37-45                     | EL-MN       | <sup>37</sup> GKVLTPQV <sup>45</sup>                  | 942,562  |
| <b>Q8BGU2</b> | <b>CBLN2_MOUSE</b> |                                       |             |                                                       |          |
|               |                    | CBLN2_MOUSE 88-103                    | VR - EP     | <sup>88</sup> SGSAKVAFSATRSTNH <sup>103</sup>         | 1620,809 |
|               |                    | CBLN2_MOUSE 88-102                    | VR - HEP    | <sup>88</sup> SGSAKVAFSATRSTN <sup>102</sup>          | 1483,75  |
| <b>P09240</b> | <b>CCKN_MOUSE</b>  |                                       |             |                                                       |          |
|               |                    | CCKN_MOUSE 21-34                      | GALA-RAEEAR | <sup>21</sup> Pyro-Glu(Q)PVVPAEATDPVEQ <sup>34</sup>  | 1462,706 |
|               |                    | CCKN_MOUSE 72-94                      | RK - RD     | <sup>72</sup> APSGRMSVLKQLSLDPSHRISD <sup>94</sup>    | 2508,299 |
|               |                    | CCKN_MOUSE 77-94                      | KAPSGR - RD | <sup>77</sup> MSVLKQLSLDPSHRISD <sup>94</sup>         | 2040,054 |
| <b>P20065</b> | <b>TYB4_MOUSE</b>  |                                       |             |                                                       |          |
|               |                    | TYB4_MOUSE 37-50                      | LP - C-term | <sup>37</sup> SKETIEQEKGAGES <sup>50</sup>            | 1563,75  |
|               |                    | TYB4_MOUSE 38-50                      | KE - C-term | <sup>40</sup> TIEQEKGAGES <sup>50</sup>               | 1219,58  |
| <b>P47867</b> | <b>SCG3_MOUSE</b>  |                                       |             |                                                       |          |
|               |                    | SCG3_MOUSE 38-57                      | KSLHNR - KK | <sup>1</sup> ELSAERPLNEQIAEAEADKI <sup>20</sup>       | 2226,125 |
| <b>P56942</b> | <b>MCH_MOUSE</b>   |                                       |             |                                                       |          |
|               |                    | Neuropeptide-glutamic acid-isoleucine | KR - GRR    | <sup>1</sup> EIGDEENSAKFPI-C-amide <sup>14</sup>      | 1447,728 |

|        |             |                                   |             |                                                            |          |
|--------|-------------|-----------------------------------|-------------|------------------------------------------------------------|----------|
| P63054 | PEP19_MOUSE |                                   |             |                                                            |          |
|        |             | PEP19_MOUSE 2-25                  | N-term - VQ | <sup>2</sup> Acetyl-SERQSAGATNGKDKTSGDNDGQKK <sup>25</sup> | 2521,177 |
| P33587 | PROC_MOUSE  |                                   |             |                                                            |          |
|        |             | PROC_MOUSE 65 - 77                | CD - TL     | <sup>65</sup> FEEAQEIFQNVED <sup>77</sup>                  | 1597,702 |
| P01193 | COLI_MOUSE  |                                   |             |                                                            |          |
|        |             | joining peptide                   | RR - GKR    | <sup>103</sup> AEEEEAVWGDGSPEPSPRE-C-amide <sup>120</sup>  | 1940,862 |
| Q62361 | TRH_MOUSE   |                                   |             |                                                            |          |
|        |             | TRH_MOUSE 25-50                   | CA - RR     | <sup>25</sup> LLEAAQEEGAVTPDLPGLEKVQRPE <sup>50</sup>      | 2788,473 |
| P12961 | 7B2_MOUSE   |                                   |             |                                                            |          |
|        |             | Phosphorylated C-terminal peptide | KK - C-term | <sup>200</sup> SVPHFS(phospho)EEEKEAE <sup>212</sup>       | 1597,642 |
| O70176 | PACA_MOUSE  |                                   |             |                                                            |          |
|        |             | PACA_MOUSE 111-128                | AR-KR       | <sup>111</sup> GAGENLGGSAVDDPAPLT <sup>128</sup>           | 1640,776 |

|        |             |  |              |                                             |          |
|--------|-------------|--|--------------|---------------------------------------------|----------|
|        |             |  |              |                                             |          |
| Q8BME9 | CBLN4_MOUSE |  |              |                                             |          |
|        |             |  | VR-HEP       | <sup>63</sup> AANSKVAFSAVRSTN <sup>77</sup> | 1522,797 |
|        |             |  | AA-HEP       | <sup>66</sup> SKVAFSAVRSTN <sup>77</sup>    | 1266,68  |
| O70251 | EF1B_MOUSE  |  |              |                                             |          |
|        |             |  | N-term - ND  | <sup>1</sup> GFGDLKTPAGLQVL <sup>14</sup>   | 1415,789 |
|        |             |  | N-term - LND | <sup>1</sup> GFGDLKTPAGLQV <sup>13</sup>    | 1302,705 |

#### Mass Matched Peptides

| UniProt | Protein name | Peptide name       | Sequence                                           | Theoretical mass (Da) |
|---------|--------------|--------------------|----------------------------------------------------|-----------------------|
| O35417  | PDYN_MOUSE   |                    |                                                    |                       |
|         |              | Leu-enkephalin     | YGGFL                                              | 555,26928             |
|         |              | PDYN_MOUSE 166-175 | YGGFLRKYPK                                         | 1227,6764             |
| P01193  | COLI_MOUSE   |                    |                                                    |                       |
|         |              | Met-enkephalin     | YGGFM                                              | 573,2257              |
|         |              | Met-enkephalin     | YGGFM(ox)                                          | 589,2206              |
|         |              | COLI_MOUSE 222-231 | FKNAIIKNAH                                         | 1154,656              |
|         |              | COLI_MOUSE 107-120 | AVWGDGSPEPSPRE                                     | 1482,67388            |
| P12961  | 7B2_MOUSE    |                    |                                                    |                       |
|         |              | 7B2_Mouse 167-176  | LLYEKMKGQ                                          | 1165,6165             |
| P20065  | TYB4_MOUSE   |                    |                                                    |                       |
|         |              | Thymosin beta 4    | Acetyl-SDKPDMAEIEKFDKSKLKKTTETQEKNPLPSKETIEQEQAGES | 4960,4862             |

|        |             |                                                  |  |                                                              |            |
|--------|-------------|--------------------------------------------------|--|--------------------------------------------------------------|------------|
|        |             | Thymosin beta 4                                  |  | Acetyl-SDKPDM(ox)AEIEKFDKSKLKKTTETQEKNPLPSKETIEQEQAGES       | 4976,4862  |
| P26339 | CMGA_MOUSE  | Thymosin beta 4                                  |  | Acetyl-SDKPDMAEIEKFDKSKLKKTTETQEKNPLPSKETIEQEQAGES - Phospho | 5040,4526  |
|        |             | CMGA_MOUSE 374-388                               |  | LEGEDDPDRSMKLSF                                              | 1737,78793 |
| P56388 | CART_MOUSE  | CART_MOUSE 28-36                                 |  | Pyro-Glu(Q)EDAELQPR                                          | 1067,4883  |
| P60041 | SMS_MOUSE   | Somatostatin-14                                  |  | AGCKNFFWKTFTSC - Disulphide bridge                           | 1638,73229 |
| P70296 | PEBP_MOUSE  | Hippocampal cholinergic neurostimulating peptide |  | Acetyl-AADISQWAGPL                                           | 1169,5717  |
| Q03517 | SCG2_MOUSE  | SCG2_MOUSE 287-297                               |  | SGQLGLPDEEN                                                  | 1157,52002 |
|        |             | SCG2_MOUSE 300-316                               |  | ESKDQLSEDASKVITYL                                            | 1924,9629  |
| Q6ZWY8 | TYB10_MOUSE | Thymosin beta 10                                 |  | Acetyl-ADKPDMGEIASFDKAKLKKTTETQEKNLPTKETIEQEKRSEIS           | 4933,523   |
| Q9QXV0 | PCSK1_MOUSE | Big LEN                                          |  | LENPSPQAPARRLLPP                                             | 1754,97911 |
| P16014 | SCG1_MOUSE  | SCG1_MOUSE 385-406                               |  | NHPDSELESTANRHGEETEEE                                        | 2409,003   |

#### Novel peptides

| UniProt | Protein name | Peptide name                      |                    | Sequence                                                  | Theoretical Mass (m+h) |
|---------|--------------|-----------------------------------|--------------------|-----------------------------------------------------------|------------------------|
| P22005  | PENK_MOUSE   | PENK_MOUSE 87-97                  | <b>KD-KK</b>       | <sup>87</sup> SSKQDESHLLA <sup>97</sup>                   | 1214,601               |
|         |              | PENK_MOUSE 171-184                | <b>KD - SKR</b>    | <sup>171</sup> SHQQESTNNDSDMS <sup>184</sup>              | 1621,603               |
| P16014  | SCG1_MOUSE   | SCG1_MOUSE 64-86                  | <b>KK - RD</b>     | <sup>64</sup> SGKEVKGEEKGENQNSKFEVRL <sup>86</sup>        | 2605,358               |
|         |              | SCG1_MOUSE 313-330                | <b>RR-KR</b>       | <sup>313</sup> PSPKESKEADVATVRLGE <sup>330</sup>          | 1912,997               |
|         |              | Phosphorylated SCG1_MOUSE 313-330 | <b>RR - KR</b>     | <sup>313</sup> PSPKES(phospho)KEADVATVRLGE <sup>330</sup> | 1992,964               |
| P60041  | SMS_MOUSE    | SMS_MOUSE 87-100                  | <b>EL - RK</b>     | <sup>87</sup> Pyro-Glu(Q)RSANSNPAMAPRE <sup>100</sup>     | 1511,702               |
| P41539  | TKN1_MOUSE   | TKN1_MOUSE 72-95                  | <b>KR - KR</b>     | <sup>72</sup> DADSSVEKQVALLKALYGHGQISH <sup>95</sup>      | 2566,326               |
| O35417  | PDYN_MOUSE   | PDYN_MOUSE 177-199                | <b>KR - KR</b>     | <sup>177</sup> SSEMARDEDGGQDGDQVGHEDLY <sup>199</sup>     | 2510,001               |
|         |              | PDYN_MOUSE 235-248                | <b>TR - C-term</b> | <sup>235</sup> SQENPNTYSEDLDV <sup>248</sup>              | 1610,682               |
| P09240  | CCKN_MOUSE   | CCKN_MOUSE 21-34                  | <b>GALA-RAEEAR</b> | <sup>21</sup> Pyro-Glu(Q)PVVPAEATDPVEQ <sup>34</sup>      | 1462,706               |
|         |              | CCKN_MOUSE 72-94                  | <b>RK - RD</b>     | <sup>72</sup> APSGRMSVLKQLSLDPSHRISD <sup>94</sup>        | 2508,299               |
| Q8BME9  | CBLN4_MOUSE  |                                   |                    | <sup>63</sup> AANSKVAFAVAVRSTN <sup>77</sup>              | 1522,797               |

| Delta mass | z | SwePep    | SwePep   | SwePep    | ANOVA 1  | ANOVA2  | LDOPA-LESION- SAL-LESION- SAL-INTACT |         |             |            | LDOPA-LESION- LDOPA-INTACT |            |
|------------|---|-----------|----------|-----------|----------|---------|--------------------------------------|---------|-------------|------------|----------------------------|------------|
|            |   | precursor | preptide | predicted |          |         | SAL-LESION                           |         | SAL-INTACT  |            | LDOPA-INTACT               |            |
|            |   | log(e)    | log(e)   | log(e)    |          |         | Fold change                          | P-value | Fold change | P-value    | Fold change (log2)         | P-value    |
| 0,879      | 2 | -1,6      | -3,1     |           | 0,160095 | 0,26924 | 0,09                                 | 0,7804  | -0,43       | 0,09911071 | -0,27                      | 0,28061429 |
| -0,263     | 2 | -5,9      |          |           | 0,581442 | 0,61716 | 0,2427807                            | 0,4887  | -0,250319   | 0,40971071 | -0,20127358                | 0,50806071 |
| -0,18      | 2 | -3,7      | -3,8     | -4,8      | 0,085095 | 0,14005 | 0,0116536                            | 0,9706  | -0,266726   | 0,20037857 | -0,41876703                | 0,05600357 |
| -0,175     | 2 | -3,2      | -3,3     | -4,1      | 0,116648 | 0,14634 | -0,002082                            | 0,9935  | -0,331753   | 0,16316071 | -0,40007918                | 0,10063214 |
| -0,244     | 2 | -5,4      | -6,3     | -4,9      | 0,129106 | 0,19982 | 0,0940159                            | 0,721   | -0,268374   | 0,17631071 | -0,32682148                | 0,10810714 |
| -0,216     | 2 | -3,5      | -5,6     | -1,7      | 0,143131 | 0,1774  | 0,0002478                            | 0,9992  | -0,109242   | 0,54545357 | -0,36964191                | 0,05820714 |
| -0,262     | 2 | -3,1      | -3,6     | -3,6      | 0,05307  | 0,08175 | 0,107937                             | 0,6975  | -0,50818    | 0,03860714 | -0,34840932                | 0,14115    |
| -0,181     | 2 | -2,9      | -3,3     | -2        | 0,06208  | 0,10564 | 0,0260744                            | 0,9317  | -0,441669   | 0,08649286 | -0,4666457                 | 0,07395714 |
| 0,258      | 2 | -1,7      | -2,7     | -2,1      | 0,201789 | 0,20361 | 0,4496513                            | 0,1236  | -0,475912   | 0,07404643 | -0,04701084                | 0,84983214 |
| 0,041      | 2 | -9,9      |          | -11,5     | 0,127216 | 0,21944 | 0,4238416                            | 0,2501  | -0,125516   | 0,67946071 | 0,66210821                 | 0,04659286 |
| -0,065     | 2 | -2,2      |          |           | n.a.     | n.a.    | n.a.                                 | n.a.    | n.a.        | n.a.       | n.a.                       | n.a.       |
| -0,112     | 2 | -3,2      | -2,5     |           | 0,066568 | 0,09996 | 0,1134331                            | 0,6583  | -0,324677   | 0,07886786 | -0,31475812                | 0,08986071 |
|            |   |           |          |           |          |         |                                      |         |             |            |                            |            |
| 0,114      | 4 | -2,4      |          |           | n.a.     | n.a.    | n.a.                                 | n.a.    | n.a.        | n.a.       | n.a.                       | n.a.       |
| 0,176      | 2 | -3,5      |          |           | 0,339608 | 0,45645 | -0,099013                            | 0,6345  | 0,228781    | 0,28327857 | 0,22448654                 | 0,29354286 |
| -0,196     | 3 | -2,7      |          | -2,3      | 0,035015 | 0,05272 | -0,236382                            | 0,2552  | 0,509613    | 0,00994643 | 0,02569901                 | 0,88056786 |
| -0,223     | 3 | -2        |          |           | n.a.     | n.a.    | n.a.                                 | n.a.    | n.a.        | n.a.       | n.a.                       | n.a.       |
| -0,165     | 2 | -3,4      |          | -5,3      | 0,08099  | 0,05852 | -0,432015                            | 0,0611  | 0,530282    | 0,028825   | 0,13485309                 | 0,54326786 |
| -0,291     | 2 | -2,5      |          |           | 0,159347 | 0,22349 | -0,17283                             | 0,4069  | 0,436408    | 0,05889286 | 0,08288771                 | 0,69924286 |
| -0,089     | 3 | -5,9      |          | -5,2      | 0,010884 | 0,00873 | -0,242002                            | 0,3397  | 0,680374    | 0,01734643 | 0,62920463                 | 0,02646786 |
| -0,11      | 2 | -2,2      | -3,4     |           | 0,479663 | 0,52085 | -0,185419                            | 0,3215  | 0,222331    | 0,24291429 | 0,06682252                 | 0,717875   |
| -0,194     | 2 | -3,5      | -5,3     | -4,6      | 0,301548 | 0,18665 | -0,333402                            | 0,0604  | 0,282238    | 0,12237857 | -0,01917091                | 0,91208214 |
| -0,191     | 2 | -3,9      |          |           | 0,234412 | 0,03726 | -0,315202                            | 0,0327  | 0,239964    | 0,11453929 | 0,10388039                 | 0,47728214 |
| -0,289     | 2 | -5,4      | -4,6     | -5,4      | 0,287015 | 0,20595 | -0,170674                            | 0,3459  | 0,216099    | 0,25833214 | 0,22208242                 | 0,24761429 |
| 0,214      | 2 | -4,9      |          | -5,8      | n.a.     | n.a.    | n.a.                                 | n.a.    | n.a.        | n.a.       | n.a.                       | n.a.       |
| -0,332     | 2 | -2,4      |          |           | n.a.     | n.a.    | n.a.                                 | n.a.    | n.a.        | n.a.       | n.a.                       | n.a.       |
|            |   |           |          |           |          |         |                                      |         |             |            |                            |            |
| -0,131     | 2 | -6,9      |          |           | 0,017472 | 0,01952 | -0,629767                            | 0,0841  | 0,705173    | 0,00633571 | 0,23087502                 | 0,30393571 |
| -0,238     | 2 | -4,4      | -4,7     | -6        | 0,098894 | 0,13571 | -0,370272                            | 0,1026  | 0,36537     | 0,03879286 | -0,11834032                | 0,47091071 |
| -0,253     | 2 | -3,9      | -5       | -4,1      | 0,118347 | 0,11647 | -0,328622                            | 0,1092  | 0,442291    | 0,04230357 | 0,09398989                 | 0,63951071 |
| -0,256     | 2 | -3,3      | -4,4     | -3,7      | 0,052286 | 0,0479  | -0,506284                            | 0,0418  | 0,536997    | 0,01561071 | 0,04886963                 | 0,80310357 |
| -0,289     | 2 | -3        | -3,7     | -2,9      | n.a.     | n.a.    | n.a.                                 | n.a.    | n.a.        | n.a.       | n.a.                       | n.a.       |
| 0,254      | 2 | -2,1      | -1,5     | -1,5      | n.a.     | n.a.    | n.a.                                 | n.a.    | n.a.        | n.a.       | n.a.                       | n.a.       |
|            |   |           |          |           |          |         |                                      |         |             |            |                            |            |
| -0,196     | 2 | -8,5      | -7,1     | -13,5     | 0,910633 | 0,86245 | -0,124213                            | 0,4587  | -0,010313   | 0,94591071 | -0,06669295                | 0,66705357 |

|        |   |       |       |      |          |         |           |        |           |            |             |            |
|--------|---|-------|-------|------|----------|---------|-----------|--------|-----------|------------|-------------|------------|
| 0,039  | 2 | -6,2  | -6,9  | -6,8 | 0,110618 | 0,14483 | -0,396437 | 0,1411 | 0,098004  | 0,62429643 | -0,45134713 | 0,04058571 |
| -0,291 | 2 | -6,1  | -6,6  | -5,4 | 0,329543 | 0,54652 | -0,145038 | 0,495  | 0,22242   | 0,13819643 | 0,0280637   | 0,84463929 |
| -0,28  | 2 | -5,5  | -4,1  | -6,2 | 0,037809 | 0,05907 | -0,326013 | 0,2304 | -0,00542  | 0,97765    | -0,57943795 | 0,01094286 |
| 0,015  | 2 | -3,6  | -4,1  | -2,8 | 0,137211 | 0,24081 | 0,3307091 | 0,144  | -0,296835 | 0,05845    | 0,10881157  | 0,46283571 |
| -0,194 | 4 | -3,7  | -4,9  | -2,6 | n.a.     | n.a.    | n.a.      | n.a.   | n.a.      | n.a.       | n.a.        | n.a.       |
| -0,196 | 3 | -4,8  | -5,7  | -3,6 | n.a.     | n.a.    | n.a.      | n.a.   | n.a.      | n.a.       | n.a.        | n.a.       |
| -0,187 | 2 | -1,4  | -2    |      | 0,300945 | 0,26134 | 0,3218558 | 0,0985 | -0,256541 | 0,12147857 | 0,00990455  | 0,94970714 |
| -0,282 | 2 | -2,4  | -2    |      | n.a.     | n.a.    | n.a.      | n.a.   | n.a.      | n.a.       | n.a.        | n.a.       |
| -0,133 | 2 | -10,4 | -10,3 | -8,3 | 0,145648 | 0,23441 | 0,1120606 | 0,6357 | -0,26226  | 0,19278571 | -0,3219484  | 0,11845    |
| 0,0071 | 3 | -2,4  |       | -1,4 | 0,121487 | 0,16126 | 0,2772518 | 0,0744 | -0,030764 | 0,82969643 | 0,32086208  | 0,04175357 |
| -0,105 | 3 | -2,6  | -2,5  | -1,6 | n.a.     | n.a.    | n.a.      | n.a.   | n.a.      | n.a.       | n.a.        | n.a.       |
| -0,103 | 3 | -2,4  | -3,4  | -1,4 | n.a.     | n.a.    | n.a.      | n.a.   | n.a.      | n.a.       | n.a.        | n.a.       |
| -0,263 | 2 | -3,1  | -3,9  | -3,8 | n.a.     | n.a.    | n.a.      | n.a.   | n.a.      | n.a.       | n.a.        | n.a.       |
| -0,115 | 2 | -7,3  | -6    |      | 0,091894 | 0,09788 | 0,183027  | 0,2473 | 0,155174  | 0,35065714 | 0,36326222  | 0,04282143 |
| -0,18  | 3 | -5,8  |       | -4,2 | 0,714523 | 0,04793 | 0,7599242 | 0,0205 | -0,027711 | 0,92037143 | 0,2319484   | 0,41511786 |
| -0,132 | 2 | -2    | -3    | -1,2 | 0,919402 | 0,59911 | 0,3554449 | 0,2178 | -0,083588 | 0,68001786 | -0,0064607  | 0,97447857 |
| -0,411 | 2 | -5,9  | -5,9  |      | 0,641618 | 0,18665 | 0,6919434 | 0,0375 | -0,111235 | 0,64288571 | 0,20300638  | 0,40574643 |
| -0,245 | 2 | -5,6  | -6,3  | -5,3 | 0,243683 | 0,37379 | 0,2181138 | 0,2224 | -0,075641 | 0,63353214 | 0,2728503   | 0,10533214 |
| 0,745  | 2 | -8,9  | -9,3  |      | 0,401121 | 0,48952 | -0,270629 | 0,2502 | 0,011591  | 0,95399643 | -0,28739817 | 0,177825   |
| -0,196 | 2 | -4,2  | -4,7  |      | 0,154709 | 0,22811 | -0,258994 | 0,2323 | -0,078159 | 0,6925     | -0,40654278 | 0,05835    |
| -0,168 | 2 | -2,5  |       |      | n.a.     | n.a.    | n.a.      | n.a.   | n.a.      | n.a.       | n.a.        | n.a.       |
| -0,211 | 2 | -2,2  |       |      | n.a.     | n.a.    | n.a.      | n.a.   | n.a.      | n.a.       | n.a.        | n.a.       |
| 0,382  | 3 | -2,4  | -3,9  |      | 0,14903  | 0,32583 | 0,2307525 | 0,3068 | -0,019543 | 0,92276071 | 0,43128586  | 0,05246071 |
| -0,239 | 2 | -4,7  | -6,1  |      | 0,255302 | 0,39098 | 0,2328271 | 0,2647 | -0,095574 | 0,60055    | 0,3044773   | 0,11453571 |
| -0,355 | 2 | -5,1  |       |      | 0,037543 | 0,07477 | 0,0640479 | 0,7124 | 0,250211  | 0,15480357 | 0,42951057  | 0,02365357 |
| -0,088 | 3 | -5,9  | -5,5  |      | 0,013568 | 0,0357  | 0,4776156 | 0,3077 | -0,382103 | 0,33609286 | 1,32728298  | 0,00458214 |
| -0,093 | 3 | -5    | -8,3  |      | n.a.     | n.a.    | n.a.      | n.a.   | n.a.      | n.a.       | n.a.        | n.a.       |
| -0,309 | 3 | -2,8  | -4    |      | n.a.     | n.a.    | n.a.      | n.a.   | n.a.      | n.a.       | n.a.        | n.a.       |
| -0,22  | 2 | -2,8  | -3,1  |      | n.a.     | n.a.    | n.a.      | n.a.   | n.a.      | n.a.       | n.a.        | n.a.       |
| -0,184 | 3 |       |       | -2,6 | 0,003266 | 0,01456 | 0,5237989 | 0,1204 | -0,500903 | 0,05946786 | 0,94009156  | 0,00217143 |
| 0,183  | 2 |       |       | -4,3 | 0,301688 | 0,07752 | -0,245234 | 0,1886 | 0,151397  | 0,40106786 | 0,24700535  | 0,18290357 |

|        |   |      |      |      |          |         |           |        |          |            |             |            |
|--------|---|------|------|------|----------|---------|-----------|--------|----------|------------|-------------|------------|
| 0,725  | 4 |      | -3,7 |      | n.a.     | n.a.    | n.a.      | n.a.   | n.a.     | n.a.       | n.a.        | n.a.       |
| -0,251 | 2 | -2,7 |      |      | n.a.     | n.a.    | n.a.      | n.a.   | n.a.     | n.a.       | n.a.        | n.a.       |
| -0,212 | 2 | -6,9 | -8,4 | -4,8 | n.a.     | n.a.    | n.a.      | n.a.   | n.a.     | n.a.       | n.a.        | n.a.       |
| -0,132 | 3 | -5,9 |      |      | n.a.     | n.a.    | n.a.      | n.a.   | n.a.     | n.a.       | n.a.        | n.a.       |
| -0,171 | 2 | -3,8 |      |      | 0,794447 | 0,88768 | 0,0958585 | 0,5586 | 0,010272 | 0,94713929 | 0,10766699  | 0,499025   |
| -0,426 | 2 | -4,9 |      |      | 0,101226 | 0,12101 | -0,19164  | 0,5281 | 0,400054 | 0,093      | -0,34746103 | 0,14191786 |

| Swiss Prot<br>(rodent) | ANOVA 1    | ANOVA2      | LDOPA-LESION- SAL-<br>LESION |            | SAL-LESION-<br>SAL-INTACT |         | LDOPA-LESION-<br>LDOPA-INTACT |         |
|------------------------|------------|-------------|------------------------------|------------|---------------------------|---------|-------------------------------|---------|
| log(e)                 | p-value    | p-value     | Fold<br>change<br>(log2)     | P-value    | Fold<br>change<br>(log2)  | P-value | Fold<br>change<br>(log2)      | P-value |
| -4,8                   | 0,20904523 | 0,356287129 | -0,0693784                   | 0,70274205 | -0,151001                 | 0,31876 | -0,236927                     | 0,1302  |
| -2,8                   | 0,03676382 | 0,064742574 | -0,1229681                   | 0,50440283 | -0,204382                 | 0,21176 | -0,421652                     | 0,0192  |
| -3                     | n.a.       | n.a.        | n.a.                         | n.a.       | n.a.                      | n.a.    | n.a.                          | n.a.    |
| -3,3                   | n.a.       | n.a.        | n.a.                         | n.a.       | n.a.                      | n.a.    | n.a.                          | n.a.    |

| Exp. mass<br>(Da) | Delta(Da) | ANOVA 1     | ANOVA2    | LDOPA-LESION- SAL-<br>LESION |          | SAL-LESION-<br>SAL-INTACT |           | LDOPA-LESION-<br>LDOPA-INTACT |          |
|-------------------|-----------|-------------|-----------|------------------------------|----------|---------------------------|-----------|-------------------------------|----------|
|                   |           | p-value     | p-value   | Fold change<br>(log2)        | P-value  | Fold<br>change<br>(log2)  | P-value   | Fold<br>change<br>(log2)      | P-value  |
| 555,3308315       | -0,0616   | 0,074623116 | 0,1060099 | 0,10315421                   | 0,718459 | -0,33974                  | 0,1096393 | -0,3822                       | 0,077282 |
| 1227,785          | -0,1086   | 0,778512563 | 0,1886386 | 0,52067154                   | 0,059915 | -0,15235                  | 0,4879321 | 0,0366                        | 0,866439 |
| 573,2856545       | -0,05995  | 0,100542714 | 0,1474455 | 0,09350277                   | 0,723657 | -0,30837                  | 0,1303393 | -0,3407                       | 0,099839 |
| 589,2843          | -0,0637   | 0,39941206  | 0,3428218 | 0,03823526                   | 0,911304 | 0,15523                   | 0,6257964 | -0,4214                       | 0,202561 |
| 1154,585305       | 0,0707    | 0,006954774 | 0,0288515 | 0,07588877                   | 0,813739 | 0,66016                   | 0,0196536 | 0,7245                        | 0,012686 |
| 1481,969          | -0,2791   | n.a.        | n.a.      | n.a.                         | n.a.     | n.a.                      | n.a.      | n.a.                          | n.a.     |
| 1165,751          | -0,1345   | 0,253964824 | 0,4001238 | -0,2746178                   | 0,26835  | 0,19778                   | 0,3691679 | -0,325                        | 0,1531   |
| 4960,85842        | -0,3722   | 0,295316583 | 0,629802  | 0,02786722                   | 0,923152 | -0,10783                  | 0,5897143 | 0,3104                        | 0,140457 |

|             |         |             |           |            |          |          |           |         |          |
|-------------|---------|-------------|-----------|------------|----------|----------|-----------|---------|----------|
| 4976,869    | -0,3828 | 0,686246231 | 0,8473366 | 0,03079206 | 0,912594 | -0,17988 | 0,395     | 0,0424  | 0,838382 |
| 5040,853    | -0,4004 | 0,023291457 | 0,1835396 | 0,05313159 | 0,829473 | 0,15907  | 0,3470321 | 0,5136  | 0,008375 |
| 1737,947    | -0,1591 | 0,228427136 | 0,3193119 | 0,13668479 | 0,488926 | 0,09891  | 0,6318179 | 0,3649  | 0,097232 |
| 1067,59     | -0,1017 | 0,043939698 | 0,0694851 | -0,3139781 | 0,413367 | 0,6451   | 0,0126321 | 0,0028  | 0,989743 |
| 1636,871069 | -0,1544 | 0,619170854 | 0,6357129 | 0,02451491 | 0,944746 | -0,13623 | 0,7019071 | 0,3318  | 0,362807 |
| 1169,632061 | -0,0604 | 0,010035176 | 0,0047574 | 0,03294183 | 0,89476  | -0,04526 | 0,8327286 | 0,7949  | 0,002639 |
| 1157,635    | -0,115  | 0,559190955 | 0,3695545 | 0,02627346 | 0,901258 | 0,20238  | 0,3174036 | -0,0868 | 0,662054 |
| 1925,041331 | -0,0784 | 0,270105528 | 0,414995  | 0,23607284 | 0,210283 | -0,25741 | 0,13015   | 0,103   | 0,530336 |
| 4933,897    | -0,3741 | 0,07181407  | 0,3257772 | 0,18218369 | 0,747905 | -0,24597 | 0,5653679 | 1,069   | 0,025632 |
| 1755,136076 | -0,157  | 0,315346734 | 0,3631386 | -0,4119873 | 0,127247 | 0,1713   | 0,3955821 | -0,2672 | 0,196382 |
| 2409,198    | -0,195  | 0,025567839 | 0,0814802 | -0,1743367 | 0,548459 | 0,37511  | 0,1301464 | 0,6499  | 0,016289 |



| Match | Exp. Mass Q-<br>tof (Da) | Elution<br>Time (min) | Theoretical<br>Mass (Da) | Precursor          | Peptide Sequence   | ANOVA1            | ANOVA1        |
|-------|--------------------------|-----------------------|--------------------------|--------------------|--------------------|-------------------|---------------|
|       |                          |                       |                          |                    |                    | p-value<br>(perm) | p-value (tab) |
| 1     | 1243,68                  | 15,35                 | 1243,56                  | P60041 SMS_MOUSE   | SANSNPAMAPRE       | 0,09889447        | 0,07482205    |
| 2     | 620,39                   | 14,74                 |                          |                    |                    | 0,96054774        | 0,95937168    |
| 3     | 1368,70                  | 15,35                 |                          |                    |                    | 0,32145226        | 0,31497728    |
| 4     | 734,49                   | 13,84                 |                          |                    |                    | 0,53316583        | 0,62979817    |
| 5     | 1620,73                  | 12,28                 | 1620,60                  | P22005 PENK_MOUSE  | SHQQESTNDEEDMS     | 0,58144221        | 0,65827017    |
| 6     | 762,48                   | 14,75                 |                          |                    |                    | 0,97527136        | 0,97704106    |
| 7     | 895,54                   | 16,78                 |                          |                    |                    | 0,77324623        | 0,72804605    |
| 8     | 1114,63                  | 14,63                 | 1114,52                  | P60041 SMS_MOUSE   | SANSNPAMAPR        | 0,05228643        | 0,05383709    |
| 9     | 907,64                   | 13,84                 |                          |                    |                    | 0,80305528        | 0,83157774    |
| 11    | 767,61                   | 17,95                 |                          |                    |                    | 0,36467337        | 0,23926513    |
| 12    | 627,47                   | 17,95                 |                          |                    |                    | 0,96340201        | 0,94882351    |
| 13    | 851,59                   | 35,52                 |                          |                    |                    | 0,42698995        | 0,34049356    |
| 14    | 634,42                   | 20,10                 |                          |                    |                    | 0,36042211        | 0,33311685    |
| 15    | 598,45                   | 20,10                 |                          |                    |                    | 0,78930151        | 0,70685655    |
| 17    | 717,47                   | 13,84                 |                          |                    |                    | 0,45725628        | 0,57284284    |
| 18    | 634,42                   | 21,17                 |                          |                    |                    | 0,90773367        | 0,88737351    |
| 19    | 560,36                   | 15,11                 |                          |                    |                    | 0,49776884        | 0,45901078    |
| 20    | 1422,83                  | 13,68                 |                          |                    |                    | 0,0039196         | 0,00558327    |
| 21    | 652,03                   | 7,63                  |                          |                    |                    | 0,41932161        | 0,48307968    |
| 22    | 1631,98                  | 19,03                 | 1631,84                  | Q9R171 CBLN1_MOUSE | SGSAKVAFSAIRSTNH   | 0,4011206         | 0,40654449    |
| 23    | 2836,51                  | 19,09                 |                          |                    |                    | 0,04794472        | 0,05888891    |
| 24    | 584,43                   | 18,63                 |                          |                    |                    | 0,04721608        | 0,03782766    |
| 25    | 712,48                   | 26,76                 |                          |                    |                    | 0,5378392         | 0,41894507    |
| 26    | 767,61                   | 18,87                 |                          |                    |                    | 0,33841206        | 0,23107473    |
| 27    | 1327,68                  | 15,20                 |                          |                    |                    | 0,04620101        | 0,03088974    |
| 28    | 1213,71                  | 17,87                 | 1213,59                  | P22005 PENK_MOUSE  | SSKQDESHLLA        | 0,16009548        | 0,20258228    |
| 29    | 598,45                   | 21,19                 |                          |                    |                    | 0,54741206        | 0,44218226    |
| 30    | 1144,64                  | 16,69                 | 1144,52                  | P22005 PENK_MOUSE  | SPQLEDEAKE         | 0,05307035        | 0,06824993    |
| 31    | 774,48                   | 14,96                 |                          |                    |                    | 0,37037186        | 0,29461999    |
| 32    | 1912,16                  | 19,52                 |                          | P16014 SCG1_MOUSE  | PSPKESKEADVATVRLGE | 0,03501508        | 0,02709049    |
| 34    | 723,58                   | 18,46                 |                          |                    |                    | 0,04891457        | 0,03361545    |
| 36    | 1837,04                  | 13,95                 | 1836,88                  | P16014 SCG1_MOUSE  | GRGREPGAHSALDTREE  | 0,01088442        | 0,02072976    |
| 38    | 600,39                   | 15,57                 |                          |                    |                    | 0,80889447        | 0,77316716    |
| 39    | 723,58                   | 19,37                 |                          |                    |                    | 0,10625628        | 0,09250249    |
| 41    | 684,45                   | 20,86                 |                          |                    |                    | 0,72275879        | 0,64289677    |
| 42    | 1521,92                  | 18,39                 | 1521,79                  | Q8BME9 CBLN4_MOUSE | AANSKVAFSAVRSTN    | 0,20904523        | 0,15062243    |
| 43    | 945,53                   | 22,08                 | 945,44                   | P22005 PENK_MOUSE  | YGGFM(ox)RSL       | 0,11664824        | 0,14213615    |
| 44    | 1361,92                  | 24,05                 |                          |                    |                    | 0,81336683        | 0,74108604    |
| 45    | 1265,79                  | 17,87                 | 1265,67                  | Q8BME9 CBLN4_MOUSE | SKVAFSAVRSTN       | 0,03676382        | 0,02536538    |
| 46    | 1378,95                  | 24,04                 |                          |                    |                    | 0,60119095        | 0,46231543    |
| 47    | 995,69                   | 27,31                 |                          |                    |                    | 0,68046231        | 0,59398301    |

|     |         |       |         |                           |                           |            |            |
|-----|---------|-------|---------|---------------------------|---------------------------|------------|------------|
| 49  | 2409,20 | 16,55 | 2409,00 | <b>P16014 SCG1_MOUSE</b>  | NHPDSELESTANRHGEETEEE     | 0,02556784 | 0,03620771 |
| 50  | 1214,88 | 28,04 |         |                           |                           | 0,50444221 | 0,44900288 |
| 51  | 980,84  | 24,67 |         |                           |                           | 0,71959799 | 0,71388203 |
| 54  | 1027,64 | 18,98 | 1027,54 | <b>O35417 PDYN_MOUSE</b>  | PKLKWDNQ                  | 0,91940201 | 0,91850547 |
| 55  | 756,52  | 27,80 |         |                           |                           | 0,86977387 | 0,80729594 |
| 58  | 809,62  | 20,78 |         |                           |                           | 0,11657286 | 0,10577114 |
| 59  | 867,63  | 20,76 |         |                           |                           | 0,04169347 | 0,03518906 |
| 60  | 809,62  | 19,81 |         |                           |                           | 0,54421608 | 0,52477955 |
| 61  | 1482,88 | 16,62 | 1482,74 | <b>Q8BGU2 CBLN2_MOUSE</b> | SGSAKVAFSATRSTN           | 0,25530151 | 0,23590675 |
| 63  | 764,56  | 28,49 |         |                           |                           | 0,29133668 | 0,2216955  |
| 65  | 927,66  | 20,51 |         |                           |                           | 0,96794975 | 0,95982172 |
| 66  | 1050,81 | 19,49 |         |                           |                           | 0,16202513 | 0,13897863 |
| 68  | 1494,91 | 20,44 | 1494,78 | <b>Q9R171 CBLN1_MOUSE</b> | SGSAKVAFSAIRSTN           | 0,15470854 | 0,15592044 |
| 69  | 663,18  | 8,59  |         |                           |                           | 0,62654774 | 0,6812828  |
| 70  | 849,62  | 23,66 |         |                           |                           | 0,55600503 | 0,38730532 |
| 73  | 586,38  | 39,52 |         |                           |                           | 0,65215075 | 0,57227623 |
| 75  | 1155,58 | 14,10 | 1155,47 | <b>P16014 SCG1_MOUSE</b>  | SEESQEREY                 | 0,08098995 | 0,09673596 |
| 76  | 1286,81 | 20,48 |         |                           |                           | 0,00025628 | 0,0002782  |
| 78  | 1362,95 | 28,04 |         |                           |                           | 0,20782915 | 0,12629241 |
| 79  | 1050,80 | 20,16 |         |                           |                           | 0,52658794 | 0,42246834 |
| 81  | 698,47  | 23,86 |         |                           |                           | 0,05490452 | 0,203318   |
| 83  | 640,46  | 24,05 |         |                           |                           | 0,02044724 | 0,00580131 |
| 87  | 1219,71 | 25,72 | 1219,60 | <b>P26339 CMGA_MOUSE</b>  | AYGFRDPGPQL               | 0,09189447 | 0,07044541 |
| 88  | 516,35  | 25,78 |         |                           |                           | 0,65592462 | 0,57880562 |
| 89  | 1259,68 | 13,40 | 1259,56 | <b>P60041 SMS_MOUSE</b>   | SANSNPAM(ox)APRE          | 0,11834673 | 0,1214717  |
| 91  | 844,54  | 23,86 |         |                           |                           | 0,12447739 | 0,23491445 |
| 92  | 581,34  | 25,94 |         |                           |                           | 0,59904523 | 0,54410727 |
| 93  | 1006,78 | 20,58 |         |                           |                           | 0,13271357 | 0,1847195  |
| 95  | 1006,78 | 21,29 |         |                           |                           | 0,04180402 | 0,02916193 |
| 98  | 1235,55 | 15,76 | 1235,43 | <b>P16014 SCG1_MOUSE</b>  | R.SEES(phospho)QEREY.K    | 0,15934673 | 0,17569257 |
| 99  | 1198,77 | 28,30 |         |                           |                           | 0,23184422 | 0,18541516 |
| 101 | 627,47  | 24,34 |         |                           |                           | 0,21698995 | 0,19888621 |
| 102 | 1329,83 | 28,30 |         |                           |                           | 0,10856281 | 0,08698888 |
| 103 | 899,64  | 28,68 |         |                           |                           | 0,95338191 | 0,96327416 |
| 104 | 1050,81 | 20,85 |         |                           |                           | 0,11776382 | 0,08212787 |
| 105 | 910,67  | 24,35 |         |                           |                           | 0,30951256 | 0,300703   |
| 106 | 1227,79 | 19,90 | 1227,68 | <b>O35417 PDYN_MOUSE</b>  | YGGFLRKYPK                | 0,77851256 | 0,78574143 |
| 107 | 1914,17 | 19,95 |         |                           |                           | 0,94844221 | 0,93842992 |
| 108 | 874,56  | 22,67 |         |                           |                           | 0,21416583 | 0,18022046 |
| 109 | 1169,63 | 13,56 | 1169,57 | <b>P70296 PEBP_MOUSE</b>  | AADISQWAGPL               | 0,01003518 | 0,01361028 |
| 110 | 1164,85 | 24,35 |         |                           |                           | 0,12011558 | 0,09444204 |
| 111 | 1346,86 | 28,29 | 1346,73 | <b>P41539 TKN1_MOUSE</b>  | RPKPQQFFGLM(C-term amide) | 0,13721106 | 0,08815719 |
| 113 | 881,65  | 22,09 |         |                           |                           | 0,78473367 | 0,68830397 |
| 114 | 931,58  | 24,91 |         |                           |                           | 0,88463317 | 0,88684237 |
| 115 | 573,28  | 26,09 | 573,23  | <b>P01193 COLI_MOUSE</b>  | YGGFM                     | 0,10054271 | 0,09800422 |
| 116 | 1278,75 | 25,43 | 1278,63 | <b>P21661 NEC2_MOUSE</b>  | IKMALQQEGFD               | 0,24368342 | 0,19517877 |
| 117 | 892,48  | 23,88 |         |                           |                           | 0,03120101 | 0,03308261 |

|     |         |       |         |                           |                                                     |            |            |
|-----|---------|-------|---------|---------------------------|-----------------------------------------------------|------------|------------|
| 118 | 1321,72 | 18,81 | 1321,59 | <b>P16014 SCG1_MOUSE</b>  | YPQSKWQEQE                                          | 0,23441206 | 0,16815723 |
| 119 | 1169,73 | 17,88 |         |                           |                                                     | 0,4860201  | 0,44115576 |
| 120 | 881,65  | 22,82 |         |                           |                                                     | 0,21839196 | 0,15640466 |
| 121 | 616,41  | 27,62 |         |                           |                                                     | 0,55458794 | 0,59305135 |
| 122 | 929,53  | 26,98 | 929,44  | <b>P22005 PENK_MOUSE</b>  | YGGFMRSL                                            | 0,08509548 | 0,0896582  |
| 123 | 627,47  | 22,82 |         |                           |                                                     | 0,34346231 | 0,24254604 |
| 124 | 1530,85 | 20,76 |         |                           |                                                     | 0,00028141 | 0,00018069 |
| 125 | 1385,79 | 22,57 | 1385,67 | <b>P22005 PENK_MOUSE</b>  | SPQLEDEAKELQ                                        | 0,12910553 | 0,12285104 |
| 126 | 741,51  | 24,29 |         |                           |                                                     | 0,24038191 | 0,21804056 |
| 127 | 1510,82 | 22,58 |         |                           |                                                     | 0,21513065 | 0,25048578 |
| 128 | 1446,83 | 25,60 | 1446,72 | <b>P56942 MCH_MOUSE</b>   | EIGDEENSAKFPI(C-term amide)                         | 0,30168844 | 0,27560352 |
| 130 | 4933,90 | 23,07 | 4933,52 | <b>Q6ZWY8/TYB10_MOUSE</b> | Acetyl-ADKPDMEIASFDKAKLKKTTETQEKNLPTKETIEQEKRSSEIS  | 0,07181407 | 0,19045347 |
| 134 | 756,52  | 28,80 |         |                           |                                                     | 0,75959799 | 0,64710999 |
| 135 | 5085,87 | 21,91 |         |                           |                                                     | 0,09291457 | 0,13991447 |
| 136 | 4960,88 | 21,91 | 4960,49 | <b>P20065/TYB4_MOUSE</b>  | Ac-SDKPDMAEIEKFDKSKLKKTTETQEKNPLPSKETIEQEKQAGES     | 0,29531658 | 0,29016986 |
| 137 | 4942,97 | 21,90 |         |                           |                                                     | 0,18750251 | 0,23135341 |
| 138 | 776,45  | 22,73 |         |                           |                                                     | 0,00162312 | 0,00028635 |
| 139 | 1448,05 | 25,26 |         |                           |                                                     | 0,17586935 | 0,24993775 |
| 140 | 649,41  | 19,18 |         |                           |                                                     | 0,6610804  | 0,6371411  |
| 142 | 655,42  | 26,33 |         |                           |                                                     | 0,12396985 | 0,07773509 |
| 143 | 712,49  | 29,44 |         |                           |                                                     | 0,99472864 | 0,99256679 |
| 144 | 4855,73 | 21,90 |         |                           |                                                     | 0,39335176 | 0,42841982 |
| 145 | 785,57  | 22,33 |         |                           |                                                     | 0,85676884 | 0,88586729 |
| 146 | 865,50  | 21,41 |         |                           |                                                     | 0,21359799 | 0,21210737 |
| 148 | 1334,01 | 21,97 |         |                           |                                                     | 0,10631156 | 0,16436132 |
| 149 | 660,37  | 17,64 |         |                           |                                                     | 0,18199497 | 0,1757509  |
| 150 | 1878,24 | 26,03 |         |                           |                                                     | 0,00670854 | 0,00455814 |
| 152 | 837,62  | 23,38 |         |                           |                                                     | 0,04052261 | 0,02914676 |
| 153 | 1073,63 | 18,20 | 1073,52 | <b>P22005 PENK_MOUSE</b>  | LEDEAKELQ                                           | 0,0620804  | 0,08728686 |
| 154 | 841,41  | 18,11 |         |                           |                                                     | 0,44672864 | 0,45393527 |
| 155 | 767,61  | 17,03 |         |                           |                                                     | 0,79987437 | 0,7127661  |
| 156 | 923,66  | 25,19 |         |                           |                                                     | 0,49115075 | 0,41506199 |
| 157 | 739,43  | 19,09 |         |                           |                                                     | 0,28461307 | 0,26931899 |
| 158 | 1591,88 | 25,57 |         |                           |                                                     | 0,00013568 | 4,63E-05   |
| 160 | 1995,12 | 23,84 | 1995,94 | <b>P26339 CMGA_MOUSE</b>  | LEGEDDPDRSMKLSFRT                                   | 0,12148744 | 0,07738745 |
| 161 | 984,60  | 25,42 |         |                           |                                                     | 0,42873367 | 0,37258941 |
| 162 | 981,48  | 24,85 |         |                           |                                                     | 0,11048744 | 0,03184329 |
| 163 | 1132,69 | 25,41 | 1132,57 | <b>P41539 TKN1_MOUSE</b>  | HKTDSFVGLM(C-term amide)                            | 0,30094472 | 0,24371982 |
| 164 | 712,49  | 32,08 |         |                           |                                                     | 0,60978894 | 0,48522449 |
| 165 | 4976,87 | 20,50 | 4976,49 | <b>P20065/TYB4_MOUSE</b>  | Ac-SDKPDMAEIEKFDKSKLKKTTETQEKNPLPSKETIEQEKQAGES(ox) | 0,68624623 | 0,69135767 |
| 167 | 764,56  | 29,32 |         |                           |                                                     | 0,58000503 | 0,49855767 |
| 171 | 1653,82 | 17,28 | 1653,67 | <b>P16014 SCG1_MOUSE</b>  | HIEDS(phospho)GKPNTFNSN                             | 0,33960804 | 0,35019761 |
| 172 | 1041,62 | 24,56 | 1041,51 | <b>P16014 SCG1_MOUSE</b>  | LLDEGHYPV                                           | 0,47966332 | 0,45924097 |
| 174 | 1116,70 | 27,27 | 1116,59 | <b>P16014 SCG1_MOUSE</b>  | SFARAPQLDL                                          | 0,28701508 | 0,27246628 |
| 175 | 1278,89 | 27,99 |         |                           |                                                     | 0,03093467 | 0,03561438 |
| 176 | 2509,19 | 21,28 | 2508,99 | <b>O35417 PDYN_MOUSE</b>  | SSEMARDEDGGQDGDQVGHEDLY                             | 0,71452261 | 0,76424201 |
| 177 | 1911,10 | 24,18 | 1911,99 | <b>P16014 SCG1_MOUSE</b>  | LLDEGHYPVRESPIDTA                                   | 0,30154774 | 0,26979602 |

|     |         |       |         |                           |                         |            |            |
|-----|---------|-------|---------|---------------------------|-------------------------|------------|------------|
| 178 | 1844,99 | 24,11 | 1844,84 | <b>P41539 TKN1_MOUSE</b>  | ALNSVAYERSAMQNYE        | 0,14564824 | 0,14182648 |
| 180 | 741,52  | 22,19 |         |                           |                         | 0,7010603  | 0,66996031 |
| 183 | 876,48  | 28,90 | 876,40  | <b>P22005 PENK_MOUSE</b>  | YGGFMRF                 | 0,06656784 | 0,05416683 |
| 187 | 1022,60 | 18,17 | 1022,50 | <b>Q9QXV0 PCSK1_MOUSE</b> | LENPSPQAPA              | 0,03780905 | 0,03980141 |
| 188 | 1678,10 | 25,91 |         |                           |                         | 0,10476382 | 0,06327213 |
| 192 | 1164,85 | 23,55 |         |                           |                         | 0,24131658 | 0,17692331 |
| 193 | 2667,58 | 24,19 |         |                           |                         | 0,02958291 | 0,03303724 |
| 194 | 1120,82 | 24,79 |         |                           |                         | 0,03839698 | 0,05339909 |
| 198 | 642,47  | 22,66 |         |                           |                         | 0,3488392  | 0,50780913 |
| 199 | 1257,73 | 23,77 | 1257,61 | <b>P22005 PENK_MOUSE</b>  | SPQLEDEAKEL             | 0,14313065 | 0,12695866 |
| 200 | 1596,78 | 21,12 | 1596,63 | <b>P12961 7B2_MOUSE</b>   | SVPHFS(phospho)EEEEKEAE | 0,79444724 | 0,75815084 |
| 201 | 731,41  | 18,57 |         |                           |                         | 0,30508543 | 0,27161048 |
| 202 | 589,28  | 20,51 | 589,22  | <b>P01193 COLI_MOUSE</b>  | YGGFM-ox                | 0,39941206 | 0,51101081 |
| 209 | 555,33  | 28,91 | 555,27  | <b>O35417 PDYN_MOUSE</b>  | YGGFL                   | 0,07462312 | 0,07711113 |
| 210 | 644,45  | 17,09 |         |                           |                         | 0,17564824 | 0,16144543 |
| 217 | 1206,86 | 25,91 |         |                           |                         | 0,08356281 | 0,15212475 |
| 218 | 633,40  | 23,82 |         |                           |                         | 0,08273367 | 0,09056707 |
| 220 | 1812,15 | 31,05 | 1812,00 | <b>Q9QXV0 PCSK1_MOUSE</b> | SLSAASAPLVETSTPLRL      | 0,91063317 | 0,88996421 |
| 221 | 1465,78 | 31,03 | 1465,64 | <b>P22005 PENK_MOUSE</b>  | VGRPEWWMYDQ             | 0,20178894 | 0,24784832 |
| 227 | 1737,95 | 26,73 | 1737,79 | <b>P26339 CMGA_MOUSE</b>  | LEGEDDPDRSMKLSF         | 0,22842714 | 0,23689983 |
| 230 | 1609,82 | 25,22 | 1609,67 | <b>O35417 PDYN_MOUSE</b>  | SQENPNTYSEDLDV          | 0,64161809 | 0,67430568 |
| 231 | 898,45  | 24,31 |         |                           |                         | 0,30703015 | 0,22739891 |
| 232 | 774,47  | 29,40 |         |                           |                         | 0,00234673 | 0,01251357 |
| 234 | 754,54  | 37,93 |         |                           |                         | 0,69726131 | 0,61201048 |
| 239 | 1157,64 | 23,71 | 1157,52 | <b>Q03517 SCG2_MOUSE</b>  | SGQLGLPDEEN             | 0,55919095 | 0,55309565 |
| 241 | 823,43  | 26,95 |         |                           |                         | 0,75981407 | 0,74688056 |
| 243 | 2056,18 | 28,71 |         |                           |                         | 0,00025126 | 0,00030529 |
| 249 | 869,58  | 36,36 |         |                           |                         | 0,47694975 | 0,36540551 |
| 257 | 1731,25 | 25,83 |         |                           |                         | 0,31130653 | 0,23648036 |
| 261 | 627,47  | 20,84 |         |                           |                         | 0,16       | 0,22612064 |
| 264 | 618,32  | 30,90 |         |                           |                         | 0,1051005  | 0,10429918 |
| 265 | 951,61  | 32,74 |         |                           |                         | 0,41300503 | 0,39021531 |
| 266 | 1448,05 | 25,19 |         |                           |                         | 0,01439196 | 0,02464831 |
| 267 | 532,94  | 8,25  |         |                           |                         | 0,08459296 | 0,17355385 |
| 270 | 932,47  | 30,90 |         |                           |                         | 0,13292462 | 0,1413334  |
| 275 | 785,57  | 23,25 |         |                           |                         | 0,98457286 | 0,98859573 |
| 285 | 502,35  | 24,73 |         |                           |                         | 0,10842211 | 0,08634514 |
| 287 | 540,31  | 24,73 |         |                           |                         | 0,48756281 | 0,36400924 |
| 293 | 627,47  | 22,22 |         |                           |                         | 0,05857286 | 0,05795352 |
| 294 | 581,38  | 33,61 |         |                           |                         | 0,09913568 | 0,0802459  |
| 297 | 910,47  | 22,96 |         |                           |                         | 0,44381407 | 0,40950159 |
| 298 | 573,30  | 35,25 |         |                           |                         | 0,23724121 | 0,2821645  |
| 299 | 890,61  | 13,85 |         |                           |                         | 0,9021809  | 0,91302783 |
| 300 | 642,47  | 21,00 |         |                           |                         | 0,04075377 | 0,00964754 |
| 301 | 1154,59 | 11,53 | 1154,66 | <b>P01193 COLI_MOUSE</b>  | FKNAIIKNAH              | 0,00695477 | 0,01349243 |
| 302 | 2674,45 | 19,11 |         |                           |                         | 0,23876884 | 0,20474775 |
| 303 | 1067,68 | 13,67 |         |                           |                         | 0,0040402  | 0,00575987 |

|     |         |       |         |                           |                                                       |            |            |
|-----|---------|-------|---------|---------------------------|-------------------------------------------------------|------------|------------|
| 304 | 2179,23 | 15,24 |         |                           | 0,00198492                                            | 0,00268789 |            |
| 306 | 2023,13 | 16,68 |         |                           | 0,02115578                                            | 0,02185192 |            |
| 308 | 1057,72 | 21,71 |         |                           | 0,21326633                                            | 0,12810085 |            |
| 309 | 1582,92 | 16,13 |         |                           | 0,26547236                                            | 0,21646777 |            |
| 310 | 1165,75 | 19,20 | 1165,62 | <b>P12961 7B2_MOUSE</b>   | LLYEKMKGGQ                                            | 0,25396482 | 0,27429051 |
| 312 | 727,50  | 23,68 |         |                           | 0,57388442                                            | 0,49257895 |            |
| 313 | 712,49  | 28,37 |         |                           | 0,17436181                                            | 0,07170384 |            |
| 314 | 983,60  | 20,32 |         |                           | 0,29041206                                            | 0,27654015 |            |
| 315 | 2532,29 | 16,10 |         |                           | 0,09989447                                            | 0,1011071  |            |
| 316 | 1755,13 | 22,88 | 1754,98 | <b>Q9QXV0 PCSK1_MOUSE</b> | LENPSPQAPARRLLPP                                      | 0,31534673 | 0,31546085 |
| 317 | 594,28  | 17,58 |         |                           | 0,71644724                                            | 0,75949547 |            |
| 321 | 841,58  | 20,80 |         |                           | 0,13841709                                            | 0,05352231 |            |
| 322 | 758,49  | 23,02 |         |                           | 0,42347236                                            | 0,3568404  |            |
| 323 | 5040,85 | 22,38 | 5040,45 | <b>P20065/TYB4_MOUSE</b>  | Ac-SDKPDMAEIEKFDKSKLKKKTETQEKNPLPSKETIEQEQKAGES(phos) | 0,02329146 | 0,01634022 |
| 324 | 917,62  | 22,79 |         |                           | 0,17776884                                            | 0,19896472 |            |
| 325 | 564,37  | 19,02 |         |                           | 0,03420603                                            | 0,03627405 |            |
| 326 | 1539,77 | 17,93 |         |                           | 0,1081407                                             | 0,11180906 |            |
| 328 | 552,27  | 17,59 |         |                           | 0,41328141                                            | 0,47476044 |            |
| 330 | 1925,04 | 25,54 | 1924,96 | <b>Q03517 SCG2_MOUSE</b>  | ESKDQLSEDASKVITYL                                     | 0,27010553 | 0,22474053 |
| 331 | 566,42  | 24,13 |         |                           | 0,95242714                                            | 0,91823895 |            |
| 332 | 1580,91 | 29,53 |         |                           | 0,87444221                                            | 0,87964122 |            |
| 334 | 1542,95 | 29,53 | 1542,81 | <b>Q9QXV0 PCSK1_MOUSE</b> | SLSAASAPLVETSTPL                                      | 0,11061809 | 0,11038997 |
| 335 | 1803,12 | 25,92 |         |                           | 0,03009045                                            | 0,0223184  |            |
| 336 | 1259,84 | 26,91 |         |                           | 0,50888945                                            | 0,38751213 |            |
| 346 | 851,98  | 41,88 |         |                           | 0,28471859                                            | 0,27650162 |            |
| 348 | 510,28  | 29,99 |         |                           | 0,62006533                                            | 0,55266533 |            |
| 353 | 524,31  | 27,72 |         |                           | 0,2340201                                             | 0,19973435 |            |
| 355 | 598,35  | 31,93 |         |                           | 0,54083417                                            | 0,52667342 |            |
| 357 | 909,55  | 32,37 |         |                           | 0,03007538                                            | 0,01285544 |            |
| 361 | 628,38  | 26,67 |         |                           | 0,01726131                                            | 0,00580892 |            |
| 362 | 716,43  | 28,10 |         |                           | 0,0198794                                             | 0,02299869 |            |
| 363 | 512,28  | 22,36 |         |                           | 0,46599497                                            | 0,2199292  |            |
| 364 | 590,41  | 26,68 |         |                           | 0,08765327                                            | 0,08541926 |            |
| 367 | 925,46  | 24,97 |         |                           | 0,06959296                                            | 0,04885689 |            |
| 373 | 607,44  | 26,67 |         |                           | 0,11919095                                            | 0,14260722 |            |
| 374 | 712,49  | 38,51 |         |                           | 0,47105528                                            | 0,37827209 |            |
| 375 | 634,30  | 30,90 |         |                           | 0,2220804                                             | 0,21804655 |            |
| 378 | 538,33  | 30,28 |         |                           | 0,95207035                                            | 0,95295926 |            |
| 380 | 916,49  | 30,92 |         |                           | 0,12855779                                            | 0,16259162 |            |
| 381 | 568,34  | 28,45 |         |                           | 0,25786432                                            | 0,20463561 |            |
| 382 | 556,31  | 23,64 |         |                           | 0,22671859                                            | 0,10302005 |            |
| 383 | 582,40  | 38,06 |         |                           | 0,13885427                                            | 0,18912646 |            |
| 384 | 651,47  | 27,44 |         |                           | 0,07328141                                            | 0,09789416 |            |
| 388 | 712,49  | 34,81 |         |                           | 0,7098794                                             | 0,67161109 |            |
| 389 | 760,46  | 28,67 |         |                           | 0,00669849                                            | 0,00784621 |            |
| 391 | 563,41  | 25,73 |         |                           | 0,14601508                                            | 0,14074353 |            |
| 392 | 584,34  | 25,73 |         |                           | 0,18364322                                            | 0,10064935 |            |

|     |         |       |         |                           |                          |            |            |
|-----|---------|-------|---------|---------------------------|--------------------------|------------|------------|
| 393 | 1461,83 | 27,14 | 1461,70 | <b>P09240 CCKN_MOUSE</b>  | Pyro-Glu(Q)PVVPAEATDPVEQ | 0,03754271 | 0,02896056 |
| 395 | 524,34  | 24,70 |         |                           |                          | 0,64620603 | 0,67223473 |
| 396 | 614,46  | 41,17 |         |                           |                          | 0,08180402 | 0,07225909 |
| 406 | 573,29  | 27,56 |         |                           |                          | 0,21198995 | 0,22599231 |
| 407 | 698,31  | 26,10 |         |                           |                          | 0,38902513 | 0,41302362 |
| 408 | 1541,92 | 20,85 |         |                           |                          | 0,72780905 | 0,74388669 |
| 409 | 712,49  | 26,32 |         |                           |                          | 0,06411055 | 0,31858858 |
| 411 | 5746,05 | 21,90 |         |                           |                          | 0,00023618 | 0,0002234  |
| 416 | 906,50  | 21,37 |         |                           |                          | 0,97804523 | 0,96844278 |
| 417 | 629,40  | 19,70 |         |                           |                          | 0,83413065 | 0,80144549 |
| 418 | 712,49  | 27,79 |         |                           |                          | 0,56201005 | 0,61600288 |
| 422 | 894,47  | 28,10 |         |                           |                          | 0,11650251 | 0,08583514 |
| 426 | 612,37  | 29,31 |         |                           |                          | 0,48283417 | 0,45153257 |
| 427 | 804,49  | 29,36 |         |                           |                          | 0,04023618 | 0,06877665 |
| 428 | 820,03  | 41,88 |         |                           |                          | 0,99164322 | 0,99101675 |
| 429 | 1937,16 | 31,07 |         |                           |                          | 0,04519095 | 0,04729305 |
| 430 | 712,49  | 29,01 |         |                           |                          | 0,99855779 | 0,99828173 |
| 431 | 834,01  | 41,89 |         |                           |                          | 0,85968844 | 0,87195886 |
| 439 | 1264,87 | 25,70 |         |                           |                          | 0,02548241 | 0,0209444  |
| 440 | 510,27  | 24,55 |         |                           |                          | 0,3711809  | 0,39252852 |
| 441 | 985,48  | 23,71 |         |                           |                          | 0,06313568 | 0,04812154 |
| 444 | 626,39  | 32,24 |         |                           |                          | 0,22854271 | 0,21229143 |
| 448 | 1334,01 | 21,84 |         |                           |                          | 0,85760302 | 0,90373152 |
| 452 | 546,38  | 25,73 |         |                           |                          | 0,2589598  | 0,21447665 |
| 453 | 712,49  | 35,93 |         |                           |                          | 0,39829648 | 0,30036934 |
| 454 | 712,49  | 37,62 |         |                           |                          | 0,17524623 | 0,1402238  |
| 456 | 627,47  | 20,20 |         |                           |                          | 0,65914573 | 0,6548687  |
| 457 | 568,33  | 34,39 |         |                           |                          | 0,30472362 | 0,28530725 |
| 459 | 532,94  | 9,43  |         |                           |                          | 0,64704523 | 0,71322146 |
| 469 | 733,37  | 16,15 |         |                           |                          | 0,88869347 | 0,87902793 |
| 470 | 2170,39 | 17,42 |         |                           |                          | 0,24725126 | 0,16441837 |
| 473 | 618,41  | 27,64 |         |                           |                          | 0,17310553 | 0,20653142 |
| 475 | 520,39  | 15,65 |         |                           |                          | 0,05786935 | 0,11952396 |
| 476 | 703,46  | 25,85 |         |                           |                          | 0,56543719 | 0,50543957 |
| 494 | 1403,85 | 28,43 |         |                           |                          | 0,02906533 | 0,00661783 |
| 511 | 1510,83 | 16,22 | 1510,69 | <b>P60041 SMS_MOUSE</b>   | Pyro-Glu(Q)RSANSNPAMAPRE | 0,01747236 | 0,02243384 |
| 514 | 1619,95 | 15,32 | 1619,80 | <b>Q8BGU2 CBLN2_MOUSE</b> | SGSAKVAFSATRSTNH         | 0,14903015 | 0,15190926 |
| 518 | 1118,67 | 18,74 |         |                           |                          | 0,07098995 | 0,03083221 |
| 524 | 1569,98 | 25,28 |         |                           |                          | 0,07875377 | 0,09916163 |
| 526 | 627,47  | 17,01 |         |                           |                          | 0,80715578 | 0,81291351 |
| 532 | 803,59  | 18,81 |         |                           |                          | 0,34007035 | 0,37502742 |
| 542 | 1067,59 | 19,65 | 1067,49 | <b>P56388 CART_MOUSE</b>  | Pyro-Glu(Q)EDAELQPR      | 0,0439397  | 0,05617527 |
| 546 | 982,48  | 23,43 |         |                           |                          | 0,08950754 | 0,08745114 |
| 547 | 697,45  | 16,39 |         |                           |                          | 0,66460302 | 0,72017157 |
| 551 | 612,40  | 26,68 |         |                           |                          | 0,22777889 | 0,22251736 |
| 562 | 612,41  | 36,04 |         |                           |                          | 0,52413568 | 0,61491827 |
| 564 | 1636,86 | 33,46 |         | <b>P60041 SMS_MOUSE</b>   | AGCKNFFWKTFTSC           | 0,61917085 | 0,7207312  |

|     |         |       |         |                           |                                                   |            |            |
|-----|---------|-------|---------|---------------------------|---------------------------------------------------|------------|------------|
| 573 | 712,49  | 39,99 |         |                           |                                                   | 0,77274372 | 0,68313139 |
| 579 | 1453,94 | 28,71 | 1453,81 | <b>Q9QXV0 PCSK1_MOUSE</b> | ASAPLVETSTPLRL                                    | 0,32954271 | 0,24655071 |
| 584 | 1092,82 | 22,53 |         |                           |                                                   | 0,10884422 | 0,09864661 |
| 632 | 2225,31 | 27,61 | 2225,12 | <b>P47867 SCG3_MOUSE</b>  | ELSAERPLNEQIAEAEADKI                              | 0,00326633 | 0,00677922 |
| 642 | 1639,91 | 24,73 | 1639,77 | <b>O70176 PACA_MOUSE</b>  | GAGENLGGSVDDPAPLT                                 | 0,10122613 | 0,12183375 |
| 686 | 2497,30 | 27,20 | 2497,10 | <b>P22005 PENK_MOUSE</b>  | FAESLPSDEEGENYSKEVPEIE<br>APSGRMSVLKLNQSLDPSHRISD | 0,12721608 | 0,20968785 |

| ANOVA2<br>p-value<br>(perm) | ANOVA2<br>p-value (tab) | LDOPA-LESION – SAL-LESION |                   |                  | SAL-LESION – SAL-INTACT |                   |               | LDOPA-LESION– LDOPA-INTACT |                   |               |
|-----------------------------|-------------------------|---------------------------|-------------------|------------------|-------------------------|-------------------|---------------|----------------------------|-------------------|---------------|
|                             |                         | Fold change<br>(log2)     | p-value<br>(perm) | p-value<br>(tab) | Fold change<br>(log2)   | p-value<br>(perm) | p-value (tab) | Fold change<br>(log2)      | p-value<br>(perm) | p-value (tab) |
| 0,13570792                  | 0,10765966              | -0,3702717                | 0,1025724         | 0,0880848        | 0,36537012              | 0,03879286        | 0,03232818    | -0,11834032                | 0,47091071        | 0,44450748    |
| 0,82212376                  | 0,78700611              | 0,06565265                | 0,7247102         | 0,7116058        | 0,01968269              | 0,91930357        | 0,92103501    | -0,05242286                | 0,78915           | 0,79204872    |
| 0,42337129                  | 0,40059333              | -0,2258122                | 0,4483958         | 0,4359247        | 0,2548659               | 0,20273571        | 0,20919729    | 0,17001946                 | 0,38912143        | 0,39259993    |
| 0,63657426                  | 0,709408                | 0,06999768                | 0,8237703         | 0,8440307        | 0,30455354              | 0,33811786        | 0,42483985    | 0,19367693                 | 0,53936786        | 0,60861657    |
| 0,61716337                  | 0,68827397              | 0,24278067                | 0,4887067         | 0,5362192        | -0,25031894             | 0,40971071        | 0,48263624    | -0,20127358                | 0,50806071        | 0,57119442    |
| 0,97888614                  | 0,97727555              | 0,0488372                 | 0,8237809         | 0,824496         | 0,02695664              | 0,90520357        | 0,91207134    | 0,04384965                 | 0,84659643        | 0,85751174    |
| 0,88816832                  | 0,83126981              | -0,0529547                | 0,7312085         | 0,6983296        | 0,01498039              | 0,92076429        | 0,91486359    | -0,10968363                | 0,47652857        | 0,44012913    |
| 0,04790099                  | 0,05812699              | -0,5062842                | 0,0417562         | 0,043382         | 0,53699711              | 0,01561071        | 0,01837415    | 0,04886963                 | 0,80310357        | 0,80593175    |
| 0,86426238                  | 0,87983856              | 0,00233083                | 0,9932933         | 0,9936475        | 0,17210131              | 0,51656429        | 0,56355601    | 0,04135774                 | 0,87511071        | 0,88891404    |
| 0,14831683                  | 0,11010868              | 0,39849744                | 0,0433675         | 0,0328919        | 0,01315521              | 0,91313571        | 0,89734618    | 0,18025161                 | 0,15790714        | 0,09893298    |
| 0,32709901                  | 0,20524314              | 0,16619177                | 0,2130106         | 0,1465455        | -0,014478               | 0,91091071        | 0,8979165     | -0,03282818                | 0,80155357        | 0,77191939    |
| 0,22248515                  | 0,18499495              | -0,3429506                | 0,2615901         | 0,2400184        | -0,15476434             | 0,29446429        | 0,24729505    | 0,11966482                 | 0,41561071        | 0,3659921     |
| 0,72326238                  | 0,70380806              | 0,01553015                | 0,9418834         | 0,9410971        | -0,12878801             | 0,48747857        | 0,48027328    | -0,24363565                | 0,204425          | 0,19594719    |
| 0,62229208                  | 0,52597524              | 0,11141582                | 0,4918622         | 0,4401072        | 0,00515552              | 0,96529643        | 0,9594501     | -0,08378869                | 0,491925          | 0,41627286    |
| 0,51256436                  | 0,61121576              | 0,08546218                | 0,7912686         | 0,8172396        | 0,35405778              | 0,28883571        | 0,38357979    | 0,23050309                 | 0,485425          | 0,56657687    |
| 0,29963366                  | 0,26448658              | 0,28229235                | 0,1501025         | 0,1338559        | -0,01810278             | 0,90775357        | 0,90076286    | 0,06764061                 | 0,66900357        | 0,6441232     |
| 0,63338614                  | 0,56028156              | -0,0442276                | 0,8080424         | 0,7928397        | 0,18705349              | 0,29286429        | 0,27782399    | 0,09962972                 | 0,56980357        | 0,55568622    |
| 0,0030198                   | 0,00597782              | -0,1844203                | 0,3904664         | 0,3896984        | 0,50711091              | 0,027075          | 0,0340125     | 0,70742705                 | 0,00445714        | 0,00618833    |
| 0,57949505                  | 0,6295454               | -0,0291984                | 0,9156078         | 0,9215173        | 0,34278418              | 0,20915           | 0,26258329    | 0,11668516                 | 0,66000357        | 0,69565041    |
| 0,4895198                   | 0,46757976              | -0,2706293                | 0,2502014         | 0,2424705        | 0,01159137              | 0,95399643        | 0,95606694    | -0,28739817                | 0,177825          | 0,18985171    |
| 0,06356931                  | 0,08783183              | -0,0224452                | 0,9283498         | 0,9285451        | 0,23853966              | 0,29247857        | 0,31731513    | 0,5725707                  | 0,02197857        | 0,028886      |
| 0,01646535                  | 0,02044061              | 0,87895028                | 0,0062544         | 0,0069814        | 0,00670541              | 0,96885714        | 0,96801499    | 0,49051751                 | 0,01432857        | 0,01226388    |
| 0,71188119                  | 0,58872809              | -0,0208117                | 0,9037102         | 0,8918971        | 0,01748874              | 0,88888214        | 0,87091457    | -0,1435182                 | 0,26750714        | 0,20013348    |
| 0,12492079                  | 0,09826074              | 0,43482165                | 0,0331555         | 0,0258969        | -0,00376663             | 0,97650357        | 0,9731126     | 0,20086117                 | 0,142925          | 0,09413329    |
| 0,12818317                  | 0,12745711              | -0,1376538                | 0,4840318         | 0,4685967        | -0,33599435             | 0,04989286        | 0,03879535    | -0,29395793                | 0,08399643        | 0,06549417    |
| 0,26923762                  | 0,31739599              | 0,08757567                | 0,7803993         | 0,784505         | -0,42620458             | 0,09911071        | 0,13241996    | -0,27052479                | 0,28061429        | 0,32444932    |
| 0,67164851                  | 0,56299279              | -0,0191455                | 0,9130636         | 0,9028952        | 0,09295145              | 0,48436071        | 0,42669848    | -0,11699882                | 0,38471071        | 0,32137152    |
| 0,08175248                  | 0,10876926              | 0,10793696                | 0,6975265         | 0,6991506        | -0,50817972             | 0,03860714        | 0,05278911    | -0,34840932                | 0,14115           | 0,16493352    |
| 0,29784158                  | 0,20025181              | -0,07141                  | 0,6095972         | 0,5551447        | 0,10408522              | 0,48208214        | 0,44299313    | 0,18970792                 | 0,21301786        | 0,17485436    |
| 0,05272277                  | 0,0474315               | -0,2363819                | 0,2552226         | 0,2284504        | 0,50961319              | 0,00994643        | 0,00861346    | 0,02569901                 | 0,88056786        | 0,87542077    |
| 0,0254703                   | 0,02347431              | 0,59335429                | 0,008364          | 0,0074682        | -0,07513774             | 0,63680714        | 0,6140592     | 0,43799824                 | 0,01606429        | 0,01166695    |
| 0,00872772                  | 0,02205946              | -0,2420024                | 0,3397314         | 0,3653986        | 0,68037406              | 0,01734643        | 0,03149576    | 0,62920463                 | 0,02646786        | 0,0436888     |
| 0,90382178                  | 0,8674253               | -0,0384485                | 0,8133286         | 0,7944389        | 0,05441909              | 0,729575          | 0,71241564    | 0,08921096                 | 0,57660357        | 0,54839578    |
| 0,04911881                  | 0,05488231              | 0,6291552                 | 0,0136961         | 0,0147242        | -0,0238321              | 0,89512857        | 0,89306554    | 0,42330477                 | 0,03556071        | 0,03299191    |
| 0,08838119                  | 0,0548556               | 0,27614006                | 0,0636113         | 0,0399722        | -0,08992998             | 0,50655357        | 0,45054887    | -0,06386009                | 0,63685357        | 0,5905263     |
| 0,35628713                  | 0,26943456              | -0,0693784                | 0,702742          | 0,6766717        | -0,15100062             | 0,31876429        | 0,27738099    | -0,23692655                | 0,13022143        | 0,10057506    |
| 0,14634158                  | 0,1706334               | -0,0020816                | 0,9934912         | 0,993394         | -0,33175322             | 0,16316071        | 0,1945651     | -0,40007918                | 0,10063214        | 0,12391872    |
| 0,96030198                  | 0,92647928              | 0,05074941                | 0,7244488         | 0,6844324        | -0,07824324             | 0,52297857        | 0,45510523    | 0,01295985                 | 0,91518929        | 0,90027177    |
| 0,06474257                  | 0,0527804               | -0,1229681                | 0,5044028         | 0,4692437        | -0,20438242             | 0,21176071        | 0,1860202     | -0,42165158                | 0,019175          | 0,0142016     |
| 0,81138119                  | 0,68043855              | 0,0191792                 | 0,887583          | 0,8675422        | -0,11381936             | 0,32308571        | 0,23570618    | -0,02613609                | 0,81658214        | 0,77894237    |
| 0,77865842                  | 0,68498235              | 0,15477018                | 0,3576996         | 0,3051513        | -0,03171351             | 0,81458571        | 0,78969562    | 0,11744483                 | 0,39561429        | 0,3345096     |

| SAL-INTACT1 | SAL-INTACT2 |
|-------------|-------------|
| Int (log2)  | Int (log2)  |
| 4           | 2           |
| 10,67889    | 10,24953    |
| 4,217481    | 3,641342    |
| 5,960014    | 4,812877    |
| 6,272511    | 6,423089    |
| 4,042425    | 3,504575    |
| 3,516277    | 2,937191    |
| 7,152033    | 6,367252    |
| 3,71339     | 3,180251    |
| 10,36508    | 10,47703    |
| 8,993769    | 8,403837    |
| 4,816308    | 5,419691    |
| 10,15596    | 11,5162     |
| 5,241953    | 5,280756    |
| 12,25671    | 12,30288    |
| 4,571607    | 4,873981    |
| 7,397555    | 6,786334    |
| 5,361114    | 4,577804    |
| 4,32086     | 4,370009    |
| 2,891566    | 2,690027    |
| 6,845604    | 6,70217     |
| 5,109467    | 5,585629    |
| 5,28067     | 4,755176    |
| 12,93811    | 13,12958    |
| 9,003571    | 8,520351    |
| 6,963133    | 7,149534    |
| 5,004616    | 4,039234    |
| 12,51779    | 12,58732    |
| 4,78943     | 4,332952    |
| 4,315965    | 4,46735     |
| 5,557658    | 5,576683    |
| 4,313103    | 3,894439    |
| 5,484553    | 5,031035    |
| 6,625396    | 6,016392    |
| 5,590179    | 4,85584     |
| 5,60875     | 5,622905    |
| 6,158635    | 5,592497    |
| 5,083427    | 4,644399    |
| 6,316713    | 6,636272    |
| 6,983509    | 6,686618    |
| 7,571043    | 7,830936    |
| 12,00661    | 12,25746    |



|            |            |            |           |           |             |            |            |             |            |            |          |          |
|------------|------------|------------|-----------|-----------|-------------|------------|------------|-------------|------------|------------|----------|----------|
| 0,0814802  | 0,14695437 | -0,1743367 | 0,5484594 | 0,5862539 | 0,37510618  | 0,13014643 | 0,15894079 | 0,64993326  | 0,01628929 | 0,02421266 | 5,817924 | 5,603258 |
| 0,14840099 | 0,12052001 | -0,179621  | 0,3263922 | 0,2868626 | -0,18532224 | 0,26117143 | 0,2360065  | 0,05775298  | 0,719025   | 0,70352309 | 10,22583 | 10,67055 |
| 0,26888119 | 0,26304076 | 0,4122264  | 0,1898728 | 0,1859685 | 0,16027228  | 0,41954643 | 0,42723226 | -0,02423356 | 0,90155    | 0,90304952 | 7,301949 | 7,399276 |
| 0,59911386 | 0,57706976 | 0,35544493 | 0,2177597 | 0,2167951 | -0,08358812 | 0,68001786 | 0,68776014 | -0,00646507 | 0,97447857 | 0,9751376  | 6,670423 | 6,745031 |
| 0,44067822 | 0,33220073 | 0,21418333 | 0,133576  | 0,0892634 | -0,05743627 | 0,61443571 | 0,54487555 | 0,01982676  | 0,86144286 | 0,83343023 | 3,883897 | 4,167069 |
| 0,01367822 | 0,017332   | 0,62522231 | 0,0100318 | 0,0104116 | 0,16067492  | 0,39446429 | 0,38970434 | 0,39154661  | 0,05386786 | 0,0520205  | 4,992097 | 4,737332 |
| 0,01214356 | 0,01689796 | 0,73795855 | 0,0026855 | 0,0032927 | -0,13819891 | 0,44526071 | 0,43391826 | 0,49921151  | 0,01517857 | 0,01378931 | 5,730569 | 5,31657  |
| 0,06633663 | 0,07139685 | 0,57826994 | 0,0253675 | 0,0258885 | 0,08183561  | 0,66675    | 0,66680702 | 0,20059356  | 0,304525   | 0,30214902 | 4,358943 | 3,959328 |
| 0,3909802  | 0,34773553 | 0,23282705 | 0,264735  | 0,2442983 | -0,09557442 | 0,60055    | 0,59707536 | 0,3044773   | 0,11453571 | 0,11079632 | 4,358162 | 5,115493 |
| 0,24623267 | 0,18187736 | 0,24322463 | 0,1404346 | 0,1075858 | -0,23123249 | 0,13299286 | 0,10415334 | -0,07476256 | 0,61344286 | 0,57844077 | 4,475008 | 4,744483 |
| 0,15307921 | 0,10452479 | 0,26299396 | 0,092788  | 0,0648385 | 0,01301979  | 0,93110357 | 0,92566877 | 0,0369335   | 0,80792857 | 0,79174382 | 3,367882 | 3,771638 |
| 0,12342574 | 0,11648844 | 0,50506079 | 0,0244205 | 0,0237608 | -0,1487716  | 0,40399643 | 0,39057161 | 0,33119402  | 0,079975   | 0,07233707 | 5,942132 | 5,58864  |
| 0,22811386 | 0,22423243 | -0,2589943 | 0,2323463 | 0,2255508 | -0,07815856 | 0,6925     | 0,69895999 | -0,40654278 | 0,05835    | 0,06331553 | 6,238171 | 6,499533 |
| 0,88812376 | 0,90898267 | 0,20638202 | 0,4933675 | 0,5383701 | -0,1738292  | 0,52922143 | 0,58056381 | 0,20991504  | 0,45259643 | 0,50663512 | 3,677292 | 3,145571 |
| 0,50180693 | 0,35039521 | 0,20212439 | 0,1534594 | 0,1072068 | -0,10626713 | 0,30655    | 0,20529296 | 0,04011085  | 0,69375714 | 0,62149553 | 10,32708 | 10,67355 |
| 0,80172277 | 0,72582002 | 0,04988128 | 0,7459364 | 0,7159803 | -0,10071247 | 0,47806429 | 0,43028466 | 0,08744567  | 0,53952143 | 0,49224902 | 4,156912 | 4,684544 |
| 0,05852475 | 0,07865844 | -0,4320151 | 0,0610989 | 0,0689204 | 0,53028217  | 0,028825   | 0,03930439 | 0,13485309  | 0,54326786 | 0,56414935 | 5,452816 | 5,604557 |
| 0,00056436 | 0,00033545 | 0,02840304 | 0,9098657 | 0,9054934 | 0,88399022  | 0,00021786 | 0,00021011 | -0,47158605 | 0,01673214 | 0,01467004 | 4,889422 | 5,894044 |
| 0,06463366 | 0,04373734 | -0,1216949 | 0,4642933 | 0,4127859 | -0,23053085 | 0,09541071 | 0,06085388 | 0,09034977  | 0,49469286 | 0,43140185 | 9,210398 | 9,663166 |
| 0,4085     | 0,31817177 | 0,28553253 | 0,1055618 | 0,0787234 | -0,06119331 | 0,64675714 | 0,60262549 | 0,14365879  | 0,29525    | 0,23494612 | 7,869268 | 7,714811 |
| 0,09975743 | 0,32249447 | 0,90460586 | 0,1638375 | 0,275204  | -1,31659968 | 0,02407857 | 0,10384288 | 0,55123372  | 0,30544286 | 0,47346004 | 8,159153 | 8,506725 |
| 0,00482178 | 0,0026981  | 0,09921731 | 0,509318  | 0,4530568 | 0,31966513  | 0,01175    | 0,00408295 | -0,17729334 | 0,12906071 | 0,07049959 | 8,035753 | 8,271903 |
| 0,09788119 | 0,07195359 | 0,18302704 | 0,2472721 | 0,2016212 | 0,15517428  | 0,35065714 | 0,32702671 | 0,36326222  | 0,04282143 | 0,03514951 | 7,351836 | 7,18759  |
| 0,47207921 | 0,37359868 | -0,1204919 | 0,4397208 | 0,387758  | -0,11033587 | 0,44751429 | 0,40020372 | -0,07819565 | 0,59032857 | 0,54867779 | 5,191114 | 5,445738 |
| 0,11646535 | 0,1205962  | -0,3286218 | 0,1092473 | 0,1051253 | 0,44229125  | 0,04230357 | 0,04860103 | 0,09398989  | 0,63951071 | 0,64672239 | 4,41647  | 4,392891 |
| 0,17963366 | 0,31097978 | -0,1338657 | 0,7687173 | 0,791033  | 0,77077888  | 0,04176786 | 0,09746653 | -0,0781685  | 0,82151429 | 0,85760019 | 8,331023 | 4,287083 |
| 0,62191089 | 0,55307076 | -0,1814044 | 0,3050671 | 0,27136   | -0,03529264 | 0,82746071 | 0,81689406 | -0,16549429 | 0,32133214 | 0,29101424 | 9,689198 | 9,754312 |
| 0,04693564 | 0,08445472 | 0,89193017 | 0,0092403 | 0,0170742 | -0,16996206 | 0,52934286 | 0,5775743  | 0,56485924  | 0,05402857 | 0,0833625  | 4,099355 | 4,030986 |
| 0,07822277 | 0,06608372 | 0,47008864 | 0,0498905 | 0,0441495 | -0,21794871 | 0,19190714 | 0,168175   | 0,41213948  | 0,02346786 | 0,0177881  | 5,699098 | 5,232627 |
| 0,22348515 | 0,22565639 | -0,1728305 | 0,4069223 | 0,400835  | 0,43640845  | 0,05889286 | 0,07239341 | 0,08288771  | 0,69924286 | 0,71305637 | 4,078273 | 3,603505 |
| 0,35736139 | 0,31404492 | 0,30997755 | 0,163583  | 0,1479031 | -0,28880556 | 0,09491786 | 0,07973472 | 0,07027096  | 0,66821786 | 0,64861944 | 8,876906 | 8,558662 |
| 0,17672772 | 0,167888   | 0,44630656 | 0,0382155 | 0,037569  | -0,31146103 | 0,11501071 | 0,11286944 | 0,16120179  | 0,39970357 | 0,39301962 | 4,349274 | 4,849216 |
| 0,16685149 | 0,15045555 | 0,39814828 | 0,100417  | 0,0916328 | -0,38186277 | 0,04023214 | 0,03532954 | 0,10054726  | 0,559575   | 0,54128294 | 6,825322 | 6,393649 |
| 0,25510396 | 0,34042803 | 0,37039015 | 0,2128481 | 0,2596599 | 0,02136369  | 0,94044643 | 0,94922976 | -0,08755088 | 0,76341786 | 0,79497429 | 7,369986 | 8,311817 |
| 0,11234158 | 0,09382192 | 0,45267271 | 0,0352721 | 0,0300288 | -0,05325855 | 0,72956786 | 0,70967456 | 0,34751285  | 0,041525   | 0,03020382 | 7,716722 | 7,521064 |
| 0,41093069 | 0,39877784 | 0,35037049 | 0,1236219 | 0,1232109 | -0,24863769 | 0,22016786 | 0,22462391 | 0,19712466  | 0,32935    | 0,33100966 | 4,241478 | 4,639529 |
| 0,18863861 | 0,22975526 | 0,52067154 | 0,0599152 | 0,0772968 | -0,15235375 | 0,48793214 | 0,50885158 | 0,03657108  | 0,86643929 | 0,872905   | 8,241146 | 7,522615 |
| 0,98459406 | 0,9772811  | 0,00994717 | 0,9569647 | 0,9526432 | 0,05027543  | 0,74753929 | 0,73181144 | 0,00931     | 0,95236071 | 0,94926127 | 8,600906 | 7,762139 |
| 0,35073762 | 0,3016548  | -0,1557448 | 0,4369823 | 0,4101482 | -0,09251756 | 0,59133929 | 0,57679729 | -0,30951073 | 0,09226071 | 0,08105919 | 5,648187 | 6,099356 |
| 0,00475743 | 0,00873165 | 0,03294183 | 0,8947597 | 0,8926919 | -0,04525935 | 0,83272857 | 0,84119647 | 0,79493588  | 0,00263929 | 0,0041453  | 3,510528 | 2,946033 |
| 0,25186634 | 0,22029081 | 0,33399799 | 0,1096078 | 0,0973031 | -0,11885729 | 0,479175   | 0,45841438 | 0,35658111  | 0,05025714 | 0,04180449 | 9,768848 | 9,716982 |
| 0,24081188 | 0,18410812 | 0,33070911 | 0,144     | 0,1236815 | -0,29683531 | 0,05845    | 0,04039501 | 0,10881157  | 0,46283571 | 0,41434411 | 7,280948 | 7,079463 |
| 0,4035297  | 0,31690571 | 0,24867511 | 0,122735  | 0,0882542 | -0,03880343 | 0,73005357 | 0,67730863 | 0,06992794  | 0,54116786 | 0,45827964 | 10,06751 | 9,937358 |
| 0,83570792 | 0,8145203  | -0,196193  | 0,3675654 | 0,3585107 | 0,06187356  | 0,76616071 | 0,77539517 | -0,08391423 | 0,68796786 | 0,69924217 | 5,511272 | 6,258784 |
| 0,14744554 | 0,14735601 | 0,09350277 | 0,7236572 | 0,7153293 | -0,30837452 | 0,13033929 | 0,13490866 | -0,34073787 | 0,09983929 | 0,10230321 | 12,46993 | 11,84318 |
| 0,37378713 | 0,29798063 | 0,21811379 | 0,2224417 | 0,1886731 | -0,0756409  | 0,63353214 | 0,61262359 | 0,2728503   | 0,10533214 | 0,08687843 | 7,672593 | 7,124824 |
| 0,0494901  | 0,05900283 | 0,03058146 | 0,8973357 | 0,8939304 | -0,43853981 | 0,04421071 | 0,04974203 | -0,42637876 | 0,05137857 | 0,05549782 | 6,08992  | 5,892129 |

|            |            |            |           |           |             |            |            |             |            |            |          |          |
|------------|------------|------------|-----------|-----------|-------------|------------|------------|-------------|------------|------------|----------|----------|
| 0,03725743 | 0,0227943  | -0,3152017 | 0,0326961 | 0,0194391 | 0,23996441  | 0,11453929 | 0,08635472 | 0,10388039  | 0,47728214 | 0,43221164 | 5,891783 | 5,729762 |
| 0,66024257 | 0,59046278 | 0,06404358 | 0,7424346 | 0,7248252 | -0,16467059 | 0,33577143 | 0,31663197 | -0,12791461 | 0,452925   | 0,43239841 | 5,191486 | 4,667264 |
| 0,25741089 | 0,20759938 | 0,36461291 | 0,082682  | 0,0685856 | -0,04841625 | 0,74286429 | 0,71962241 | 0,27237604  | 0,08667143 | 0,06294111 | 10,22356 | 9,991782 |
| 0,05266832 | 0,0825377  | 0,35873921 | 0,152417  | 0,1714615 | 0,00559542  | 0,98152143 | 0,98340964 | -0,27561108 | 0,27633929 | 0,31765759 | 7,993357 | 8,756486 |
| 0,14005446 | 0,14882907 | 0,01165358 | 0,9706325 | 0,9695792 | -0,26672575 | 0,20037857 | 0,21305351 | -0,41876703 | 0,05600357 | 0,06219938 | 10,9817  | 9,905613 |
| 0,09013366 | 0,05638329 | 0,08526311 | 0,5606042 | 0,5028808 | 0,0978265   | 0,46407143 | 0,40444116 | -0,17807582 | 0,19682143 | 0,1434897  | 4,511691 | 5,224837 |
| 0,00087624 | 0,00070042 | -0,0693085 | 0,7323675 | 0,7154527 | 0,83046579  | 9,64E-05   | 5,39E-05   | -0,14906174 | 0,32379643 | 0,27854858 | 5,986194 | 6,632008 |
| 0,19982178 | 0,19249671 | 0,09401593 | 0,7210177 | 0,7123931 | -0,26837369 | 0,17631071 | 0,17930614 | -0,32682148 | 0,10810714 | 0,1087036  | 11,86614 | 11,26506 |
| 0,27941089 | 0,25804095 | 0,59585098 | 0,1089541 | 0,1030298 | -0,26249054 | 0,17006429 | 0,16531888 | 0,2024982   | 0,28633571 | 0,27735575 | 4,678702 | 4,977018 |
| 0,39333663 | 0,43662167 | 0,24623918 | 0,4335159 | 0,4451118 | -0,44227739 | 0,08093214 | 0,10617525 | -0,05684976 | 0,81108214 | 0,82532493 | 6,635126 | 5,366214 |
| 0,07752475 | 0,07366786 | -0,2452338 | 0,1885654 | 0,168801  | 0,15139672  | 0,40106786 | 0,39219294 | 0,24700535  | 0,18290357 | 0,17413016 | 7,283663 | 7,739969 |
| 0,32577723 | 0,59236564 | 0,18218369 | 0,7479046 | 0,8163453 | -0,2459669  | 0,56536786 | 0,66664489 | 1,06899921  | 0,02563214 | 0,08147158 | 11,54026 | 12,28933 |
| 0,18230198 | 0,13035255 | 0,29917265 | 0,0523392 | 0,0337998 | -0,0805236  | 0,4648     | 0,37215153 | -0,01732164 | 0,87381429 | 0,84543181 | 4,461707 | 4,781477 |
| 0,32052475 | 0,46151104 | 0,18370325 | 0,5978587 | 0,6551209 | -0,34137378 | 0,22582857 | 0,28491224 | 0,56683814  | 0,05724643 | 0,08944644 | 9,733435 | 9,366851 |
| 0,62980198 | 0,63880609 | 0,02786722 | 0,9231519 | 0,9238434 | -0,10782632 | 0,58971429 | 0,59449994 | 0,31038245  | 0,14045714 | 0,14385437 | 15,14733 | 15,25025 |
| 0,51005941 | 0,59320514 | 0,11631081 | 0,7217986 | 0,7486617 | -0,21011562 | 0,40751071 | 0,45086287 | 0,44651969  | 0,09564286 | 0,12571977 | 10,81285 | 10,89575 |
| 0,00155446 | 0,00042947 | -0,0251583 | 0,8458869 | 0,81827   | 0,08518894  | 0,40248929 | 0,29297441 | 0,4657231   | 0,00053214 | 8,6678E-05 | 4,675704 | 4,714777 |
| 0,59433168 | 0,7120086  | 0,50990363 | 0,1878269 | 0,2732101 | -0,26038238 | 0,37501786 | 0,44231359 | 0,52079056  | 0,09276786 | 0,14048592 | 7,609162 | 7,909057 |
| 0,77587129 | 0,72377455 | -0,0010364 | 0,9953145 | 0,9949317 | 0,05168246  | 0,77362857 | 0,77077044 | 0,15957436  | 0,38516071 | 0,37624748 | 6,966557 | 7,290581 |
| 0,04693564 | 0,02855568 | -0,2684005 | 0,0677173 | 0,0417178 | 0,28253138  | 0,06697857 | 0,04641609 | 0,15271718  | 0,30172143 | 0,25184993 | 6,172578 | 5,773561 |
| 0,23305446 | 0,16693456 | 0,21761544 | 0,1624876 | 0,1233884 | 0,00838806  | 0,94705714 | 0,93955602 | -0,01022477 | 0,93656071 | 0,92645587 | 5,065662 | 5,651518 |
| 0,81665347 | 0,84656028 | 0,15731192 | 0,6274664 | 0,6541236 | -0,26824959 | 0,26935    | 0,30427771 | 0,20483774  | 0,39684286 | 0,4292101  | 10,5494  | 10,61436 |
| 0,01513861 | 0,04683838 | 0,64264415 | 0,0477491 | 0,0808144 | 0,10403069  | 0,72024286 | 0,75936163 | -0,12709965 | 0,66454643 | 0,70907752 | 4,369479 | 5,171168 |
| 0,11110396 | 0,12725748 | 0,45256326 | 0,0702544 | 0,0746847 | -0,34351007 | 0,10498571 | 0,11239374 | -0,15498043 | 0,44716071 | 0,45304144 | 7,002837 | 6,639754 |
| 0,27182178 | 0,38697228 | 0,44700908 | 0,2061731 | 0,2589039 | -0,191152   | 0,50004286 | 0,55871235 | 0,62707711  | 0,04251071 | 0,07356047 | 7,147069 | 7,075124 |
| 0,26139604 | 0,23588657 | -0,1668761 | 0,4183993 | 0,3978794 | 0,3676124   | 0,07209643 | 0,07570571 | 0,09278114  | 0,62897143 | 0,63041126 | 3,547529 | 3,002177 |
| 0,02021287 | 0,02055832 | 0,2306223  | 0,3093322 | 0,283884  | -0,13831027 | 0,39774286 | 0,36777135 | 0,61699078  | 0,002125   | 0,00154559 | 7,865972 | 8,375046 |
| 0,07899505 | 0,07692465 | 0,53832084 | 0,0349647 | 0,0334777 | -0,07459472 | 0,65023214 | 0,63196661 | 0,47228105  | 0,01281429 | 0,00990218 | 7,496161 | 7,220813 |
| 0,10564356 | 0,14989033 | 0,02607441 | 0,9317314 | 0,9328506 | -0,44166939 | 0,08649286 | 0,11661736 | -0,4666457  | 0,07395714 | 0,09944419 | 5,571242 | 5,258785 |
| 0,20195545 | 0,21804578 | 0,53459289 | 0,0452615 | 0,0524313 | -0,25958544 | 0,22249286 | 0,23930619 | 0,08101282  | 0,69509643 | 0,70521953 | 5,708096 | 5,308802 |
| 0,22176733 | 0,17643877 | 0,33168768 | 0,0734594 | 0,0544755 | 0,0142638   | 0,90237857 | 0,88320856 | 0,07825975  | 0,51084286 | 0,42863316 | 6,572767 | 6,389925 |
| 0,06409406 | 0,04939589 | 0,35628386 | 0,036689  | 0,0263311 | 0,07818189  | 0,59843929 | 0,56621039 | 0,16497319  | 0,27836786 | 0,23797298 | 7,5073   | 7,728556 |
| 0,32573762 | 0,28572687 | -0,2287772 | 0,2724311 | 0,2498407 | 0,29394771  | 0,13081429 | 0,13077292 | 0,09809241  | 0,59961786 | 0,59670399 | 3,335753 | 2,396857 |
| 0,0005396  | 9,32E-05   | 0,17648123 | 0,258159  | 0,2037421 | -0,03783094 | 0,75607143 | 0,71655134 | 0,76240262  | 3,57E-05   | 1,19E-05   | 4,088975 | 4,068977 |
| 0,16126238 | 0,10918367 | 0,27725184 | 0,0743887 | 0,0507065 | -0,03076383 | 0,82969643 | 0,81191556 | 0,32086208  | 0,04175357 | 0,02742429 | 6,919116 | 7,024501 |
| 0,53323762 | 0,48549914 | 0,25405907 | 0,2272297 | 0,2095355 | -0,21784619 | 0,19396429 | 0,17195069 | -0,02491974 | 0,877675   | 0,87040633 | 7,487235 | 7,065155 |
| 0,08909901 | 0,03841105 | 0,34922049 | 0,0254205 | 0,017126  | -0,10475215 | 0,2614     | 0,14968897 | 0,18147228  | 0,06486429 | 0,02136451 | 7,893277 | 7,559124 |
| 0,26134158 | 0,20664766 | 0,32185581 | 0,0984629 | 0,0796354 | -0,25654145 | 0,12147857 | 0,10051121 | 0,00990455  | 0,94970714 | 0,94611574 | 9,321932 | 8,77234  |
| 0,14914851 | 0,09232113 | 0,18541183 | 0,183364  | 0,1267225 | 0,11839283  | 0,33166786 | 0,25315659 | 0,02967746  | 0,804175   | 0,76845634 | 4,095026 | 4,52807  |
| 0,84733663 | 0,84063399 | 0,03079206 | 0,9125936 | 0,9117264 | -0,17987865 | 0,395      | 0,41318061 | 0,04239991  | 0,83838214 | 0,84476885 | 9,346684 | 9,120853 |
| 0,68433663 | 0,60195822 | 0,20993627 | 0,2812261 | 0,2447861 | -0,14862106 | 0,31441071 | 0,26825721 | 0,04502593  | 0,75599643 | 0,73082015 | 5,851682 | 5,842247 |
| 0,45644554 | 0,43587826 | -0,0990128 | 0,6344629 | 0,6270391 | 0,2287807   | 0,28327857 | 0,30099166 | 0,22448654  | 0,29354286 | 0,30971598 | 5,363596 | 5,36761  |
| 0,52085149 | 0,47058384 | -0,1854189 | 0,3214735 | 0,29768   | 0,22233067  | 0,24291429 | 0,24138871 | 0,06682252  | 0,717875   | 0,71683643 | 8,35852  | 8,075767 |
| 0,20594554 | 0,17906433 | -0,170674  | 0,3458728 | 0,3180801 | 0,21609856  | 0,25833214 | 0,25741727 | 0,22208242  | 0,24761429 | 0,24524192 | 8,845665 | 8,621696 |
| 0,09406931 | 0,12031541 | 0,46115156 | 0,1541696 | 0,1570228 | -0,1306962  | 0,54103571 | 0,55495382 | 0,63967287  | 0,00982857 | 0,01279246 | 10,22255 | 10,67359 |
| 0,04792574 | 0,10932686 | 0,75992416 | 0,0205018 | 0,0423328 | -0,02771128 | 0,92037143 | 0,93139475 | 0,2319484   | 0,41511786 | 0,47647777 | 5,458954 | 4,121989 |
| 0,18665347 | 0,1514198  | -0,3334019 | 0,0603852 | 0,0490834 | 0,28223769  | 0,12237857 | 0,11413623 | -0,01917091 | 0,91208214 | 0,90930558 | 8,17559  | 7,95388  |

|            |            |            |           |           |             |            |            |             |            |            |           |           |
|------------|------------|------------|-----------|-----------|-------------|------------|------------|-------------|------------|------------|-----------|-----------|
| 0,23440594 | 0,23386367 | 0,11206061 | 0,6356784 | 0,629049  | -0,26225959 | 0,19278571 | 0,19860589 | -0,3219484  | 0,11845    | 0,12135376 | 8,239404  | 7,42657   |
| 0,75738614 | 0,7053626  | 0,12386593 | 0,5222509 | 0,4958865 | -0,12777417 | 0,46878571 | 0,45487611 | -0,07931048 | 0,65190714 | 0,64052338 | 3,761309  | 4,31116   |
| 0,0999604  | 0,0884407  | 0,11343315 | 0,6583216 | 0,6423105 | -0,32467738 | 0,07886786 | 0,07179985 | -0,31475812 | 0,08986071 | 0,07992527 | 11,4592   | 10,98131  |
| 0,05907426 | 0,0683213  | -0,3260127 | 0,2303534 | 0,2215713 | -0,00542005 | 0,97765    | 0,97840051 | -0,57943795 | 0,01094286 | 0,01295433 | 5,880588  | 5,622431  |
| 0,01261386 | 0,01048774 | -0,2810289 | 0,119894  | 0,092291  | -0,32094578 | 0,03590714 | 0,02323895 | -0,05866065 | 0,67496071 | 0,63964176 | 12,02051  | 12,28652  |
| 0,33488614 | 0,27199849 | 0,33647647 | 0,0859753 | 0,0699776 | -0,12328256 | 0,413575   | 0,37131695 | 0,2373108   | 0,13148929 | 0,10091698 | 9,399787  | 9,469802  |
| 0,03648515 | 0,04485398 | -0,1080825 | 0,5877703 | 0,5786548 | 0,48301553  | 0,03086786 | 0,03700194 | 0,39799387  | 0,06912857 | 0,07650094 | 7,353659  | 7,360592  |
| 0,21886139 | 0,30978757 | 0,55308999 | 0,0723251 | 0,1087285 | -0,26681764 | 0,27325    | 0,30907644 | 0,64435282  | 0,01743571 | 0,02603983 | 6,588395  | 6,386834  |
| 0,4494505  | 0,59952291 | 0,56888728 | 0,1493322 | 0,2335819 | -0,16813223 | 0,65611786 | 0,73161415 | 0,54874113  | 0,16498214 | 0,27521173 | 4,635198  | 5,053146  |
| 0,17739604 | 0,15873967 | 0,00024782 | 0,9991696 | 0,9991134 | -0,10924246 | 0,54545357 | 0,53880526 | -0,36964191 | 0,05820714 | 0,05500196 | 6,234972  | 5,557894  |
| 0,88768317 | 0,8427032  | 0,0958585  | 0,5586254 | 0,5183881 | 0,01027205  | 0,94713929 | 0,94422628 | 0,10766699  | 0,499025   | 0,46887794 | 5,535054  | 4,721722  |
| 0,29543564 | 0,24594886 | -0,21473   | 0,2238021 | 0,1946753 | 0,25796867  | 0,15317857 | 0,14338831 | 0,11087519  | 0,527275   | 0,51228154 | 6,241721  | 5,900208  |
| 0,34282178 | 0,4638804  | 0,03823526 | 0,9113039 | 0,9225047 | 0,15522594  | 0,62579643 | 0,68745223 | -0,42138173 | 0,20256071 | 0,28601664 | 7,123469  | 6,782063  |
| 0,1060099  | 0,11425753 | 0,10315421 | 0,7184594 | 0,7113251 | -0,3397399  | 0,10963929 | 0,11759915 | -0,38223881 | 0,07728214 | 0,08268327 | 10,92053  | 10,12034  |
| 0,04427228 | 0,04616323 | 0,04391582 | 0,8121873 | 0,8019778 | 0,12617624  | 0,49672143 | 0,49303639 | -0,34793908 | 0,07883214 | 0,07646972 | 3,389953  | 3,673626  |
| 0,28323267 | 0,4351489  | 0,56979697 | 0,1350848 | 0,2107926 | -0,35629956 | 0,270375   | 0,35384085 | 0,69598735  | 0,04457143 | 0,08592652 | 7,115043  | 7,024004  |
| 0,16475248 | 0,18272352 | -0,3428182 | 0,2368905 | 0,23539   | 0,41698574  | 0,06461071 | 0,07520742 | -0,31237015 | 0,15632143 | 0,16933553 | 4,769748  | 4,824333  |
| 0,8624505  | 0,80740399 | -0,1242134 | 0,4587208 | 0,4106473 | -0,01031327 | 0,94591071 | 0,94206832 | -0,06669295 | 0,66705357 | 0,64089154 | 9,582831  | 8,946297  |
| 0,20361386 | 0,24534022 | 0,44965133 | 0,123636  | 0,1403923 | -0,47591214 | 0,07404643 | 0,10381874 | -0,04701084 | 0,84983214 | 0,86420488 | 7,882303  | 7,435652  |
| 0,31931188 | 0,30074873 | 0,13668479 | 0,4889258 | 0,4756233 | 0,09891405  | 0,63181786 | 0,64426326 | 0,36490127  | 0,09723214 | 0,10768661 | 5,125895  | 4,906398  |
| 0,18665347 | 0,21085162 | 0,69194341 | 0,0375124 | 0,0474052 | -0,11123487 | 0,64288571 | 0,67242539 | 0,20300638  | 0,40574643 | 0,44470482 | 6,202557  | 4,960016  |
| 0,46875248 | 0,36469519 | 0,0387115  | 0,7955053 | 0,7695587 | 0,07321456  | 0,60597857 | 0,56702257 | 0,21677695  | 0,14585714 | 0,10851793 | 5,991938  | 6,091845  |
| 0,0059505  | 0,04026783 | 0,30338888 | 0,4525124 | 0,5395706 | 0,37853434  | 0,29976429 | 0,40622284 | 1,55940969  | 0,00086071 | 0,00449886 | 5,954404  | 5,576184  |
| 0,56070792 | 0,45451034 | 0,18606942 | 0,2626572 | 0,2125214 | 0,02740827  | 0,838525   | 0,81647396 | 0,11392282  | 0,40823571 | 0,3458645  | 6,545629  | 6,775617  |
| 0,36955446 | 0,34136486 | 0,02627346 | 0,901258  | 0,8968093 | 0,20237689  | 0,31740357 | 0,3261513  | -0,08681766 | 0,66205357 | 0,66784718 | 6,054801  | 5,315664  |
| 0,92444059 | 0,90421832 | 0,07541905 | 0,6769364 | 0,6587508 | 0,00256638  | 0,98886786 | 0,98901167 | 0,1410156   | 0,457725   | 0,45517485 | 4,261765  | 3,713283  |
| 0,00089109 | 0,00095656 | 0,39205227 | 0,0901413 | 0,0848967 | 0,0172511   | 0,92272143 | 0,92211429 | 1,04770113  | 5,71E-05   | 8,01E-05   | 6,848213  | 7,547906  |
| 0,65520792 | 0,51003358 | -0,1223159 | 0,4650954 | 0,4135893 | 0,15037254  | 0,26557857 | 0,20451568 | -0,07013269 | 0,59803571 | 0,54347184 | 3,723068  | 4,086657  |
| 0,49522772 | 0,38601928 | 0,08463721 | 0,7016184 | 0,6803622 | -0,0029284  | 0,98393214 | 0,98259381 | 0,23919031  | 0,128575   | 0,09674485 | 6,971542  | 6,770733  |
| 0,30013861 | 0,39066595 | 0,30365088 | 0,3717597 | 0,4079367 | -0,06982227 | 0,80298929 | 0,82827889 | 0,5774526   | 0,05824286 | 0,09375942 | 5,036831  | 5,653168  |
| 0,01878218 | 0,0250619  | -0,2954255 | 0,2751272 | 0,2636688 | -0,45157845 | 0,03864643 | 0,04286527 | 0,11812679  | 0,55914286 | 0,56259523 | 7,821143  | 8,097971  |
| 0,49665347 | 0,44852663 | -0,2134435 | 0,271735  | 0,2502169 | 0,16489264  | 0,38412857 | 0,37948536 | -0,198923   | 0,30004286 | 0,29374984 | 7,012759  | 6,377738  |
| 0,11009901 | 0,19480237 | 0,28179319 | 0,3644064 | 0,4184213 | 0,06648775  | 0,79279286 | 0,81228628 | 0,88907241  | 0,00382857 | 0,00785761 | 7,550593  | 7,898841  |
| 0,0830198  | 0,18502386 | -0,8355185 | 0,0286396 | 0,0629759 | 0,17029581  | 0,61566429 | 0,68702086 | -0,81838419 | 0,03004643 | 0,07224097 | 3,1992    | 3,839289  |
| 0,04524752 | 0,05622423 | -0,2551842 | 0,4060919 | 0,396387  | -0,45669172 | 0,04776071 | 0,0569664  | 0,09195652  | 0,667175   | 0,67775881 | 6,963107  | 7,470621  |
| 0,11944554 | 0,22775934 | 0,59966467 | 0,0886537 | 0,1425696 | 0,03828029  | 0,90516429 | 0,92190591 | 0,0433854   | 0,89323214 | 0,91163612 | 4,851167  | 5,409089  |
| 0,27679703 | 0,24671341 | -0,1260838 | 0,527788  | 0,5071619 | -0,13308332 | 0,43626429 | 0,41649091 | -0,36863348 | 0,04657143 | 0,03944364 | 7,190269  | 8,05193   |
| 0,65022277 | 0,48860003 | 0,02497903 | 0,8706926 | 0,8519835 | -0,1462475  | 0,24596429 | 0,17961694 | -0,0414269  | 0,73558929 | 0,69255382 | 8,66704   | 9,187197  |
| 0,09227723 | 0,09693672 | -0,1066951 | 0,6654099 | 0,6557213 | -0,06112878 | 0,75418929 | 0,75676859 | -0,52307628 | 0,01888571 | 0,0201808  | 3,197771  | 4,601371  |
| 0,1680297  | 0,14872064 | 0,20993458 | 0,339417  | 0,3164291 | -0,37290684 | 0,04385714 | 0,039347   | -0,15451073 | 0,37348571 | 0,35368212 | 4,475866  | 4,696361  |
| 0,61832673 | 0,5516403  | -0,1742153 | 0,3493569 | 0,3181656 | 0,14641167  | 0,40873929 | 0,39697018 | -0,17906454 | 0,31783214 | 0,30413706 | 4,928263  | 4,50722   |
| 0,31565347 | 0,35830807 | 0,49398572 | 0,1232014 | 0,1375855 | -0,16472587 | 0,49793214 | 0,53662882 | 0,40327783  | 0,11461786 | 0,14668649 | 3,007505  | 4,475345  |
| 0,98194554 | 0,98150333 | 0,08807208 | 0,7048516 | 0,7123932 | -0,052515   | 0,82571786 | 0,84082587 | 0,09595989  | 0,68886429 | 0,71423454 | 4,855747  | 5,071444  |
| 0,01403465 | 0,00657544 | 0,3453713  | 0,0378375 | 0,0266796 | -0,21053003 | 0,04499286 | 0,01516996 | -0,18455043 | 0,07611786 | 0,02885807 | NA        | 2,788086  |
| 0,02885149 | 0,06983232 | 0,07588877 | 0,8137385 | 0,8276479 | 0,66015751  | 0,01965357 | 0,03303185 | 0,72452772  | 0,01268571 | 0,02190026 | 0,7713811 | 0,4408042 |
| 0,29697525 | 0,24177567 | -0,0620534 | 0,7463145 | 0,7275718 | 0,18231202  | 0,29761071 | 0,28063155 | 0,24840908  | 0,16505    | 0,15046176 | 6,014362  | 6,520917  |
| 0,00566337 | 0,01064287 | 0,14354011 | 0,5390919 | 0,5359605 | 0,57074958  | 0,01697857 | 0,02203293 | 0,67787081  | 0,00671786 | 0,00906144 | 5,01666   | 5,853763  |

|            |            |            |           |           |             |            |            |             |            |            |          |          |
|------------|------------|------------|-----------|-----------|-------------|------------|------------|-------------|------------|------------|----------|----------|
| 0,01421782 | 0,03140412 | -0,1523438 | 0,5618728 | 0,5784484 | 0,74412036  | 0,00286071 | 0,0039075  | 0,58071362  | 0,01388929 | 0,0163158  | 5,041134 | 4,938069 |
| 0,02940594 | 0,04109828 | -0,3513909 | 0,1171307 | 0,1190669 | 0,58872628  | 0,00987857 | 0,01165028 | 0,27038177  | 0,18871071 | 0,1931511  | 5,274142 | 4,48784  |
| 0,35223267 | 0,21784158 | 0,09714784 | 0,4434417 | 0,3600038 | 0,07065971  | 0,57866429 | 0,52220733 | 0,22791737  | 0,092675   | 0,05637078 | 5,676354 | 5,483148 |
| 0,46984158 | 0,42374785 | -0,1027335 | 0,5796784 | 0,5601568 | 0,27722721  | 0,105075   | 0,08855992 | -0,02913211 | 0,85671071 | 0,84814871 | 6,042234 | 5,559704 |
| 0,40012376 | 0,40617734 | -0,2746178 | 0,2683498 | 0,2698502 | 0,19778185  | 0,36916786 | 0,39366615 | -0,32503816 | 0,1531     | 0,17253252 | 5,237527 | 4,907252 |
| 0,1895198  | 0,12579518 | 0,14904794 | 0,3177314 | 0,2569092 | -0,03763025 | 0,79746786 | 0,77699424 | -0,15531977 | 0,3043     | 0,25753785 | 3,454826 | 4,211404 |
| 0,04279703 | 0,02346947 | 0,15372694 | 0,2923887 | 0,2329444 | 0,06167388  | 0,54625    | 0,4498402  | -0,19553782 | 0,07451429 | 0,03057979 | 6,438127 | 6,591521 |
| 0,32306931 | 0,29917131 | -0,0137898 | 0,9571201 | 0,9551621 | 0,13842976  | 0,46935    | 0,469118   | -0,28230296 | 0,15620714 | 0,15478185 | 4,710742 | 3,967405 |
| 0,19334158 | 0,21934185 | 0,47528071 | 0,0936148 | 0,1022763 | -0,00922901 | 0,96322143 | 0,96429353 | 0,48184303  | 0,03265357 | 0,03623967 | 4,285322 | NA       |
| 0,36313861 | 0,34548579 | -0,4119873 | 0,1272473 | 0,1228053 | 0,17130328  | 0,39558214 | 0,40564089 | -0,26721085 | 0,19638214 | 0,20448418 | 6,968647 | 6,649512 |
| 0,55485644 | 0,60046655 | 0,30119529 | 0,309212  | 0,3445876 | -0,20827158 | 0,44518214 | 0,50044467 | -0,08393895 | 0,75635714 | 0,7842287  | 7,17276  | 6,228518 |
| 0,16123762 | 0,09014473 | -0,245958  | 0,1225583 | 0,0876913 | -0,07928656 | 0,45366786 | 0,35217255 | -0,21323239 | 0,06118571 | 0,02453939 | 4,435909 | 4,582779 |
| 0,38472772 | 0,30489328 | 0,01767117 | 0,9210742 | 0,9126332 | 0,03083362  | 0,8408     | 0,82876562 | -0,20731707 | 0,19540714 | 0,16454743 | 6,06084  | 6,224952 |
| 0,1835396  | 0,22918071 | 0,05313159 | 0,8294735 | 0,8367987 | 0,15907333  | 0,34703214 | 0,32164364 | 0,51361607  | 0,008375   | 0,00659907 | 9,144319 | 9,053702 |
| 0,06105446 | 0,09870927 | 0,69578565 | 0,012265  | 0,0208071 | -0,19097805 | 0,40158571 | 0,4279702  | 0,40780583  | 0,09037857 | 0,10714918 | 3,810012 | 3,458778 |
| 0,00078218 | 0,00075144 | 0,74292971 | 0,0039081 | 0,0047975 | 0,51321895  | 0,0203     | 0,02367078 | 0,29145768  | 0,15820714 | 0,16432461 | 3,643776 | 3,886732 |
| 0,08829208 | 0,09465826 | -0,3055192 | 0,1338869 | 0,1287609 | 0,42732831  | 0,04933571 | 0,0563175  | 0,18307825  | 0,37097143 | 0,3804702  | 4,463965 | 4,026567 |
| 0,46235644 | 0,52883272 | 0,10744004 | 0,7000318 | 0,7241508 | 0,32131391  | 0,23345714 | 0,28615645 | 0,16691822  | 0,52939643 | 0,57242711 | 5,111948 | 5,637307 |
| 0,41499505 | 0,34496477 | 0,23607284 | 0,2102827 | 0,1823967 | -0,25741    | 0,13015    | 0,11348322 | 0,10296641  | 0,53033571 | 0,50579464 | 4,496278 | 4,256874 |
| 0,54634653 | 0,40736299 | 0,14972026 | 0,195212  | 0,124488  | -0,01517736 | 0,87172857 | 0,83517159 | 0,0253553   | 0,788375   | 0,72876816 | 7,328801 | 7,418357 |
| 0,8369901  | 0,82679382 | -0,0958464 | 0,7102862 | 0,7120832 | -0,0209443  | 0,923825   | 0,92810538 | 0,11393595  | 0,60994286 | 0,62620525 | 5,597342 | 4,46047  |
| 0,14482673 | 0,14334834 | -0,3964371 | 0,1410671 | 0,1340223 | 0,09800378  | 0,62429643 | 0,63034143 | -0,45134713 | 0,04058571 | 0,0438848  | 8,087359 | 6,820962 |
| 0,01435149 | 0,01664963 | -0,1512677 | 0,5483569 | 0,5285992 | -0,46129735 | 0,01586786 | 0,0133992  | 0,23946217  | 0,17561429 | 0,15610559 | 7,245611 | 7,000365 |
| 0,23817822 | 0,13276691 | -0,1248429 | 0,3244205 | 0,2396362 | -0,12929305 | 0,30931071 | 0,23887013 | -0,07478275 | 0,55234643 | 0,48682732 | 6,908567 | 7,164012 |
| 0,44146535 | 0,40908419 | -0,2799661 | 0,2825654 | 0,2683377 | 0,10292177  | 0,59858214 | 0,60162588 | -0,30969635 | 0,13284643 | 0,13459961 | 6,684101 | 6,721682 |
| 0,59729703 | 0,4893539  | 0,02461366 | 0,871159  | 0,8531089 | -0,14198181 | 0,35868214 | 0,31975794 | 0,05578816  | 0,71408214 | 0,69060573 | 4,546467 | 3,808252 |
| 0,16546535 | 0,13691459 | -0,0164124 | 0,9238339 | 0,917087  | 0,01546192  | 0,92643929 | 0,92416883 | 0,30676377  | 0,09019286 | 0,07948792 | 4,623275 | 4,428966 |
| 0,3584901  | 0,3286719  | -0,0878543 | 0,6831025 | 0,671174  | -0,21582494 | 0,28094286 | 0,28379188 | 0,0578929   | 0,76769643 | 0,76860027 | 5,274515 | 5,676    |
| 0,00692079 | 0,00472314 | -0,0243491 | 0,8657845 | 0,8435674 | -0,10506628 | 0,42435714 | 0,35838208 | 0,38663418  | 0,0104     | 0,0048258  | 4,209259 | 4,272427 |
| 0,01288614 | 0,00655286 | 0,06704933 | 0,6509399 | 0,6049833 | -0,39546726 | 0,00535714 | 0,00197218 | 0,08687967  | 0,47240357 | 0,39461062 | 7,990179 | 8,612131 |
| 0,03832673 | 0,05967728 | 0,28757435 | 0,232     | 0,2447395 | -0,65245954 | 0,00769643 | 0,01029785 | 0,2408029   | 0,26421786 | 0,27880112 | 6,062407 | 7,711025 |
| 0,51218317 | 0,26099009 | -0,0412012 | 0,7203675 | 0,6790674 | -0,0935956  | 0,21757143 | 0,09044881 | -0,01034211 | 0,88822143 | 0,84175249 | 5,332757 | 5,098252 |
| 0,11856931 | 0,13668683 | -0,1645545 | 0,4508092 | 0,4512148 | -0,35868034 | 0,08418214 | 0,08808999 | -0,31537826 | 0,1269     | 0,12866122 | 5,925135 | 6,955379 |
| 0,14683168 | 0,11969907 | 0,25000038 | 0,1489611 | 0,1238389 | -0,12787639 | 0,42003571 | 0,38954958 | 0,38417138  | 0,02802143 | 0,02098742 | 3,273205 | 3,860789 |
| 0,13609901 | 0,18317554 | -0,3110712 | 0,2197244 | 0,2452908 | -0,27683216 | 0,23658571 | 0,26813111 | -0,4320847  | 0,07692143 | 0,09599128 | 6,67822  | 7,109783 |
| 0,0689505  | 0,0474533  | 0,32125883 | 0,0434912 | 0,0290591 | -0,16823539 | 0,24597143 | 0,19803775 | -0,06140191 | 0,66474643 | 0,62775182 | 3,800425 | 4,039814 |
| 0,0955198  | 0,09900097 | -0,1708679 | 0,437735  | 0,4227828 | -0,36262105 | 0,08672143 | 0,09269471 | -0,06799431 | 0,73336786 | 0,73684766 | 6,394743 | 6,636369 |
| 0,91029208 | 0,89844914 | 0,02367582 | 0,9086572 | 0,9062067 | -0,0288837  | 0,88915714 | 0,89310178 | 0,05862417  | 0,77835714 | 0,78536981 | 4,292892 | 4,249282 |
| 0,02379208 | 0,04281615 | -0,3832547 | 0,1438622 | 0,160805  | -0,47288877 | 0,07119643 | 0,0972984  | -0,26375947 | 0,29525    | 0,33468447 | 7,253337 | 7,336027 |
| 0,14902475 | 0,10694544 | 0,04155992 | 0,788053  | 0,7628754 | -0,05417284 | 0,72833929 | 0,71129884 | 0,26817741  | 0,10734643 | 0,08685861 | 4,63061  | 4,232409 |
| 0,35358911 | 0,17782616 | 0,08239351 | 0,4313922 | 0,3176501 | -0,04813515 | 0,63431429 | 0,55139848 | 0,17950972  | 0,096175   | 0,04266064 | 4,542596 | 4,536771 |
| 0,08511881 | 0,12777769 | 0,61856829 | 0,1272191 | 0,1422257 | -0,4673008  | 0,09605357 | 0,13594353 | -0,33163191 | 0,22666786 | 0,27855131 | 2,616918 | 5,114036 |
| 0,16372772 | 0,23795688 | -0,207773  | 0,4645512 | 0,5031633 | -0,39934516 | 0,11816071 | 0,14918195 | -0,47394189 | 0,07078214 | 0,09341204 | 5,604296 | 6,67702  |
| 0,03743564 | 0,0371901  | 0,47099036 | 0,0154028 | 0,0142186 | -0,13615175 | 0,41818571 | 0,39625019 | 0,03325953  | 0,84073571 | 0,83329942 | 4,069574 | 4,429519 |
| 0,0104604  | 0,01714187 | 0,3448518  | 0,2634664 | 0,2558616 | -0,73532193 | 0,00257857 | 0,00340338 | 0,26202542  | 0,20695    | 0,21277989 | 5,378025 | 7,315145 |
| 0,32618812 | 0,32870583 | -0,1669212 | 0,4343039 | 0,4330176 | -0,12099988 | 0,53124643 | 0,53405717 | -0,39087514 | 0,06043929 | 0,0623893  | 7,017496 | 7,450167 |
| 0,27498515 | 0,15086002 | 0,11030283 | 0,4756961 | 0,4194454 | -0,24007809 | 0,06541071 | 0,0360491  | -0,00370943 | 0,97553929 | 0,97123982 | 8,24602  | 8,783776 |

|            |            |            |           |           |             |            |            |             |            |            |          |           |
|------------|------------|------------|-----------|-----------|-------------|------------|------------|-------------|------------|------------|----------|-----------|
| 0,07477228 | 0,06656354 | 0,06404795 | 0,7123569 | 0,6915407 | 0,25021102  | 0,15480357 | 0,14058595 | 0,42951057  | 0,02365357 | 0,01978356 | 5,508708 | 5,67285   |
| 0,7570396  | 0,76981821 | -0,1844819 | 0,4618587 | 0,4834359 | -0,08247805 | 0,72463929 | 0,74581638 | -0,20959594 | 0,38250357 | 0,41639266 | 5,613077 | 6,614958  |
| 0,09311881 | 0,11701699 | -0,4350326 | 0,0662544 | 0,0749918 | -0,13609869 | 0,46326071 | 0,45620484 | -0,43780804 | 0,03237143 | 0,0307493  | 4,724616 | 5,105745  |
| 0,37425248 | 0,38544315 | -0,0313371 | 0,923735  | 0,9223993 | -0,18434484 | 0,40425    | 0,4249558  | -0,36839274 | 0,11240714 | 0,12702014 | 5,712777 | 5,840886  |
| 0,61258911 | 0,62335879 | 0,1133074  | 0,6786608 | 0,6834707 | -0,3100784  | 0,17965357 | 0,20602834 | -0,0773622  | 0,72875357 | 0,74379726 | 6,015784 | 4,834683  |
| 0,86683168 | 0,86113248 | -0,1684264 | 0,5387314 | 0,538105  | 0,0613461   | 0,78322143 | 0,79694845 | -0,17075946 | 0,45218929 | 0,47842676 | 5,707112 | 5,004392  |
| 0,04576733 | 0,31445686 | 2,247236   | 0,0129293 | 0,1012516 | -0,72801596 | 0,36573571 | 0,58877561 | 1,95370179  | 0,027275   | 0,16322163 | 8,059484 | 4,807466  |
| 0,0009505  | 0,00080231 | 0,20052573 | 0,5908905 | 0,5767161 | 0,18143966  | 0,29327857 | 0,26990669 | 0,97104821  | 7,50E-05   | 6,79E-05   | 8,292636 | 8,365721  |
| 0,8669802  | 0,76803069 | -0,0843372 | 0,4781378 | 0,3868362 | 0,0252079   | 0,83904286 | 0,81321478 | 0,00789357  | 0,94922857 | 0,94094939 | 4,346269 | 4,433329  |
| 0,84859406 | 0,77797434 | -0,1137873 | 0,4421378 | 0,3823084 | 0,07251506  | 0,63864643 | 0,61457589 | -0,05988851 | 0,69827857 | 0,67692693 | 5,370617 | 4,715743  |
| 0,37861386 | 0,43748841 | 0,33050825 | 0,222682  | 0,2569537 | -0,26855016 | 0,3115     | 0,36700264 | -0,10206065 | 0,69462143 | 0,72744739 | 7,778784 | 8,236087  |
| 0,19565347 | 0,14818336 | 0,23167685 | 0,2942615 | 0,2646213 | -0,29731726 | 0,07672143 | 0,06286316 | 0,19849833  | 0,22269286 | 0,19455789 | 3,234415 | 3,189948  |
| 0,54549505 | 0,50841195 | 0,03281647 | 0,8663074 | 0,8602223 | -0,09008952 | 0,617475   | 0,61072104 | 0,2063685   | 0,26634286 | 0,25583427 | 4,134241 | 4,114436  |
| 0,05773762 | 0,1024336  | 0,36799927 | 0,3559187 | 0,3658189 | -0,73200596 | 0,01495714 | 0,02964967 | 0,23815634  | 0,37846071 | 0,43376151 | 4,658143 | 7,073156  |
| 0,99197525 | 0,99041063 | 0,09073466 | 0,7670671 | 0,7592054 | -0,02597031 | 0,89466071 | 0,89595645 | 0,00241517  | 0,98998571 | 0,99030725 | 5,961018 | 5,873394  |
| 0,11780693 | 0,13311566 | 0,38845731 | 0,1937597 | 0,1906724 | -0,29008375 | 0,16817857 | 0,17736251 | 0,49813101  | 0,02813214 | 0,03124624 | 3,617913 | NA        |
| 0,2894703  | 0,22292237 | 0,23037327 | 0,160682  | 0,1262386 | 0,0051251   | 0,97382857 | 0,97230798 | 0,00673682  | 0,965625   | 0,9636056  | 5,468074 | 5,978058  |
| 0,9414505  | 0,93882728 | -0,103728  | 0,7471413 | 0,7464705 | -0,0803948  | 0,72764643 | 0,74854057 | -0,10066453 | 0,66521786 | 0,68854169 | 6,557279 | 6,873064  |
| 0,05919307 | 0,06529479 | 0,32822586 | 0,1909929 | 0,1809114 | 0,18985948  | 0,29818571 | 0,28523324 | 0,53455354  | 0,00997857 | 0,0091862  | 5,722964 | 5,849278  |
| 0,4650198  | 0,46882375 | 0,1984402  | 0,381053  | 0,3854089 | -0,03821552 | 0,86323571 | 0,87072051 | 0,32575861  | 0,16272857 | 0,18385081 | 4,970015 | 4,937537  |
| 0,09141584 | 0,07307207 | 0,15917784 | 0,3350212 | 0,292502  | 0,15245113  | 0,36201071 | 0,33938165 | 0,40671755  | 0,02692143 | 0,02200881 | 4,111626 | 4,99646   |
| 0,32879703 | 0,29742144 | 0,13372569 | 0,5255548 | 0,507188  | -0,08918463 | 0,63611429 | 0,63446109 | 0,33414566  | 0,09703929 | 0,09472564 | 3,833693 | 4,091942  |
| 0,95029208 | 0,96777735 | 0,24728238 | 0,6063993 | 0,6569388 | -0,18445562 | 0,618775   | 0,69552899 | 0,09532238  | 0,79752143 | 0,83956406 | 4,579464 | 6,844017  |
| 0,4075495  | 0,33718416 | -0,0355273 | 0,8315053 | 0,815988  | -0,21196179 | 0,21045    | 0,18914693 | -0,19125064 | 0,25775714 | 0,23292698 | 7,093189 | 7,725893  |
| 0,23773762 | 0,17566433 | 0,21771455 | 0,1971837 | 0,1566454 | -0,1354603  | 0,33086071 | 0,27415144 | -0,13760659 | 0,32599286 | 0,26778388 | 3,863403 | 4,427128  |
| 0,02127723 | 0,02002218 | 0,58272634 | 0,0032792 | 0,0028756 | -0,19919807 | 0,24081429 | 0,21865711 | 0,26566693  | 0,12799286 | 0,11004363 | 4,054935 | 4,233084  |
| 0,10808911 | 0,11773937 | 0,28875864 | 0,1882191 | 0,1848423 | 0,19024078  | 0,35856071 | 0,36847535 | -0,00509196 | 0,98004643 | 0,98046998 | 4,111971 | 4,859     |
| 0,49056436 | 0,45896657 | 0,15337205 | 0,4827668 | 0,4686107 | -0,28347765 | 0,145825   | 0,14423525 | 0,10640545  | 0,57278214 | 0,56768461 | 3,337908 | 4,288908  |
| 0,80310396 | 0,84999361 | 0,01081478 | 0,9739894 | 0,9771112 | -0,04147517 | 0,88910714 | 0,90566443 | -0,28317888 | 0,35464643 | 0,42637801 | 1,981331 | 2,340397  |
| 0,95691584 | 0,94799352 | 0,03527943 | 0,8590459 | 0,8530298 | 0,06612126  | 0,71609286 | 0,71321092 | 0,06041561  | 0,74102857 | 0,73703441 | NA       | 1,854737  |
| 0,55370297 | 0,50142207 | -0,1800801 | 0,3297668 | 0,3051696 | 0,23821459  | 0,09823571 | 0,06615256 | 0,03926573  | 0,77361786 | 0,74367545 | 5,570731 | NA        |
| 0,05306436 | 0,08361714 | 0,10552312 | 0,664583  | 0,6769767 | 0,09130122  | 0,701275   | 0,72384637 | -0,47333621 | 0,06659286 | 0,08729763 | 6,617197 | 7,405719  |
| 0,00081683 | 0,00244815 | 2,10703031 | 0,000477  | 0,0003826 | -0,74057442 | 0,03632857 | 0,07836355 | 0,45511944  | 0,17727143 | 0,25842026 | 5,96556  | 4,871112  |
| 0,66096535 | 0,58956407 | 0,24760622 | 0,2879965 | 0,260393  | -0,16936523 | 0,30081429 | 0,27078679 | 0,04828695  | 0,76353571 | 0,74760926 | 6,40047  | NA        |
| 0,01547525 | 0,00419683 | 0,08197169 | 0,4062014 | 0,2809866 | -0,27475982 | 0,01390714 | 0,00374289 | 0,12999287  | 0,20306071 | 0,11164585 | 6,002202 | 5,914187  |
| 0,01952475 | 0,03161985 | -0,6297665 | 0,0840742 | 0,0858524 | 0,70517276  | 0,00633571 | 0,00935175 | 0,23087502  | 0,30393571 | 0,3258699  | 2,252153 | 0,6739285 |
| 0,32583168 | 0,33860431 | 0,23075245 | 0,3068339 | 0,3124267 | -0,01954345 | 0,92276071 | 0,92518002 | 0,43128586  | 0,05246071 | 0,05776729 | 3,981158 | 3,935233  |
| 0,06761386 | 0,03350982 | 0,01484937 | 0,9143039 | 0,8991713 | -0,00570063 | 0,9616     | 0,95523168 | 0,30923392  | 0,02249286 | 0,00983572 | 5,149027 | 5,143025  |
| 0,12478713 | 0,20107067 | 0,72978879 | 0,0207951 | 0,0395129 | -0,36325521 | 0,13879643 | 0,16771944 | 0,46642997  | 0,06687143 | 0,08536781 | 7,232861 | NA        |
| 0,41093069 | 0,41057145 | 0,18251243 | 0,4057562 | 0,4057651 | -0,0003415  | 0,99868571 | 0,99879228 | -0,14338605 | 0,51244643 | 0,52919684 | 2,363544 | 3,193208  |
| 0,21124752 | 0,2352265  | 0,64894733 | 0,0598799 | 0,0694032 | 0,00796547  | 0,97258214 | 0,97483718 | 0,36214521  | 0,14390714 | 0,17091306 | 2,65239  | NA        |
| 0,06948515 | 0,09385493 | -0,3139781 | 0,4133675 | 0,4076693 | 0,64509807  | 0,01263214 | 0,01886238 | 0,00284143  | 0,98974286 | 0,99055866 | 4,040794 | 3,773788  |
| 0,10480693 | 0,09987132 | 0,07734889 | 0,6731343 | 0,6574152 | 0,33178313  | 0,10188571 | 0,10576115 | 0,32752964  | 0,10753929 | 0,10979237 | 2,300906 | NA        |
| 0,86715842 | 0,88700961 | 0,08603446 | 0,7602155 | 0,7805482 | 0,03865963  | 0,88802143 | 0,90286883 | 0,25166823  | 0,37045357 | 0,4334776  | 3,307999 | NA        |
| 0,17634653 | 0,19020733 | -0,0786537 | 0,7152403 | 0,7147988 | -0,34801775 | 0,09801429 | 0,10332432 | -0,10745865 | 0,59207143 | 0,59509986 | 4,400864 | 5,498133  |
| 0,68773762 | 0,75051064 | 0,19537239 | 0,5337138 | 0,5821122 | -0,35202919 | 0,26082857 | 0,34214016 | 0,06258911  | 0,83695357 | 0,86311    | 2,613002 | NA        |
| 0,63571287 | 0,73195085 | 0,02451491 | 0,9447456 | 0,9530825 | -0,13623368 | 0,70190714 | 0,7605731  | 0,33182431  | 0,36280714 | 0,46328197 | 5,331255 | 7,065195  |

|            |            |            |           |           |             |            |            |             |            |            |
|------------|------------|------------|-----------|-----------|-------------|------------|------------|-------------|------------|------------|
| 0,02308911 | 0,01462234 | 0,38789962 | 0,0117244 | 0,0068232 | -0,0875646  | 0,46998214 | 0,39394041 | 0,00448275  | 0,97015714 | 0,96466497 |
| 0,5465198  | 0,43267678 | -0,1450379 | 0,4949753 | 0,4609918 | 0,22242002  | 0,13819643 | 0,104135   | 0,0280637   | 0,84463929 | 0,82772356 |
| 0,10207426 | 0,10159716 | 0,54917883 | 0,0440106 | 0,0427931 | -0,06101824 | 0,73986429 | 0,73815706 | 0,42300126  | 0,03789286 | 0,03679082 |
| 0,01456436 | 0,03939302 | 0,5237989  | 0,1203604 | 0,1471165 | -0,50090295 | 0,05946786 | 0,08402788 | 0,94009156  | 0,00217143 | 0,00447573 |
| 0,12101485 | 0,14827748 | -0,1916402 | 0,5281201 | 0,5276352 | 0,40005358  | 0,093      | 0,1153041  | -0,34746103 | 0,14191786 | 0,1655977  |
| 0,21944059 | 0,32631333 | 0,42384155 | 0,2501378 | 0,2937604 | -0,12551581 | 0,67946071 | 0,73000682 | 0,66210821  | 0,04659286 | 0,08867781 |
| 0,03569802 | 0,13677935 | 0,47761564 | 0,3077456 | 0,4045923 | -0,38210261 | 0,33609286 | 0,45389451 | 1,32728298  | 0,00458214 | 0,02095077 |

|          |          |
|----------|----------|
| 3,683572 | 4,143589 |
| 4,15694  | 3,742484 |
| 4,546759 | NA       |
| 4,593041 | 4,386867 |
| 3,47859  | 2,713125 |
| 4,394624 | 4,205809 |
| 6,923123 | 8,074975 |

RAW DATA

| SAL-INTACT3     | SAL-INTACT4     | SAL-INTACT5     | SAL-INTACT6     | SAL-LESION1     | SAL-LESION2     | SAL-LESION3     | SAL-LESION4     | SAL-LESION5     | SAL-LESION6     | LDOPA-INTACT1   | LDOPA-INTACT2   | LDOPA-INTACT3   | LDOPA-INTACT4   |
|-----------------|-----------------|-----------------|-----------------|-----------------|-----------------|-----------------|-----------------|-----------------|-----------------|-----------------|-----------------|-----------------|-----------------|
| Int (log2)<br>5 | Int (log2)<br>1 | Int (log2)<br>3 | Int (log2)<br>6 | Int (log2)<br>5 | Int (log2)<br>1 | Int (log2)<br>7 | Int (log2)<br>4 | Int (log2)<br>2 | Int (log2)<br>3 | Int (log2)<br>1 | Int (log2)<br>5 | Int (log2)<br>7 | Int (log2)<br>4 |
| 10,9366         | 11,25951        | 11,02702        | 11,07328        | 11,2479         | 11,06219        | 10,52425        | 11,31468        | 11,12759        | 11,67259        | 11,33965        | 11,144          | 10,82593        | 10,8141         |
| 4,830999        | 4,157751        | 4,411266        | 4,72876         | 3,8009          | 4,550736        | 3,979424        | 4,187747        | 4,503599        | 5,126906        | 4,507342        | 4,433075        | 3,976605        | 4,703742        |
| 5,987674        | 6,906476        | 5,974631        | 6,360811        | 6,504691        | 6,523468        | 5,061923        | 6,122917        | 6,231387        | 7,054611        | 6,133827        | 6,335462        | 5,939091        | 5,938332        |
| 5,713634        | 3,799168        | 6,582811        | 6,279901        | 5,849455        | 6,423491        | 5,740746        | 6,107239        | 6,206534        | 6,610529        | 5,07378         | 5,782064        | 5,969833        | 6,557097        |
| 5,169203        | 4,052488        | 4,393244        | 3,745967        | 3,593838        | 3,093821        | 2,660941        | 3,10798         | 5,170074        | 5,808884        | 5,289567        | 3,963005        | 3,430236        | 4,777572        |
| 3,986821        | 3,275473        | 3,733951        | 3,975642        | 3,16267         | 3,739126        | 2,988538        | 3,550652        | 3,796875        | 4,470411        | 3,624638        | 3,591256        | 3,004207        | 3,978945        |
| 7,251612        | 7,228443        | 7,108276        | 7,083099        | 6,866674        | 7,080914        | 6,661141        | 6,751472        | 7,112158        | 7,604946        | 7,130275        | 7,144153        | 6,8261          | 7,06567         |
| 4,007835        | 4,481725        | 4,033049        | 4,028448        | 4,812977        | 4,496346        | 3,680227        | 4,754674        | 4,214444        | 4,997577        | 4,486425        | 4,170366        | 3,763334        | 3,743733        |
| 10,06465        | 8,375194        | 10,36161        | 10,34225        | 9,881917        | 10,24176        | 9,530681        | 10,22993        | 10,28066        | 10,39531        | 9,158057        | 10,16269        | 9,725076        | 10,52063        |
| 8,886364        | 9,734073        | 9,219053        | 9,669517        | 9,408115        | 9,820535        | 8,954622        | 8,618554        | 8,532731        | 9,616905        | 9,297846        | 10,06794        | 9,468779        | 9,634254        |
| 4,47776         | 5,917039        | 5,272814        | 5,202356        | 5,100458        | 5,661213        | 4,621287        | 4,749373        | 5,247908        | 5,488584        | 5,701463        | 5,327354        | 4,299952        | 5,175276        |
| 9,797449        | 10,38029        | 10,30536        | 10,17712        | 10,1559         | 10,89466        | 9,327873        | 10,02472        | 10,12609        | 10,5103         | 10,18493        | 10,09279        | 9,624699        | 9,660569        |
| 5,936825        | 5,270368        | 5,586411        | 6,541534        | 6,441376        | 4,975473        | 5,626694        | 5,581639        | 5,205286        | 5,049406        | 5,21185         | 6,127591        | 6,008132        | 5,282584        |
| 12,30563        | 12,80565        | 12,48739        | 12,66815        | 12,55062        | 12,72142        | 12,04332        | 12,12143        | 12,25728        | 12,50812        | 12,69256        | 12,95084        | 12,18049        | 12,64666        |
| 3,995723        | 1,919783        | 4,913771        | 4,713922        | 4,270251        | 4,833628        | 4,125883        | 4,480662        | 4,64946         | 4,980387        | 3,273712        | 4,219182        | 4,236227        | 4,991267        |
| 7,676289        | 7,495037        | 7,748854        | 8,35938         | 8,548388        | 7,445865        | 7,40802         | 7,231132        | 6,857615        | 7,78735         | 7,315651        | 8,706398        | 7,947461        | 7,922503        |
| 4,906988        | 4,346424        | 4,694019        | 5,367259        | 5,254506        | 5,210468        | 4,63697         | 4,99092         | 4,626829        | 5,698406        | 5,011489        | 4,814003        | 4,716796        | 5,139092        |
| 4,532817        | 4,999186        | 4,671124        | 4,898396        | 4,806838        | 5,752403        | 4,800854        | 4,997669        | 4,957585        | 5,73944         | 4,712406        | 4,374231        | 4,197725        | 4,497548        |
| 3,905651        | 3,901328        | 3,474406        | 3,728222        | 4,403128        | 3,807885        | 3,112979        | 3,854248        | 3,214668        | 4,585954        | 3,597296        | 3,483366        | 4,503669        | 3,401732        |
| 7,18993         | 7,29969         | 6,612351        | 7,379455        | 7,278498        | 7,154351        | 6,265783        | 7,173791        | 6,445697        | 7,54246         | 7,16245         | 6,983754        | 6,433182        | 7,235617        |
| 5,607778        | 5,70428         | 5,633755        | 5,985723        | 4,859067        | 6,428596        | 5,613871        | 5,610359        | 5,912766        | 6,650977        | 5,904494        | 5,282442        | 4,225476        | 5,846963        |
| 5,142029        | 6,813333        | 5,807104        | 6,370425        | 5,879022        | 7,021106        | 5,179138        | 5,031833        | 4,915395        | 6,425859        | 6,012548        | 6,990918        | 6,219438        | 6,43349         |
| 12,92038        | 13,55087        | 13,15444        | 13,0454         | 13,10967        | 13,31433        | 12,65989        | 12,71505        | 13,17502        | 13,31446        | 13,37624        | 13,57919        | 12,85512        | 13,20671        |
| 8,939624        | 9,78899         | 9,266238        | 9,882035        | 9,422047        | 10,01707        | 9,127849        | 8,544256        | 8,575583        | 9,686718        | 9,437869        | 10,05934        | 9,681529        | 9,819261        |
| 6,464961        | 6,453789        | 6,673169        | 6,714979        | 6,560752        | 6,074279        | 6,454532        | 6,624332        | 6,066782        | 6,357183        | 6,348104        | 6,360805        | 6,238863        | 6,413105        |
| 5,821157        | 5,219436        | 5,071207        | 4,842319        | 4,100896        | 3,653626        | 4,293671        | 4,074167        | 5,391077        | 5,754418        | 5,412106        | 4,611955        | 4,032349        | 5,006711        |
| 12,40556        | 12,94089        | 12,74523        | 12,74617        | 12,76714        | 12,99576        | 12,3603         | 12,43902        | 12,53292        | 12,78784        | 12,91157        | 12,9466         | 12,47912        | 12,8711         |
| 5,431329        | 4,712018        | 4,784097        | 4,575366        | 4,37219         | 3,11616         | 3,950462        | 3,77369         | 4,9801          | 5,213473        | 5,0248          | 4,505224        | 4,038928        | 4,79364         |
| 4,166561        | 4,844061        | 4,433939        | 4,975686        | 4,45021         | 4,977773        | 4,238999        | 4,661213        | 4,605287        | 4,977937        | 4,937293        | 4,200956        | 3,929619        | 4,354728        |
| 5,442784        | 6,002952        | 5,364887        | 6,292007        | 5,909185        | 6,744696        | 6,068492        | 5,821036        | 5,888319        | 6,371131        | 5,727348        | 6,815226        | 5,163101        | 5,212215        |
| 4,374027        | 5,575632        | 4,556277        | 5,108292        | 4,564317        | 5,434015        | 4,207998        | 4,078821        | 4,168716        | 5,071791        | 4,763812        | 5,382451        | 4,712953        | 5,144868        |
| 5,844727        | 5,894029        | 5,775986        | 6,318034        | 6,179811        | 6,899355        | 6,28921         | 6,173836        | 6,08545         | 6,970526        | 6,041881        | 5,750758        | 5,000852        | 5,752749        |
| 6,321442        | 6,434011        | 6,370182        | 6,940657        | 6,706037        | 6,547306        | 6,272919        | 6,371149        | 6,154946        | 6,958653        | 6,517567        | 6,332763        | 6,532489        | 6,327369        |
| 5,580375        | 6,632926        | 5,765658        | 6,383552        | 5,993845        | 6,744965        | 5,547168        | 5,003805        | 5,233737        | 6,294174        | 6,101752        | 7,019911        | 6,080401        | 6,394751        |
| 5,994065        | 6,226261        | 5,517231        | 6,104957        | 5,470766        | 5,917305        | 5,606665        | 5,600305        | 5,73632         | 5,904971        | 5,763711        | 6,54776         | 5,570878        | 6,151263        |
| 6,169468        | 6,312365        | 5,922854        | 6,204944        | 5,831239        | 5,530676        | 5,497168        | 5,775204        | 5,903461        | 6,766815        | 6,559128        | 5,998052        | 5,440619        | 6,431753        |
| 5,75525         | 5,441992        | 5,312267        | 5,199363        | 4,952048        | 4,262903        | 4,772026        | 4,254636        | 5,390692        | 5,668547        | 5,496815        | 5,356319        | 4,568841        | 5,115558        |
| 6,24699         | 6,481468        | 6,485035        | 6,573358        | 6,399243        | 6,554275        | 6,317605        | 5,887167        | 6,494114        | 6,461444        | 6,53969         | 6,878402        | 5,312263        | 6,187551        |
| 7,085417        | 6,987671        | 6,653901        | 6,866924        | 6,962697        | 6,230431        | 6,200688        | 6,669793        | 6,428946        | 7,284271        | 7,440469        | 6,885662        | 6,380779        | 7,16121         |
| 7,592301        | 7,625975        | 7,703021        | 7,894752        | 7,754354        | 7,677997        | 7,439317        | 7,112798        | 7,571489        | 7,61097         | 7,598217        | 7,913138        | 6,702198        | 7,53458         |
| 11,73238        | 12,99402        | 12,11074        | 12,10333        | 12,14285        | 12,73489        | 11,70555        | 11,32862        | 12,3412         | 12,32674        | 12,56666        | 12,89849        | 11,35625        | 12,24269        |

|          |          |          |          |          |          |          |          |          |          |          |          |          |          |
|----------|----------|----------|----------|----------|----------|----------|----------|----------|----------|----------|----------|----------|----------|
| 5,961709 | 6,380404 | 5,368247 | 6,046538 | 4,97989  | 7,287057 | 6,080684 | 5,560935 | 6,524489 | 7,174002 | 6,34791  | 5,806797 | 4,642798 | 6,076341 |
| 10,26551 | 10,22796 | 10,35038 | 10,31522 | 10,18203 | 10,35048 | 10,1328  | 9,529487 | 10,08908 | 10,07621 | 10,46031 | 9,912405 | 8,680237 | 9,782592 |
| 6,026494 | 8,305527 | 7,882233 | 8,145419 | 7,59835  | 7,483652 | 6,944794 | 7,459487 | 7,676337 | 8,715558 | 8,517727 | 8,727886 | 7,72276  | 7,904705 |
| 7,7693   | 7,774304 | 7,38151  | 7,520004 | 7,170795 | 6,842769 | 6,461969 | 7,41736  | 7,6179   | 8,558108 | 8,266651 | 7,969974 | 7,252337 | 7,578136 |
| 3,844528 | 4,906267 | 4,309257 | 4,303928 | 4,348764 | 4,738166 | 3,602824 | 3,691576 | 4,196611 | 4,431764 | 4,776796 | 4,431021 | 3,40862  | 4,280941 |
| 5,557499 | 6,716365 | 5,487082 | 6,442001 | 6,089057 | 6,549649 | 5,72557  | 5,071262 | 5,147128 | 6,4012   | 5,977335 | 7,212893 | 5,963359 | 6,318556 |
| 6,067257 | 6,660193 | 6,32419  | 7,160925 | 6,65731  | 6,885102 | 5,887719 | 5,082185 | 5,413981 | 6,520578 | 6,124792 | 7,030993 | 6,419364 | 6,572113 |
| 4,776887 | 6,32436  | 4,704163 | 5,675533 | 5,069207 | 5,785661 | 5,080419 | 4,200719 | 4,458293 | 5,877999 | 5,365571 | 6,635466 | 5,369799 | 5,572046 |
| 4,933441 | 4,937751 | 4,878445 | 5,187133 | 4,080747 | 5,669863 | 4,783753 | 4,476339 | 4,412852 | 5,376489 | 5,199954 | 4,562151 | 4,251901 | 5,063133 |
| 4,689819 | 5,665225 | 5,019207 | 5,081155 | 5,075066 | 5,444006 | 4,018008 | 3,965728 | 4,728836 | 4,918693 | 5,130214 | 5,511346 | 4,176961 | 5,056961 |
| 3,362206 | 3,818632 | 3,598853 | 3,412103 | 3,671544 | 3,864653 | 3,263541 | 2,986385 | 3,975496 | 3,89152  | 4,242891 | 3,86461  | 3,319183 | 3,950838 |
| 5,976196 | 7,037775 | 5,86162  | 6,596579 | 6,165165 | 6,740351 | 5,907112 | 4,946012 | 5,866107 | 6,435389 | 6,273561 | 7,38422  | 6,011985 | 6,486742 |
| 6,759895 | 6,802516 | 6,144991 | 6,795794 | 6,709457 | 6,597508 | 5,716841 | 6,588517 | 5,99237  | 6,943526 | 6,788155 | 6,591794 | 6,036165 | 6,766384 |
| 3,673018 | 3,788701 | 3,9045   | 3,8204   | 3,398099 | 3,621226 | 3,250572 | 3,535279 | 3,732663 | 4,100844 | 3,52803  | 3,590716 | 4,009527 | 3,452641 |
| 10,54776 | 11,09126 | 10,66742 | 10,95431 | 10,7609  | 10,87663 | 10,13501 | 10,04464 | 10,57084 | 10,60951 | 10,84515 | 11,39878 | 9,930324 | 10,65356 |
| 4,499513 | 4,562975 | 4,911405 | 4,748572 | 4,636308 | 4,517037 | 4,124162 | 4,185751 | 4,718414 | 4,732127 | 4,62453  | 4,440015 | 4,056549 | 4,263675 |
| 5,212675 | 5,167375 | 5,487625 | 5,804847 | 6,204892 | 6,533695 | 5,648193 | 6,291129 | 5,23807  | 6,14061  | 5,682301 | 5,310362 | 5,481413 | 5,215222 |
| 6,565286 | 6,476067 | 4,631806 | 5,646102 | 6,596019 | 7,051702 | 6,443326 | 6,379343 | 5,679945 | 7,430539 | 7,425904 | 7,168744 | 6,492891 | 7,233196 |
| 9,000661 | 9,295449 | 9,262786 | 9,18443  | 9,122303 | 9,348286 | 8,814897 | 8,342687 | 9,067683 | 9,05465  | 9,277226 | 8,967168 | 7,904591 | 8,780613 |
| 7,985578 | 8,782764 | 8,137273 | 8,775381 | 8,266592 | 8,52332  | 8,078655 | 7,382325 | 7,953466 | 8,496845 | 8,291056 | 8,958584 | 8,1792   | 8,396331 |
| 8,01781  | 9,322056 | 8,621283 | 8,638883 | 8,561829 | 4,964286 | 7,905948 | 8,015628 | 8,614027 | 4,35394  | 4,40297  | 9,171408 | 8,457029 | 8,662546 |
| 8,348116 | 9,389403 | 8,138961 | 8,5938   | 8,689244 | 9,144735 | 8,470527 | 8,471358 | 8,400414 | 9,293673 | 9,220928 | 9,620065 | 8,490546 | 8,940187 |
| 7,751935 | 7,710627 | 7,551276 | 7,981897 | 7,712243 | 7,945039 | 7,301049 | 7,637605 | 7,553245 | 8,094728 | 7,62393  | 7,944255 | 7,208311 | 7,391712 |
| 5,320066 | 5,191841 | 5,189761 | 5,690279 | 5,211324 | 5,005188 | 5,424094 | 5,03079  | 5,302046 | 5,241254 | 5,376345 | 5,117013 | 4,755447 | 5,05899  |
| 4,55962  | 4,817473 | 4,720501 | 4,77824  | 4,992877 | 5,387589 | 4,573634 | 4,897985 | 5,051269 | 5,636686 | 5,574295 | 4,897521 | 3,96191  | 4,375509 |
| 9,081474 | 8,960267 | 8,660412 | 9,076545 | 8,641422 | 8,949004 | 8,457165 | 8,702212 | 8,653117 | 9,54723  | 8,773418 | 8,405581 | 8,591848 | 9,312808 |
| 9,886495 | 9,413756 | 9,768053 | 10,16489 | 9,727929 | 9,413916 | 9,854915 | 9,633798 | 9,640118 | 9,645741 | 9,666543 | 9,571789 | 9,325701 | 9,687511 |
| 4,849118 | 6,787979 | 4,525544 | 6,111083 | 4,987449 | 5,972623 | 4,95214  | 3,75329  | 4,374891 | 5,244714 | 5,874847 | 7,076558 | 4,790214 | 5,310752 |
| 6,428324 | 6,81365  | 5,942819 | 7,076009 | 5,94173  | 6,536028 | 6,527104 | 4,758048 | 5,542479 | 6,433228 | 6,081904 | 7,075846 | 5,739109 | 6,259714 |
| 4,454907 | 4,741801 | 4,578111 | 4,592102 | 4,787111 | 5,183771 | 4,436907 | 5,161431 | 4,119664 | 5,186727 | 4,763284 | 4,488616 | 4,571029 | 4,41295  |
| 9,155136 | 9,046    | 8,633733 | 8,850286 | 8,157205 | 8,07569  | 8,176369 | 7,94301  | 8,983081 | 9,339097 | 9,440442 | 9,432929 | 7,242397 | 8,515094 |
| 4,111598 | 5,765036 | 4,538874 | 4,437818 | 4,346642 | 5,158959 | 3,75975  | 2,92867  | 5,012492 | 4,755732 | 5,07411  | 5,354314 | 3,039944 | 4,440341 |
| 7,27704  | 6,945346 | 6,527523 | 6,93984  | 6,201437 | 5,871274 | 6,117776 | 5,766645 | 6,845471 | 7,200688 | 7,249918 | 7,564932 | 5,347647 | 6,447906 |
| 7,562562 | 10,01263 | 7,367384 | 8,069829 | 7,73563  | 9,171816 | 7,071561 | 7,026601 | 8,90457  | 8,176997 | 9,545362 | 10,19902 | 6,265251 | 8,674726 |
| 7,944147 | 8,858676 | 7,974899 | 8,800627 | 8,445836 | 8,79291  | 8,007609 | 7,120884 | 7,667024 | 8,464687 | 8,262542 | 9,121769 | 8,257695 | 8,449836 |
| 3,847573 | 5,488708 | 4,161689 | 4,414358 | 4,250184 | 4,844947 | 3,660804 | 2,699466 | 4,815755 | 4,668054 | 4,866383 | 5,096762 | 2,616344 | 4,107396 |
| 8,328849 | 8,376675 | 7,759966 | 7,855529 | 7,401598 | 7,303979 | 7,098025 | 7,567682 | 8,445628 | 9,076634 | 8,888732 | 8,704331 | 8,102567 | 8,099421 |
| 9,035233 | 8,738435 | 8,551204 | 8,934353 | 8,118863 | 8,579497 | 8,40811  | 8,356822 | 8,788797 | 9,308011 | 8,946463 | 8,863039 | 8,116913 | 8,895305 |
| 6,081549 | 5,999296 | 5,914108 | 6,043854 | 5,45504  | 5,943378 | 5,426086 | 6,067702 | 5,863276 | 6,450162 | 5,253595 | 5,687638 | 6,204138 | 6,382149 |
| 2,189403 | 3,15077  | 3,151569 | 3,098512 | 3,554849 | 3,05097  | 2,458683 | 2,741709 | 2,955262 | 3,239085 | 2,895126 | 1,964919 | 1,761044 | 2,260008 |
| 9,614336 | 10,87002 | 9,82744  | 10,29461 | 10,01265 | 10,43024 | 9,672193 | 8,595003 | 9,96551  | 10,36871 | 10,14541 | 10,91402 | 9,318029 | 10,09553 |
| 7,342648 | 7,958038 | 6,915733 | 7,291995 | 6,452584 | 7,176754 | 6,331452 | 6,301098 | 7,572734 | 7,902218 | 8,069528 | 7,993447 | 6,248132 | 7,080688 |
| 10,23919 | 11,04848 | 10,26916 | 10,81182 | 10,35155 | 10,69747 | 10,04963 | 9,668283 | 10,28591 | 10,68014 | 10,60752 | 11,27537 | 10,33813 | 10,63226 |
| 6,61014  | 6,524675 | 6,119368 | 6,72759  | 6,212408 | 6,681697 | 5,958145 | 6,401111 | 5,826142 | 6,896784 | 6,180899 | 6,101794 | 5,871879 | 6,72434  |
| 13,33207 | 12,62377 | 12,56649 | 12,69946 | 12,41647 | 11,12912 | 11,78722 | 11,74674 | 12,67284 | 13,10179 | 12,95777 | 12,52872 | 12,09563 | 12,71889 |
| 7,756182 | 8,082129 | 7,779575 | 8,014946 | 7,647859 | 8,111481 | 7,026746 | 6,964607 | 7,628231 | 8,28971  | 7,716088 | 8,249848 | 7,270443 | 6,934622 |
| 6,626228 | 6,082787 | 6,166717 | 6,126274 | 5,923923 | 5,049879 | 5,435868 | 5,038717 | 6,132623 | 6,43925  | 6,300166 | 6,340333 | 5,11857  | 5,909375 |



|          |          |          |          |          |          |          |          |          |          |          |          |          |          |
|----------|----------|----------|----------|----------|----------|----------|----------|----------|----------|----------|----------|----------|----------|
| 6,007747 | 6,192767 | 5,874819 | 6,148638 | 6,089443 | 6,657082 | 5,948629 | 6,093946 | 6,039501 | 6,44146  | 5,969174 | 5,780818 | 5,663895 | 5,625623 |
| 5,742547 | 5,534056 | 5,360682 | 5,572909 | 4,646132 | 5,05369  | 4,909572 | 4,821374 | 5,616298 | 5,923034 | 5,6769   | 5,111491 | 4,796957 | 5,692952 |
| 10,32631 | 11,253   | 10,47384 | 11,01757 | 10,59135 | 11,149   | 10,21031 | 9,627799 | 10,24959 | 10,90586 | 10,72548 | 11,45372 | 10,51289 | 10,89882 |
| 8,295708 | 10,23142 | 7,787245 | 8,702835 | 8,198264 | 9,237934 | 7,964207 | 7,875415 | 9,296042 | 8,562264 | 10,01203 | 10,48952 | 7,406116 | 9,090361 |
| 11,7651  | 11,32472 | 11,06521 | 10,94328 | 10,7523  | 9,655429 | 10,25746 | 10,10634 | 11,34378 | 11,55588 | 11,68205 | 10,9966  | 10,5274  | 11,0422  |
| 4,455962 | 4,769785 | 5,115169 | 4,893184 | 4,836536 | 5,49827  | 4,059895 | 4,483562 | 5,30375  | 5,276654 | 5,439385 | 5,237356 | 4,428814 | 5,154795 |
| 7,375787 | 7,598522 | 5,954851 | 6,822948 | 7,442513 | 8,055048 | 7,325577 | 7,112804 | 7,160778 | 8,320684 | 7,869248 | 7,883327 | 7,117206 | 7,969728 |
| 12,73364 | 12,33393 | 12,08331 | 11,88566 | 11,80948 | 10,82238 | 10,99146 | 11,18429 | 12,35221 | 12,65521 | 12,49731 | 12,22055 | 11,47466 | 12,15967 |
| 4,179095 | 4,420656 | 4,817588 | 4,788062 | 4,722205 | 5,244889 | 3,91971  | 1,892734 | 5,098903 | 5,133742 | 5,190345 | 5,574169 | 2,889608 | 4,833377 |
| 7,119362 | 7,567172 | 6,435526 | 6,434665 | 6,378119 | 5,532889 | 4,878653 | 5,33896  | 7,023898 | 7,469659 | 6,887306 | 6,850556 | 5,834233 | 6,692688 |
| 8,5988   | 8,401869 | 8,24243  | 8,517899 | 7,740723 | 8,468978 | 7,967126 | 8,394682 | 8,147298 | 8,678214 | 8,01536  | 8,104055 | 7,428926 | 7,288687 |
| 12,36908 | 12,86332 | 9,30463  | 12,04842 | 9,468112 | 13,38705 | 11,80831 | 7,026343 | 12,88745 | 12,51652 | 13,18148 | 12,11902 | 8,598046 | 9,867654 |
| 4,257017 | 5,572128 | 4,873058 | 4,873776 | 4,957448 | 5,114327 | 4,130805 | 4,090799 | 4,883919 | 5,07888  | 5,313911 | 5,650921 | 3,786308 | 4,986953 |
| 9,694032 | 9,968754 | 8,357399 | 9,605838 | 8,808161 | 10,03799 | 8,876101 | 5,950427 | 10,05486 | 10,17893 | 9,651517 | 9,303612 | 7,349094 | 9,255263 |
| 15,33543 | 15,07581 | 14,11313 | 15,12274 | 14,29564 | 15,52223 | 15,04214 | 12,27191 | 15,61132 | 15,69343 | 15,50691 | 14,91874 | 13,22342 | 14,8175  |
| 10,93514 | 10,89263 | 9,684228 | 10,72981 | 9,716721 | 11,39272 | 10,66153 | 7,498107 | 11,32093 | 11,46513 | 11,20426 | 9,82749  | 8,733323 | 10,49379 |
| 4,646702 | 4,799314 | 4,924724 | 4,886266 | 4,876112 | 4,702836 | 4,87853  | 4,641422 | 5,141205 | 4,961598 | 4,561472 | 4,47548  | 4,059058 | 4,283988 |
| 7,348546 | 9,636487 | 6,754445 | 8,063952 | 6,911858 | 9,277804 | 7,661104 | 4,602195 | 8,470056 | 8,601381 | 9,053549 | 9,218628 | 6,835594 | 7,445586 |
| 7,52491  | 7,490402 | 7,430106 | 7,63487  | 7,070168 | 7,941942 | 6,931177 | 7,443501 | 7,091773 | 7,922979 | 7,271283 | 7,161651 | 7,251013 | 7,181771 |
| 6,636662 | 6,410202 | 6,380628 | 6,952782 | 6,606364 | 6,511916 | 7,039892 | 6,658831 | 6,176037 | 6,91113  | 6,205683 | 6,371102 | 6,159874 | 6,106384 |
| 5,625821 | 6,288411 | 5,65168  | 6,228878 | 5,993471 | 6,062669 | 5,525197 | 5,133601 | 5,593027 | 6,166742 | 6,005059 | 6,431586 | 5,431021 | 5,903199 |
| 10,66895 | 10,62305 | 9,391544 | 10,4598  | 9,431101 | 11,16766 | 10,37344 | 7,148929 | 11,0833  | 11,01418 | 10,95866 | 10,23986 | 9,5199   | 10,20326 |
| 4,805618 | 7,427183 | 4,628316 | 5,643449 | 5,12849  | 6,751031 | 4,282782 | 4,387057 | 6,102365 | 5,609302 | 7,164321 | 7,844603 | 4,860422 | 6,396837 |
| 7,408002 | 7,032395 | 7,028161 | 7,10397  | 6,178056 | 6,000613 | 6,027761 | 6,812567 | 7,070682 | 7,756908 | 7,393914 | 7,443781 | 7,096309 | 7,176758 |
| 7,5705   | 7,991238 | 7,082946 | 7,848731 | 7,459847 | 7,546111 | 7,342741 | 5,082192 | 7,366196 | 8,403959 | 7,585515 | 8,5782   | 6,154586 | 7,542639 |
| 3,478302 | 3,782845 | 3,674803 | 3,964647 | 4,272915 | 4,142169 | 3,171104 | 4,333596 | 3,383787 | 4,609309 | 3,881397 | 4,071326 | 3,596372 | 3,528474 |
| 8,072871 | 8,876801 | 8,232709 | 8,605534 | 7,549769 | 9,28512  | 8,327731 | 6,40894  | 8,381203 | 8,846689 | 8,463528 | 8,070025 | 7,23763  | 7,424657 |
| 7,556201 | 8,828621 | 7,660766 | 8,382233 | 7,846245 | 8,635957 | 7,38223  | 6,843706 | 7,686679 | 8,309934 | 8,153991 | 8,991522 | 7,791929 | 8,267605 |
| 6,383272 | 5,914321 | 5,760096 | 5,323064 | 5,616039 | 4,407055 | 4,442331 | 4,412138 | 6,029156 | 6,425968 | 6,27438  | 5,239886 | 5,078619 | 5,743788 |
| 6,177235 | 5,965368 | 5,720347 | 6,008169 | 4,817957 | 5,009395 | 4,868476 | 5,756642 | 5,986162 | 6,677862 | 6,322928 | 6,171803 | 5,662135 | 5,914963 |
| 6,778265 | 7,628198 | 7,104181 | 7,551569 | 7,228059 | 7,700392 | 6,792128 | 6,460012 | 6,520841 | 7,424338 | 7,220921 | 7,952502 | 7,191659 | 7,459316 |
| 7,877711 | 9,012707 | 7,652049 | 8,34327  | 7,979875 | 8,503389 | 7,990693 | 7,238335 | 7,988802 | 8,621469 | 8,490026 | 9,261876 | 7,637007 | 8,132068 |
| 3,283906 | 3,617883 | 3,352031 | 3,585953 | 3,779259 | 3,859114 | 2,84745  | 3,536433 | 3,345093 | 4,236691 | 3,180966 | 3,517082 | 3,194133 | 3,13385  |
| 3,615149 | 4,469246 | 4,235476 | 4,17911  | 4,108461 | 4,20836  | 3,997321 | 3,328986 | 4,519813 | 4,387132 | 3,923332 | 3,890495 | 3,012641 | 3,017037 |
| 7,26508  | 7,607563 | 7,078933 | 7,28655  | 7,150318 | 7,716251 | 6,520511 | 6,379762 | 7,063204 | 7,890897 | 7,444279 | 7,555765 | 6,611562 | 6,762743 |
| 7,595654 | 7,631815 | 7,448344 | 7,593157 | 6,794841 | 6,553897 | 7,050733 | 6,993971 | 7,76111  | 8,064698 | 7,918532 | 7,880297 | 6,86692  | 7,385928 |
| 7,405081 | 8,399345 | 7,658101 | 8,068764 | 7,597241 | 7,958214 | 7,462242 | 7,077648 | 8,10869  | 7,924558 | 7,797423 | 8,490698 | 7,541923 | 7,808672 |
| 9,54574  | 9,445204 | 9,214455 | 9,558452 | 8,637817 | 8,556777 | 8,395039 | 8,813577 | 9,437573 | 9,876498 | 9,625485 | 10,01679 | 8,388831 | 9,292379 |
| 4,289472 | 5,369504 | 4,554514 | 4,580156 | 4,787812 | 5,030351 | 4,496875 | 4,153533 | 4,76816  | 4,877152 | 4,879631 | 5,347634 | 4,063895 | 4,702097 |
| 9,299424 | 8,740424 | 8,172935 | 9,228624 | 8,384771 | 9,117999 | 9,205252 | 6,926206 | 9,067751 | 9,678005 | 9,019965 | 9,351484 | 7,657976 | 9,171818 |
| 5,59659  | 6,233642 | 6,093205 | 6,583636 | 6,447301 | 6,445493 | 5,352477 | 5,34875  | 5,682683 | 5,801999 | 5,907979 | 6,396453 | 5,495061 | 6,282956 |
| 6,233934 | 5,860472 | 6,019917 | 5,919456 | 5,715474 | 6,196941 | 5,923493 | 6,272848 | 5,735459 | 6,276724 | 5,877762 | 5,539388 | 6,208021 | 5,523815 |
| 8,693639 | 8,734325 | 8,452843 | 8,967298 | 8,805359 | 9,077006 | 8,244549 | 8,958208 | 8,203232 | 9,023898 | 8,632421 | 8,69112  | 8,364747 | 8,355553 |
| 9,460644 | 9,276395 | 9,072621 | 9,593323 | 9,332535 | 9,572791 | 9,099406 | 9,387748 | 8,904579 | 9,506227 | 9,189145 | 9,287788 | 8,740419 | 8,594773 |
| 9,988385 | 12,11512 | 9,685382 | 10,23795 | 9,926316 | 11,81451 | 9,487759 | 8,205105 | 11,03434 | 10,91451 | 11,61858 | 11,52629 | 7,777341 | 10,10218 |
| 6,061335 | 6,086592 | 5,022488 | 5,203205 | 4,897979 | 5,191154 | 3,95216  | 5,208831 | 5,365504 | 7,05481  | 6,383153 | 6,515613 | 5,086462 | 5,554208 |
| 8,605399 | 8,710051 | 8,355793 | 8,620613 | 8,750795 | 8,959414 | 8,222901 | 8,82195  | 8,139544 | 8,958552 | 8,646366 | 8,666642 | 7,980455 | 8,095408 |

|          |          |          |          |          |          |          |          |          |          |          |          |          |          |
|----------|----------|----------|----------|----------|----------|----------|----------|----------|----------|----------|----------|----------|----------|
| 8,346729 | 8,154492 | 7,899102 | 8,030282 | 7,3725   | 7,151098 | 6,975991 | 7,823102 | 7,986184 | 8,750706 | 8,556421 | 8,736596 | 7,484854 | 7,813551 |
| 3,743067 | 5,200955 | 4,221786 | 3,618504 | 3,847993 | 4,891734 | 3,199338 | 3,160394 | 4,590839 | 4,412798 | 3,952668 | 4,527789 | 3,298751 | 4,154777 |
| 12,16805 | 11,71992 | 11,56114 | 11,48425 | 11,48811 | 10,14621 | 10,74074 | 10,4459  | 11,82282 | 12,06684 | 12,0295  | 11,7761  | 10,68785 | 11,60508 |
| 6,034801 | 5,815979 | 6,163639 | 5,976651 | 6,330302 | 5,67744  | 5,008296 | 6,02755  | 5,749742 | 6,558638 | 6,579775 | 6,441495 | 5,770528 | 5,864807 |
| 11,84604 | 11,99193 | 12,08515 | 12,23216 | 11,95165 | 12,03895 | 11,58024 | 11,03886 | 11,55821 | 11,56095 | 11,71371 | 11,59784 | 10,71845 | 11,33011 |
| 9,123439 | 10,46651 | 9,497601 | 9,657519 | 9,406998 | 9,979545 | 9,116643 | 8,226871 | 9,869198 | 10,01264 | 9,739853 | 10,51938 | 8,931883 | 9,72559  |
| 7,954896 | 8,22908  | 8,203212 | 8,386043 | 7,774156 | 9,140988 | 8,351543 | 8,380751 | 8,032502 | 8,581753 | 8,240752 | 8,149706 | 7,73026  | 7,557785 |
| 6,439448 | 8,039695 | 6,331478 | 7,224355 | 6,61057  | 7,654487 | 6,484403 | 4,662447 | 6,696375 | 7,209698 | 6,98599  | 8,158545 | 5,662172 | 7,016928 |
| 4,853399 | 3,722953 | 5,071244 | 5,401731 | 5,354715 | 5,326475 | 4,216031 | 4,593618 | 4,880943 | 3,310489 | 3,584916 | 5,815565 | 4,397053 | 5,239943 |
| 7,167537 | 6,740041 | 6,478533 | 6,293117 | 6,233652 | 5,680045 | 5,817587 | 5,821435 | 6,759398 | 7,271333 | 6,841387 | 6,808292 | 6,108019 | 6,482872 |
| 5,885328 | 6,164256 | 5,55585  | 5,857997 | 5,30436  | 5,865761 | 5,309983 | 5,166754 | 5,685675 | 6,377867 | 5,813725 | 5,927217 | 5,366231 | 5,508211 |
| 6,339427 | 6,474236 | 6,355448 | 6,63471  | 6,620138 | 6,807331 | 6,180957 | 6,85257  | 6,079348 | 6,894653 | 6,403771 | 6,225521 | 6,228158 | 6,170398 |
| 7,6699   | 6,912132 | 3,65721  | 6,999399 | 6,95253  | 5,887348 | 6,307431 | 6,163758 | 7,113471 | 7,387974 | 7,476183 | 7,030313 | 5,987107 | 7,130988 |
| 11,84811 | 10,93664 | 10,91435 | 10,99115 | 11,05453 | 9,452373 | 10,06651 | 10,01432 | 10,92946 | 11,48649 | 11,38766 | 11,08695 | 10,34295 | 11,18353 |
| 3,094759 | 3,135611 | 3,561976 | 3,524123 | 3,238185 | 3,640241 | 3,276887 | 3,56088  | 3,856578 | 3,822664 | 3,904239 | 3,417854 | 4,305789 | 3,748849 |
| 6,338449 | 8,433566 | 6,711467 | 7,375956 | 6,85753  | 7,607127 | 6,503578 | 4,257485 | 7,3235   | 7,966347 | 7,612843 | 8,429306 | 5,032772 | 6,60635  |
| 5,483785 | 5,469719 | 5,250003 | 5,694291 | 5,436322 | 5,45321  | 5,00508  | 6,582106 | 5,032746 | 6,360891 | 6,091377 | 6,357394 | 5,020387 | 5,055209 |
| 9,950808 | 9,475102 | 9,816312 | 9,900237 | 10,05972 | 9,296534 | 8,800126 | 8,939993 | 9,193635 | 10,51972 | 9,733247 | 10,37044 | 8,392851 | 9,334215 |
| 9,424541 | 8,645128 | 8,167131 | 8,209995 | 8,384779 | 6,875705 | 6,826687 | 6,587125 | 8,312145 | 9,245585 | 8,960438 | 8,632804 | 7,042606 | 7,833007 |
| 6,044261 | 5,648859 | 5,343776 | 5,980256 | 5,675327 | 5,93306  | 5,382689 | 5,540057 | 4,920246 | 6,136599 | 5,529837 | 6,003863 | 5,19134  | 4,845173 |
| 6,583971 | 6,357905 | 6,035225 | 6,239103 | 5,699748 | 5,494433 | 4,973549 | 6,061019 | 5,961029 | 7,328292 | 6,800689 | 7,060993 | 6,007146 | 6,095975 |
| 6,24778  | 6,411546 | 6,182878 | 6,499602 | 6,34075  | 6,312654 | 5,954625 | 6,28961  | 6,187208 | 6,676995 | 6,2631   | 6,299416 | 5,935763 | 5,925446 |
| 5,301405 | 7,525244 | 5,774024 | 6,175293 | 5,392586 | 5,579416 | 9,459699 | 5,092916 | 7,590571 | 5,607171 | 6,063109 | 5,035062 | 4,793088 | 4,821099 |
| 6,54256  | 7,700154 | 6,922406 | 6,960229 | 7,214455 | 7,775323 | 6,253508 | 6,156056 | 6,842778 | 6,985927 | 7,641075 | 7,545627 | 5,59517  | 6,824578 |
| 6,310694 | 5,886047 | 6,287692 | 6,355065 | 6,497512 | 5,979383 | 5,750808 | 6,545439 | 5,914424 | 6,66812  | 6,472554 | 6,749026 | 6,122309 | 6,148038 |
| 5,145308 | 4,648245 | 4,448356 | 5,033028 | 4,175499 | 4,625361 | 4,456463 | 4,435209 | 4,423105 | 5,161252 | 4,606701 | 4,649072 | 4,465466 | 4,441433 |
| 7,204695 | 7,465686 | 7,159186 | 7,372846 | 6,980361 | 7,322067 | 8,084952 | 6,001993 | 7,752679 | 7,388752 | 7,432777 | 7,156255 | 5,565307 | 6,214955 |
| 3,208946 | 4,143849 | 3,792845 | 3,550787 | 3,754144 | 4,299875 | 3,435397 | 3,55208  | 4,442192 | 3,683955 | 4,61027  | 3,925358 | 2,406278 | 3,707764 |
| 6,745052 | 7,709178 | 6,685651 | 7,30871  | 7,028014 | 7,996414 | 5,577005 | 6,305434 | 6,964853 | 7,288302 | 7,908054 | 7,160429 | 5,327794 | 7,233691 |
| 5,31936  | 6,359389 | 5,597749 | 5,678911 | 5,670893 | 6,158598 | 5,105498 | 4,64178  | 5,670817 | 5,841621 | 6,099726 | 6,205726 | 4,046438 | 5,782858 |
| 7,092323 | 8,263786 | 7,580926 | 7,179878 | 7,350097 | 7,622578 | 6,098971 | 7,050239 | 7,571799 | 7,452031 | 7,647389 | 7,796621 | 4,915473 | 7,464923 |
| 6,796662 | 7,215962 | 7,415708 | 7,217137 | 7,406965 | 7,131277 | 6,462345 | 7,066737 | 6,824611 | 7,849803 | 7,315693 | 7,96525  | 6,395446 | 6,823791 |
| 7,746909 | 9,652324 | 6,391567 | 8,057245 | 7,478331 | 9,09699  | 7,48576  | 6,595075 | 8,514329 | 8,503919 | 8,828314 | 8,843534 | 6,311631 | 7,45774  |
| 2,729963 | 3,209859 | 3,558098 | 2,909359 | 3,265662 | 4,291424 | 2,990035 | 3,140793 | 3,811337 | 3,244766 | 4,641605 | 2,703676 | 2,940954 | 2,881625 |
| 6,007422 | 7,254078 | 6,611857 | 6,107984 | 6,431709 | 7,107368 | 4,94152  | 6,201265 | 6,577256 | 6,261512 | 6,672493 | 7,082704 | 4,012836 | 6,576367 |
| 5,0233   | 7,76861  | 4,845232 | 6,052002 | 5,15298  | 7,013156 | 4,784729 | 4,388178 | 6,399212 | 6,147003 | 7,265873 | 8,121842 | 5,074814 | 6,442967 |
| 7,433521 | 7,565051 | 6,919261 | 7,523616 | 7,073242 | 7,608436 | 7,283409 | 7,033522 | 7,522154 | 6,98927  | 7,58701  | 7,29532  | 6,878098 | 6,950886 |
| 8,815216 | 9,520518 | 8,33201  | 9,041924 | 8,427493 | 9,472305 | 8,33024  | 8,358335 | 8,932465 | 8,706427 | 9,006246 | 8,937357 | 8,379651 | 8,6152   |
| 3,648441 | 5,793567 | 4,368498 | 3,919656 | 3,957998 | 5,074135 | 3,065289 | 3,443661 | 4,934465 | 4,866722 | 5,019848 | 5,099499 | 3,548609 | 4,318479 |
| 4,42562  | 5,242246 | 4,929238 | 5,379415 | 5,112349 | 4,978539 | 3,633604 | 3,978111 | 4,428714 | 4,590381 | 4,689362 | 4,677906 | 4,327171 | 4,882411 |
| 5,414695 | 5,267946 | 5,315351 | 5,328031 | 5,409969 | 5,202497 | 4,659785 | 5,215347 | 5,301737 | 5,874178 | 5,619205 | 5,462334 | 5,172303 | 5,003801 |
| 4,382198 | 3,771989 | 3,291343 | 3,400668 | 3,559024 | 4,782944 | 3,319686 | 1,886942 | 3,737411 | 4,114185 | 4,081524 | 3,60745  | 2,77283  | 3,605752 |
| 4,410409 | NA       | 5,181922 | 4,837714 | 4,510881 | 5,022891 | 4,405871 | 4,772417 | 4,94793  | 5,124547 | 3,840785 | 4,329122 | 4,652987 | 5,178388 |
| 2,585619 | 3,39137  | 2,890966 | 2,812101 | 2,814296 | 3,313955 | 2,291106 | 2,14911  | 2,739196 | 2,811782 | 3,190792 | 3,394551 | 2,371484 | 3,132922 |
| 1,530715 | NA       | 1,914801 | 1,753575 | 2,41138  | 3,09672  | 1,159421 | 2,638797 | 1,908302 | 3,460083 | 2,169409 | 2,254384 | 2,026468 | 1,89582  |
| 6,531723 | 6,490048 | 6,355043 | 6,992349 | 5,656979 | 7,211651 | 6,601503 | 6,413379 | 6,627051 | 7,352009 | 6,739368 | 6,138005 | 5,311936 | 6,59398  |
| 5,114637 | 5,751126 | 6,044493 | 5,936209 | 5,290254 | 7,651832 | 5,777911 | 5,46928  | 6,316124 | 6,768353 | 6,190014 | 5,337881 | 5,338406 | 5,522515 |



|          |          |          |          |           |          |          |           |          |          |          |          |          |           |
|----------|----------|----------|----------|-----------|----------|----------|-----------|----------|----------|----------|----------|----------|-----------|
| 6,016294 | 5,915041 | 6,098305 | 6,36769  | 5,606896  | 6,881754 | 6,429937 | 5,889032  | 5,907737 | 6,427326 | 5,983711 | 5,888853 | 5,88287  | 5,530832  |
| 5,892138 | 6,390721 | 5,439244 | 6,025286 | 5,692482  | 6,136284 | 5,688242 | 5,497199  | 6,094657 | NA       | 6,003751 | 5,790287 | 5,264671 | 5,565932  |
| 4,847286 | 5,437395 | 4,712659 | 6,143007 | 4,801683  | 5,556433 | 4,829228 | 4,870886  | 5,12295  | 4,753848 | 5,016403 | 4,738037 | 5,386184 | 4,755827  |
| 6,542972 | 6,986392 | 6,076535 | 5,399107 | 5,956714  | 5,40396  | NA       | 4,697845  | 6,792588 | 7,142834 | 7,397183 | 5,834841 | 4,42344  | 6,169525  |
| 6,037182 | 6,778114 | 5,646096 | 5,67027  | 5,718819  | 5,101826 | NA       | 4,2628    | 6,030387 | 6,706237 | 6,054471 | 5,983449 | 5,355766 | 6,083627  |
| 6,755031 | 6,38017  | 5,87646  | 5,784174 | 5,387718  | NA       | 6,565186 | 4,811203  | 6,489734 | 6,745891 | 6,315372 | 6,091484 | 5,213315 | 5,940787  |
| 4,89889  | 10,52333 | 5,531236 | 11,60857 | 4,405333  | 10,6652  | 4,245872 | 7,654294  | 7,594574 | 5,887636 | 10,18093 | 4,630604 | NA       | 3,869867  |
| 8,566339 | 9,146029 | 7,584246 | 8,358784 | 8,269797  | 8,880206 | 7,577494 | NA        | 8,785383 | 9,721107 | 8,890462 | 8,381112 | 4,72348  | 8,104298  |
| NA       | 4,787839 | 4,62367  | 4,766583 | 4,408234  | 4,91931  | 4,3423   | 4,169687  | NA       | 5,293726 | 4,648349 | 4,644545 | 4,316143 | 4,400016  |
| 5,735449 | 5,50328  | 5,355054 | 5,573161 | 5,578402  | 5,456736 | NA       | 5,327106  | 5,122221 | 5,997864 | 5,336641 | 5,536856 | 5,217196 | 5,378541  |
| 7,816936 | 8,766914 | 8,060336 | 8,176911 | 8,340702  | 6,920358 | 7,378341 | 7,373662  | 8,351504 | 8,470072 | 8,508441 | 8,792197 | NA       | 8,283932  |
| 4,38432  | 4,313117 | 3,871603 | 4,146353 | 2,854803  | 3,577864 | 3,375441 | 2,966416  | 3,97864  | 4,584836 | 3,730869 | 3,59691  | 3,218524 | 3,920076  |
| 4,353201 | 5,912162 | 3,7893   | 5,115276 | 4,308695  | 4,925861 | 4,494049 | 4,105301  | 4,75383  | 4,18309  | 4,515206 | 4,839712 | 3,872344 | 4,137054  |
| 4,639778 | 6,025787 | 3,129776 | 5,885269 | 4,335519  | 5,493075 | NA       | 3,167228  | 4,852723 | 4,442397 | 5,473826 | 6,076703 | 3,234185 | 3,723774  |
| 5,167875 | 7,223185 | 6,283298 | 5,116061 | 5,017703  | 6,830509 | 4,941393 | 6,018117  | 6,433362 | 6,230319 | 5,799003 | 5,937354 | NA       | 6,376278  |
| 4,101323 | 4,763242 | 3,713059 | 4,245121 | 4,383604  | 4,224831 | 2,155019 | 2,026786  | 3,726644 | 5,249689 | 4,180167 | 4,696023 | 2,455299 | 3,18162   |
| 5,575602 | 6,530946 | 5,934386 | 6,699772 | 6,104237  | 6,395212 | 5,952013 | 5,382874  | NA       | 6,28957  | 6,332354 | 6,578466 | NA       | 6,298604  |
| 5,681552 | 7,487208 | 7,028986 | NA       | 5,857672  | 7,482918 | 5,98182  | 6,855667  | 7,002353 | 6,566184 | 6,5861   | 6,665083 | NA       | 6,874881  |
| 5,64357  | 6,881462 | 5,568613 | 6,517313 | 5,983349  | 6,479743 | 5,870137 | NA        | 6,241881 | 6,467878 | 6,240889 | 7,138004 | 3,9749   | 6,05797   |
| 4,911556 | 5,328195 | 4,384862 | 3,666441 | 4,593507  | 5,114954 | NA       | 4,196156  | 4,957721 | 4,963373 | 4,905056 | 5,166975 | 3,729075 | 4,479834  |
| NA       | 5,10884  | 4,659401 | 4,924097 | 4,742312  | 5,232033 | NA       | 4,73108   | 4,799685 | 5,347665 | 4,94601  | 4,863015 | 4,589426 | 4,51543   |
| 3,159365 | 5,488734 | 3,813446 | 3,495299 | 3,604941  | 4,677753 | 3,441357 | 3,19561   | 4,427399 | 4,471849 | 4,110878 | 3,966793 | NA       | 4,079342  |
| 6,812356 | 8,19678  | 4,519307 | 7,556297 | 7,251276  | 6,94191  | 7,213099 | 5,044782  | 5,381922 | 5,516357 | 6,152616 | 7,970835 | NA       | 5,122132  |
| 7,374461 | 7,197659 | 6,566022 | 7,403428 | 6,697633  | 7,087682 | 6,924409 | 6,5143    | 7,055804 | NA       | 7,198942 | 7,202791 | NA       | 6,510404  |
| 4,38333  | 4,777709 | 3,976298 | 4,687003 | 4,551243  | 4,509218 | 3,888469 | 3,466136  | NA       | 4,555355 | 4,530367 | 4,989529 | 3,972075 | 4,410431  |
| 4,39139  | 4,463215 | 4,253742 | 5,185257 | 4,564211  | 4,819721 | 4,055817 | 3,614167  | 3,796308 | 4,327302 | NA       | 5,253622 | 3,838997 | 4,542296  |
| 2,815134 | 5,383822 | 4,444215 | 2,881398 | 4,021704  | 4,973444 | 4,13247  | 3,252677  | 4,805542 | 4,932508 | 5,027624 | 4,691351 | 3,599942 | 4,685102  |
| 3,79847  | 5,564341 | 3,562914 | 4,356972 | 3,25418   | 4,405156 | 3,630678 | 3,514926  | 4,440243 | 4,077019 | 4,273761 | 3,719348 | 4,097721 | 3,548368  |
| 1,435311 | 2,163698 | 1,628153 | 1,914032 | 0,9966404 | 2,865464 | 1,836288 | 0,8442584 | 2,273061 | 1,548566 | 3,095836 | 1,294877 | 1,512324 | 0,7801884 |
| 1,658264 | 2,094449 | 2,018856 | 2,146476 | 1,724824  | 2,488216 | 1,576658 | 2,157045  | 2,331034 | 2,637502 | 2,652177 | 2,215781 | 1,213813 | 2,23215   |
| 5,955807 | 5,829107 | 5,284404 | 5,896402 | NA        | 5,942456 | 5,814184 | 5,026388  | 6,267338 | 6,735496 | 6,141679 | 5,869601 | 4,760827 | 6,063959  |
| 6,973222 | 8,693915 | 6,102242 | NA       | 6,575204  | 7,746759 | 6,60758  | NA        | 7,907134 | 7,654823 | 8,490779 | 8,931726 | NA       | 7,695622  |
| 5,085567 | NA       | 5,988833 | 6,837881 | 2,918416  | 6,899918 | 4,308808 | 5,15866   | 4,571747 | 6,463633 | NA       | 7,546377 | 6,671311 | 7,660846  |
| 6,929089 | 6,432113 | 6,132954 | 6,667966 | 6,080893  | 5,204744 | NA       | 6,145052  | 6,48269  | 7,325993 | 6,729061 | 6,921615 | 5,955881 | 6,291669  |
| 6,152537 | 6,187135 | 5,664989 | 6,145258 | 5,859119  | 5,729717 | NA       | 5,187596  | 5,575949 | 6,234654 | 5,737549 | 6,101517 | 5,19903  | 5,585389  |
| 2,304355 | 3,535625 | 2,533079 | 2,788348 | 3,204319  | 3,667884 | 2,04986  | 3,692677  | 2,531612 | 3,589813 | 2,747141 | 3,076547 | 2,414278 | 1,0229    |
| 3,933142 | 4,68243  | 4,253262 | 4,426023 | 3,76346   | 5,052639 | 4,05529  | 3,683897  | 3,848459 | 5,065094 | 4,705814 | 3,968347 | 3,519926 | 4,687294  |
| 4,763483 | 4,945902 | 4,887059 | 5,186967 | 5,060463  | 5,214525 | 4,834881 | 4,665926  | 4,95312  | NA       | 5,025601 | NA       | 4,149827 | 4,81641   |
| 7,821684 | 8,332781 | 6,591246 | 7,2564   | 6,532987  | 7,564076 | 6,606827 | 4,947024  | 7,955168 | 8,013999 | 8,804779 | 8,120154 | NA       | 6,418349  |
| 1,776767 | 3,922044 | 2,979597 | 2,555611 | 2,638429  | 3,587589 | NA       | 1,820793  | 3,021611 | 3,254662 | 3,631138 | 3,14715  | 1,586731 | 3,315984  |
| 2,417042 | 3,542659 | 2,803134 | 4,085531 | 3,684892  | 3,894423 | 3,266888 | 1,505842  | NA       | 3,282597 | 3,017881 | 4,494412 | 4,020545 | 3,356778  |
| 5,322627 | 4,698915 | 4,615712 | 5,609938 | 5,127156  | 4,153883 | 6,692278 | 5,798666  | 4,48044  | 5,748678 | 5,663111 | 5,909514 | 4,385217 | 4,296031  |
| 2,243784 | 3,309907 | 2,843614 | 2,758614 | 2,710871  | 3,452258 | 2,600168 | 2,910457  | NA       | 3,376018 | 2,98104  | 2,81472  | 2,727751 | 2,315708  |
| 2,929529 | 3,493857 | 3,037152 | 3,602421 | 3,415965  | 3,557747 | NA       | 3,014961  | 2,977983 | 4,022093 | 3,441976 | 2,981374 | 2,875622 | 3,21091   |
| 4,870452 | 5,40328  | 3,932128 | 5,290197 | 4,317368  | 4,472036 | 4,906816 | 4,099471  | 4,726235 | 4,324589 | 4,843023 | 4,51967  | NA       | 3,911126  |
| 3,833361 | 4,692763 | 2,591105 | 2,99475  | 2,926357  | 3,545176 | 2,106239 | 2,372734  | 3,665211 | 2,873205 | 3,95319  | 3,690625 | NA       | 2,695404  |
| 5,620943 | 7,840505 | 6,674886 | 5,595315 | 5,721458  | 7,400166 | 4,586746 | 4,583397  | 7,533392 | 7,383608 | 7,452811 | 7,084227 | 4,637558 | 4,763109  |



| LDOPA-INTACT5   | LDOPA-INTACT6   | LDOPA-LESION1   | LDOPA-LESION2   | LDOPA-LESION3   | LDOPA-LESION4   | LDOPA-LESION5   | LDOPA-LESION6   |
|-----------------|-----------------|-----------------|-----------------|-----------------|-----------------|-----------------|-----------------|
| Int (log2)<br>6 | Int (log2)<br>2 | Int (log2)<br>5 | Int (log2)<br>7 | Int (log2)<br>3 | Int (log2)<br>6 | Int (log2)<br>2 | Int (log2)<br>4 |
| 9,885947        | 10,76049        | 10,85833        | 10,91014        | 11,32906        | 11,0997         | 11,14998        | 10,3959         |
| 3,51812         | 4,491448        | 4,140881        | 4,692716        | 4,711976        | 4,735552        | 4,767902        | 4,310291        |
| 4,043838        | 5,352244        | 5,813304        | 6,216775        | 7,044176        | 6,079573        | 6,358188        | 5,367965        |
| 5,317078        | 6,659521        | 6,086465        | 6,639131        | 6,417645        | 6,476125        | 6,660493        | 6,338637        |
| 2,762077        | 4,345745        | 4,703236        | 4,456526        | 4,724795        | 3,591114        | 4,987451        | 3,057246        |
| 2,584296        | 3,600655        | 3,314923        | 4,02284         | 3,932763        | 3,966763        | 4,154996        | 3,39168         |
| 6,224526        | 7,001047        | 6,823992        | 7,291667        | 7,274563        | 7,036348        | 7,372444        | 6,815014        |
| 2,116495        | 3,667768        | 3,829477        | 4,027775        | 4,513908        | 4,188065        | 4,561279        | 3,280731        |
| 9,700371        | 10,54243        | 10,20828        | 10,48019        | 10,35107        | 10,36292        | 10,43799        | 10,44945        |
| 8,42672         | 8,757209        | 9,255165        | 10,24679        | 10,02985        | 9,789801        | 9,383235        | 9,84817         |
| 4,163857        | 5,80714         | 4,997362        | 5,227145        | 5,748731        | 5,101462        | 5,835339        | 5,460188        |
| 7,767013        | 9,71242         | 10,17705        | 9,644778        | 10,10139        | 9,716249        | 9,904689        | 10,34102        |
| 5,989723        | 5,60732         | 6,07746         | 6,25408         | 4,93306         | 6,551195        | 5,809312        | 5,617749        |
| 11,91099        | 12,64727        | 12,41145        | 12,75177        | 12,78075        | 12,70759        | 12,7009         | 12,81905        |
| 3,639049        | 5,174597        | 4,346089        | 5,10343         | 4,902087        | 4,954896        | 5,070545        | 4,739649        |
| 7,32006         | 7,060048        | 7,961743        | 8,227065        | 7,905732        | 8,629936        | 7,844557        | 8,437237        |
| 4,219401        | 4,565985        | 4,782145        | 5,240048        | 5,150293        | 5,296594        | 5,576948        | 5,210427        |
| 1,800485        | 4,302948        | 4,143168        | 5,327883        | 5,332418        | 5,304385        | 5,556271        | 4,937493        |
| 3,349289        | 2,496965        | 3,525433        | 4,486339        | 3,748003        | 3,751638        | 3,931713        | 4,27634         |
| 6,10653         | 7,003886        | 6,029831        | 6,998102        | 6,860257        | 7,376002        | 7,634034        | 6,108908        |
| 2,652297        | 5,827917        | 5,027049        | 5,927562        | 5,78783         | 6,208408        | 6,693084        | 5,901544        |
| 4,531719        | 5,589386        | 5,788415        | 7,310112        | 7,463448        | 6,702591        | 6,271408        | 6,871115        |
| 12,21049        | 13,30737        | 13,11146        | 13,09375        | 13,31435        | 13,05182        | 13,47519        | 13,29659        |
| 8,515521        | 8,759486        | 9,355871        | 10,3951         | 10,07165        | 9,959368        | 9,505941        | 9,877695        |
| 5,768057        | 6,554141        | 6,364297        | 6,484322        | 6,373028        | 6,687696        | 6,388359        | 6,252123        |
| 4,191721        | 4,979128        | 5,286269        | 4,890806        | 4,955885        | 4,320566        | 5,004569        | 4,063056        |
| 12,06876        | 12,82701        | 12,61261        | 12,85337        | 12,92388        | 12,80734        | 12,88385        | 12,94318        |
| 3,929951        | 4,757768        | 5,106129        | 4,628318        | 4,498476        | 4,241289        | 4,696482        | 3,691753        |
| 3,023865        | 4,395735        | 4,191123        | 4,722512        | 4,674156        | 4,794763        | 5,200181        | 4,566803        |
| 6,365735        | 5,315971        | 5,665505        | 6,426401        | 5,774032        | 6,822936        | 6,238353        | 5,761416        |
| 3,093869        | 4,125503        | 4,694842        | 5,928229        | 5,624707        | 5,344695        | 5,000059        | 5,306722        |
| 3,797186        | 5,421694        | 5,826091        | 6,558703        | 6,048748        | 6,738251        | 6,743814        | 5,954832        |
| 5,721462        | 5,916843        | 6,438311        | 6,92468         | 6,198912        | 6,812296        | 6,918889        | 6,638575        |
| 4,363266        | 5,201595        | 5,912988        | 7,131969        | 6,92823         | 6,567522        | 6,058445        | 6,83574         |
| 5,682238        | 5,817719        | 5,943699        | 6,46755         | 6,085583        | 6,396995        | 6,082465        | 6,23444         |
| 4,67803         | 6,012041        | 5,580679        | 5,960797        | 5,959201        | 6,084485        | 6,463173        | 5,619885        |
| 5,121511        | 5,163878        | 5,470275        | 4,782844        | 5,121345        | 5,076814        | 5,343227        | 4,42633         |
| 5,771379        | 6,634254        | 6,290694        | 6,427774        | 6,452456        | 6,589928        | 6,921633        | 6,638657        |
| 6,01188         | 6,700691        | 6,625521        | 6,749775        | 6,638302        | 6,612058        | 7,053847        | 6,210695        |
| 6,948993        | 7,829171        | 7,50076         | 7,74379         | 7,578132        | 7,782659        | 7,93657         | 7,871072        |
| 10,59998        | 12,2295         | 11,87355        | 12,19369        | 12,62362        | 12,04471        | 12,71405        | 12,656          |

| SAL-INTACT1     | SAL-INTACT2     | SAL-INTACT3     | SAL-INTACT4     | SAL-INTACT5     |
|-----------------|-----------------|-----------------|-----------------|-----------------|
| Int (log2)<br>4 | Int (log2)<br>2 | Int (log2)<br>5 | Int (log2)<br>1 | Int (log2)<br>3 |
| 10,5475898      | 9,8985362       | 10,4038892      | 10,3824715      | 10,878878       |
| 4,48995168      | 3,74668647      | 4,96089451      | 3,77293229      | 4,60032061      |
| 6,12359449      | 4,83731937      | 5,99204212      | 6,33114438      | 6,08400287      |
| 6,41656368      | 6,33633578      | 5,74774213      | 3,43920252      | 6,66118471      |
| 4,32583486      | 3,61936412      | 5,26239515      | 3,67496502      | 4,58321717      |
| 3,83256564      | 3,09116166      | 4,20833038      | 2,95180458      | 3,9575275       |
| 7,2411247       | 6,28435469      | 7,11881208      | 6,63079599      | 7,15986742      |
| 4,01736113      | 3,31743679      | 4,22706385      | 4,07445179      | 4,24138085      |
| 10,2533897      | 10,1103258      | 9,62656699      | 7,69806619      | 10,2473831      |
| 8,96777135      | 8,18030028      | 8,5761537       | 8,96276189      | 9,16306079      |
| 5,05135822      | 5,40222893      | 4,64599054      | 5,41028482      | 5,4179566       |
| 10,0573375      | 11,0777344      | 9,3883638       | 9,56418988      | 10,1940001      |
| 5,45040484      | 5,27288829      | 5,94671148      | 4,8084343       | 5,71556996      |
| 12,0268125      | 11,8100891      | 11,6243461      | 11,8214493      | 12,2648148      |
| 4,82194849      | 4,89420374      | 4,21626629      | 1,69007685      | 5,07721357      |
| 7,47130412      | 6,67449636      | 7,49740129      | 6,87891248      | 7,76779597      |
| 5,56211951      | 4,61847969      | 5,02863686      | 3,94852845      | 4,86866205      |
| 4,58687057      | 4,42503428      | 4,69507252      | 4,5560478       | 4,84693398      |
| 3,24689258      | 2,86106594      | 4,1359693       | 3,53428185      | 3,71121118      |
| 6,95384432      | 6,59614443      | 7,06382408      | 6,6971049       | 6,68921909      |
| 5,32619783      | 5,55670783      | 5,65337409      | 5,21227205      | 5,76050089      |
| 5,48670243      | 4,783603        | 5,23817019      | 6,24445708      | 5,92501451      |
| 12,665632       | 12,5797001      | 12,1723808      | 12,5150184      | 12,8978661      |
| 8,97696082      | 8,28876823      | 8,62363369      | 9,01387262      | 9,20784083      |
| 7,06402898      | 7,01261504      | 6,41753186      | 5,90983292      | 6,74693728      |
| 5,22789893      | 4,11710144      | 5,84359627      | 4,76103237      | 5,22662525      |
| 12,2715777      | 12,0748866      | 11,7134313      | 11,9473158      | 12,509513       |
| 5,02615982      | 4,39053631      | 5,4960741       | 4,28878329      | 4,95414889      |
| 4,58228146      | 4,51565325      | 4,36856421      | 4,41167445      | 4,621838        |
| 5,74638156      | 5,54837961      | 5,50628595      | 5,49024323      | 5,50533675      |
| 4,5795983       | 3,98230548      | 4,5535151       | 5,09254059      | 4,73794058      |
| 5,67784486      | 5,04041215      | 5,86460835      | 5,38886963      | 5,89548256      |
| 6,74739703      | 5,95772385      | 6,28958817      | 5,89142572      | 6,45939314      |
| 5,77687033      | 4,8773155       | 5,62894498      | 6,07655401      | 5,88568096      |
| 5,79428084      | 5,59140968      | 5,99773954      | 5,69807478      | 5,64991597      |
| 6,30980374      | 5,56310155      | 6,15410705      | 5,77821095      | 6,03486488      |
| 5,30178506      | 4,68047587      | 5,78484178      | 4,96816312      | 5,45539873      |
| 6,45800351      | 6,53479711      | 6,22321602      | 5,9355935       | 6,56839223      |
| 7,08313169      | 6,5816664       | 6,97065329      | 6,40671179      | 6,72865134      |
| 7,63395093      | 7,64696181      | 7,42252803      | 7,00077523      | 7,72429902      |
| 11,7923411      | 11,7678056      | 11,1133077      | 11,9967634      | 11,9073622      |

|           |          |          |          |          |          |          |          |            |            |            |            |            |
|-----------|----------|----------|----------|----------|----------|----------|----------|------------|------------|------------|------------|------------|
| 2,502548  | 5,797118 | 4,7624   | 6,647133 | 6,03475  | 6,25667  | 7,062553 | 6,072039 | 5,99038364 | 5,57311943 | 5,96889496 | 5,8415342  | 5,5085255  |
| 8,898696  | 10,36694 | 9,965338 | 10,08477 | 9,968112 | 10,03999 | 10,25719 | 9,914603 | 10,1228413 | 10,290482  | 9,80562879 | 9,42241781 | 10,2367255 |
| 6,796927  | 8,071839 | 8,818488 | 7,981946 | 7,716357 | 8,366111 | 8,918283 | 7,674421 | 7,38167251 | 7,24511074 | 6,02664921 | 7,63322778 | 7,89437681 |
| 6,677524  | 7,541706 | 8,509306 | 7,611952 | 7,874338 | 7,796758 | 8,818797 | 6,689114 | 7,72712071 | 6,6360456  | 7,58031833 | 7,13882361 | 7,41917503 |
| 3,248463  | 4,564224 | 4,330801 | 4,174725 | 4,50311  | 4,282106 | 4,807075 | 4,781721 | 4,17721321 | 4,23610861 | 4,08147963 | 4,46956898 | 4,50351088 |
| 4,549787  | 5,378927 | 6,182816 | 7,19916  | 6,981797 | 6,672297 | 6,239031 | 6,515655 | 5,21616224 | 4,76699124 | 5,60855158 | 6,15420989 | 5,62130363 |
| 5,195282  | 5,887507 | 6,52392  | 7,550163 | 7,005055 | 7,327967 | 6,753169 | 7,097927 | 5,90848742 | 5,3062291  | 6,06298843 | 6,10193115 | 6,41574529 |
| 3,913582  | 4,755646 | 4,991403 | 6,287506 | 6,31291  | 5,852439 | 5,492    | 5,813852 | 4,62257378 | 4,04271347 | 4,91265498 | 5,78937458 | 4,87828902 |
| 3,081829  | 4,799923 | 4,180053 | 5,486276 | 4,888907 | 5,425955 | 5,570984 | 5,448412 | 4,62184158 | 5,11903777 | 5,05221906 | 4,49887084 | 5,04368809 |
| 3,92694   | 5,060812 | 4,745893 | 4,942949 | 4,903383 | 5,084853 | 5,341691 | 5,365592 | 4,73138592 | 4,77364842 | 4,83503598 | 5,17592394 | 5,17727563 |
| 1,781925  | 4,219271 | 3,482388 | 4,053355 | 3,744568 | 3,87677  | 4,600857 | 4,01751  | 3,69344379 | 3,86798468 | 3,65150131 | 3,45731748 | 3,82931527 |
| 4,455425  | 5,51834  | 6,043666 | 7,048774 | 6,643864 | 6,758011 | 6,534942 | 6,945507 | 6,10682993 | 5,5595109  | 5,98180976 | 6,45334311 | 5,9767519  |
| 5,65666   | 6,554181 | 5,526995 | 6,45036  | 6,281629 | 6,761242 | 7,122681 | 5,585326 | 6,38436957 | 6,40750083 | 6,68045835 | 6,2343898  | 6,24567984 |
| 3,216623  | 2,52733  | 3,561533 | 4,494046 | 4,251616 | 3,808984 | 3,813961 | 3,839355 | 6,38436957 | 3,98351888 | 3,28515167 | 3,92858264 | 4,11938383 |
| 9,839332  | 10,75706 | 10,5421  | 10,92883 | 10,86931 | 10,89742 | 11,09344 | 11,09098 | 10,2177643 | 10,2932749 | 10,0572478 | 10,2258829 | 10,5376064 |
| 3,441063  | 4,457355 | 4,599137 | 4,452064 | 4,44334  | 4,870162 | 4,955069 | 4,684772 | 4,43316762 | 4,7178486  | 4,66538281 | 4,15007039 | 5,07496816 |
| 4,540984  | 4,96349  | 4,853823 | 5,730351 | 5,663902 | 6,258249 | 6,042081 | 5,536473 | 5,64809109 | 5,57432873 | 5,30114938 | 4,7125797  | 5,62181895 |
| 6,133795  | 7,241081 | 6,42457  | 6,804529 | 7,268003 | 6,855588 | 6,57329  | 6,674088 | 5,11990336 | 5,84382477 | 6,50696916 | 5,93056684 | 4,80961996 |
| 7,053225  | 9,187976 | 8,736655 | 8,987728 | 9,024769 | 8,854801 | 9,196033 | 8,892039 | 9,17086329 | 9,35266444 | 8,67804669 | 8,55453873 | 9,20456477 |
| 6,919209  | 8,075    | 7,971559 | 9,066309 | 8,558674 | 8,758324 | 8,488964 | 8,685865 | 7,91353997 | 7,538856   | 7,77312491 | 8,0773877  | 8,13641775 |
| 7,993003  | 5,407737 | 8,464437 | 8,694881 | 9,270342 | 8,864646 | 5,224129 | 9,104527 | 8,18531017 | 8,2760832  | 7,80185895 | 8,57930161 | 8,59575837 |
| 8,016654  | 9,044978 | 8,685331 | 8,972551 | 9,477229 | 8,815907 | 8,97992  | 9,112466 | 8,06962139 | 8,05747718 | 8,09631871 | 8,64198082 | 8,13801971 |
| 6,627784  | 7,35728  | 7,541936 | 8,433959 | 7,760951 | 8,41785  | 8,455935 | 7,791085 | 7,42844209 | 7,04804303 | 7,56483786 | 7,07956004 | 7,58028827 |
| 4,329998  | 5,19854  | 5,046257 | 5,736256 | 4,892233 | 5,551735 | 5,293052 | 5,084452 | 5,40274274 | 5,42647721 | 5,39688584 | 4,73534997 | 5,3391367  |
| 2,930801  | 4,739694 | 4,561001 | 5,081056 | 5,210196 | 5,090667 | 5,077382 | 4,145019 | 4,67650594 | 4,44633613 | 4,71896674 | 4,38692925 | 4,89379429 |
| 7,716669  | 8,926928 | 8,251963 | 8,830353 | 8,681615 | 9,11226  | 9,503592 | 8,706311 | 8,34644008 | 4,34783486 | 8,75008951 | 8,24258804 | 8,63289302 |
| 9,235586  | 9,770009 | 9,576768 | 10,10832 | 9,409069 | 10,10826 | 9,621135 | 9,592592 | 9,61974327 | 9,43751622 | 9,46774614 | 8,66464592 | 9,68407895 |
| 3,140364  | 4,141654 | 5,036999 | 6,496918 | 6,166097 | 6,145929 | 5,215287 | 6,269994 | 4,37920733 | 4,10942302 | 4,97704716 | 6,22086036 | 4,708774   |
| 4,622349  | 5,436962 | 5,787868 | 7,151237 | 6,502546 | 6,985582 | 6,375237 | 6,677599 | 5,87898303 | 5,22808291 | 6,38487087 | 6,24475211 | 6,05381229 |
| 3,435678  | 4,226967 | 4,063443 | 4,903199 | 4,684622 | 5,125513 | 5,109198 | 4,626465 | 4,35944274 | 3,71146236 | 4,62561765 | 4,31650204 | 4,75866173 |
| 7,455829  | 8,899096 | 9,232433 | 8,848769 | 9,089783 | 8,732283 | 9,580099 | 8,01042  | 8,85821107 | 8,32443361 | 8,81575739 | 8,32237893 | 8,60757381 |
| 2,970441  | 5,02444  | 4,179609 | 4,663204 | 5,067362 | 4,394505 | 5,339441 | 5,062835 | 4,61350899 | 4,87114893 | 4,31956603 | 5,26881708 | 4,72142459 |
| 5,400105  | 6,660078 | 7,356262 | 6,893407 | 6,977741 | 6,814639 | 7,444345 | 5,932474 | 6,93482974 | 6,30892881 | 7,14148053 | 6,36732032 | 6,60871467 |
| 6,470524  | 8,431395 | 8,279949 | 7,321474 | 8,641022 | 7,1492   | 9,122925 | 9,383261 | 7,4454579  | 8,09463486 | 7,39601644 | 9,22201223 | 7,40576902 |
| 6,667762  | 7,634899 | 8,140719 | 9,179108 | 8,805275 | 8,888225 | 8,493183 | 8,759882 | 7,77052651 | 7,35848848 | 7,73619018 | 8,14803827 | 7,98231975 |
| 2,539865  | 4,911836 | 3,862563 | 4,389901 | 4,846036 | 3,94155  | 5,269633 | 4,821973 | 4,51244912 | 4,67594218 | 4,08419417 | 5,01164125 | 4,36346423 |
| 7,019635  | 8,142416 | 9,054352 | 8,248718 | 8,311852 | 8,463716 | 9,726393 | 7,398625 | 8,26217946 | 7,35993238 | 8,07914265 | 7,69944454 | 7,77834161 |
| 7,431796  | 8,437918 | 8,451931 | 8,791791 | 8,579501 | 9,11732  | 9,130574 | 8,534204 | 8,5994582  | 7,58291569 | 8,70886679 | 8,03613112 | 8,52925121 |
| 5,31116   | 6,195523 | 5,364409 | 5,828495 | 5,99058  | 6,126858 | 6,429639 | 5,751935 | 5,83125343 | 6,03495865 | 6,0757294  | 5,48684062 | 6,02656465 |
| 0,1897507 | 2,355036 | 2,138059 | 3,250211 | 2,750969 | 3,451803 | 3,768626 | 3,419222 | 3,82717589 | 3,09939307 | 2,60597598 | 2,83574469 | 3,40482877 |
| 7,942037  | 9,736948 | 9,81709  | 10,49005 | 10,5798  | 10,15858 | 10,54937 | 10,4841  | 9,69441597 | 9,4027641  | 9,22512302 | 10,0199769 | 9,74043907 |
| 4,965311  | 7,174921 | 7,526689 | 7,20903  | 7,736475 | 7,011585 | 8,00498  | 6,523702 | 7,36198385 | 6,9473829  | 7,19996846 | 7,30982309 | 6,9771381  |
| 9,378985  | 10,14131 | 10,27802 | 10,82636 | 10,78198 | 10,89899 | 10,76575 | 10,88121 | 9,9744147  | 9,6079217  | 9,78216515 | 10,1860679 | 10,1596452 |
| 5,088387  | 6,121472 | 5,320985 | 6,640593 | 5,872688 | 6,636511 | 6,891898 | 6,178199 | 5,70332077 | 6,18337711 | 6,54695541 | 5,97580584 | 6,22136281 |
| 12,33074  | 12,65735 | 12,96886 | 12,54615 | 12,42893 | 12,39363 | 12,82248 | 11,73009 | 12,2267084 | 11,3821343 | 12,5393924 | 11,6521753 | 12,3398832 |
| 6,75891   | 7,415183 | 7,463419 | 8,438725 | 7,806596 | 8,052792 | 8,425346 | 7,804291 | 7,72915511 | 6,98961143 | 7,56862396 | 7,4253134  | 7,79695116 |
| 6,059917  | 6,150704 | 6,477029 | 5,585328 | 5,83709  | 5,7355   | 6,225278 | 5,539053 | 6,24538272 | 5,84204202 | 6,56129747 | 5,5645449  | 6,26629849 |

|          |          |          |          |          |          |          |          |            |            |            |            |            |
|----------|----------|----------|----------|----------|----------|----------|----------|------------|------------|------------|------------|------------|
| 4,718503 | 5,610531 | 5,526118 | 6,152741 | 5,909998 | 6,099552 | 6,369613 | 5,98669  | 6,05962722 | 5,69088751 | 6,00993671 | 5,66690224 | 5,98927817 |
| 4,331273 | 5,304439 | 5,226624 | 5,462369 | 5,309068 | 5,410218 | 5,551342 | 5,154513 | 5,4030915  | 4,70176189 | 5,77351737 | 5,0538462  | 5,50134608 |
| 8,893261 | 10,18929 | 10,40993 | 11,22306 | 11,19391 | 10,93563 | 10,97985 | 11,22958 | 10,1207132 | 9,65858737 | 9,85983051 | 10,3764127 | 10,3538929 |
| 8,169188 | 9,047876 | 8,825951 | 8,146874 | 9,042119 | 8,801177 | 9,282226 | 9,726394 | 8,0298747  | 8,50859658 | 8,04959825 | 9,42563799 | 7,80423023 |
| 10,66001 | 10,96654 | 11,48243 | 10,82092 | 10,90167 | 10,65335 | 11,1663  | 9,852462 | 10,8314773 | 9,5783689  | 11,1424768 | 10,4431619 | 10,9151215 |
| 3,913923 | 5,481551 | 4,542764 | 4,831679 | 5,360683 | 4,98462  | 5,624008 | 5,25141  | 4,76577662 | 5,22083086 | 4,62655816 | 4,34254648 | 5,26834656 |
| 6,179753 | 7,927492 | 6,984334 | 7,758657 | 7,860456 | 7,763666 | 7,778981 | 7,721411 | 6,14813851 | 6,53082757 | 7,22951107 | 6,97522498 | 6,06523104 |
| 11,57605 | 12,02608 | 12,49434 | 11,80865 | 12,00547 | 11,59914 | 12,47199 | 11,27691 | 11,660649  | 10,8439373 | 12,0059066 | 11,382424  | 11,8813302 |
| 3,001468 | 5,078115 | 4,291824 | 4,683908 | 5,245633 | 4,679051 | 5,578086 | 5,256744 | 4,92235117 | 4,99012537 | 4,37973797 | 4,01761546 | 4,98593289 |
| 4,886987 | 6,088609 | 6,843805 | 6,242549 | 7,067914 | 5,859327 | 7,153543 | 5,706516 | 6,75651901 | 5,35244486 | 7,00091443 | 6,94604784 | 6,52140664 |
| 6,973473 | 7,499184 | 7,639822 | 8,603284 | 7,941911 | 8,21727  | 8,40336  | 7,978097 | 7,36452919 | 7,56227667 | 8,31979739 | 7,72289236 | 8,23621503 |
| 9,476739 | 9,139303 | 9,227858 | 12,40942 | 12,03015 | 10,76849 | 12,49429 | 11,60359 | 11,3551331 | 11,7974748 | 11,6809102 | 11,8751222 | 9,24427604 |
| 3,733433 | 5,191438 | 4,911373 | 4,952234 | 5,130724 | 4,769757 | 5,513168 | 5,333524 | 4,7189161  | 4,80808775 | 4,44920353 | 5,08927945 | 5,03857566 |
| 7,364384 | 8,441723 | 8,664207 | 9,549486 | 9,828392 | 9,21732  | 9,917068 | 8,961484 | 9,66121591 | 9,07681191 | 9,29617006 | 9,18117726 | 8,3453242  |
| 13,76983 | 14,36518 | 14,30053 | 15,24776 | 15,1156  | 14,8055  | 15,4738  | 14,684   | 14,7367988 | 14,553924  | 14,3253391 | 13,9342655 | 13,8076929 |
| 9,323273 | 10,02192 | 9,785168 | 10,95833 | 10,95613 | 10,39214 | 11,22729 | 10,25658 | 10,6731787 | 10,5001305 | 10,4025876 | 10,0410198 | 9,60452641 |
| 3,354054 | 4,094934 | 4,915408 | 5,111172 | 4,713853 | 5,262965 | 5,185716 | 4,950642 | 4,91954051 | 4,74599381 | 4,79659823 | 4,37002884 | 5,08760831 |
| 5,255747 | 7,21889  | 6,540513 | 8,406626 | 8,64266  | 7,479875 | 8,864285 | 8,289751 | 7,66968789 | 7,71968805 | 7,20522638 | 8,87193954 | 6,82407074 |
| 6,164002 | 7,302504 | 6,945994 | 7,740996 | 7,533899 | 7,691669 | 7,778847 | 7,607915 | 7,06723902 | 7,14392183 | 7,3624506  | 6,87459873 | 7,46529416 |
| 5,750028 | 5,893588 | 6,136646 | 6,950419 | 6,487595 | 7,092565 | 6,613246 | 6,434883 | 6,32287545 | 5,73166191 | 6,57059913 | 5,86926691 | 6,46930672 |
| 4,74511  | 6,232934 | 5,928329 | 5,818664 | 6,171298 | 6,060226 | 6,386275 | 6,267094 | 5,28513019 | 5,61804677 | 5,66945898 | 5,75591719 | 5,77751228 |
| 8,994999 | 9,742336 | 9,527204 | 10,63453 | 10,71998 | 10,11952 | 10,96874 | 9,973572 | 10,4261916 | 10,2381723 | 10,1652857 | 9,79012429 | 9,32676014 |
| 4,477407 | 5,505647 | 5,682724 | 5,190767 | 6,183856 | 5,953347 | 6,229295 | 7,040689 | 4,63245139 | 5,17086805 | 4,93826797 | 6,81576141 | 4,80630785 |
| 6,521355 | 6,945375 | 7,607668 | 7,377421 | 7,117638 | 7,298299 | 7,935866 | 6,42784  | 7,1012519  | 6,53803866 | 7,25822996 | 6,44833599 | 7,08383578 |
| 4,163356 | 6,997151 | 7,176112 | 8,095502 | 7,957099 | 7,934431 | 7,861515 | 7,888026 | 7,2364709  | 6,94334354 | 7,40309297 | 7,34072201 | 7,13582846 |
| 2,589962 | 3,147931 | 3,404648 | 4,10074  | 3,925755 | 4,054547 | 4,444185 | 3,597344 | 3,86186472 | 3,15165996 | 3,75499807 | 3,42401086 | 3,9013942  |
| 5,976588 | 8,047575 | 7,350835 | 8,525345 | 8,587091 | 8,614294 | 8,954217 | 8,51876  | 7,91044993 | 8,15349749 | 7,85094449 | 8,16490703 | 8,2269895  |
| 5,842113 | 7,250542 | 7,765888 | 8,875226 | 8,643576 | 8,404887 | 8,319759 | 8,703197 | 7,56374828 | 7,07897176 | 7,39034576 | 8,12006637 | 7,68419771 |
| 5,081663 | 5,803211 | 6,18749  | 5,265499 | 5,477374 | 4,875368 | 5,982746 | 4,477027 | 5,7591167  | 5,25243453 | 6,34470811 | 5,4077552  | 5,88040245 |
| 5,035434 | 5,730717 | 6,51839  | 6,420401 | 6,105305 | 6,19262  | 6,838144 | 5,288465 | 5,88741874 | 5,29899753 | 6,16103114 | 5,45526416 | 5,84267941 |
| 6,405959 | 6,684673 | 6,892305 | 7,936619 | 7,786459 | 7,569278 | 7,279874 | 7,689274 | 6,6980568  | 6,30546197 | 6,69683475 | 7,00284415 | 7,15598114 |
| 6,9128   | 8,193316 | 8,018506 | 8,851754 | 8,853745 | 8,545791 | 8,695968 | 8,576804 | 7,5741912  | 7,55165182 | 7,6769641  | 8,29139345 | 7,675925   |
| 2,158701 | 2,851854 | 2,871431 | 3,55     | 3,722268 | 3,627769 | 4,049677 | 2,991319 | 3,66332251 | 2,58814123 | 3,58169876 | 3,2704823  | 3,59507348 |
| 2,342254 | 3,111101 | 3,937269 | 4,703211 | 4,288744 | 4,249483 | 4,768917 | 4,374816 | 4,36947597 | 4,14479049 | 3,87699384 | 4,06283771 | 4,4334904  |
| 6,025431 | 6,944373 | 6,901125 | 7,57553  | 7,597147 | 7,557424 | 8,213817 | 7,479437 | 7,02276259 | 6,89621638 | 7,13081848 | 6,98363935 | 7,13202    |
| 6,226971 | 7,577675 | 7,588875 | 7,901456 | 7,625436 | 7,677236 | 8,210205 | 6,74502  | 7,55538006 | 6,93406296 | 7,42551715 | 7,00621046 | 7,48260259 |
| 6,811068 | 7,852046 | 7,657684 | 8,426064 | 8,092921 | 8,239469 | 8,430212 | 8,422706 | 7,93604865 | 7,39392019 | 7,25562596 | 7,7205433  | 7,68166854 |
| 8,277234 | 9,255373 | 9,593453 | 9,539532 | 9,492189 | 9,41291  | 9,932791 | 8,98536  | 9,27542757 | 8,52335576 | 9,16397135 | 8,69391428 | 9,15869714 |
| 3,384727 | 5,221388 | 4,699734 | 4,588613 | 5,117165 | 4,74651  | 5,475667 | 5,255773 | 4,37514885 | 4,57218014 | 4,47813638 | 4,90069923 | 4,73626744 |
| 7,505061 | 8,717638 | 8,573218 | 9,383148 | 8,740582 | 9,036319 | 9,053003 | 8,74226  | 9,29863283 | 8,84780167 | 8,94438663 | 8,03798226 | 8,1702621  |
| 4,973392 | 5,99927  | 5,77052  | 6,014956 | 5,965837 | 6,279079 | 6,42544  | 6,824124 | 6,02203211 | 5,79560469 | 5,64340026 | 5,70494421 | 6,19653331 |
| 4,032808 | 5,606742 | 5,637515 | 6,08844  | 6,23089  | 6,202609 | 6,145165 | 5,993486 | 5,56444641 | 5,35374446 | 6,21157692 | 5,35763845 | 6,1269807  |
| 7,800323 | 8,119921 | 8,211708 | 8,886127 | 8,454023 | 8,981659 | 9,093932 | 8,613046 | 8,3722188  | 7,87488564 | 8,40434405 | 8,03230598 | 8,43590354 |
| 7,920746 | 8,74266  | 8,922729 | 9,440215 | 9,082566 | 9,668855 | 9,641838 | 8,987679 | 8,82892231 | 8,3831147  | 9,08811034 | 8,53680535 | 9,02409224 |
| 7,265884 | 10,3849  | 9,728471 | 10,08724 | 10,98809 | 9,873746 | 11,3908  | 10,77175 | 10,1197663 | 10,2933121 | 9,55857859 | 11,1787796 | 9,60562159 |
| 4,449634 | 5,807149 | 6,498626 | 6,024406 | 6,159473 | 6,107059 | 7,550483 | 5,027452 | 5,65384553 | 4,19414167 | 6,05770911 | 5,56808618 | 5,1803894  |
| 7,393035 | 8,187676 | 8,046129 | 8,437489 | 8,474122 | 8,664668 | 8,932204 | 8,144719 | 8,20072003 | 7,76141573 | 8,32568024 | 8,0097144  | 8,34380006 |



|          |           |          |          |          |          |          |          |            |            |            |            |             |
|----------|-----------|----------|----------|----------|----------|----------|----------|------------|------------|------------|------------|-------------|
| 7,258836 | 7,977329  | 8,198338 | 7,899388 | 8,283795 | 7,798843 | 8,586349 | 6,996651 | 8,26054632 | 7,27051991 | 8,09508223 | 7,49266095 | 7,91038602  |
| 2,94722  | 4,733541  | 3,550359 | 3,826639 | 4,635472 | 3,92758  | 4,893868 | 4,427111 | 4,06228569 | 4,37024919 | 3,99102962 | 4,74383228 | 4,42049817  |
| 11,11311 | 11,59988  | 12,06179 | 11,36777 | 11,43884 | 11,1045  | 11,97886 | 10,75749 | 11,2791385 | 10,579782  | 11,5016969 | 10,8109707 | 11,3857746  |
| 5,818842 | 5,382697  | 5,830629 | 5,743055 | 5,798494 | 5,654879 | 6,416606 | 4,626296 | 6,04913179 | 5,59096841 | 6,0340547  | 5,31622924 | 6,26337738  |
| 10,73039 | 11,71105  | 11,19126 | 11,59533 | 11,36788 | 11,70862 | 11,78712 | 11,44742 | 11,8053725 | 11,7948588 | 11,2146328 | 11,0641278 | 11,8830765  |
| 7,881554 | 9,551974  | 9,281466 | 9,829802 | 10,12605 | 9,73121  | 10,334   | 10,12664 | 9,34841744 | 9,17265348 | 8,78750029 | 9,64443401 | 9,42741155  |
| 6,698045 | 7,699057  | 7,409931 | 8,428957 | 8,426588 | 8,900462 | 8,781406 | 8,579417 | 7,43015117 | 7,20909812 | 7,74577265 | 7,56207929 | 8,19899592  |
| 4,064329 | 6,297283  | 6,344706 | 7,583585 | 7,723115 | 6,997908 | 7,380631 | 7,615198 | 6,71270821 | 6,30258443 | 6,39478765 | 7,38582048 | 6,42266183  |
| 1,978473 | 5,549917  | 4,991297 | 5,279441 | 5,447487 | 5,40575  | 5,525268 | 5,592187 | 4,88156571 | 5,06099624 | 4,98086357 | 3,36826994 | 5,22666037  |
| 6,077917 | 6,549654  | 6,609552 | 6,265797 | 6,671758 | 6,30551  | 6,886709 | 5,74227  | 6,38137047 | 5,53088811 | 7,04386127 | 6,17624492 | 6,56222163  |
| 4,371921 | 5,394962  | 5,440363 | 6,086781 | 5,856178 | 5,824162 | 6,387722 | 5,501278 | 5,72519007 | 4,75245922 | 5,90080315 | 5,64036732 | 5,68656661  |
| 5,45188  | 5,872373  | 6,012083 | 6,63903  | 6,474926 | 6,777436 | 6,732529 | 6,436266 | 6,38769773 | 5,84956311 | 6,30562136 | 5,92886274 | 6,44541011  |
| 6,801309 | 7,395169  | 7,367286 | 6,634551 | 6,779208 | 6,719813 | 7,277078 | 6,232141 | 7,21434565 | 6,6705203  | 7,49170565 | 6,33640837 | 3,88469789  |
| 10,67856 | 10,86816  | 11,64506 | 10,81182 | 10,70849 | 10,63303 | 11,21747 | 10,00611 | 10,7741298 | 9,77826761 | 11,2164782 | 10,0819795 | 10,77719506 |
| 2,913072 | 4,247818  | 3,301339 | 3,772079 | 3,66989  | 3,713612 | 4,158426 | 3,836172 | 3,71413558 | 3,77674105 | 3,41307882 | 2,82163636 | 3,79431785  |
| 3,440287 | 7,141259  | 6,428499 | 7,143374 | 8,09223  | 7,08921  | 8,087777 | 7,396137 | 7,20644619 | 6,8957537  | 6,3047495  | 7,75239245 | 6,78328328  |
| 5,265465 | 4,755618  | 5,699821 | 5,325211 | 5,425301 | 5,825826 | 5,972372 | 4,471759 | 5,00770774 | 4,84798426 | 5,54283734 | 4,99396837 | 5,39630825  |
| 8,462947 | 9,313745  | 9,715872 | 9,515878 | 9,768167 | 9,62931  | 9,592632 | 9,14915  | 9,5200231  | 8,6852999  | 9,52507961 | 8,72174006 | 9,72987825  |
| 7,525231 | 8,410007  | 8,727012 | 8,199284 | 8,832504 | 7,825191 | 8,632366 | 7,88452  | 7,92576042 | 7,27897474 | 9,05592539 | 7,94929119 | 8,16475392  |
| 4,3952   | 4,97946   | 5,109044 | 6,249771 | 5,774381 | 6,304882 | 6,46743  | 5,410348 | 5,34159925 | 4,92438214 | 6,04248806 | 5,16069226 | 5,48530175  |
| 5,529025 | 6,050573  | 7,357441 | 6,825121 | 6,378534 | 6,755121 | 7,851112 | 5,654739 | 6,35098107 | 4,97429747 | 6,52362638 | 5,82059459 | 6,14150847  |
| 5,064573 | 5,929627  | 6,328385 | 6,529639 | 6,183885 | 6,665537 | 6,969486 | 6,211178 | 6,15352357 | 6,02796633 | 6,22392029 | 5,87051776 | 6,28163579  |
| 3,983283 | 4,762056  | 6,934665 | 6,871731 | 6,690106 | 8,256591 | 5,920641 | 6,728738 | 6,11833506 | 5,54791507 | 5,38025001 | 6,90702585 | 5,89362056  |
| 5,402425 | 7,349973  | 6,795521 | 6,54626  | 7,126463 | 7,066932 | 7,604934 | 7,453588 | 6,67261464 | 6,66451944 | 6,48670948 | 7,06981291 | 6,98347098  |
| 5,999537 | 5,809035  | 6,401634 | 6,43084  | 6,145942 | 6,890611 | 6,966796 | 5,877342 | 6,21245829 | 5,30538567 | 6,28000659 | 5,38144086 | 6,38110755  |
| 3,620702 | 4,098146  | 4,330678 | 5,004563 | 4,742318 | 5,269333 | 4,900794 | 4,614125 | 4,53146839 | 3,81365947 | 5,24109334 | 4,22943037 | 4,63552018  |
| 5,432246 | 6,408251  | 7,76611  | 7,888613 | 7,596796 | 8,232306 | 7,75562  | 7,659539 | 6,95629029 | 7,38347687 | 7,07698672 | 6,85159579 | 7,2081826   |
| 2,596379 | 4,034608  | 3,782592 | 3,023102 | 3,50158  | 3,695049 | 4,562556 | 4,017842 | 4,02643435 | 4,16124958 | 3,51487375 | 3,75999383 | 4,01341975  |
| 4,378594 | 6,747098  | 6,966906 | 6,029166 | 7,155937 | 7,331079 | 7,045821 | 7,079151 | 7,07191251 | 6,65997271 | 6,66722617 | 7,07821146 | 6,75878308  |
| 1,19597  | 6,124081  | 5,268152 | 5,791548 | 5,981078 | 5,787795 | 6,313192 | 6,03453  | 5,25810083 | 5,61958283 | 5,39625646 | 5,82197574 | 5,72633007  |
| 3,826142 | 6,765674  | 6,510261 | 6,742205 | 7,118529 | 6,483269 | 7,32088  | 7,020065 | 7,86842228 | 7,89555631 | 6,97680982 | 7,59437983 | 7,60842705  |
| 5,84346  | 6,962882  | 7,04564  | 5,947525 | 7,497992 | 6,916093 | 7,981032 | 6,892333 | 7,11055387 | 6,29411656 | 6,71323523 | 6,61918005 | 7,45163     |
| 4,375429 | 7,006699  | 7,13625  | 8,206409 | 8,557274 | 7,576874 | 8,890996 | 8,321129 | 7,61477884 | 7,71017753 | 7,5603573  | 8,88667888 | 6,47968817  |
| 2,070642 | 3,7493    | 3,278761 | 2,839976 | 3,179816 | 2,071233 | 1,595399 | 2,873006 | 3,53530266 | 3,93096394 | 3,08787206 | 2,89073826 | 3,7906375   |
| 2,533489 | 6,10826   | 5,564104 | 5,569329 | 6,150844 | 5,176566 | 6,052287 | 6,997244 | 7,06400461 | 7,3115289  | 6,00964698 | 6,65465424 | 6,68875027  |
| 3,937106 | 5,416111  | 5,720462 | 5,738743 | 6,525485 | 6,050483 | 6,515212 | 7,212743 | 5,0840389  | 5,39235906 | 5,13232618 | 7,13352426 | 5,01216791  |
| 7,539196 | 7,864987  | 7,339013 | 7,402513 | 7,006639 | 7,250117 | 7,561382 | 7,158174 | 7,27697134 | 7,85269474 | 7,28097953 | 6,94407384 | 6,98048628  |
| 7,922924 | 8,953156  | 8,740817 | 9,034391 | 8,989264 | 8,688412 | 9,118354 | 8,804697 | 8,66145951 | 8,90956419 | 8,51272699 | 8,7640083  | 8,32122925  |
| 3,47203  | 4,719643  | 3,500076 | 3,872718 | 4,189939 | 3,17127  | 5,153944 | 4,727902 | 3,53396295 | 4,64041923 | 3,90667284 | 5,29537061 | 4,559373244 |
| 4,629644 | 4,564105  | 4,350377 | 4,474454 | 4,857525 | 4,870522 | 5,107889 | 5,109624 | 4,73219031 | 4,72884956 | 4,599509   | 4,78226142 | 5,09189223  |
| 4,246439 | 4,913972  | 5,094085 | 5,245963 | 5,084022 | 5,399625 | 5,76406  | 4,709678 | 5,1563172  | 4,55276997 | 5,48124529 | 4,80618017 | 5,45832554  |
| 2,301046 | 4,098161  | 3,728219 | 4,42662  | 3,791678 | 4,579736 | 4,194694 | 4,458581 | 3,3555866  | 4,52309615 | 4,56079935 | 3,41390728 | 3,53747867  |
| 4,189541 | 5,297929  | 4,616075 | 5,29639  | 5,002118 | 5,022127 | 5,229533 | 5,010015 | 5,08833269 | 5,07803064 | 4,58594877 | NA         | 5,33169725  |
| 2,312116 | 3,60889   | 2,782068 | 3,03499  | 3,118987 | 3,191926 | 3,357182 | 3,454459 | NA         | 2,95235333 | 2,9591929  | 3,05966881 | 3,15750838  |
| 0        | 0,7233117 | 1,095997 | 3,087036 | 2,535491 | 2,551369 | 3,402274 | 2,517295 | 1,25919719 | 0,76716657 | 2,01877166 | NA         | 2,23109727  |
| NA       | 6,610163  | 5,925629 | 6,914785 | 6,493969 | 7,019896 | 7,347345 | 6,649811 | 6,1745463  | 6,42740813 | 6,47704856 | 5,94357882 | 6,44502576  |
| NA       | 5,719484  | 5,048993 | 6,780002 | 6,621918 | 6,690586 | 6,897736 | 6,628081 | 5,23919031 | 5,80632544 | 5,21375089 | 5,25587118 | 6,1503041   |

|          |          |          |          |          |          |          |          |            |            |            |            |            |
|----------|----------|----------|----------|----------|----------|----------|----------|------------|------------|------------|------------|------------|
| NA       | 5,144446 | 5,157076 | 6,789545 | 6,381396 | 6,903238 | 7,512413 | 6,105242 | 5,26213493 | 4,95386605 | 5,89533217 | 6,10420482 | 5,80299661 |
| NA       | 4,969901 | 4,747666 | 5,925661 | 5,73772  | 6,265573 | 6,638361 | 5,394892 | 5,48058236 | 4,53472829 | 5,55260792 | 5,49753519 | 5,50752997 |
| 4,513517 | 5,669423 | 5,553355 | 6,126671 | 6,161169 | 6,102922 | 6,688664 | 6,078223 | 5,85766029 | 5,46130381 | 5,76975534 | 5,71475834 | 6,08571588 |
| NA       | 6,09101  | 5,413887 | 6,687354 | 6,541305 | 6,588766 | 7,300803 | 5,973731 | 6,20067659 | 5,53257312 | 6,13855436 | 6,05316111 | 6,1359481  |
| 4,146591 | 5,278129 | 5,253121 | 5,707687 | 5,542116 | 4,641876 | 6,137184 | 5,434797 | 5,44625541 | 4,92517717 | 5,58123498 | 5,18302604 | 5,79128272 |
| 2,541329 | 4,632529 | 3,33162  | 3,502705 | 4,258501 | 3,99948  | 4,685138 | 4,228141 | 3,77495469 | 4,27738199 | 3,50424647 | 4,21209812 | 4,34746546 |
| 6,034728 | 7,519574 | 6,801013 | 6,811636 | 7,124422 | 6,77146  | 7,513799 | 7,197479 | 6,5718304  | 6,49313646 | 6,5220039  | 6,586282   | 6,65660848 |
| 3,973004 | 5,09463  | 5,795909 | 4,828122 | 4,860196 | 5,125057 | 5,814357 | 4,116794 | 4,952389   | 4,0502327  | 5,61526796 | 4,64526193 | 4,97034505 |
| 1,866867 | 4,800109 | 3,992605 | 5,382082 | 5,106529 | 5,265052 | 6,11957  | 4,934977 | 4,55355333 | NA         | 4,7901689  | 4,70164222 | 4,37641377 |
| 6,737337 | 7,092365 | 7,015456 | 6,911682 | 7,418372 | 6,766338 | 7,571646 | 6,259555 | 7,06919841 | 6,54712281 | 7,06853286 | 6,85951875 | 7,51523503 |
| 7,205739 | 7,020549 | 7,536594 | 7,306569 | 7,842793 | 7,466541 | 7,927099 | 6,568636 | 7,26055647 | 6,15520117 | 7,299409   | NA         | 7,47028701 |
| 4,019879 | 4,445724 | 4,135828 | 4,362278 | 4,359884 | 4,438224 | 4,529722 | 4,360125 | 4,6947302  | 4,62311113 | 4,61524622 | NA         | 4,5729961  |
| 5,600291 | 6,560354 | 5,876236 | 6,23998  | 6,263347 | 6,28128  | 6,501805 | 6,24526  | 6,21811991 | 6,15188143 | 5,44809933 | 5,64108395 | 6,46803976 |
| 6,821037 | 8,467189 | 8,456004 | 9,531187 | 9,48926  | 9,143239 | 9,859091 | 8,976583 | 9,10891354 | 8,78528788 | 8,92341199 | 8,07940171 | 8,29684579 |
| NA       | 3,743832 | 4,462652 | 5,564429 | 4,98369  | 5,176154 | 5,400383 | 5,423356 | 4,10794526 | 3,5767297  | 4,62325168 | 4,91756334 | 4,42001416 |
| 4,905451 | 5,251857 | 5,156056 | 5,616713 | 5,441492 | 5,596625 | 5,512532 | 5,634488 | 3,95209728 | 3,97513069 | 3,88850992 | NA         | 3,67326321 |
| 2,812799 | 4,199445 | 4,268548 | 5,11447  | 4,937859 | 4,952923 | 5,423942 | 4,639592 | 4,721033   | 4,10530918 | 4,93829561 | 4,63036437 | 4,76859145 |
| 5,235247 | 5,715823 | 6,031102 | 6,454202 | 6,026354 | 6,600457 | 6,384896 | 6,257823 | 5,3285238  | 5,60481713 | 6,1994475  | 3,75688718 | 6,56977022 |
| 3,363115 | 4,699551 | 4,710031 | 5,152389 | 4,972459 | 5,1041   | 5,545163 | 4,598517 | 4,75132677 | 4,31971199 | 5,33951938 | 4,92360445 | 5,08242185 |
| 6,55577  | 7,570345 | 7,528654 | 7,992376 | 7,965685 | 7,906322 | 7,863171 | 8,069924 | 7,40684653 | 7,26287407 | 7,31497506 | 7,47116293 | 7,60442214 |
| 2,709397 | 4,460113 | 5,302888 | 4,807157 | 5,568297 | 4,926824 | 6,013123 | 4,788861 | 5,78358572 | 4,50924836 | 5,53613434 | 5,3593835  | 5,41082368 |
| 7,478881 | 6,94581  | 7,856531 | 7,548505 | 7,172472 | 7,747899 | 8,019864 | 6,821579 | 8,11800255 | 6,70673307 | 7,96004952 | 6,6158519  | 7,8673     |
| 3,648034 | 6,258405 | 5,283064 | 6,251548 | 6,954516 | 6,249325 | 6,993248 | 6,38695  | 7,32885504 | 6,87374713 | 6,30155712 | 7,14216479 | 6,9318731  |
| 5,938874 | 6,964875 | 6,467859 | 7,258033 | 7,15203  | 6,745574 | 7,372412 | 6,880976 | 7,01287279 | 7,02609324 | 7,03412546 | 6,73524738 | 7,15030119 |
| 5,113344 | 7,45948  | 6,531054 | 5,475163 | 6,814296 | 6,083514 | 6,694885 | 6,839174 | 6,80243358 | 6,614309   | 6,04326899 | 6,33328404 | 7,1892295  |
| 3,005085 | 3,888235 | 4,41441  | 4,903278 | 4,432308 | 4,649689 | 4,376158 | 4,824652 | 4,79837948 | 3,90207025 | 4,82310269 | 4,97959386 | 4,46057006 |
| 2,948817 | 4,519849 | 4,467772 | 5,248482 | 5,030206 | 4,69488  | 4,911288 | 4,73725  | 4,87038778 | 4,47991992 | 4,75732961 | 5,18041638 | 4,48940827 |
| 2,477667 | 4,870793 | 4,424372 | 4,74079  | 5,667909 | 4,584118 | 5,497169 | 5,345579 | 5,48093205 | 5,64083813 | 4,49334763 | 5,83898411 | 5,67608931 |
| NA       | 3,594018 | 4,046596 | 3,615491 | 4,142444 | 4,524765 | 4,665971 | 4,183359 | 4,48224347 | 4,33419095 | 3,97502406 | 3,88543415 | 4,76801823 |
| 6,54419  | 7,711707 | 7,722551 | 8,238011 | 8,161756 | 7,897018 | 7,93911  | 8,028024 | 8,02689529 | 8,37421023 | 7,76469511 | 8,25842746 | 7,71051909 |
| 4,659227 | 5,619262 | 6,296179 | 6,619906 | 6,22709  | 5,876378 | 6,126131 | 6,113941 | 6,21958899 | 7,53533144 | 6,09907982 | 6,34610151 | 5,35044346 |
| 4,190158 | 4,911775 | 4,700098 | 5,329902 | 5,609594 | 5,095358 | 5,381934 | 5,167865 | 5,53553453 | 5,10298738 | 4,97625821 | 5,02968641 | NA         |
| 6,237577 | 5,951181 | 5,778232 | 6,057803 | 5,433241 | 5,998559 | 5,809921 | 5,777114 | 6,09089506 | 6,8318677  | 6,21240599 | 5,92470442 | 5,70871795 |
| 1,960855 | 3,24752  | 3,640373 | 4,426565 | NA       | 3,968403 | 4,360085 | 4,155432 | 3,60468311 | 3,95097923 | 4,25483331 | 3,74565654 | 3,9882334  |
| 6,260774 | 6,003191 | 6,133212 | 6,147614 | 6,139372 | 6,018314 | 5,640265 | 6,181842 | 6,79692008 | 6,97560911 | 6,43218951 | 5,93347897 | 6,40974552 |
| 3,759611 | 4,356472 | 4,527242 | 4,321053 | 4,251541 | 4,622728 | 4,587275 | 4,740534 | 4,09895735 | 4,11764139 | 4,60367398 | 3,96471036 | 4,14434146 |
| NA       | 5,585012 | 5,185158 | 5,405566 | 5,934819 | 5,103942 | 5,790589 | 6,4373   | 6,53115745 | 6,53488742 | 5,66408071 | 6,26510166 | 6,11321595 |
| 2,37188  | 4,108723 | 4,148227 | 4,755294 | 4,700192 | 4,065884 | 4,696785 | 4,794909 | 4,56065028 | 4,31264426 | 4,35624045 | 5,37437041 | 4,08427442 |
| NA       | 5,856009 | 5,421185 | 5,845834 | 6,62023  | 5,524464 | 6,317302 | 6,35134  | 7,33609825 | 7,18622949 | 6,28209532 | 7,14440868 | 6,83090566 |
| 2,769066 | 3,926727 | 4,34901  | 5,20715  | 4,914205 | 4,631186 | 4,61499  | 4,877012 | 4,87726442 | 4,29693645 | 4,75112494 | 5,19561083 | 4,39873498 |
| 3,335946 | 4,304606 | 4,478768 | 4,973582 | 4,967731 | 4,567028 | 4,949721 | 4,605209 | 4,79475038 | 4,58028028 | 4,66458673 | 4,58772944 | 4,31405292 |
| 3,673518 | 5,211792 | 3,136091 | 4,290653 | 5,182376 | 5,292734 | 5,460051 | 5,496197 | 2,98940723 | 5,11768139 | 4,99674521 | 4,92919697 | 5,36677819 |
| 5,679784 | 5,169875 | 5,680989 | 5,607558 | 4,898811 | 5,499904 | 4,553448 | 5,365063 | 5,79010517 | 6,5727312  | 5,86706169 | 4,94674886 | 5,40283189 |
| 3,854236 | 4,824369 | 4,680278 | 4,851527 | 4,885438 | 5,174968 | 5,168246 | 4,784452 | 4,35128733 | 4,48043473 | 4,50670371 | 4,50779616 | 4,01939864 |
| 3,581991 | 4,85538  | 5,604802 | 6,082757 | 5,301603 | 5,040805 | 5,394773 | 5,553687 | 5,57797375 | 7,16678953 | 5,42257728 | 5,56058667 | 4,41596844 |
| 6,741615 | 7,094367 | 6,833884 | 6,733083 | 6,883298 | 6,749319 | 6,613965 | 6,830589 | 7,11499486 | 7,29248738 | 6,67130646 | 6,31579916 | 7,04175953 |
| 7,326794 | 8,375196 | 8,202476 | 8,775737 | 8,700227 | 8,362542 | 8,58978  | 8,311314 | 8,26674888 | 8,53400203 | 8,08035684 | 8,49124154 | 7,94987616 |

|           |          |          |          |          |          |          |          |            |            |            |            |            |
|-----------|----------|----------|----------|----------|----------|----------|----------|------------|------------|------------|------------|------------|
| 4,707588  | 5,737122 | 5,47881  | 6,804481 | 6,120751 | 6,714259 | 6,735498 | 6,595319 | 5,70049042 | 5,63790566 | 6,01755616 | 5,4084253  | 6,20137337 |
| 5,569344  | 6,16305  | 5,855538 | 5,952045 | 5,396655 | 5,800018 | 6,312691 | 5,710265 | 5,79833744 | 6,51495498 | 5,9068741  | 5,85113613 | 5,57590387 |
| 4,806825  | 4,773428 | 4,759884 | 4,323274 | 4,386366 | 5,517292 | 4,473596 | 4,902465 | 4,96539602 | 5,10996294 | 4,97541398 | 4,96388473 | 4,88635199 |
| 4,767528  | 6,938337 | 6,651224 | 4,848341 | 6,251755 | 5,256996 | 7,14221  | 5,012456 | 5,89180723 | 5,79433768 | 6,48707677 | 6,40552144 | 6,18071296 |
| 3,91344   | 5,467689 | 6,098942 | 5,634687 | 6,540237 | 4,880416 | 6,202971 | 5,058673 | 6,17587944 | 4,85761953 | 6,0361773  | 6,2116791  | 5,77221289 |
| 5,083808  | 5,968028 | 6,301937 | 5,749503 | 5,92425  | NA       | 6,343174 | 5,173481 | 5,88649623 | 5,01560902 | 6,67612221 | 5,84131642 | 5,99083553 |
| 5,673959  | 9,72736  | 5,212664 | 9,106008 | 9,7744   | 8,732129 | 10,01117 | 12,02283 | 8,09186945 | 4,83228204 | 5,02141769 | 9,69731584 | 5,66320716 |
| 5,785777  | 7,575544 | 7,619352 | 8,484529 | 8,599082 | 8,411063 | 9,438139 | 8,582231 | 8,31045187 | 8,14481644 | 8,2908592  | 8,41547496 | 7,61157783 |
| 3,436625  | 4,405348 | 4,068655 | 4,692505 | 4,787439 | 4,740267 | 5,208936 | 4,471187 | 4,61069177 | 4,48398162 | NA         | 4,35934917 | 4,80189865 |
| 4,565949  | 5,298358 | 5,147646 | 5,615308 | 5,576375 | 5,576118 | 5,771846 | 5,277156 | 5,57102867 | 4,74689311 | 5,76718967 | 5,02520327 | 5,49600493 |
| 6,87194   | 8,706489 | 8,031165 | 7,856226 | 8,531636 | 8,009943 | 8,91822  | 8,5091   | 7,82871028 | 8,02413451 | 7,62278467 | 8,06263625 | 8,06340213 |
| 2,335552  | 3,230762 | 3,843967 | 3,937953 | 3,902497 | 4,038687 | 4,063752 | 3,658496 | 3,56831709 | 3,32646415 | 4,56269106 | 3,91752994 | 4,08816355 |
| 3,19081   | 4,014709 | NA       | 5,184015 | 4,547954 | 4,633367 | 4,456999 | 4,485781 | 4,41191332 | 4,18711026 | 4,53494923 | 5,40574584 | 4,01005543 |
| 3,28716   | 4,402454 | 4,977101 | 5,590111 | 4,610249 | 4,240098 | 5,117189 | 5,152774 | 4,90307689 | 6,94151144 | 4,79042565 | 5,51149555 | 3,38414653 |
| 4,229795  | 6,294252 | 5,767858 | 4,994748 | 6,976078 | NA       | 6,066418 | 6,460061 | 6,12453575 | 5,82460079 | 5,26121127 | 6,62590242 | 6,37693751 |
| NA        | 2,605406 | 3,922259 | 4,09135  | 4,981048 | 3,76009  | 4,44924  | 3,203489 | 3,92785045 | NA         | 4,31040612 | 4,33645698 | 3,93770034 |
| 5,159683  | 6,539932 | 6,115712 | 5,994529 | 6,53769  | 6,098256 | 7,040251 | 6,594382 | 5,66239562 | 5,92203706 | 5,62468996 | 5,9816422  | 6,04580911 |
| 5,324445  | 7,362765 | 6,680233 | 5,444885 | 7,221505 | 6,140582 | 6,536814 | 7,676135 | 6,68353664 | 6,75523709 | 5,71914181 | 6,87162611 | 7,08461873 |
| NA        | 5,982229 | 5,691443 | 6,76224  | 6,630006 | 6,631141 | 7,004362 | 6,582971 | 5,90135765 | 5,80215016 | 5,68528178 | 6,30786409 | 5,6986791  |
| 2,129062  | 4,723103 | 4,913616 | 5,091527 | 5,109918 | 4,798235 | 4,786858 | 4,766552 | 5,19546013 | 4,95337079 | 5,03270912 | 4,86225334 | 4,57526239 |
| 3,030819  | 4,477499 | 4,569604 | 5,250703 | 5,092642 | 5,549414 | 5,554526 | 5,118495 | 4,39071152 | 5,00822477 | NA         | 4,65810173 | 4,83580848 |
| 1,223534  | 3,852971 | 3,560968 | 4,063295 | 4,578177 | 3,616399 | 4,306479 | 4,374896 | 4,13014644 | 4,16616961 | 3,47067349 | 5,01166545 | 4,03297074 |
| 5,723514  | 7,014981 | 4,620578 | 7,935991 | 5,601878 | 7,658451 | 7,910612 | 5,8873   | 4,82931451 | 6,72819597 | 6,72722605 | 7,53201799 | 4,7028549  |
| 6,919041  | 7,265749 | 6,829457 | 7,433508 | 6,996126 | 7,057611 | 7,410138 | 6,860856 | 7,18595783 | 7,54917271 | 7,22832898 | 6,60214562 | 6,64525142 |
| 3,517861  | 4,865663 | 4,461685 | NA       | 4,044384 | 4,689288 | 4,597057 | 5,045692 | 4,15799988 | 4,47820884 | 4,5618085  | 4,34992128 | 4,18752238 |
| 3,217235  | 4,667379 | 4,929461 | 5,171694 | 4,667148 | 5,265795 | 4,891964 | 4,911318 | 4,33756312 | 4,29756484 | 4,56899379 | 4,05722471 | 4,45082541 |
| NA        | 5,017261 | 3,769915 | 4,680466 | 4,835537 | 4,560723 | 5,314977 | 4,70422  | 4,39103496 | 4,88025728 | 3,16379994 | 4,91402485 | 4,63159024 |
| NA        | 3,954442 | NA       | 4,252781 | 4,360874 | 4,043754 | 4,478322 | 3,850511 | 3,66534285 | 4,34953383 | 4,04042004 | 5,08203216 | 3,79520804 |
| 2,534271  | 2,254993 | 1,942485 | 1,847653 | 1,664317 | NA       | 1,459636 | 1,260133 | 2,39353781 | 2,53558016 | 1,93372132 | 1,91708621 | 1,95905936 |
| NA        | 1,481846 | 1,994775 | 2,446798 | 2,10681  | 2,151944 | 2,913509 | 2,102322 | NA         | 2,08345814 | 2,13247849 | 1,85263683 | 2,32984872 |
| NA        | 5,748887 | 5,19208  | 5,974527 | 6,008488 | 5,884444 | 6,512601 | 5,378307 | 5,75863763 | NA         | 5,96363347 | 5,32844735 | 5,42895587 |
| 6,44706   | 7,554698 | 7,148814 | 6,374034 | 7,607299 | 7,101151 | 8,097541 | 8,144125 | 6,73971039 | 7,25110881 | 6,87063417 | 7,99469678 | 6,2051097  |
| 5,900768  | 5,986036 | 6,670905 | 8,327366 | 8,491122 | 7,157705 | 6,800058 | 7,207346 | 6,12879392 | 4,89153287 | 5,18783569 | NA         | 6,09748102 |
| 5,428912  | 6,057752 | 6,974266 | 6,550286 | 6,483339 | 6,836815 | 7,077882 | NA       | 6,53652657 | NA         | 6,83129068 | 5,88965927 | 6,23425635 |
| 4,516501  | 5,56665  | 5,776715 | 6,218246 | 5,926991 | 5,909613 | 6,039576 | NA       | 6,16314618 | 5,86257677 | 6,13901347 | 5,66166059 | 5,79014293 |
| 0,3185434 | 1,966435 | 1,918327 | 2,870355 | 3,012273 | 1,750929 | 2,378175 | 3,094139 | 2,64743625 | 0,98419213 | 2,70845289 | 3,19392556 | 2,81786242 |
| 1,513838  | 4,184585 | 3,466151 | 4,802429 | 4,453118 | 4,726999 | 5,240552 | 4,735942 | 4,26839641 | 4,02028239 | 4,16047685 | 4,26124602 | 4,45036987 |
| 3,070147  | 4,74696  | 4,687092 | 5,225383 | 4,925436 | 5,410577 | NA       | 5,262103 | 5,36328574 | 5,14466851 | 4,90070564 | 4,50645689 | 5,05186304 |
| 5,304657  | 7,509905 | 7,8438   | 7,540457 | 7,732575 | 7,401361 | 9,153876 | 6,550818 | 7,31690179 | NA         | 7,62701739 | 7,65859282 | 6,66918979 |
| NA        | 3,552325 | NA       | 2,728053 | 3,358116 | 2,541675 | 3,49937  | 3,194399 | 2,75186647 | 3,32949903 | 2,23812103 | 3,55356204 | 3,24162197 |
| 1,611557  | NA       | 3,213439 | 4,891276 | 4,370439 | 4,337949 | 3,685811 | 3,584259 | 3,0226626  | NA         | 2,80891061 | 3,20047204 | 3,07415306 |
| 4,634633  | 4,247502 | 5,455078 | 5,826916 | 4,597803 | 6,114672 | 5,497733 | 3,937629 | 4,32430578 | 3,86998621 | 5,39916891 | 4,27658845 | 4,79434626 |
| NA        | 2,555242 | 2,395593 | 3,213401 | 2,950624 | 3,384235 | 3,898147 | 3,211528 | 2,69314269 | NA         | 2,65445532 | 2,98385198 | 3,11256985 |
| 2,18396   | 2,809998 | 2,928154 | 3,743695 | 3,242015 | 3,686413 | 4,001272 | NA       | 3,63730285 | NA         | 3,26578029 | 3,15505249 | 3,29624346 |
| 4,552218  | 4,096131 | 4,523219 | 4,870192 | 4,334419 | 4,873324 | 4,451911 | 4,383068 | 4,66187515 | 5,475254   | 4,9960659  | 4,93213423 | 4,14560367 |
| 1,217195  | 2,425724 | 2,888718 | NA       | 2,889162 | 3,299259 | 3,38475  | 3,208327 | 2,98573594 | NA         | 4,07152452 | 4,27086284 | 2,87293091 |
| 2,594729  | 6,040946 | 5,673974 | 4,634252 | 7,592078 | 4,875523 | 7,356874 | 6,478515 | 5,53412639 | 6,9341002  | 5,66511036 | 7,20043625 | 6,74856676 |

|          |          |          |          |          |          |          |          |
|----------|----------|----------|----------|----------|----------|----------|----------|
| 3,615734 | 4,485111 | 4,747249 | 4,782445 | 4,512691 | 4,635851 | 4,639427 | 4,796246 |
| 3,132105 | 3,802682 | 4,744423 | 4,508739 | 4,702564 | 4,636927 | 5,119259 | 3,769304 |
| 3,403564 | 4,498658 | 4,74753  | 6,49276  | 5,967452 | 5,80259  | 5,606554 | 5,560492 |
| 1,145373 | 4,053725 | 4,546165 | 5,390507 | 5,112382 | 5,472276 | 5,492669 | 4,818202 |
| 3,771124 | 3,889026 | 3,848739 | 4,270802 | 4,195123 | 4,722389 | 5,289334 | 3,32459  |
| 4,345079 | 3,239885 | 4,85328  | 5,633268 | 5,234672 | 5,216194 | 6,054243 | 4,034431 |
| 2,31959  | 6,687854 | 5,949212 | 8,130434 | 8,195813 | 7,290042 | 8,531333 | 8,133134 |

|            |            |            |            |            |
|------------|------------|------------|------------|------------|
| 3,98940644 | 4,21425005 | 4,42536013 | 4,21499815 | 4,38837251 |
| 4,43319387 | 3,84084396 | 4,85926896 | 4,29618321 | 4,81157307 |
| 4,79865323 | NA         | 4,50900015 | 5,46912772 | 4,84788396 |
| 4,84204309 | 4,44072813 | 5,67074003 | 4,91127187 | 4,85414377 |
| 3,79723369 | 2,88256887 | 4,54423573 | 3,61212666 | 4,50592521 |
| 4,65602509 | 4,27217336 | 5,92478385 | 4,60486624 | 4,27087105 |
| 7,02651919 | 7,87414834 | 7,74909072 | 8,01496257 | 6,62132065 |

NORM DATA

| SAL-INTACT6                  | SAL-LESION1                  | SAL-LESION2                  | SAL-LESION3                  | SAL-LESION4                  | SAL-LESION5                  | SAL-LESION6                  | LDOPA-INTACT1                | LDOPA-INTACT2                | LDOPA-INTACT3                | LDOPA-INTACT4                | LDOPA-INTACT5                | LDOPA-INTACT6                | LDOPA-LESION1                |
|------------------------------|------------------------------|------------------------------|------------------------------|------------------------------|------------------------------|------------------------------|------------------------------|------------------------------|------------------------------|------------------------------|------------------------------|------------------------------|------------------------------|
| Int (log <sub>2</sub> )<br>6 | Int (log <sub>2</sub> )<br>5 | Int (log <sub>2</sub> )<br>1 | Int (log <sub>2</sub> )<br>7 | Int (log <sub>2</sub> )<br>4 | Int (log <sub>2</sub> )<br>2 | Int (log <sub>2</sub> )<br>3 | Int (log <sub>2</sub> )<br>1 | Int (log <sub>2</sub> )<br>5 | Int (log <sub>2</sub> )<br>7 | Int (log <sub>2</sub> )<br>4 | Int (log <sub>2</sub> )<br>6 | Int (log <sub>2</sub> )<br>2 | Int (log <sub>2</sub> )<br>5 |
| 10,3893911                   | 10,9960885                   | 10,434849                    | 10,0414082                   | 11,5474243                   | 10,7329345                   | 10,9402721                   | 10,5855876                   | 10,2306424                   | 11,0086355                   | 10,548147                    | 10,2941517                   | 10,5142245                   | 10,5164547                   |
| 4,60955026                   | 4,02157657                   | 4,25990798                   | 4,02530602                   | 4,7042809                    | 4,53578703                   | 4,75157344                   | 4,33376599                   | 4,13228131                   | 4,45829514                   | 4,83913807                   | 4,67398229                   | 4,66696247                   | 4,32971677                   |
| 6,09634439                   | 6,55382078                   | 6,13068889                   | 5,02035532                   | 6,56239376                   | 6,15223807                   | 6,57414619                   | 5,8220616                    | 5,86102108                   | 6,3351153                    | 5,99263599                   | 5,13797482                   | 5,46984428                   | 5,87001022                   |
| 6,0226356                    | 5,94015738                   | 6,03587872                   | 5,6443396                    | 6,54734004                   | 6,12898657                   | 6,15428332                   | 4,8520783                    | 5,35813648                   | 6,36451536                   | 6,5707584                    | 6,26172151                   | 6,68916793                   | 6,12159018                   |
| 3,71422845                   | 3,82765199                   | 2,87828657                   | 2,81333669                   | 3,66750948                   | 5,15931504                   | 5,39635805                   | 5,04953161                   | 3,70511864                   | 3,93577608                   | 4,90811866                   | 4,0067076                    | 4,53106234                   | 4,84764299                   |
| 3,92346177                   | 3,4238402                    | 3,49024211                   | 3,11446876                   | 4,09255458                   | 3,87460364                   | 4,13088206                   | 3,52605828                   | 3,36730237                   | 3,52834397                   | 4,1619482                    | 3,84980018                   | 3,83610186                   | 3,56901347                   |
| 6,75434684                   | 6,89283713                   | 6,65932599                   | 6,49038047                   | 7,16592013                   | 6,97625305                   | 7,09446728                   | 6,73384941                   | 6,59589589                   | 7,18340485                   | 7,0459266                    | 7,06262447                   | 7,00771612                   | 6,80084896                   |
| 3,97156789                   | 4,96944056                   | 4,20832887                   | 3,75027966                   | 5,24863325                   | 4,2652649                    | 4,62929773                   | 4,31462614                   | 3,89355202                   | 4,25433379                   | 3,94218573                   | 3,4369245                    | 3,89869951                   | 4,0429152                    |
| 9,72342476                   | 9,71677272                   | 9,65681899                   | 9,12810464                   | 10,5058683                   | 9,94057988                   | 9,73265174                   | 8,58934703                   | 9,33890505                   | 9,95583563                   | 10,2739531                   | 10,1303645                   | 10,3108355                   | 9,91776176                   |
| 9,11056678                   | 9,27303192                   | 9,25736296                   | 8,59858257                   | 8,95865621                   | 8,30528572                   | 8,99669902                   | 8,71725928                   | 9,2528037                    | 9,71072643                   | 9,44579726                   | 9,00625506                   | 8,64572388                   | 9,03994748                   |
| 5,04099496                   | 5,23868182                   | 5,31299536                   | 4,61531611                   | 5,24354334                   | 5,23213349                   | 5,09352642                   | 5,42643211                   | 4,94493177                   | 4,7675275                    | 5,27970011                   | 5,24390219                   | 5,89413496                   | 5,11853161                   |
| 9,57299176                   | 9,97337238                   | 10,275977                    | 8,94168049                   | 10,3088296                   | 9,79597022                   | 9,84137047                   | 9,52897486                   | 9,27538543                   | 9,85984025                   | 9,4703838                    | 8,4240054                    | 9,53666846                   | 9,88899908                   |
| 6,26098257                   | 6,49452291                   | 4,66269451                   | 5,53950129                   | 6,04266908                   | 5,19225801                   | 4,6783001                    | 4,9784176                    | 5,67212425                   | 6,40114254                   | 5,37995976                   | 6,8553901                    | 5,70775881                   | 6,11329662                   |
| 11,8423135                   | 12,2161551                   | 12,0083298                   | 11,4377601                   | 12,3220501                   | 11,7898284                   | 11,7302343                   | 11,8235516                   | 11,8725566                   | 12,3040666                   | 12,2603382                   | 12,0814309                   | 12,2740623                   | 11,9468706                   |
| 4,59603289                   | 4,46114877                   | 4,52818008                   | 4,15993333                   | 4,98553222                   | 4,67224889                   | 4,61304523                   | 3,20494764                   | 3,93791216                   | 4,7065842                    | 5,10777745                   | 4,7807128                    | 5,30414934                   | 4,51871234                   |
| 7,91703545                   | 8,46785182                   | 7,00541627                   | 7,17692284                   | 7,6264804                    | 6,73811255                   | 7,26692342                   | 6,90347549                   | 8,01554135                   | 8,25581654                   | 7,84647989                   | 8,02952993                   | 7,06274755                   | 7,8487121                    |
| 5,19122116                   | 5,38295597                   | 4,88554493                   | 4,62973216                   | 5,4754721                    | 4,65107621                   | 5,29190525                   | 4,79507966                   | 4,47843873                   | 5,16617555                   | 5,2458928                    | 5,29292467                   | 4,73648464                   | 4,9203178                    |
| 4,76408821                   | 4,96369106                   | 5,39947265                   | 4,78037679                   | 5,48195236                   | 4,96051862                   | 5,33070136                   | 4,52140735                   | 4,07880851                   | 4,66976288                   | 4,64648759                   | 3,15801779                   | 4,49114472                   | 4,33182309                   |
| 3,6980628                    | 4,58559515                   | 3,55544764                   | 3,22885679                   | 4,3840616                    | 3,32991348                   | 4,24012363                   | 3,50103931                   | 3,26926042                   | 4,96235191                   | 3,62264852                   | 4,52497403                   | 2,80666791                   | 3,76289215                   |
| 7,02432637                   | 7,27853223                   | 6,72896776                   | 6,12696147                   | 7,57142268                   | 6,35273814                   | 7,03538911                   | 6,76329075                   | 6,45013789                   | 6,80763839                   | 7,2047109                    | 6,95848258                   | 7,01036412                   | 6,06943054                   |
| 5,75464022                   | 5,0126063                    | 6,04071989                   | 5,5277142                    | 6,07024546                   | 5,85414869                   | 6,19252539                   | 5,61221319                   | 4,90411927                   | 4,6963025                    | 5,90726842                   | 3,90981706                   | 5,91351409                   | 5,14587319                   |
| 6,10510272                   | 5,96784845                   | 6,60260888                   | 5,12810111                   | 5,51475597                   | 4,9210473                    | 5,97968477                   | 5,71108671                   | 6,45664797                   | 6,60322468                   | 6,45527033                   | 5,56857287                   | 5,69103141                   | 5,84708758                   |
| 12,1859872                   | 12,7397352                   | 12,5705981                   | 12,0045204                   | 12,8920325                   | 12,6484302                   | 12,4925985                   | 12,4491448                   | 12,4435517                   | 12,9492479                   | 12,7836022                   | 12,3457661                   | 12,8897509                   | 12,5915764                   |
| 9,30417011                   | 9,28607998                   | 9,443741                     | 8,75781543                   | 8,8873167                    | 8,34537637                   | 9,06270459                   | 8,84538564                   | 9,2449887                    | 9,91418953                   | 9,61865237                   | 9,08462978                   | 8,64784768                   | 9,13269722                   |
| 6,4189905                    | 6,60632489                   | 5,70471405                   | 6,30046238                   | 7,04384276                   | 5,99824005                   | 5,91475418                   | 6,0181332                    | 5,88405081                   | 6,62180174                   | 6,43622429                   | 6,65975029                   | 6,59087788                   | 6,3774721                    |
| 4,71300221                   | 4,3025388                    | 3,40916077                   | 4,31416657                   | 4,59522357                   | 5,36607682                   | 5,34486249                   | 5,16165945                   | 4,29483339                   | 4,51160582                   | 5,12220703                   | 5,26849463                   | 5,12183145                   | 5,38461355                   |
| 11,9133895                   | 12,4189377                   | 12,2684918                   | 11,7291328                   | 12,6269939                   | 12,0477065                   | 11,9946991                   | 12,0239541                   | 11,8687036                   | 12,5896609                   | 12,4700362                   | 12,2206768                   | 12,4417094                   | 12,132138                    |
| 4,46980874                   | 4,55662007                   | 2,89947109                   | 3,99868372                   | 4,30671136                   | 4,98158278                   | 4,8334193                    | 4,80725974                   | 4,19784465                   | 4,51789764                   | 4,92313126                   | 5,03745949                   | 4,91536451                   | 5,21870549                   |
| 4,8344992                    | 4,62968995                   | 4,66487564                   | 4,26391125                   | 5,15889381                   | 4,63092236                   | 4,61072885                   | 4,7271875                    | 3,92134981                   | 4,41336016                   | 4,5130485                    | 4,23775862                   | 4,57768903                   | 4,37598941                   |
| 6,03366413                   | 5,99609771                   | 6,34048379                   | 5,94560863                   | 6,27253345                   | 5,83127703                   | 5,9279415                    | 5,45011786                   | 6,29699289                   | 5,59299858                   | 5,31421283                   | 7,18725388                   | 5,43601172                   | 5,73388806                   |
| 4,95530291                   | 4,73655723                   | 5,09753899                   | 4,23541467                   | 4,59969226                   | 4,22248357                   | 4,69946428                   | 4,56844579                   | 4,99499959                   | 5,1625003                    | 5,25128941                   | 4,29954333                   | 4,32563818                   | 4,83991216                   |
| 6,05737466                   | 6,24955337                   | 6,48714999                   | 6,14849592                   | 6,6112852                    | 6,01570511                   | 6,49464698                   | 5,73792752                   | 5,32968804                   | 5,43783202                   | 5,81924272                   | 4,92028266                   | 5,5346217                    | 5,88178699                   |
| 6,62458256                   | 6,74239203                   | 6,15329494                   | 6,13352099                   | 6,80074133                   | 6,08072285                   | 6,4834215                    | 6,17319829                   | 5,85856844                   | 6,90261047                   | 6,35611972                   | 6,61862609                   | 5,99645717                   | 6,44563863                   |
| 6,11706138                   | 6,07538631                   | 6,34073889                   | 5,4663998                    | 5,48784403                   | 5,21887566                   | 5,85518154                   | 5,79271176                   | 6,48299453                   | 6,47025688                   | 6,41907584                   | 5,41989823                   | 5,32933092                   | 5,9618187                    |
| 5,86326208                   | 5,58549498                   | 5,55585249                   | 5,52109033                   | 6,06059181                   | 5,6890727                    | 5,48720471                   | 5,48339139                   | 6,05394081                   | 5,98297542                   | 6,19158096                   | 6,58400744                   | 5,90400221                   | 5,99010339                   |
| 5,95434997                   | 5,92309713                   | 5,18920453                   | 5,42043905                   | 6,22852645                   | 5,8454433                    | 6,30204587                   | 6,21122819                   | 5,55440939                   | 5,85840245                   | 6,45364742                   | 5,69770524                   | 6,08525026                   | 5,65576373                   |
| 5,03826835                   | 5,09968796                   | 3,98695024                   | 4,75387766                   | 4,76850642                   | 5,36571663                   | 5,26367469                   | 5,23917141                   | 4,97125288                   | 5,02467904                   | 5,22390459                   | 6,08911637                   | 5,29415151                   | 5,55408218                   |
| 6,28997415                   | 6,45506312                   | 6,15990378                   | 6,17459703                   | 6,33603116                   | 6,3980352                    | 6,01332905                   | 6,19344168                   | 6,35440227                   | 5,73564941                   | 6,22548544                   | 6,66268224                   | 6,66560089                   | 6,3096841                    |
| 6,55741199                   | 6,98276778                   | 5,85279609                   | 6,06712518                   | 7,08749353                   | 6,33706656                   | 6,7912811                    | 7,01768871                   | 6,36099959                   | 6,75752287                   | 7,1351912                    | 6,87494561                   | 6,72756802                   | 6,61805813                   |
| 7,49376057                   | 7,72419671                   | 7,22555165                   | 7,20569151                   | 7,51285838                   | 7,40598521                   | 7,10016275                   | 7,16203413                   | 7,29468902                   | 7,06491138                   | 7,48403699                   | 7,70203055                   | 7,7801241                    | 7,424149                     |
| 11,327764                    | 11,8342568                   | 12,0211036                   | 11,1272768                   | 11,5608092                   | 11,8683407                   | 11,5587463                   | 11,7083484                   | 11,824985                    | 11,5158061                   | 11,8829023                   | 10,9243488                   | 11,8843998                   | 11,4514673                   |

|            |            |            |            |            |            |            |            |            |            |            |            |            |            |
|------------|------------|------------|------------|------------|------------|------------|------------|------------|------------|------------|------------|------------|------------|
| 5,81004253 | 5,12576347 | 6,85481549 | 5,9568157  | 6,02278949 | 6,42645286 | 6,6870259  | 6,01795569 | 5,38061188 | 5,09540769 | 6,12158009 | 3,77765035 | 5,88478724 | 4,90213275 |
| 9,6988005  | 9,99784452 | 9,75992032 | 9,68158145 | 9,83331648 | 9,76134511 | 9,43095466 | 9,78095803 | 9,11146572 | 8,95660562 | 9,58439191 | 9,42281554 | 10,1471525 | 9,69401336 |
| 7,72211755 | 7,57809066 | 7,04125043 | 6,75111856 | 7,84574246 | 7,50407691 | 8,14450925 | 8,00342073 | 8,03506796 | 8,04092412 | 7,82985092 | 7,56781888 | 8,00646544 | 8,63777009 |
| 7,12536614 | 7,17766264 | 6,43348836 | 6,30729859 | 7,80529293 | 7,44940553 | 7,99564619 | 7,77367665 | 7,34633711 | 7,59103588 | 7,52473209 | 7,46243519 | 7,51199969 | 8,35301497 |
| 4,22252944 | 4,53468037 | 4,43765157 | 3,67912966 | 4,22786709 | 4,24858104 | 4,09434277 | 4,58032665 | 4,13041479 | 3,91510365 | 4,44410808 | 4,43598618 | 4,73484212 | 4,50463217 |
| 6,17030827 | 6,16455741 | 6,15551685 | 5,63038959 | 5,55261494 | 5,13784766 | 5,95637061 | 5,67886547 | 6,6583614  | 6,35832396 | 6,34788559 | 5,58451948 | 5,49473205 | 6,21032898 |
| 6,82524612 | 6,6967566  | 6,47363359 | 5,77943938 | 5,56310299 | 5,38750491 | 6,06923803 | 5,81379423 | 6,49306498 | 6,79442357 | 6,5847881  | 6,15422579 | 5,96909489 | 6,52448411 |
| 5,47205795 | 5,2094136  | 5,43101187 | 5,03735712 | 4,71673636 | 4,49340051 | 5,46170369 | 5,11907816 | 6,13364113 | 5,79067386 | 5,65040891 | 5,02301241 | 4,91338528 | 5,1130434  |
| 5,02712685 | 4,28366819 | 5,32119833 | 4,76465729 | 4,98138136 | 4,45088768 | 4,98754481 | 4,9675323  | 4,24957543 | 4,72157401 | 5,17492304 | 4,28891697 | 4,95468333 | 4,36579399 |
| 4,93058117 | 5,21490086 | 5,10701365 | 4,06077301 | 4,49110254 | 4,74650998 | 4,55471587 | 4,90371755 | 5,11212924 | 4,64990526 | 5,16915644 | 5,03480202 | 5,19801977 | 4,88692988 |
| 3,41007923 | 3,90042779 | 3,60928186 | 3,36725564 | 3,55075631 | 4,04171447 | 3,58356234 | 4,09178327 | 3,615705   | 3,82957073 | 4,13568737 | 3,14163695 | 4,41309749 | 3,72324792 |
| 6,31112842 | 6,23583661 | 6,33636334 | 5,79726572 | 5,43235231 | 5,81049635 | 5,98869502 | 5,94992353 | 6,81404991 | 6,40482735 | 6,50502456 | 5,50123668 | 5,62476537 | 6,08217251 |
| 6,49261275 | 6,74559504 | 6,20090249 | 5,62236576 | 7,00945388 | 5,92862309 | 6,46911949 | 6,4207966  | 6,09395545 | 6,42795185 | 6,76629872 | 6,5614326  | 6,59091518 | 5,60632103 |
| 3,78203672 | 3,64433199 | 3,3784352  | 3,35533434 | 4,07779372 | 3,81452939 | 3,78147032 | 3,43765828 | 3,36681166 | 4,48978004 | 3,67021364 | 4,40788457 | 2,83498996 | 3,79614008 |
| 10,2810098 | 10,5399871 | 10,2588788 | 9,68361291 | 10,3279564 | 10,212061  | 9,9351698  | 10,1331013 | 10,4621665 | 10,1521242 | 10,3981518 | 10,2530098 | 10,5110253 | 10,2252084 |
| 4,62759894 | 4,80398064 | 4,22795055 | 4,15835136 | 4,70236438 | 4,73675957 | 4,37832471 | 4,44099747 | 4,13858783 | 4,53474945 | 4,42797617 | 4,60597268 | 4,63516324 | 4,75176832 |
| 5,58986267 | 6,27304306 | 6,14038736 | 5,55926349 | 6,72390767 | 5,22292944 | 5,70999254 | 5,40889815 | 4,92949078 | 5,89741572 | 5,31702232 | 5,57675005 | 5,10724558 | 4,98633289 |
| 5,44524639 | 6,63935431 | 6,63162368 | 6,29016166 | 6,80860905 | 5,63633045 | 6,92957201 | 7,00436118 | 6,61824226 | 6,86474099 | 7,20244892 | 6,98254635 | 7,23160068 | 6,43298324 |
| 8,66865381 | 9,00535377 | 8,80951986 | 8,47014526 | 8,69377404 | 8,80576593 | 8,46510802 | 8,69839119 | 8,25250863 | 8,21481789 | 8,6482263  | 7,79402449 | 9,04750895 | 8,56240229 |
| 8,29601126 | 8,20393486 | 8,02718823 | 7,79338058 | 7,771653   | 7,76334798 | 7,93772432 | 7,79600815 | 8,24470817 | 8,47743974 | 8,28918525 | 7,67574354 | 8,00941377 | 7,85775259 |
| 8,17166194 | 8,48044003 | 4,65208565 | 7,63462572 | 8,37973831 | 8,38134308 | 4,0207631  | 4,23826165 | 8,43810589 | 8,74314103 | 8,53791435 | 8,62346152 | 5,52160372 | 8,31169083 |
| 8,13059145 | 8,59977096 | 8,61648841 | 8,1535952  | 8,81732145 | 8,18149509 | 8,69109529 | 8,64687638 | 8,8458101  | 8,77519496 | 8,79731894 | 8,64433562 | 8,91413183 | 8,51513314 |
| 7,57314944 | 7,68475751 | 7,47879288 | 7,0785935  | 8,01676792 | 7,38891683 | 7,55753778 | 7,1855625  | 7,3229657  | 7,54893169 | 7,35055305 | 7,41853525 | 7,33998184 | 7,4620719  |
| 5,48549152 | 5,34251373 | 4,69087383 | 5,35326833 | 5,5137545  | 5,28278289 | 4,85968519 | 5,12893678 | 4,7537904  | 5,20313937 | 5,17105217 | 5,39053628 | 5,32648146 | 5,16356367 |
| 4,65462641 | 5,13792649 | 5,05351229 | 4,57151276 | 5,38623771 | 5,04816572 | 5,23355131 | 5,31006855 | 4,55433333 | 4,44424161 | 4,53246453 | 4,15562143 | 4,89850653 | 4,71664525 |
| 8,57037086 | 8,55498311 | 8,43087282 | 8,14131265 | 9,038983   | 8,41791416 | 8,93082392 | 8,23738772 | 7,74218251 | 8,87207495 | 9,14546492 | 8,37957238 | 8,80402421 | 8,11600331 |
| 9,56185027 | 9,57255476 | 8,87175809 | 9,42614539 | 9,93347389 | 9,34131378 | 9,02396238 | 9,05463105 | 8,80194067 | 9,57389402 | 9,49555616 | 9,7201507  | 9,59038288 | 9,33614228 |
| 5,86884285 | 5,13284288 | 5,60831164 | 4,91944114 | 4,28712368 | 4,41537285 | 4,86295649 | 5,58508506 | 6,53447087 | 5,23638873 | 5,40627759 | 4,34057927 | 4,34070255 | 5,15503709 |
| 6,74788787 | 6,02657783 | 6,14259979 | 6,36717165 | 5,2518729  | 5,50772262 | 5,98665188 | 5,77455008 | 6,53382386 | 6,14386285 | 6,29290853 | 5,64856185 | 5,54886247 | 5,84658379 |
| 4,48505519 | 4,94521567 | 4,86022764 | 4,44583125 | 5,63919347 | 4,17659243 | 4,80813196 | 4,56796265 | 4,1827526  | 5,02677153 | 4,56744628 | 4,60121994 | 4,4202757  | 4,25839675 |
| 8,36424951 | 8,10148811 | 7,60269182 | 7,88320076 | 8,3100119  | 8,7266156  | 8,73404198 | 8,84774004 | 8,67575562 | 7,58152978 | 8,4001475  | 8,14935805 | 8,77806475 | 9,01901142 |
| 4,34450287 | 4,53269301 | 4,83669792 | 3,82337839 | 3,49533948 | 5,01188747 | 4,40064236 | 4,85238026 | 4,9694309  | 3,56252099 | 4,59303814 | 4,19060723 | 5,16409487 | 4,36538507 |
| 6,62383828 | 6,26980727 | 5,51220038 | 5,99091122 | 6,22030826 | 6,7267511  | 6,71225651 | 6,8433273  | 6,97826677 | 5,76948883 | 6,46873944 | 6,33500017 | 6,68968745 | 7,29106704 |
| 7,65325526 | 7,70666068 | 8,64216986 | 6,86764469 | 7,43009368 | 8,65316377 | 7,63532004 | 8,94374583 | 9,3719189  | 6,64703786 | 8,54929432 | 7,27973942 | 8,34183058 | 8,14177828 |
| 8,31901029 | 8,37180641 | 8,28284578 | 7,72807403 | 7,5206224  | 7,49536403 | 7,90732014 | 7,76991676 | 8,39299787 | 8,5525083  | 8,33917586 | 7,45381936 | 7,59892268 | 8,01354813 |
| 4,32313088 | 4,44235496 | 4,53891411 | 3,73242574 | 3,27526222 | 4,82782801 | 4,3177461  | 4,66230216 | 4,73538789 | 3,15741185 | 4,2819621  | 3,8105859  | 5,05906685 | 4,07338724 |
| 7,45802852 | 7,39382193 | 6,87086296 | 6,89197079 | 7,94962921 | 8,22379555 | 8,48589306 | 8,34290441 | 8,01366302 | 8,4041519  | 8,01177731 | 7,76437835 | 8,07229403 | 8,85499968 |
| 8,44083433 | 8,06557879 | 8,080462   | 8,09622056 | 8,70734619 | 8,54485107 | 8,70465133 | 8,39573047 | 8,15788438 | 8,41787167 | 8,75538494 | 8,12814681 | 8,34791471 | 8,30017287 |
| 5,80759741 | 5,57076674 | 5,58057803 | 5,35509941 | 6,50937738 | 5,80784778 | 6,00266234 | 5,01661586 | 5,27232955 | 6,58859255 | 6,40730158 | 6,25649835 | 6,25638763 | 5,45658011 |
| 3,12439866 | 3,79113671 | 2,83765012 | 2,62741811 | 3,31582314 | 3,08722335 | 2,96670953 | 2,85852706 | 1,88941514 | 2,33944714 | 2,55591684 | 1,73640259 | 2,67428787 | 2,48512744 |
| 9,68002484 | 9,83921113 | 9,83555831 | 9,25818459 | 8,93604299 | 9,64573784 | 9,70750244 | 9,49281256 | 10,0216547 | 9,56655692 | 9,87677508 | 8,57847953 | 9,55954622 | 9,55747767 |
| 6,94465055 | 6,5050198  | 6,75021297 | 6,1873254  | 6,73347971 | 7,40714998 | 7,3755268  | 7,59330161 | 7,36766752 | 6,63066614 | 7,05995816 | 5,95125608 | 7,16989191 | 7,44802948 |
| 10,1512018 | 10,156609  | 10,0889778 | 9,60513034 | 9,96658572 | 9,94549158 | 10,0019478 | 9,91566078 | 10,3500212 | 10,5421288 | 10,3782508 | 9,84671298 | 9,93670282 | 9,98199196 |
| 6,43047909 | 6,28008219 | 6,28074059 | 5,84417602 | 6,82951026 | 5,77310666 | 6,42492668 | 5,86513427 | 5,64868197 | 6,27083722 | 6,72701631 | 6,05988152 | 6,18731876 | 5,41658682 |
| 11,8708368 | 12,0905165 | 10,4983201 | 11,2023491 | 11,96228   | 12,1786101 | 12,291527  | 12,0662289 | 11,4889671 | 12,2229109 | 12,3278239 | 12,4518973 | 12,2834641 | 12,4602425 |
| 7,60325699 | 7,62445847 | 7,63663313 | 6,82645007 | 7,37056824 | 7,45907081 | 7,74188595 | 7,26989057 | 7,6006646  | 7,60835152 | 6,92348628 | 7,53426552 | 7,39398913 | 7,38975812 |
| 5,88268181 | 6,00990063 | 4,7332552  | 5,36409117 | 5,52136586 | 6,05983832 | 5,99234545 | 5,97426811 | 5,86544746 | 5,55041143 | 5,96558099 | 6,9173425  | 6,21458404 | 6,48129772 |

|            |            |            |            |            |            |            |            |            |            |            |            |            |            |
|------------|------------|------------|------------|------------|------------|------------|------------|------------|------------|------------|------------|------------|------------|
| 5,90305535 | 6,16491892 | 6,2573977  | 5,83542877 | 6,53457636 | 5,97271701 | 5,99443493 | 5,67139785 | 5,35700421 | 6,07193207 | 5,70046679 | 5,73342624 | 5,71075378 | 5,60551331 |
| 5,37856776 | 4,81318134 | 4,73686924 | 4,880312   | 5,31267731 | 5,5767848  | 5,5042826  | 5,40395603 | 4,74877244 | 5,24283739 | 5,76337339 | 5,39166158 | 5,42525559 | 5,3296808  |
| 10,3386395 | 10,3811945 | 10,5171727 | 9,7528298  | 9,92771376 | 9,911512   | 10,2153576 | 10,0235987 | 10,5120916 | 10,7092602 | 10,6273023 | 9,41801867 | 9,98145474 | 10,1034804 |
| 8,22992204 | 8,13994205 | 8,70487087 | 7,68817827 | 8,24510849 | 9,0194097  | 7,99957553 | 9,37076479 | 9,63590247 | 7,73810217 | 8,937629   | 8,77896034 | 8,91683486 | 8,64464347 |
| 10,2709615 | 10,5319327 | 9,10078966 | 9,79617079 | 10,3871996 | 10,9351935 | 10,8299271 | 10,8988966 | 10,0966969 | 10,7231368 | 10,7612646 | 10,9773306 | 10,7064115 | 11,0912477 |
| 4,75934009 | 4,99150482 | 5,15847328 | 4,09927617 | 4,98831675 | 5,28437709 | 4,89315456 | 5,18662077 | 4,86314866 | 4,89076445 | 5,26056437 | 5,02331337 | 5,59045153 | 4,69984906 |
| 6,51734997 | 7,43214101 | 7,5831166  | 7,10114    | 7,51286414 | 7,02174002 | 7,7711707  | 7,41003779 | 7,26759912 | 7,46180358 | 7,89060299 | 7,02310835 | 7,87183008 | 6,94852316 |
| 11,1294672 | 11,5220381 | 10,2074325 | 10,4708746 | 11,4222264 | 11,8786412 | 11,8693024 | 11,6448905 | 11,2089265 | 11,6290473 | 11,8053353 | 11,7858168 | 11,6946659 | 12,0232119 |
| 4,66357423 | 4,88442775 | 4,91818705 | 3,97041602 | 2,50065374 | 5,09273023 | 4,75803663 | 4,9587397  | 5,16921784 | 3,41874741 | 4,9602582  | 4,21799129 | 5,21415863 | 4,46873454 |
| 6,16362519 | 6,43527936 | 5,19130316 | 4,85189079 | 5,80965339 | 6,89368044 | 6,9665585  | 6,51152353 | 6,32909802 | 6,23483453 | 6,69744332 | 5,88212824 | 6,15666678 | 6,81909664 |
| 8,06144584 | 7,71143055 | 7,97565463 | 7,69086145 | 8,74369864 | 7,94468964 | 8,1092019  | 7,54373583 | 7,46817938 | 7,75991647 | 7,25429508 | 7,72363631 | 7,47233856 | 7,55222443 |
| 11,2777411 | 9,32922231 | 12,6395599 | 11,2217353 | 7,42984595 | 12,3793909 | 11,7381762 | 12,270932  | 11,116664  | 8,8780024  | 9,66386675 | 9,93298951 | 9,00211066 | 9,01479787 |
| 4,74165946 | 5,10474534 | 4,79437251 | 4,16445771 | 4,6111933  | 4,89159959 | 4,70616666 | 5,07180729 | 5,23896403 | 4,27630493 | 5,10374681 | 4,86401501 | 5,31985728 | 5,03933616 |
| 9,05255538 | 8,71114306 | 9,46357985 | 8,61832639 | 6,39677219 | 9,72933021 | 9,52807257 | 9,04088169 | 8,55824249 | 7,68356928 | 9,09169968 | 8,06864977 | 8,35146371 | 8,49567803 |
| 14,0784385 | 13,8504593 | 14,6643935 | 14,1943203 | 12,4665381 | 14,9277374 | 14,7418254 | 14,3987889 | 13,6608294 | 13,301471  | 14,28859   | 13,7220213 | 13,8763916 | 13,6867041 |
| 10,0764909 | 9,56205787 | 10,7482972 | 10,167598  | 7,88282464 | 10,9138159 | 10,7441264 | 10,4617006 | 9,03430164 | 9,00737433 | 10,248876  | 9,79754222 | 9,82534536 | 9,52807767 |
| 4,75303781 | 5,02856985 | 4,40414743 | 4,85177773 | 5,13989087 | 5,13230633 | 4,59528093 | 4,383297   | 4,17081564 | 4,53714893 | 4,44695494 | 4,52917956 | 4,29712586 | 5,04305237 |
| 7,64790132 | 6,93515435 | 8,74268038 | 7,40956145 | 5,10222586 | 8,24664943 | 8,03655918 | 8,49371823 | 8,48101571 | 7,19248442 | 7,40088842 | 6,20759149 | 7,21090269 | 6,53976618 |
| 7,25700876 | 7,08342009 | 7,47585594 | 6,73860161 | 7,83039301 | 6,95718164 | 7,39515555 | 6,86287709 | 6,6117967  | 7,58976968 | 7,15440169 | 7,0092067  | 7,28889115 | 6,91321221 |
| 6,6356284  | 6,64904296 | 6,1197339  | 6,83853407 | 7,07696803 | 6,10045477 | 6,43849029 | 5,88781257 | 5,89340791 | 6,54626075 | 6,14964977 | 6,6438381  | 5,97476676 | 6,16780664 |
| 5,97615378 | 6,07503604 | 5,69370405 | 5,44620373 | 5,61247164 | 5,55501336 | 5,73469937 | 5,70423399 | 5,94837101 | 5,84922342 | 5,95981065 | 5,75690926 | 6,29128162 | 5,97594769 |
| 9,83051249 | 9,29455953 | 10,5348683 | 9,90278134 | 7,54755066 | 10,6914985 | 10,3177701 | 10,2369672 | 9,40903108 | 9,75961591 | 9,97742901 | 9,50781144 | 9,56457172 | 9,29049408 |
| 5,44282952 | 5,26493528 | 6,3464914  | 4,30415724 | 4,89565451 | 6,03153012 | 5,20766076 | 6,76500279 | 7,2324098  | 5,30353203 | 6,42102483 | 5,52063774 | 5,61292635 | 5,74974668 |
| 6,77336027 | 6,24790971 | 5,63485512 | 5,90816809 | 7,22458237 | 6,93744972 | 7,23814165 | 6,97508911 | 6,86817427 | 7,44181877 | 7,14971796 | 7,32460226 | 6,95578973 | 7,52261075 |
| 7,45183556 | 7,44837522 | 7,10048154 | 7,11691741 | 5,56310971 | 7,21392109 | 7,84990409 | 7,15041131 | 7,89904509 | 6,54120358 | 7,49156665 | 5,24346001 | 7,00408225 | 7,12514977 |
| 3,91344535 | 4,46364375 | 3,87245579 | 3,28228617 | 4,84432229 | 3,48813462 | 4,2622049  | 3,76100252 | 3,80355225 | 4,09465996 | 3,74106567 | 3,85480092 | 3,41383704 | 3,65164975 |
| 8,14128109 | 7,53259196 | 8,74961829 | 8,02233497 | 6,83702752 | 8,16352203 | 8,26848869 | 7,95382659 | 7,43725559 | 7,57697087 | 7,38133411 | 6,8437973  | 7,98383392 | 7,2860688  |
| 7,93785447 | 7,81025752 | 8,13400413 | 7,15321629 | 7,25448143 | 7,51375248 | 7,76100698 | 7,67058846 | 8,27463963 | 8,10707378 | 8,16891442 | 6,72511124 | 7,24042515 | 7,6683306  |
| 5,15095963 | 5,72155088 | 4,12365244 | 4,45081707 | 4,9197368  | 5,96303864 | 5,97978782 | 5,95067294 | 4,86544773 | 5,51220436 | 5,81087031 | 6,05394699 | 5,89047031 | 6,21463371 |
| 5,77508847 | 4,9741046  | 4,69486341 | 4,84253594 | 6,21070358 | 5,92281513 | 6,21794415 | 5,99509621 | 5,71230064 | 6,0702489  | 5,97080195 | 6,01314582 | 5,82285369 | 6,519391   |
| 7,18112177 | 7,23129342 | 7,24678928 | 6,61078569 | 6,88606587 | 6,42303994 | 6,92370919 | 6,81679394 | 7,33045993 | 7,53300658 | 7,41371659 | 7,22275511 | 6,71262771 | 6,8637649  |
| 7,90235928 | 7,93540913 | 8,00828727 | 7,71252459 | 7,63339658 | 7,79640697 | 8,05555163 | 7,97807326 | 8,5203161  | 7,95891438 | 8,04227995 | 7,67008703 | 8,11976949 | 7,90099055 |
| 3,56845612 | 4,00130862 | 3,60402911 | 2,98477856 | 4,07890177 | 3,45193403 | 3,90990857 | 3,12008153 | 3,29989887 | 3,70997938 | 3,37236192 | 3,47417502 | 3,13768005 | 3,16055949 |
| 4,10882057 | 4,30962382 | 3,93522603 | 4,04175721 | 3,87971517 | 4,55095622 | 4,05214489 | 3,79937464 | 3,63922725 | 3,53640981 | 3,26322159 | 3,63617675 | 3,37948496 | 4,14219111 |
| 6,93969017 | 7,15848484 | 7,26182868 | 6,36111127 | 6,80901137 | 6,9304536  | 7,36482322 | 7,021175   | 6,96993653 | 6,9782318  | 6,76289687 | 6,88690556 | 6,95485514 | 6,87188808 |
| 7,21900833 | 6,8255617  | 6,15954531 | 6,84849928 | 7,39876299 | 7,58338722 | 7,52914555 | 7,45513453 | 7,2648457  | 7,22244299 | 7,34514896 | 7,0647824  | 7,5455487  | 7,50530249 |
| 7,65228504 | 7,57705202 | 7,491287   | 7,22676452 | 7,47910802 | 7,9085695  | 7,39664843 | 7,34431519 | 7,81953015 | 7,86798096 | 7,7401257  | 7,58029956 | 7,80146007 | 7,56867524 |
| 9,00938686 | 8,55160684 | 8,05891617 | 8,0842055  | 9,14591352 | 9,15182058 | 9,24213446 | 9,01706142 | 9,2063226  | 8,67791999 | 9,12637777 | 8,87432047 | 9,1103715  | 9,35150908 |
| 4,47417242 | 4,9458722  | 4,71473641 | 4,50095473 | 4,67142928 | 4,78329998 | 4,51544041 | 4,67442458 | 4,96336064 | 4,54177479 | 4,83760112 | 4,55625119 | 5,34779225 | 4,84441767 |
| 8,70891443 | 8,31461579 | 8,59113413 | 8,82896543 | 7,33369634 | 8,80582955 | 9,05446678 | 8,4629876  | 8,6017448  | 7,97896805 | 9,01373563 | 8,19280964 | 8,60881521 | 8,41187761 |
| 6,29933738 | 6,50007199 | 6,05674365 | 5,28743691 | 5,81905356 | 5,63889202 | 5,38984854 | 5,6154021  | 5,91644491 | 5,91046796 | 6,31462392 | 5,95838828 | 6,07333849 | 5,83060637 |
| 5,69427116 | 5,81467705 | 5,82103686 | 5,81232338 | 6,70635461 | 5,68826718 | 5,83868322 | 5,58775239 | 5,1376116  | 6,59230605 | 5,60534588 | 5,12823988 | 5,7072197  | 5,70810941 |
| 8,47084713 | 8,70851884 | 8,55225965 | 7,94587283 | 9,28478542 | 7,99701931 | 8,43603315 | 8,1083701  | 8,00165791 | 8,6548873  | 8,25108569 | 8,45340442 | 8,05131249 | 8,07892865 |
| 9,04115425 | 9,20224723 | 9,02242241 | 8,7316702  | 9,69722143 | 8,65317219 | 8,89205712 | 8,61779373 | 8,54386288 | 9,01416058 | 8,47459291 | 8,55968834 | 8,63215373 | 8,73377554 |
| 9,62840773 | 9,75835474 | 11,148289  | 9,08865009 | 8,56167046 | 10,6456935 | 10,2235359 | 10,8408191 | 10,5780375 | 8,09312257 | 9,88298828 | 7,98171482 | 10,1639041 | 9,47586001 |
| 5,0417684  | 5,04904946 | 4,86722908 | 4,00024454 | 5,68470603 | 5,34215172 | 6,57433434 | 6,05020437 | 6,02472815 | 5,519705   | 5,63374257 | 5,49612561 | 5,89414336 | 6,50118846 |
| 8,15501802 | 8,65741675 | 8,44074483 | 7,92597367 | 9,15395312 | 7,9374353  | 8,37425096 | 8,12113031 | 7,97941422 | 8,2873703  | 8,0080279  | 8,0939368  | 8,11450895 | 7,9264312  |

|            |            |            |            |            |            |            |            |            |            |            |            |            |            |
|------------|------------|------------|------------|------------|------------|------------|------------|------------|------------|------------|------------|------------|------------|
| 7,61722804 | 7,36657011 | 6,72588287 | 6,77979531 | 8,19487856 | 7,79395767 | 8,17774037 | 8,03882721 | 8,04298292 | 7,81340312 | 7,74468423 | 7,97549434 | 7,91831406 | 8,06661495 |
| 3,59811    | 4,06568167 | 4,58328315 | 3,30823928 | 3,71783639 | 4,61740537 | 4,07641113 | 3,8262182  | 4,21834995 | 3,81003062 | 4,32623096 | 4,17011264 | 4,8927675  | 3,78584888 |
| 10,7637837 | 11,221058  | 9,56620703 | 10,240409  | 10,7132385 | 11,3833646 | 11,3130206 | 11,2168265 | 10,8050452 | 10,8765829 | 11,2871727 | 11,3772314 | 11,2971405 | 11,6248355 |
| 5,74637565 | 6,3904962  | 5,32838375 | 4,97106058 | 6,47082421 | 5,7016298  | 6,10522233 | 6,23012098 | 5,95737554 | 6,17391036 | 5,92394037 | 6,70457253 | 5,49824841 | 5,88596647 |
| 11,4451277 | 11,6551879 | 11,3611299 | 11,01209   | 11,2825873 | 11,1358058 | 10,8347206 | 10,9278667 | 10,6430566 | 10,9058472 | 11,0302637 | 11,0394472 | 11,400831  | 10,8230816 |
| 9,09963663 | 9,27198579 | 9,4081553  | 8,74751471 | 8,58256975 | 9,55563209 | 9,37085161 | 9,12171248 | 9,66303689 | 9,19726685 | 9,531134   | 8,52509794 | 9,38701724 | 9,06417057 |
| 7,94132537 | 7,74274233 | 8,61293505 | 8,04422332 | 8,73032236 | 7,83729098 | 8,01800165 | 7,74997808 | 7,50966342 | 8,04809673 | 7,50571781 | 7,48054678 | 7,65876414 | 7,34049593 |
| 6,88303069 | 6,6529821  | 7,20325665 | 6,32792025 | 5,16007867 | 6,5872627  | 6,72077513 | 6,60182314 | 7,51769561 | 6,07028428 | 7,00038614 | 5,15605994 | 6,35130123 | 6,35942888 |
| 5,22262506 | 5,47680704 | 4,99555667 | 4,24279872 | 5,09399039 | 4,88881536 | 3,03421933 | 3,48971114 | 5,38857955 | 4,86038988 | 5,34011956 | 3,31510791 | 5,65421788 | 5,11294577 |
| 6,03467534 | 6,29997833 | 5,33085412 | 5,714973   | 6,27291656 | 6,64622456 | 6,77904871 | 6,4695059  | 6,29069182 | 6,49666931 | 6,50140875 | 6,93322909 | 6,58669276 | 6,60335076 |
| 5,63828217 | 5,4296469  | 5,50697229 | 5,24837579 | 5,64430451 | 5,64169121 | 5,93431013 | 5,5291561  | 5,49004011 | 5,78726161 | 5,59076681 | 5,42753703 | 5,50968822 | 5,52653338 |
| 6,34586566 | 6,66194304 | 6,39988181 | 6,04898814 | 7,26299248 | 6,00999631 | 6,4229119  | 6,06907063 | 5,76111534 | 6,61156403 | 6,20945911 | 6,38069617 | 5,9549791  | 6,05308472 |
| 6,67809637 | 6,97324584 | 5,52744367 | 6,16524494 | 6,6016085  | 6,97748144 | 6,8893284  | 7,05036838 | 6,49244705 | 6,38103532 | 7,10695429 | 7,57168638 | 7,37532167 | 7,3012201  |
| 10,3145709 | 10,8149872 | 8,90822763 | 9,62064669 | 10,2988438 | 10,5475718 | 10,7643215 | 10,6295185 | 10,1787999 | 10,5467384 | 10,8933115 | 10,9937026 | 10,6146505 | 11,2410292 |
| 3,51212915 | 3,49456402 | 3,3964675  | 3,37952348 | 4,10237531 | 3,93045943 | 3,51846157 | 3,78190382 | 3,20972826 | 4,7731097  | 3,94696569 | 4,13997402 | 4,43972385 | 3,55650267 |
| 7,02113879 | 6,88427329 | 7,15834423 | 6,3455462  | 4,77124198 | 7,17397638 | 7,43615837 | 7,17541747 | 7,76374192 | 5,46835866 | 6,6167763  | 4,60528779 | 7,13849469 | 6,43660183 |
| 5,48914644 | 5,55323634 | 5,11574199 | 4,96810439 | 7,00329817 | 5,03083632 | 5,91825996 | 5,78321824 | 5,88095116 | 5,45651429 | 5,16751952 | 6,21616848 | 4,91335916 | 5,76549293 |
| 9,32075209 | 9,88329469 | 8,76044241 | 8,45656754 | 9,26729573 | 8,92360171 | 9,85027673 | 9,11566774 | 9,52769192 | 8,68176451 | 9,16546584 | 9,03822858 | 9,16481624 | 9,46425639 |
| 7,78094611 | 8,31462328 | 6,46472223 | 6,64255284 | 7,00811731 | 8,09891406 | 8,64562989 | 8,40851813 | 7,94866491 | 7,39046    | 7,76286229 | 8,21061144 | 8,32188156 | 8,55352113 |
| 5,7496598  | 5,77707724 | 5,57079327 | 5,31520824 | 6,00274284 | 4,92558571 | 5,70620029 | 5,26938779 | 5,55968997 | 5,6200049  | 4,9712794  | 5,4480828  | 5,12214112 | 5,22139019 |
| 5,98546873 | 5,79994881 | 5,15483458 | 4,93912062 | 6,50296049 | 5,89930167 | 6,83290131 | 6,43226569 | 6,52032662 | 6,40019958 | 6,13992447 | 6,44878345 | 6,12118984 | 7,2921529  |
| 6,22278263 | 6,40028131 | 5,93076979 | 5,84094038 | 6,72244916 | 6,11090592 | 6,21712443 | 5,94035131 | 5,82826531 | 6,33193257 | 5,98059639 | 6,03886356 | 6,00838106 | 6,34439732 |
| 5,92733799 | 5,51227524 | 5,23542564 | 9,06285692 | 5,57340669 | 7,42383758 | 5,20564598 | 5,75735194 | 4,67931978 | 5,23913728 | 4,94878666 | 5,08452969 | 4,91936402 | 6,90277826 |
| 6,6424126  | 7,21855255 | 7,31784783 | 6,11567811 | 6,59421318 | 6,72423163 | 6,50920804 | 7,20125082 | 6,96072391 | 6,00620703 | 6,82067034 | 6,33704777 | 7,33316645 | 6,77462731 |
| 6,0911098  | 6,54709726 | 5,61472229 | 5,65358874 | 6,96809122 | 5,85569985 | 6,20873345 | 6,13200969 | 6,23683553 | 6,51033552 | 6,18856779 | 6,86405182 | 5,89590247 | 6,4118593  |
| 4,88673761 | 4,37240848 | 4,33067635 | 4,46380742 | 4,94188913 | 4,46047999 | 4,7840463  | 4,42468326 | 4,3285624  | 4,92581653 | 4,59405842 | 4,76451996 | 4,30012176 | 4,50451888 |
| 7,01830559 | 6,99931106 | 6,88801617 | 7,79916888 | 6,44628487 | 7,5754995  | 6,89006397 | 7,01065024 | 6,60689324 | 5,97764761 | 6,25108945 | 6,36336744 | 6,45480333 | 7,66853506 |
| 3,53641999 | 3,97778709 | 4,02201152 | 3,52522825 | 4,09392572 | 4,47833704 | 3,38731742 | 4,42794903 | 3,67090801 | 2,95651558 | 3,90857929 | 3,86046449 | 4,24085858 | 3,99973434 |
| 6,95987787 | 7,04394063 | 7,52751281 | 5,49382642 | 6,73764306 | 6,83844024 | 6,79509226 | 7,44554676 | 6,61068624 | 5,75050245 | 7,20291141 | 5,43342654 | 6,77085277 | 6,93247206 |
| 5,4751353  | 5,77292457 | 5,78467543 | 5,06041012 | 5,14023462 | 5,62779065 | 5,42730966 | 5,79085789 | 5,7431272  | 4,52507982 | 5,84737406 | 2,62447994 | 6,18975223 | 5,36792788 |
| 6,84251226 | 7,3455885  | 7,17299672 | 5,97362538 | 7,45279043 | 7,40627523 | 6,94989189 | 7,20702837 | 7,18880753 | 5,35617996 | 7,4189553  | 4,94583889 | 6,78817898 | 6,51190424 |
| 6,87645511 | 7,39884841 | 6,70708623 | 6,30764421 | 7,46863149 | 6,70723529 | 7,32597039 | 6,90351392 | 7,34204431 | 6,77154963 | 6,81993503 | 6,72630009 | 6,97211886 | 7,00498569 |
| 7,64179127 | 7,46568647 | 8,57121088 | 7,24838261 | 7,01575075 | 8,28806952 | 7,94441252 | 8,28761964 | 8,14015977 | 6,6913933  | 7,41224411 | 5,43063315 | 7,01298786 | 7,08843706 |
| 2,95208078 | 3,52029769 | 4,01399727 | 3,11584483 | 3,69901589 | 3,88813372 | 2,9720807  | 4,45662174 | 2,56073943 | 3,46785207 | 3,13670391 | 3,39645518 | 3,97474605 | 3,53570844 |
| 5,86601967 | 6,48546925 | 6,68441285 | 4,90967908 | 6,63762199 | 6,47581961 | 5,82430084 | 6,31496147 | 6,54005587 | 4,4929446  | 6,58876268 | 3,80495852 | 6,17499567 | 5,64049824 |
| 5,81502021 | 5,28787147 | 6,59506974 | 4,76555444 | 4,89673087 | 6,30924859 | 5,71603688 | 6,85792673 | 7,48434281 | 5,50856546 | 6,46412485 | 5,04377441 | 5,52941432 | 5,78450319 |
| 7,15565666 | 7,08629906 | 7,15958558 | 7,06237854 | 7,43673909 | 7,35982931 | 6,51236873 | 7,15177929 | 6,73326458 | 7,23313305 | 6,938682   | 8,22293679 | 7,8135304  | 7,2751808  |
| 8,53883122 | 8,35462721 | 8,92712954 | 8,02464128 | 8,70879895 | 8,67926125 | 8,13587624 | 8,45043419 | 8,22541874 | 8,66914071 | 8,49367819 | 8,56161062 | 8,8284876  | 8,56623547 |
| 3,87245867 | 4,16870721 | 4,75625764 | 3,18501943 | 3,98982389 | 4,93888845 | 4,50557924 | 4,80272847 | 4,73787506 | 4,0489819  | 4,47918045 | 4,63330379 | 4,87980456 | 3,73953848 |
| 5,20229524 | 5,24981838 | 4,66560206 | 3,7074231  | 4,50299246 | 4,46572755 | 4,24430919 | 4,50032121 | 4,35476448 | 4,79355834 | 5,00607148 | 5,65500033 | 4,73473112 | 4,52266157 |
| 5,15548456 | 5,52855535 | 4,87798587 | 4,65070405 | 5,69096257 | 5,2824938  | 5,45809108 | 5,35116291 | 5,06759098 | 5,6017989  | 5,11948817 | 5,31678809 | 5,06105914 | 5,20761302 |
| 3,39966198 | 3,79504682 | 4,48011544 | 3,41886497 | 2,49509237 | 3,81897144 | 3,79408374 | 3,94412634 | 3,3820182  | 3,30706697 | 3,81326779 | 3,59980705 | 4,30013575 | 3,94965707 |
| 4,70886707 | 4,68651157 | 4,70766194 | 4,41730249 | 5,26566974 | 4,95148578 | 4,7493431  | 3,723841   | 4,03781699 | 5,10515192 | 5,2826077  | 5,26657058 | 5,41918358 | 4,76736813 |
| 2,863479   | 3,0975694  | 3,08704401 | 2,47337882 | 2,74682102 | 2,88508043 | 2,56271057 | 3,12907269 | 3,18855233 | 2,9232404  | 3,37149487 | 3,6095773  | 3,84378281 | 3,0782566  |
| 1,89916463 | 2,72021712 | 2,88103575 | 1,43311701 | 3,21700902 | 2,10772843 | 3,17565484 | 2,19446842 | 2,15245818 | 2,59328493 | 2,21564994 | 1,56893085 | 1,15234567 | 1,5253934  |
| 6,67167384 | 5,75989336 | 6,78330649 | 6,43556033 | 6,84128976 | 6,52240587 | 6,85532484 | 6,37615464 | 5,68158768 | 5,73533668 | 6,6052188  | NA         | 6,64313073 | 5,973461   |
| 5,7095331  | 5,41643588 | 7,20073886 | 5,67850222 | 5,93478413 | 6,2315147  | 6,30349999 | 5,87347484 | 4,95449788 | 5,76065122 | 5,60413127 | NA         | 5,81237644 | 5,16608351 |



|            |            |            |            |            |            |            |            |            |            |            |            |            |            |
|------------|------------|------------|------------|------------|------------|------------|------------|------------|------------|------------|------------|------------|------------|
| 6,10163273 | 5,9973274  | 6,72229443 | 5,94371505 | 6,68169717 | 6,30393554 | 6,87450165 | 6,22807129 | 5,87670652 | 5,37252682 | 6,32411657 | NA         | 5,27602689 | 5,26562743 |
| 5,78795631 | 5,68979235 | 6,13380791 | 5,48433552 | 6,45705617 | 5,72611343 | 6,26511327 | 5,73031989 | 5,55008297 | 4,88609843 | 5,53969145 | NA         | 5,11322524 | 4,88856281 |
| 5,62825483 | 5,62579486 | 5,96359304 | 5,50283105 | 5,80003334 | 6,02599347 | 6,02032452 | 5,76189145 | NA         | 5,77928471 | 5,66405086 | 5,552508   | 5,76568354 | 5,63059846 |
| 6,11203632 | 5,79542619 | 6,60345004 | 6,0539997  | 6,11393945 | 6,48257623 | 6,73062496 | 6,27350293 | 6,04926726 | 6,10304878 | 6,46760424 | NA         | 6,15890624 | 5,50214911 |
| 5,31676661 | 5,50744638 | 5,53228105 | 5,22730003 | 5,86693297 | 5,46506666 | 5,83140694 | 5,36999073 | 5,25902314 | 7,12781328 | 5,3417434  | 5,22866342 | 5,40071572 | 5,3540844  |
| 3,79357905 | 3,96043557 | 4,22670541 | 3,32956415 | 3,77281537 | 4,27350064 | 3,73883469 | 4,53267787 | 4,12696074 | 3,28047953 | 4,14144836 | 3,81187801 | 4,79855157 | 3,58439132 |
| 6,67821844 | 7,0981015  | 6,81519564 | 6,10676264 | 6,35390012 | 6,69980507 | 6,77489435 | 7,02903335 | 6,77274762 | NA         | 6,91412256 | 6,89511098 | 7,49135673 | 6,77968541 |
| 4,80688231 | 5,51423264 | NA         | 4,2088374  | 4,94570873 | 5,21555629 | 5,44144338 | 5,67672886 | 5,19442941 | 4,88204734 | 5,27407272 | 5,07545757 | 5,2295625  | 5,85398951 |
| 4,4862823  | 3,70970528 | 4,70979187 | 3,95877048 | 4,72103125 | 4,98913462 | 5,4983432  | 4,83715494 | 4,82827648 | 4,09981276 | 5,34495091 | 3,21660576 | 4,95485682 | 4,19315529 |
| 6,72816114 | 7,42477314 | 6,71224604 | 6,42284759 | 7,76615596 | 7,19815408 | 7,29141184 | 7,29132259 | 6,05849351 | 7,28391706 | 6,70508136 | 7,51522544 | 7,09289027 | 6,97718638 |
| 6,92812961 | 7,00857451 | 5,98918914 | 6,01718423 | 7,83081453 | 6,52678803 | 7,30600506 | 5,98518086 | 7,30430329 | 7,47289053 | 7,38201149 | 7,92863155 | 7,02590603 | 7,45715194 |
| 4,35956348 | 4,51642695 | 4,00248372 | 4,65606068 | 4,74064774 | 4,60063919 | 4,08019959 | 4,0991109  | 4,04421984 | 4,45295872 | 4,19462779 | 5,11682889 | 4,62431477 | 4,32506298 |
| 5,80344326 | 5,93377946 | 5,78945686 | 5,66544202 | 6,54591994 | 6,1086007  | 5,88975048 | 6,01243801 | 5,60820843 | 6,60142674 | 6,01298541 | 6,51168198 | 6,59667287 | 5,92797029 |
| 8,75768376 | 7,997364   | 8,9341234  | 8,8273853  | NA         | 9,17284732 | 9,17307883 | 8,79248821 | 8,54992587 | 7,76478046 | 8,71399098 | 7,58909808 | 8,37521637 | 8,30392408 |
| 5,29117852 | 5,21643119 | 4,64489644 | 4,2914684  | 3,29352102 | 3,98098534 | 4,54332966 | 4,37929005 | 5,47819947 | 4,84969503 | 4,80593806 | NA         | 3,96964594 | 4,6260663  |
| 4,19324361 | 4,08417673 | 3,91483715 | 4,68463043 | 5,09858966 | 5,06952925 | 4,59694968 | 4,63393872 | 4,36000416 | 4,91316309 | 5,06973301 | 5,89842435 | 5,3762113  | 5,26468801 |
| 4,73532711 | 5,19421053 | 5,19632357 | 4,44019646 | 5,67830835 | 4,7414617  | 5,21238997 | 4,75523433 | 4,67895174 | 5,02556175 | 4,62547855 | 4,05147425 | 4,39460538 | 4,44729746 |
| 6,00918472 | 5,51098655 | 5,48457487 | NA         | 6,70132326 | 6,1567035  | 5,83562843 | 5,42194659 | 5,52516583 | 6,14692795 | 6,08395703 | 6,18949843 | 5,80896175 | 6,07060112 |
| 5,02859356 | 4,14449263 | 4,56439262 | 4,42237656 | 4,6439201  | 4,94275325 | 5,18278281 | 4,90088368 | 4,66913937 | 4,64813889 | 5,08295359 | 4,53717669 | 4,86106434 | 4,85390115 |
| 7,50159242 | 7,72795884 | 7,39298416 | 7,19944085 | 7,63704911 | 7,29378806 | 7,20542676 | 7,43144602 | 7,57148919 | 7,57582612 | 7,73674254 | 7,35497654 | 7,53871186 | 7,44983924 |
| 5,32389244 | 6,14673293 | 5,15657569 | 4,06390937 | 5,52796806 | 5,0216463  | 5,52182282 | 5,2881113  | 6,35264026 | 4,3000941  | 5,32750909 | 3,96021285 | 4,63773569 | 5,39991957 |
| 7,60801331 | 8,66779844 | 6,88624471 | 6,880112   | 8,20800135 | 6,93259697 | 7,64493823 | 7,51896117 | 8,20218637 | 7,21249505 | 7,67002766 | 8,16970348 | 6,95619546 | 7,75181236 |
| 6,65824118 | 6,94962878 | 6,98640246 | NA         | 5,8805272  | 6,58894203 | 6,37810738 | 6,26972565 | 6,13353936 | 5,93591065 | 6,33837611 | 4,78864286 | 6,31503894 | 5,38166176 |
| 6,81355803 | 6,45530381 | 6,89820587 | 6,63433781 | 6,90416143 | 7,20151742 | 6,95657914 | 6,90664518 | 6,3579054  | 6,80612736 | 6,78626039 | 6,81051137 | 6,97397777 | 6,4728522  |
| 5,43891223 | 6,25619072 | 6,57113415 | 6,17749072 | 7,2730158  | 6,74429006 | 6,13324773 | 6,33209098 | 5,94101492 | NA         | 6,79346398 | 6,08190827 | 7,43530584 | 6,53105449 |
| 4,68036027 | 4,70636276 | 4,61125574 | 4,55701398 | 4,74184029 | 4,2083435  | 4,06016714 | 4,5203395  | 4,42173906 | 4,82015248 | 4,84100296 | 4,22118361 | 4,10433353 | 4,58163565 |
| 4,7027954  | 4,72343144 | 5,10966515 | 4,92008919 | 4,65654551 | 4,62854042 | 4,53475715 | 4,76366366 | 4,30955377 | 3,94107807 | 4,67948952 | 4,17152214 | 4,69345266 | 4,63078179 |
| 4,64892539 | 5,02493321 | 5,69902982 | 4,43840399 | 5,24931978 | 5,47981578 | 5,02483196 | 5,4324192  | 4,54743977 | NA         | 5,42995877 | 3,75569067 | 5,02078521 | 4,5908106  |
| 4,28034315 | 4,3868623  | 3,70278999 | 4,00289924 | 4,13411216 | 4,13905585 | 4,24358307 | 3,83656728 | 3,69164503 | 3,17518654 | 3,64465167 | NA         | 3,82991139 | 4,24288074 |
| 7,83166315 | 7,44746021 | 7,85046503 | 7,21570268 | 7,75972083 | 7,82236504 | 7,50731671 | 7,71129302 | 7,4657431  | 7,55703196 | 7,70487487 | 7,34475617 | 7,67056305 | 7,62841743 |
| 6,52771986 | 5,75665102 | 5,77806943 | 5,34283892 | 5,67050112 | 6,09066506 | 5,60867584 | 5,57054053 | 6,19975879 | 5,6707583  | 5,67085082 | 5,68110994 | 5,71889736 | 6,31473575 |
| 5,10887338 | 5,17588967 | 5,02694037 | 4,94020437 | 5,19290437 | 5,13155133 | 4,95910246 | 4,64856927 | 4,89852155 | 5,34800701 | 5,06855951 | 5,26711514 | 5,05900995 | 4,84475291 |
| 6,0841015  | 5,73946339 | 5,56479609 | 6,01056036 | 5,97659424 | 5,94577379 | 5,2159241  | 5,93831993 | 5,42871232 | 5,34547269 | 5,63609518 | 7,07414313 | 6,02848491 | 5,83770908 |
| 3,92654094 | 3,63805428 | 3,32799028 | 3,43742667 | 4,13805947 | 4,15996377 | 4,00825179 | 3,63479407 | 3,5371942  | 4,0947269  | 3,82574839 | 3,29955847 | 3,50672571 | 3,86875133 |
| 6,06043834 | 6,15713429 | 5,77590537 | 6,25240491 | 6,65006209 | 6,14049771 | 5,9588827  | 6,69186655 | 5,58041064 | 6,04665483 | 6,13215282 | 7,09461653 | 6,07699569 | 6,16464394 |
| 4,45304274 | 4,69251956 | 3,82484823 | 3,77033141 | 4,04722637 | 3,92439887 | 3,90993504 | 3,87584711 | 4,56296709 | 4,36012217 | 4,54558327 | 4,88711941 | 4,54106763 | 4,68555337 |
| 5,55307841 | 6,02091356 | 6,10322175 | 4,73144054 | 5,99584106 | 6,04829818 | 5,53140035 | 5,83876471 | 6,00374577 | 4,31569309 | 6,06569581 | NA         | 5,68695169 | 5,29149081 |
| 4,34482992 | 4,28300136 | 5,13162919 | 4,45723227 | 4,25698649 | 4,70568023 | 4,12092066 | 4,77034253 | 4,25071588 | 4,86128024 | 4,53813957 | 3,66232431 | 4,30998714 | 4,3364824  |
| 6,0751218  | 6,3626609  | 6,79020362 | 5,06292785 | 6,65693027 | 6,75255106 | 6,25638192 | 6,54828702 | 6,63969717 | 4,35184401 | 6,87752164 | NA         | 5,93971607 | 5,50887053 |
| 4,69496173 | 4,56432509 | 5,02446336 | 4,71095859 | 4,70403125 | 4,46599231 | 4,46873078 | 4,68501432 | 4,36724576 | 4,31440489 | 4,89937626 | 4,01287601 | 4,1402358  | 4,52140257 |
| 4,74458831 | 4,64194756 | 4,46509121 | NA         | 4,52587741 | 4,71871634 | 4,50814995 | 4,37773083 | 4,35958706 | 4,53797904 | 4,5332942  | 4,51319765 | 4,49269117 | 4,64090905 |
| 4,68162655 | 3,10935686 | 5,03235622 | NA         | 2,89995832 | 5,02362314 | 4,74967117 | 5,01997954 | 5,16259235 | 5,09518582 | 5,10639279 | 4,81113474 | 5,33884186 | 3,40431006 |
| 5,53351657 | 5,37516572 | 4,48994667 | 5,77565038 | 5,80033867 | 5,2370667  | 4,86745027 | 5,37232225 | 5,15005472 | 5,49393237 | 5,1210042  | 6,58184157 | 5,29974503 | 5,74814875 |
| 4,98273304 | 4,89369401 | 4,55923471 | 4,05601148 | 4,20134305 | 4,28816556 | 3,93622079 | 4,43820752 | 4,75319155 | 4,99355755 | 4,52533382 | 4,97063432 | 4,97748461 | 4,82649878 |
| 6,02149503 | 5,22539307 | 5,09125068 | 4,63032413 | 4,9359917  | 5,06196056 | 4,82916566 | 4,83051085 | 5,94537678 | 4,97112831 | 4,93878667 | 4,73035408 | 5,0064092  | 5,6779809  |
| 6,43994708 | 6,59658942 | 6,46391805 | 6,73631828 | 7,22448827 | 6,48175013 | 6,64355353 | 7,10210554 | 6,18092827 | NA         | 6,55086587 | 7,51900116 | 7,09475757 | 6,80995945 |

|            |            |            |            |            |            |            |            |            |            |            |            |            |            |
|------------|------------|------------|------------|------------|------------|------------|------------|------------|------------|------------|------------|------------|------------|
| 6,10261114 | 5,71298797 | 6,47045861 | 6,27785429 | 6,3378219  | 5,84944376 | 5,98107176 | 5,68469976 | 5,45517793 | 6,28134844 | 5,61190198 | 5,72379279 | 5,82882776 | 5,56194288 |
| 5,79068201 | 5,79314381 | 5,76351462 | 5,59607713 | 5,96159142 | 6,02431881 | NA         | 5,70303712 | 5,36560889 | 5,69013488 | 5,64469649 | 6,48436852 | 6,2260994  | 5,90890753 |
| 5,89792553 | 4,95886313 | 5,21363041 | 4,80645859 | 5,36021777 | 5,11522766 | 4,3988611  | 4,79957616 | 4,4094088  | 5,80634363 | 4,88780195 | 5,8113782  | 4,92997091 | 4,89981552 |
| 5,2202346  | 6,04061115 | 5,06903724 | NA         | 5,19406715 | 6,67727583 | 6,65755773 | 6,97808037 | 5,40609606 | 4,88562504 | 6,20864345 | 5,77669513 | 6,94922524 | 6,64173047 |
| 5,46726338 | 5,81780982 | 4,78251757 | NA         | 4,77634534 | 5,96419031 | 6,24477164 | 5,74944785 | 5,54113933 | 5,77725343 | 6,12838752 | 5,02288708 | 5,57752216 | 6,13308143 |
| 5,57102962 | 5,5077161  | NA         | 6,4021772  | 5,30291131 | 6,39393744 | 6,28226301 | 5,98818218 | 5,63931305 | 5,64102065 | 5,99492974 | 6,05584015 | 6,04419845 | 6,32003884 |
| 10,8770389 | 4,58766025 | 10,0583755 | 4,27022902 | 8,03279238 | 7,42758263 | 5,47081512 | 9,52531471 | 4,31178014 | NA         | 4,06003482 | 6,57670049 | 9,5506033  | 5,3168237  |
| 7,91649249 | 8,20693652 | 8,36563031 | 7,33270588 | NA         | 8,54165707 | 9,0952181  | 8,34448743 | 7,719947   | 5,17256778 | 8,01633397 | 6,67538975 | 7,54356107 | 7,53337166 |
| 4,64400692 | 4,59037719 | 4,60943402 | 4,35886708 | 4,68694003 | NA         | 4,9092955  | 4,46279276 | 4,32444862 | 4,78301173 | 4,55536183 | 4,60205575 | 4,58665526 | 4,26319697 |
| 5,37879733 | 5,68630182 | 5,11908576 | NA         | 5,7982714  | 5,11454564 | 5,57503155 | 5,09260611 | 5,13531072 | 5,64473224 | 5,46961397 | 5,59878387 | 5,41958372 | 5,25694244 |
| 7,75080667 | 8,27334282 | 6,50706755 | 7,14964146 | 7,76333495 | 8,13573681 | 7,91241145 | 7,99492369 | 8,09350874 | NA         | 8,184169   | 7,63402447 | 8,59841631 | 7,91264943 |
| 4,07897903 | 3,13550637 | 3,33731416 | 3,4701158  | 3,53158246 | 4,04465588 | 4,2390666  | 3,62326368 | 3,37244028 | 3,73330567 | 4,10694592 | 3,63026164 | 3,49109519 | 4,05626042 |
| 4,96166531 | 4,49715362 | 4,61564646 | 4,49835703 | 4,62511784 | 4,76989339 | 3,85923083 | 4,34096185 | 4,50180105 | 4,35858531 | 4,30967206 | 4,38510232 | 4,22229838 | NA         |
| 5,66312689 | 4,52227573 | 5,15354676 | NA         | 3,72439826 | 4,86241383 | 4,10439587 | 5,2181356  | 5,62588124 | 3,74828304 | 3,9235377  | 4,4701397  | 4,58395597 | 5,09987133 |
| 4,96238045 | 5,16117736 | 6,42186196 | 4,90956234 | 6,46176682 | 6,341198   | 5,79480903 | 5,51568491 | 5,49925182 | NA         | 6,40181621 | 5,30209829 | 6,34847416 | 5,82815468 |
| 4,16895642 | 4,56730989 | 3,9508458  | 2,34828561 | 2,62936788 | 3,80889825 | 4,86766016 | 4,03438843 | 4,37122778 | 3,00339673 | 3,41699422 | NA         | 2,90781302 | 4,12836697 |
| 6,40513697 | 6,17877429 | 6,00906118 | 5,83853939 | 5,85181876 | NA         | 5,85082863 | 6,00372136 | 6,08184401 | NA         | 6,3292441  | 6,12280653 | 6,57762486 | 6,14852652 |
| NA         | 5,94785304 | 7,04055437 | 5,86593843 | 7,26596616 | 6,87352377 | 6,11235679 | 6,23590859 | 6,16055473 | NA         | 6,86766927 | 6,26822354 | 7,34509781 | 6,66844762 |
| 6,2389173  | 6,06555624 | 6,0892236  | 5,76327774 | NA         | 6,16205584 | 6,01941215 | 5,9200274  | 6,59030817 | 4,45666457 | 6,10441576 | NA         | 6,05744401 | 5,75777684 |
| 3,64178048 | 4,76389522 | 4,79496711 | NA         | 4,71235506 | 4,96064586 | 4,59695913 | 4,69768942 | 4,79919194 | 4,22157025 | 4,62993711 | 3,44801599 | 4,88303177 | 5,04140195 |
| 4,78750175 | 4,90325903 | 4,90599545 | NA         | 5,22597875 | 4,81279354 | 4,9602928  | 4,73516389 | 4,52297699 | 5,04436547 | 4,66319504 | 4,24389614 | 4,65395196 | 4,72456857 |
| 3,48587057 | 3,83805054 | 4,38036072 | 3,53070677 | 3,75165011 | 4,46449729 | 4,13224163 | 3,97098636 | 3,70856088 | NA         | 4,25575079 | 2,6488076  | 4,07144208 | 3,79561971 |
| 7,18542897 | 7,25303738 | 6,52750574 | 6,99774854 | 5,52718935 | 5,35751176 | 5,11978475 | 5,83925425 | 7,34711952 | NA         | 5,23004679 | 6,62043716 | 7,02071265 | 4,77151538 |
| 7,04616571 | 6,73452123 | 6,66574422 | 6,73238036 | 6,93819215 | 6,92353044 | NA         | 6,79668232 | 6,6491815  | NA         | 6,52713236 | 7,67559526 | 7,25460902 | 6,8058822  |
| 4,57150975 | 4,72431274 | 4,22053564 | 3,94169882 | 4,01140395 | NA         | 4,21119342 | 4,35483474 | 4,63794296 | 4,45396289 | 4,56509273 | 4,67375369 | 5,01600036 | 4,62517569 |
| 5,02541782 | 4,73645796 | 4,5149918  | 4,09552761 | 4,15354046 | 3,87407317 | 3,99557787 | NA         | 4,87792992 | 4,32669397 | 4,68829639 | 4,40842471 | 4,83105687 | 5,05599512 |
| 2,92660839 | 4,22837127 | 4,66077037 | 4,1659882  | 3,80644474 | 4,81827312 | 4,56777743 | 4,8098438  | 4,36698224 | 4,09807412 | 4,82172241 | NA         | 5,15739887 | 3,98805889 |
| 4,27085238 | 3,50954419 | 4,12185158 | 3,70473347 | 4,05825117 | 4,47651363 | 3,75894468 | 4,1200305  | 3,48370231 | 4,57412423 | 3,75965297 | NA         | 4,16608614 | NA         |
| 2,04534053 | 1,39523817 | 2,6617311  | 2,0553033  | 1,49392772 | 2,44898272 | 1,36838725 | 3,04218434 | 1,28053364 | 2,10158419 | 1,17329682 | 3,8056487  | 2,58097574 | 2,30500474 |
| 2,25709639 | 2,07722088 | 2,30397933 | 1,81664751 | 2,75444006 | 2,50321999 | 2,39793537 | 2,63621949 | 2,11737881 | 1,8161037  | 2,52988864 | NA         | 1,85984593 | 2,35316357 |
| 5,67326903 | NA         | 5,57970368 | 5,71184491 | 5,50952779 | 6,18587242 | 6,27243493 | 5,82924648 | 5,43768322 | 5,20828452 | 6,11001139 | NA         | 5,83980121 | 5,29786594 |
| NA         | 6,61985996 | 7,29076002 | 6,4411464  | NA         | 7,72000157 | 7,14162411 | 7,97876229 | 8,22030173 | NA         | 7,63450121 | 7,25903037 | 7,52411759 | 7,10000844 |
| 6,5309539  | 3,19508333 | 6,4876839  | 4,32808073 | 5,63653281 | 4,59954364 | 6,01539867 | NA         | 6,96140545 | 7,03537265 | 7,60200941 | 6,77687946 | 6,06099487 | 6,65985658 |
| 6,37616178 | 6,15691139 | 4,88011675 | NA         | 6,58364736 | 6,38734735 | 6,83072769 | 6,36672334 | 6,39367085 | 6,35117239 | 6,32276462 | 6,36042489 | 6,12788583 | 6,93925059 |
| 5,89997618 | 5,94920824 | 5,37795906 | NA         | 5,6643166  | 5,53903585 | 5,79890761 | 5,45945217 | 5,64843025 | 5,62735922 | 5,66287549 | 5,55514164 | 5,66982508 | 5,83631193 |
| 2,84184008 | 3,46284671 | 3,42268191 | 2,25162188 | 4,22892424 | 2,69087294 | 3,29830969 | 2,72311516 | 2,89957529 | 2,96416637 | 1,4000663  | 1,85007351 | 2,31183187 | 2,28275534 |
| 4,33375766 | 3,98651202 | 4,73587256 | 4,09504319 | 4,22049386 | 3,92286361 | 4,69313252 | 4,51537542 | 3,70997303 | 4,02155096 | 4,82377043 | 2,90502651 | 4,38074516 | 3,70829372 |
| 5,02697563 | 5,20122437 | 4,88939226 | 4,81165491 | 5,16341914 | 4,95634134 | NA         | 4,80799268 | NA         | 4,62395571 | 4,94440565 | 4,27860657 | 4,90528367 | 4,83277445 |
| 6,9122236  | 6,58032149 | 7,11751811 | 6,44045423 | 5,43332401 | 7,76494031 | 7,48121154 | 8,26608423 | 7,48280889 | NA         | 6,44112384 | 6,25075888 | 7,48233825 | 7,74008717 |
| 2,62981729 | 2,9328606  | 3,34653657 | NA         | 2,43157738 | 3,14929689 | 2,981437   | 3,53200602 | 2,96373375 | 2,1727432  | 3,54253274 | NA         | 3,79102349 | NA         |
| 4,02357035 | 3,9129289  | 3,63751334 | 3,37033225 | 2,12916751 | NA         | 3,00784849 | 2,97085255 | 4,18801955 | 4,50031709 | 3,58064725 | 2,99127215 | NA         | 3,47554719 |
| 5,41230108 | 5,26368592 | 3,88356441 | 6,51900207 | 6,25105421 | 4,51412038 | 5,33943554 | 5,39133857 | 5,47395302 | 4,84907054 | 4,45820691 | 5,65940356 | 4,43942911 | 5,54008582 |
| 2,81475249 | 3,00070639 | 3,21819949 | 2,75747324 | 3,47785171 | NA         | 3,09617454 | 2,93714164 | 2,66164749 | 3,26395574 | 2,60795827 | NA         | 2,86102405 | 5,722315   |
| 3,58345843 | 3,66106445 | 3,31823681 | NA         | 3,57819443 | 3,10848023 | 3,70701421 | 3,3589156  | 2,81308955 | 3,40537192 | 3,44436036 | 3,49646832 | 3,09864011 | 3,2128011  |
| 5,12101788 | 4,50527635 | 4,18527521 | 4,87777864 | 4,61951999 | 4,74407659 | 3,99301283 | 4,64092687 | 4,21097204 | NA         | 4,09858378 | 5,58666505 | 4,29824233 | 4,68184821 |
| 3,02987176 | 3,2025205  | 3,30631548 | 2,3034463  | 2,96154047 | 3,75142394 | 2,62078372 | 3,82669585 | 3,45760111 | NA         | 2,96271454 | 2,64321287 | 2,74021999 | 3,17648073 |
| 5,39897957 | 5,82028138 | 6,962079   | 4,5835655  | 5,08417639 | 7,37034314 | 6,88520051 | 7,02898211 | 6,54143986 | 5,09039642 | 4,89460564 | 3,85900822 | 6,11221054 | 5,74168797 |

|            |            |            |            |            |            |            |            |            |            |            |            |            |            |
|------------|------------|------------|------------|------------|------------|------------|------------|------------|------------|------------|------------|------------|------------|
| 4,49853795 | 4,57941484 | NA         | 3,83759129 | 4,38082771 | 3,98326717 | 3,98004959 | NA         | 4,73340142 | 4,29886901 | 4,56015767 | 4,76013526 | 4,66105182 | 4,88817875 |
| 4,57336909 | 5,30503287 | 4,18685132 | NA         | 4,81491292 | 4,56724621 | 4,75123686 | 4,46710167 | 5,49065623 | 4,16435384 | 4,11732618 | 4,33328997 | 4,02453652 | 4,88557602 |
| 5,57913932 | 5,13715851 | 5,44934099 | 5,16021021 | 4,04948568 | NA         | 5,33389797 | 5,10654946 | 5,82320464 | 5,32639928 | 5,22893682 | 4,5728765  | 4,67368739 | 4,88843755 |
| 5,27995412 | 4,5462824  | 5,33995325 | 4,60615429 | 2,79443638 | 4,67601733 | 5,11391816 | 5,11029654 | 4,64056372 | 4,16838198 | 4,08878561 | 2,57982362 | 4,25868939 | 4,70298136 |
| 4,48653283 | 4,84488554 | 3,5837768  | 3,7743686  | 5,34902975 | 4,01046112 | 4,66087617 | 4,32570634 | 4,9332647  | 4,69903575 | 4,30829582 | 4,89728065 | 4,10507131 | 4,06065541 |
| 4,65940733 | 4,89322292 | 4,04657395 | 3,27502712 | NA         | 4,95518031 | 5,46606133 | 5,51210529 | 4,67105586 | 3,5736328  | 3,54518713 | 5,4038466  | 3,4996044  | 4,98583279 |
|            |            |            |            |            |            |            |            |            | NA         |            |            |            |            |

| LDOPA-<br>LESION2 | LDOPA-<br>LESION3 | LDOPA-<br>LESION4 | LDOPA-<br>LESION5 | LDOPA-<br>LESION6 |
|-------------------|-------------------|-------------------|-------------------|-------------------|
| Int (log2)<br>7   | Int (log2)<br>3   | Int (log2)<br>6   | Int (log2)<br>2   | Int (log2)<br>4   |
| 10,2746133        | 10,7850669        | 10,5257379        | 10,3134851        | 10,0559888        |
| 4,5794917         | 4,58135914        | 4,64665836        | 4,36898406        | 4,28367805        |
| 5,97552024        | 6,76786415        | 5,88823954        | 5,85023466        | 5,28690106        |
| 6,3623957         | 6,1804732         | 6,25456678        | 6,1318126         | 6,20760108        |
| 4,36314314        | 4,59337732        | 3,58944818        | 4,57348004        | 3,0951421         |
| 3,96588947        | 3,85082439        | 3,93646563        | 3,79810098        | 3,41235882        |
| 6,9601146         | 6,98385863        | 6,77209019        | 6,79494983        | 6,65945333        |
| 3,9704099         | 4,39566465        | 4,14090023        | 4,17652784        | 3,30712168        |
| 9,88078177        | 9,868173          | 9,84511449        | 9,65031159        | 10,1067819        |
| 9,66698883        | 9,56701995        | 9,315678          | 8,66787417        | 9,53645691        |
| 5,06902533        | 5,55334696        | 4,9846791         | 5,36323396        | 5,37437625        |
| 9,11554959        | 9,63409077        | 9,24773206        | 9,15357552        | 10,0039341        |
| 6,00969138        | 4,78863179        | 6,32391503        | 5,33899146        | 5,52382572        |
| 11,9615349        | 12,1460683        | 12,0110763        | 11,7580688        | 12,3543906        |
| 4,95570317        | 4,7595937         | 4,8492842         | 4,65087683        | 4,69093191        |
| 7,81693333        | 7,57559784        | 8,24421665        | 7,23469316        | 8,19816132        |
| 5,0808444         | 4,99229401        | 5,16493835        | 5,12255912        | 5,1374734         |
| 5,16130071        | 5,16304147        | 5,17213553        | 5,10329981        | 4,87859054        |
| 4,39045166        | 3,67760654        | 3,73773722        | 3,59012702        | 4,25147491        |
| 6,69121089        | 6,59543476        | 7,08585614        | 7,03860433        | 5,98969895        |
| 5,71060293        | 5,5900034         | 6,00725488        | 6,16216905        | 5,79301043        |
| 6,97701011        | 7,16094378        | 6,46377179        | 5,76940459        | 6,71266614        |
| 12,2747864        | 12,6463338        | 12,3290695        | 12,4792709        | 12,8073459        |
| 9,80283986        | 9,60620866        | 9,47232079        | 8,78216703        | 9,56446191        |
| 6,22059162        | 6,13864347        | 6,45001207        | 5,87833703        | 6,12554098        |
| 4,76094091        | 4,81003088        | 4,26330215        | 4,58942437        | 4,04917116        |
| 12,0545998        | 12,2802568        | 12,1032235        | 11,9284751        | 12,4721301        |
| 4,52050354        | 4,38119671        | 4,19006755        | 4,30246086        | 3,69698352        |
| 4,60678465        | 4,54590179        | 4,70135637        | 4,77162455        | 4,52698434        |
| 6,16753634        | 5,57706738        | 6,57494423        | 5,73861595        | 5,66009648        |
| 5,7112139         | 5,43707087        | 5,20937315        | 4,58522359        | 5,22881096        |
| 6,28872415        | 5,83462158        | 6,49671382        | 6,20942083        | 5,84355507        |
| 6,6239568         | 5,97540468        | 6,56511519        | 6,3724921         | 6,49209773        |
| 6,81383223        | 6,65916142        | 6,3389976         | 5,57104306        | 6,67911231        |
| 6,20522857        | 5,86915546        | 6,18146799        | 5,59341616        | 6,10876834        |
| 5,74104599        | 5,75066868        | 5,89277716        | 5,94802153        | 5,52585175        |
| 4,66204839        | 4,96515442        | 4,96190975        | 4,90486283        | 4,39374315        |
| 6,168794          | 6,21310952        | 6,35969584        | 6,37504796        | 6,49217551        |
| 6,46374491        | 6,38734552        | 6,38013912        | 6,49819692        | 6,08624577        |
| 7,37425645        | 7,26846335        | 7,46151818        | 7,32039743        | 7,66114353        |
| 11,4503371        | 11,9987544        | 11,3987203        | 11,7703172        | 12,1997347        |

|            |            |            |            |            |
|------------|------------|------------|------------|------------|
| 6,36972548 | 5,82149805 | 6,0518384  | 6,506306   | 5,95472804 |
| 9,51857952 | 9,50913879 | 9,54679787 | 9,48190785 | 9,59946981 |
| 7,59240586 | 7,39805329 | 8,00050011 | 8,23480086 | 7,47461648 |
| 7,25349366 | 7,54616505 | 7,47454257 | 8,14213596 | 6,54003489 |
| 4,10501518 | 4,38554122 | 4,22777352 | 4,40547123 | 4,73083797 |
| 6,87537877 | 6,70938203 | 6,43578677 | 5,73924747 | 6,37550587 |
| 7,19689532 | 6,73118708 | 7,04148231 | 6,21813442 | 6,92780145 |
| 6,04030939 | 6,0822811  | 5,67841745 | 5,04343545 | 5,70983298 |
| 5,30638771 | 4,74723707 | 5,2844396  | 5,11700404 | 5,3632065  |
| 4,80870357 | 4,76080874 | 4,96933602 | 4,90343214 | 5,28465022 |
| 3,99384102 | 3,67438613 | 3,85333179 | 4,21339224 | 4,00596995 |
| 6,73762613 | 6,39256006 | 6,51496774 | 6,0148698  | 6,78322831 |
| 6,18948264 | 6,05295426 | 6,51795247 | 6,56231142 | 5,49307191 |
| 4,39751122 | 4,14975831 | 3,79071237 | 3,4804485  | 3,83698669 |
| 10,2917332 | 10,354038  | 10,3388755 | 10,2608217 | 10,7152848 |
| 4,35905597 | 4,32950511 | 4,77100854 | 4,54331826 | 4,63888008 |
| 5,52995889 | 5,47381732 | 6,05329705 | 5,55580103 | 5,44673396 |
| 6,51389923 | 6,97770844 | 6,60510753 | 6,05058854 | 6,52578245 |
| 8,51369589 | 8,62472742 | 8,45194268 | 8,49350738 | 8,62954928 |
| 8,5856756  | 8,18774986 | 8,36281906 | 7,83491743 | 8,43398949 |
| 8,24544987 | 8,85495921 | 8,46103731 | 4,79393059 | 8,83109801 |
| 8,49979386 | 9,04892176 | 8,41601314 | 8,29221182 | 8,83862829 |
| 8,00644694 | 7,43986146 | 8,04829561 | 7,80415301 | 7,5852744  |
| 5,53536783 | 4,75035529 | 5,40063278 | 4,858128   | 5,01798382 |
| 4,93520872 | 5,04845481 | 4,97470688 | 4,65724506 | 4,12691455 |
| 8,36954137 | 8,30301061 | 8,68977844 | 8,77997909 | 8,4533829  |
| 9,54015117 | 8,98501979 | 9,6098644  | 8,88946294 | 9,29403653 |
| 6,23212948 | 5,94463967 | 5,94953796 | 4,78569483 | 6,14249195 |
| 6,8314816  | 6,26007034 | 6,72519352 | 5,86611472 | 6,5291127  |
| 4,77229282 | 4,55571397 | 5,00689696 | 4,68687965 | 4,58357483 |
| 8,38641032 | 8,68567992 | 8,33876287 | 8,85124051 | 7,79331764 |
| 4,5524589  | 4,9145438  | 4,3316056  | 4,90133641 | 4,99747971 |
| 6,59531093 | 6,70557941 | 6,56727961 | 6,86192105 | 5,8223481  |
| 6,98741763 | 8,2649535  | 6,87634074 | 8,42541191 | 9,09548227 |
| 8,68899878 | 8,41894544 | 8,48281914 | 7,83884716 | 8,50419596 |
| 4,30211505 | 4,70704427 | 3,91317433 | 4,83631468 | 4,76901772 |
| 7,83676734 | 7,95634709 | 8,09066576 | 8,9875041  | 7,21301896 |
| 8,33421882 | 8,20727578 | 8,69445277 | 8,43253647 | 8,29013628 |
| 5,61985818 | 5,7800874  | 5,93192053 | 5,91678674 | 5,65110358 |
| 3,25816613 | 2,74285831 | 3,46075532 | 3,43822182 | 3,43848291 |
| 9,88981347 | 10,082614  | 9,65634907 | 9,754055   | 10,1396481 |
| 6,88441962 | 7,4169145  | 6,7492146  | 7,38411701 | 6,3831386  |
| 10,1978713 | 10,2721636 | 10,3403258 | 9,95559925 | 10,5163141 |
| 6,36373488 | 5,66956024 | 6,40272834 | 6,34735169 | 6,05542273 |
| 11,7731882 | 11,8162269 | 11,721046  | 11,8713129 | 11,3214922 |
| 8,01081257 | 7,48265497 | 7,71106194 | 7,77566129 | 7,59780054 |
| 5,39711873 | 5,63618608 | 5,57039141 | 5,72643742 | 5,44918113 |

|            |            |            |            |            |
|------------|------------|------------|------------|------------|
| 5,91686549 | 5,70453944 | 5,90669577 | 5,86087632 | 5,87377296 |
| 5,28448905 | 5,14115017 | 5,26990205 | 5,09870876 | 5,08443795 |
| 10,5612461 | 10,6583599 | 10,3741732 | 10,1550198 | 10,8467494 |
| 7,74347888 | 8,64099354 | 8,40240585 | 8,57379069 | 9,42095016 |
| 10,1928883 | 10,3843764 | 10,1134082 | 10,3286862 | 9,54052795 |
| 4,70678094 | 5,18954073 | 4,87674267 | 5,16639253 | 5,17634652 |
| 7,38787453 | 7,53315028 | 7,44397281 | 7,17361327 | 7,51918735 |
| 11,0976428 | 11,4192209 | 10,9871112 | 11,5448536 | 10,8916428 |
| 4,57142363 | 5,08167802 | 4,59446381 | 5,1236191  | 5,18140592 |
| 5,99912906 | 6,79011921 | 5,68478046 | 6,59105742 | 5,60802283 |
| 8,16154759 | 7,6095167  | 7,8630036  | 7,75518273 | 7,76265869 |
| 11,6479444 | 11,4423591 | 10,2197724 | 11,5656247 | 11,2015047 |
| 4,81720857 | 4,97394751 | 4,6782563  | 5,0631521  | 5,25423314 |
| 9,02826272 | 9,37814724 | 8,78683088 | 9,16510577 | 8,69541912 |
| 14,2478461 | 14,3350578 | 13,9490859 | 14,3408494 | 14,1233295 |
| 10,318755  | 10,4354343 | 9,87210738 | 10,3854945 | 9,92384121 |
| 4,96279479 | 4,58311888 | 5,13387252 | 4,75815132 | 4,89106261 |
| 7,98141009 | 8,26648917 | 7,18181205 | 8,18450514 | 8,05826817 |
| 7,37169716 | 7,22699363 | 7,37746334 | 7,17348846 | 7,41153433 |
| 6,64753356 | 6,24605335 | 6,8240224  | 6,08780502 | 6,29889216 |
| 5,61085305 | 5,94951575 | 5,87036715 | 5,87639592 | 6,13974125 |
| 10,0221562 | 10,2140368 | 9,62026618 | 10,1446716 | 9,65540298 |
| 5,03570331 | 5,96128924 | 5,77163435 | 5,730179   | 6,87351016 |
| 7,03866473 | 6,8367369  | 7,01407557 | 7,3197417  | 6,29221175 |
| 7,69642244 | 7,62375589 | 7,60172229 | 7,25048846 | 7,6772247  |
| 4,03724538 | 3,84425419 | 4,01755882 | 4,0674622  | 3,60743486 |
| 8,09015595 | 8,21439162 | 8,22976687 | 8,2682711  | 8,27548736 |
| 8,41064476 | 8,26734794 | 8,03632064 | 7,6773137  | 8,45042921 |
| 5,10415736 | 5,29894192 | 4,77581774 | 5,50053424 | 4,44183017 |
| 6,16204038 | 5,88764541 | 5,99267023 | 6,29728325 | 5,21149386 |
| 7,55088661 | 7,46377595 | 7,26440085 | 6,70872674 | 7,48870482 |
| 8,38914456 | 8,46438747 | 8,16648509 | 8,02772853 | 8,33054315 |
| 3,53277098 | 3,65347924 | 3,62330938 | 3,70000301 | 3,03260914 |
| 4,58910506 | 4,18456688 | 4,19763701 | 4,36992947 | 4,34488118 |
| 7,22013134 | 7,28629047 | 7,25345035 | 7,57863544 | 7,28967061 |
| 7,51867752 | 7,31281222 | 7,36413041 | 7,57527109 | 6,59306274 |
| 7,99921517 | 7,75109294 | 7,88351062 | 7,78019366 | 8,1843784  |
| 9,01914491 | 9,0629472  | 8,96751322 | 9,17975075 | 8,71806594 |
| 4,48413401 | 4,96123555 | 4,65678116 | 5,02822229 | 5,1804849  |
| 8,87589815 | 8,35829388 | 8,61962558 | 8,360284   | 8,48748118 |
| 5,79065529 | 5,75689012 | 6,07253941 | 5,91287563 | 6,66809433 |
| 5,85796618 | 6,00538498 | 6,00189787 | 5,65181724 | 5,88021909 |
| 8,42063001 | 8,08963652 | 8,56913171 | 8,39840677 | 8,36491935 |
| 8,92817116 | 8,67891378 | 9,20487416 | 8,90874647 | 8,72026556 |
| 9,52084202 | 10,4653977 | 9,3932248  | 10,5377937 | 10,4124893 |
| 5,79931143 | 5,93842947 | 5,91363059 | 6,96078187 | 4,96391829 |
| 8,0096804  | 8,10847991 | 8,27630142 | 8,24776739 | 7,92070268 |

|            |            |            |            |            |
|------------|------------|------------|------------|------------|
| 7,51678324 | 7,93004284 | 7,47646866 | 7,92562538 | 6,83173932 |
| 3,78617058 | 4,50963442 | 3,90026911 | 4,48631341 | 4,39448394 |
| 10,6937995 | 10,8879889 | 10,5301721 | 11,0836714 | 10,3989634 |
| 5,54159567 | 5,60000121 | 5,49591526 | 5,90464732 | 4,58341453 |
| 10,9022431 | 10,8214618 | 11,0882467 | 10,9069407 | 11,0533746 |
| 9,28503042 | 9,65721023 | 9,26155274 | 9,5534515  | 9,80059076 |
| 8,00186514 | 8,06391541 | 8,49412345 | 8,10730861 | 8,33302163 |
| 7,22750967 | 7,40438911 | 6,73658005 | 6,8025755  | 7,41844239 |
| 5,11692814 | 5,27092199 | 5,2657746  | 5,07442248 | 5,4995797  |
| 6,02042408 | 6,41871149 | 6,09695587 | 6,34251847 | 5,64193615 |
| 5,85644654 | 5,65408163 | 5,65229569 | 5,87774371 | 5,41335086 |
| 6,36230318 | 6,23417579 | 6,53291219 | 6,19890957 | 6,30020397 |
| 6,35820045 | 6,51944898 | 6,47968115 | 6,70612244 | 6,10658769 |
| 10,1845528 | 10,2032646 | 10,094637  | 10,3763478 | 9,68626587 |
| 3,73619396 | 3,60437335 | 3,70260952 | 3,80129581 | 3,83396756 |
| 6,82427914 | 7,75044511 | 6,82092311 | 7,46123717 | 7,21065905 |
| 5,15885318 | 5,25012197 | 5,65383287 | 5,49087151 | 4,43683338 |
| 8,997478   | 9,32168456 | 9,16741945 | 8,8629142  | 8,87342373 |
| 7,79148611 | 8,44447341 | 7,50080844 | 7,9684873  | 7,6738992  |
| 6,00574437 | 5,57739458 | 6,09637574 | 5,95198666 | 5,3271021  |
| 6,53276138 | 6,1438055  | 6,51229801 | 7,24079872 | 5,55891141 |
| 6,26210171 | 5,96131643 | 6,42954201 | 6,41961999 | 6,08670391 |
| 6,57545585 | 6,43591327 | 7,8993276  | 5,44268737 | 6,57761897 |
| 6,27732644 | 6,84501059 | 6,80034312 | 7,01149952 | 7,26515237 |
| 6,17160244 | 5,92574377 | 6,63746111 | 6,41711443 | 5,7700544  |
| 4,86514161 | 4,60980564 | 5,13975516 | 4,49276454 | 4,57187012 |
| 7,50691341 | 7,28596139 | 7,87689358 | 7,15185398 | 7,46050063 |
| 3,0501357  | 3,44657785 | 3,68546137 | 4,17771728 | 4,00628486 |
| 5,80367156 | 6,87264332 | 7,04435712 | 6,49072121 | 6,90999207 |
| 5,58601496 | 5,771179   | 5,61870055 | 5,80832374 | 5,91915007 |
| 6,45681084 | 6,83757224 | 6,26116627 | 6,74692123 | 6,85394792 |
| 5,72888892 | 7,19332978 | 6,6610009  | 7,36181097 | 6,7327918  |
| 7,79801256 | 8,18643732 | 7,27141789 | 8,20938475 | 8,08803077 |
| 2,88239343 | 3,14491478 | 2,18541086 | 1,41399863 | 2,92038711 |
| 5,38246374 | 5,93033954 | 5,05405876 | 5,56530727 | 6,83230179 |
| 5,53764591 | 6,28157632 | 5,86136675 | 5,99649256 | 7,03670651 |
| 7,06164885 | 6,73267212 | 6,96956595 | 6,9709336  | 6,98494682 |
| 8,55643891 | 8,59144045 | 8,29823567 | 8,42115431 | 8,5467038  |
| 3,82837865 | 4,09193434 | 3,20160424 | 4,72855771 | 4,67978967 |
| 4,37956507 | 4,71781554 | 4,7713411  | 4,6856604  | 5,04185992 |
| 5,0862625  | 4,93016303 | 5,26011644 | 5,29684209 | 4,66250387 |
| 4,33574943 | 3,71855312 | 4,50271849 | 3,83507715 | 4,42433381 |
| 5,13245332 | 4,85337566 | 4,91139093 | 4,79896408 | 4,94737898 |
| 3,06102503 | 3,08788584 | 3,22068586 | 3,05498781 | 3,47190584 |
| 3,10869884 | 2,54084145 | 2,62895142 | 3,09698815 | 2,58298876 |
| 6,61489304 | 6,25202916 | 6,75689215 | 6,7715717  | 6,50275528 |
| 6,49143265 | 6,37198505 | 6,4526818  | 6,35278942 | 6,48214398 |

|            |            |            |            |            |
|------------|------------|------------|------------|------------|
| 6,50017398 | 6,14648871 | 6,64912569 | 6,92532208 | 5,98622169 |
| 5,70886163 | 5,54302383 | 6,06006283 | 6,11119805 | 5,3124418  |
| 5,89298554 | 5,94001952 | 5,90980891 | 6,15808005 | 5,96059367 |
| 6,40656766 | 6,29640803 | 6,35862241 | 6,72822078 | 5,86148111 |
| 5,50919881 | 5,35963942 | 4,56012225 | 5,64438344 | 5,35029242 |
| 3,48944905 | 4,1562132  | 3,96668897 | 4,29189464 | 4,20575728 |
| 6,5204092  | 6,84309709 | 6,52739167 | 6,92661305 | 7,02222833 |
| 4,70352276 | 4,72031968 | 5,00647572 | 5,34369056 | 4,10014263 |
| 5,21094666 | 4,95126399 | 5,13580045 | 5,62797712 | 4,87620407 |
| 6,61205071 | 7,11868373 | 6,52266006 | 6,98049386 | 6,13259037 |
| 6,97376474 | 7,5165907  | 7,16949435 | 7,3115758  | 6,42575932 |
| 4,27681256 | 4,25126269 | 4,37199238 | 4,14713449 | 4,3309465  |
| 5,99677587 | 6,03581436 | 6,07457266 | 5,98400479 | 6,1190313  |
| 9,01150095 | 9,06020117 | 8,71839625 | 9,11110387 | 8,7097408  |
| 5,37797537 | 4,83609888 | 5,05367816 | 4,95810002 | 5,33944043 |
| 5,42586719 | 5,2653015  | 5,44210132 | 5,0625597  | 5,53970296 |
| 4,96581574 | 4,79313099 | 4,84746158 | 4,98004373 | 4,59602603 |
| 6,19300189 | 5,81362656 | 6,36942233 | 5,87511147 | 6,13094754 |
| 5,0005493  | 4,82556949 | 4,98711604 | 5,09295341 | 4,55706565 |
| 7,60195967 | 7,63180551 | 7,57575572 | 7,25203092 | 7,84975826 |
| 4,68431895 | 5,38418486 | 4,82335182 | 5,52882849 | 4,73761039 |
| 7,19537661 | 6,88814536 | 7,42940755 | 7,39798051 | 6,66568035 |
| 6,00737209 | 6,6838053  | 6,04505323 | 6,44175279 | 6,25342684 |
| 6,92930607 | 6,86898039 | 6,50347867 | 6,79492002 | 6,72201948 |
| 5,29620827 | 6,55234499 | 5,89188017 | 6,16384657 | 6,68236952 |
| 4,77236518 | 4,31916229 | 4,56733975 | 4,00409936 | 4,7715588  |
| 5,08856989 | 4,87970897 | 4,60908634 | 4,50253903 | 4,68865642 |
| 4,62352719 | 5,477574   | 4,5067665  | 5,04825004 | 5,26566753 |
| 3,59276033 | 4,0474064  | 4,45193732 | 4,2740418  | 4,16328074 |
| 7,8269598  | 7,81562775 | 7,56716086 | 7,32276328 | 7,81001535 |
| 6,34478572 | 6,00182237 | 5,70053185 | 5,63408827 | 5,99447285 |
| 5,1631501  | 5,42290199 | 4,97904034 | 4,94091595 | 5,09710257 |
| 5,82990288 | 5,25756595 | 5,81340034 | 5,3395587  | 5,67498632 |
| 4,33569905 | NA         | 3,93798063 | 3,98912838 | 4,13679147 |
| 5,91216919 | 5,91958421 | 5,83164964 | 5,1815349  | 6,05887818 |
| 4,23905072 | 4,149688   | 4,54243369 | 4,20074146 | 4,69177135 |
| 5,23245786 | 5,72780985 | 4,98697008 | 5,32155217 | 6,30118473 |
| 4,63681276 | 4,5703113  | 4,02803173 | 4,30274309 | 4,74334703 |
| 5,6357406  | 6,3704025  | 5,37544035 | 5,81215194 | 6,21965011 |
| 5,05071004 | 4,77095468 | 4,55024703 | 4,22655623 | 4,82122321 |
| 4,83676321 | 4,82113685 | 4,49097908 | 4,53833694 | 4,56341313 |
| 4,21120451 | 5,02237275 | 5,16137256 | 5,01367698 | 5,40853144 |
| 5,41748127 | 4,75652236 | 5,35275229 | 4,16923376 | 5,28414846 |
| 4,72496159 | 4,74398478 | 5,05258255 | 4,74187912 | 4,73342837 |
| 5,85276059 | 5,13415152 | 4,92864531 | 4,95287466 | 5,46306175 |
| 6,44845514 | 6,61703636 | 6,50693823 | 6,08847472 | 6,6742265  |
| 8,31951346 | 8,3204599  | 7,99720313 | 7,92882114 | 8,07872106 |



|            |            |            |            |            |
|------------|------------|------------|------------|------------|
| 6,51385527 | 5,90212648 | 6,47455047 | 6,20167501 | 6,45106863 |
| 5,73302921 | 5,22326552 | 5,62999192 | 5,80785709 | 5,61157883 |
| 4,24108514 | 4,27609034 | 5,36881499 | 4,09485668 | 4,84536585 |
| 4,72204323 | 6,02494652 | 5,12835847 | 6,58050145 | 4,94969431 |
| 5,44233126 | 6,29540675 | 4,78048099 | 5,70565986 | 4,99353197 |
| 5,547502   | 5,7179011  | NA         | 5,83625007 | 5,10242945 |
| 8,62203963 | 9,32752818 | 8,33862061 | 9,25275582 | 11,5991614 |
| 8,05276875 | 8,22563353 | 8,04202591 | 8,71901377 | 8,33569076 |
| 4,57929843 | 4,65210788 | 4,65101399 | 4,77977928 | 4,43629083 |
| 5,42458022 | 5,39175822 | 5,42315734 | 5,30409426 | 5,20076707 |
| 7,47724712 | 8,16240095 | 7,67147884 | 8,23474218 | 8,26632468 |
| 3,88813351 | 3,82244914 | 4,00290766 | 3,71311298 | 3,66543865 |
| 5,02951852 | 4,42758376 | 4,55226179 | 4,07939763 | 4,4501335  |
| 5,40149992 | 4,48598713 | 4,18896733 | 4,69432276 | 5,08278848 |
| 4,85615113 | 6,7040203  | NA         | 5,5784694  | 6,32277396 |
| 4,0286442  | 4,83362193 | 3,74554502 | 4,07217061 | 3,23385624 |
| 5,77194429 | 6,29301886 | 5,90549855 | 6,48553311 | 6,45017986 |
| 5,26847381 | 6,93411522 | 5,94459851 | 6,01661345 | 7,47624224 |
| 6,47516277 | 6,37956778 | 6,39776763 | 6,45210478 | 6,43935632 |
| 4,94480009 | 4,95444128 | 4,70456373 | 4,38664038 | 4,7164499  |
| 5,09060431 | 4,93824453 | 5,39848869 | 5,10167445 | 5,05027423 |
| 4,002946   | 4,4559187  | 3,61280599 | 3,93919779 | 4,34495706 |
| 7,55031136 | 5,41566802 | 7,34677718 | 7,2962192  | 5,77949974 |
| 7,09004007 | 6,72281588 | 6,79173255 | 6,8300594  | 6,7029353  |
| NA         | 3,95547231 | 4,60392056 | 4,20985278 | 4,98121926 |
| 5,01823256 | 4,53933159 | 5,13648682 | 4,48453995 | 4,85376308 |
| 4,56827078 | 4,69720115 | 4,48515464 | 4,87854974 | 4,65732686 |
| 4,17651399 | 4,25219085 | 4,00758845 | 4,09925865 | 3,84756836 |
| 1,97343175 | 1,7240906  | NA         | 1,28754401 | 1,39054776 |
| 2,52224483 | 2,1389406  | 2,25997016 | 2,64173454 | 2,18937933 |
| 5,75362258 | 5,79687667 | 5,70798306 | 5,99406058 | 5,29671063 |
| 6,1195685  | 7,29580826 | 6,83195398 | 7,47033172 | 7,92013926 |
| 7,90880842 | 8,12441791 | 6,8841975  | 6,26180855 | 7,03158736 |
| 6,28101423 | 6,24206322 | 6,58776538 | 6,520584   | NA         |
| 5,97686766 | 5,72047087 | 5,73123371 | 5,55346778 | NA         |
| 2,9102204  | 2,98783837 | 1,88952008 | 2,14310486 | 3,13013578 |
| 4,67998813 | 4,33867227 | 4,63875726 | 4,80922758 | 4,68741576 |
| 5,06741135 | 4,78148407 | 5,27023369 | NA         | 5,18648902 |
| 7,18800469 | 7,41325814 | 7,1092823  | 8,4542408  | 6,40885862 |
| 2,77987266 | 3,3120762  | 2,61999628 | 3,18742692 | 3,22523421 |
| 4,76137143 | 4,26115831 | 4,27936023 | 3,36108489 | 3,5950235  |
| 5,61841183 | 4,47431864 | 5,92066334 | 5,04877537 | 3,93020137 |
| 3,2244484  | 2,93004065 | 3,39833728 | 3,55886242 | 3,24148138 |
| 3,71019439 | 3,20322815 | 3,6774836  | 3,65491682 | NA         |
| 4,74205861 | 4,22738852 | 4,77392953 | 4,07465848 | 4,35270835 |
| NA         | 2,87241825 | 3,31983805 | 3,08066566 | 3,23844517 |
| 4,52593904 | 7,28153813 | 4,77596093 | 6,78044736 | 6,34027791 |

|            |            |            |            |            |
|------------|------------|------------|------------|------------|
| 4,66168291 | 4,39452368 | 4,55455647 | 4,24931775 | 4,7446152  |
| 4,41096992 | 4,57253511 | 4,55555045 | 4,69625084 | 3,77054205 |
| 6,22832077 | 5,75840423 | 5,63236789 | 5,15013524 | 5,46951641 |
| 5,21866391 | 4,95675135 | 5,32723006 | 5,04405858 | 4,76544086 |
| 4,19302111 | 4,09679449 | 4,63449863 | 4,85466492 | 3,34872274 |
| 5,44103147 | 5,07140177 | 5,09066635 | 5,56712916 | 4,02201983 |
| 7,72841994 | 7,84755717 | 7,00644791 | 7,87438146 | 7,9097141  |

| Match | Exp. Mass Q-tof (Da) | Elution Time(min) | Theoretical Mass (Da) | Precursor                 | Peptide Sequence   | POLREF1    | POLREF2    |
|-------|----------------------|-------------------|-----------------------|---------------------------|--------------------|------------|------------|
|       |                      |                   |                       |                           |                    | Int (log2) | Int (log2) |
| 1     | 1243,68              | 15,35             | 1243,56               | <b>P60041 SMS_MOUSE</b>   | SANSNPAMAPRE       | 10,952     | 11,16362   |
| 2     | 620,39               | 14,74             |                       |                           |                    | 4,403572   | 4,453325   |
| 3     | 1368,70              | 15,35             |                       |                           |                    | 5,956513   | 6,157608   |
| 4     | 734,49               | 13,84             |                       |                           |                    | 6,752166   | 5,889657   |
| 5     | 1620,73              | 12,28             | 1620,60               | <b>P22005 PENK_MOUSE</b>  | SHQQESTNNDSDMS     | 4,890879   | 4,749507   |
| 6     | 762,48               | 14,75             |                       |                           |                    | 3,563398   | 3,730964   |
| 7     | 895,54               | 16,78             |                       |                           |                    | 7,063344   | 7,125192   |
| 8     | 1114,63              | 14,63             | 1114,52               | <b>P60041 SMS_MOUSE</b>   | SANSNPAMAPR        | 4,302437   | 4,441018   |
| 9     | 907,64               | 13,84             |                       |                           |                    | 10,34066   | 9,97779    |
| 11    | 767,61               | 17,95             |                       |                           |                    | 9,267362   | 8,949959   |
| 12    | 627,47               | 17,95             |                       |                           |                    | 5,543779   | 5,739015   |
| 13    | 851,59               | 35,52             |                       |                           |                    | 9,783309   | 9,804919   |
| 14    | 634,42               | 20,10             |                       |                           |                    | 5,208042   | 5,532229   |
| 15    | 598,45               | 20,10             |                       |                           |                    | 12,61864   | 12,60856   |
| 17    | 717,47               | 13,84             |                       |                           |                    | 5,174055   | 4,393368   |
| 18    | 634,42               | 21,17             |                       |                           |                    | 7,331421   | 7,232633   |
| 19    | 560,36               | 15,11             |                       |                           |                    | 4,984724   | 5,099162   |
| 20    | 1422,83              | 13,68             |                       |                           |                    | 5,170334   | 5,291744   |
| 21    | 652,03               | 7,63              |                       |                           |                    | 3,332023   | 3,572222   |
| 22    | 1631,98              | 19,03             | 1631,84               | <b>Q9R171 CBLN1_MOUSE</b> | SGSAKVAFSAIRSTNH   | 6,612618   | 6,748357   |
| 23    | 2836,51              | 19,09             |                       |                           |                    | 5,295041   | 5,56205    |
| 24    | 584,43               | 18,63             |                       |                           |                    | 6,540748   | 5,868078   |
| 25    | 712,48               | 26,76             |                       |                           |                    | 13,03179   | 13,1994    |
| 26    | 767,61               | 18,87             |                       |                           |                    | 9,43567    | 9,055216   |
| 27    | 1327,68              | 15,20             |                       |                           |                    | 6,111043   | 6,311031   |
| 28    | 1213,71              | 17,87             | 1213,59               | <b>P22005 PENK_MOUSE</b>  | SSKQDESHLLA        | 4,978804   | 4,923035   |
| 29    | 598,45               | 21,19             |                       |                           |                    | 12,8772    | 12,82529   |
| 30    | 1144,64              | 16,69             | 1144,52               | <b>P22005 PENK_MOUSE</b>  | SPQLEDEAKE         | 4,52939    | 4,648194   |
| 31    | 774,48               | 14,96             |                       |                           |                    | 4,906493   | 4,920877   |
| 32    | 1912,16              | 19,52             |                       | <b>P16014 SCG1_MOUSE</b>  | PSPKESKEADVATVRLGE | 5,717862   | 5,655294   |
| 34    | 723,58               | 18,46             |                       |                           |                    | 4,986571   | 4,710537   |
| 36    | 1837,04              | 13,95             | 1836,88               | <b>P16014 SCG1_MOUSE</b>  | GRGREPGAHSALDTREE  | 5,688327   | 6,347277   |

|    |         |       |         |                           |                       |          |          |
|----|---------|-------|---------|---------------------------|-----------------------|----------|----------|
| 38 | 600,39  | 15,57 |         |                           | 6,496994              | 6,618337 |          |
| 39 | 723,58  | 19,37 |         |                           | 6,026119              | 5,746678 |          |
| 41 | 684,45  | 20,86 |         |                           | 5,92989               | 6,070665 |          |
| 42 | 1521,92 | 18,39 | 1521,79 | <b>Q8BME9 CBLN4_MOUSE</b> | AANSKVAFS AVRSTN      | 5,8652   | 6,109721 |
| 43 | 945,53  | 22,08 | 945,44  | <b>P22005 PENK_MOUSE</b>  | YGGFM(ox)RSL          | 4,560797 | 4,970952 |
| 44 | 1361,92 | 24,05 |         |                           |                       | 6,276783 | 6,221812 |
| 45 | 1265,79 | 17,87 | 1265,67 | <b>Q8BME9 CBLN4_MOUSE</b> | SKVAFS AVRSTN         | 6,714202 | 6,830806 |
| 46 | 1378,95 | 24,04 |         |                           |                       | 7,199502 | 7,383624 |
| 47 | 995,69  | 27,31 |         |                           |                       | 12,34098 | 12,20541 |
| 49 | 2409,20 | 16,55 | 2409,00 | <b>P16014 SCG1_MOUSE</b>  | NHPDSELESTANRHGEETEEE | 6,218481 | 5,983372 |
| 50 | 1214,88 | 28,04 |         |                           |                       | 10,06817 | 9,779774 |
| 51 | 980,84  | 24,67 |         |                           |                       | 7,883776 | 7,96981  |
| 54 | 1027,64 | 18,98 | 1027,54 | <b>O35417 PDYN_MOUSE</b>  | PKLKWDNQ              | 7,6365   | 7,860075 |
| 55 | 756,52  | 27,80 |         |                           |                       | 4,326748 | 4,609632 |
| 58 | 809,62  | 20,78 |         |                           |                       | 5,759475 | 5,665076 |
| 59 | 867,63  | 20,76 |         |                           |                       | 6,142311 | 6,080057 |
| 60 | 809,62  | 19,81 |         |                           |                       | 5,26615  | 5,125324 |
| 61 | 1482,88 | 16,62 | 1482,74 | <b>Q8BGU2 CBLN2_MOUSE</b> | SGSAKVAFSATRSTN       | 4,923154 | 5,048139 |
| 63 | 764,56  | 28,49 |         |                           |                       | 4,469516 | 5,053046 |
| 65 | 927,66  | 20,51 |         |                           |                       | 3,946494 | 4,183108 |
| 66 | 1050,81 | 19,49 |         |                           |                       | 6,293489 | 6,157818 |
| 68 | 1494,91 | 20,44 | 1494,78 | <b>Q9R171 CBLN1_MOUSE</b> | SGSAKVAFSAIRSTN       | 6,216346 | 6,375781 |
| 69 | 663,18  | 8,59  |         |                           |                       | 3,725901 | 3,212506 |
| 70 | 849,62  | 23,66 |         |                           |                       | 10,32577 | 10,57164 |
| 73 | 586,38  | 39,52 |         |                           |                       | 4,267324 | 4,538331 |
| 75 | 1155,58 | 14,10 | 1155,47 | <b>P16014 SCG1_MOUSE</b>  | SEESQEREY             | 5,753391 | 5,68033  |
| 76 | 1286,81 | 20,48 |         |                           |                       | 6,531401 | 6,704262 |
| 78 | 1362,95 | 28,04 |         |                           |                       | 8,838224 | 8,757328 |
| 79 | 1050,80 | 20,16 |         |                           |                       | 7,979247 | 7,975191 |
| 81 | 698,47  | 23,86 |         |                           |                       | 9,002977 | 9,103012 |
| 83 | 640,46  | 24,05 |         |                           |                       | 8,767169 | 8,988132 |
| 87 | 1219,71 | 25,72 | 1219,60 | <b>P26339 CMGA_MOUSE</b>  | AYGFRDPGPQL           | 7,204324 | 7,406653 |
| 88 | 516,35  | 25,78 |         |                           |                       | 5,024067 | 5,383832 |
| 89 | 1259,68 | 13,40 | 1259,56 | <b>P60041 SMS_MOUSE</b>   | SANSNPAM(ox)APRE      | 5,401936 | 4,964509 |
| 91 | 844,54  | 23,86 |         |                           |                       | 8,761805 | 9,002654 |
| 92 | 581,34  | 25,94 |         |                           |                       | 9,276334 | 9,710711 |

|     |         |       |         |                           |                                                      |          |          |
|-----|---------|-------|---------|---------------------------|------------------------------------------------------|----------|----------|
| 93  | 1006,78 | 20,58 |         |                           | 5,701152                                             | 4,972789 |          |
| 95  | 1006,78 | 21,29 |         |                           | 6,016377                                             | 5,640773 |          |
| 98  | 1235,55 | 15,76 | 1235,43 | <b>P16014 SCG1_MOUSE</b>  | R.SEES(phospho)QEREY.K                               | 4,404285 | 4,777303 |
| 99  | 1198,77 | 28,30 |         |                           | 8,633711                                             | 8,425112 |          |
| 101 | 627,47  | 24,34 |         |                           | 4,7281                                               | 4,853872 |          |
| 102 | 1329,83 | 28,30 |         |                           | 6,395997                                             | 6,202894 |          |
| 103 | 899,64  | 28,68 |         |                           | 8,972978                                             | 8,666533 |          |
| 104 | 1050,81 | 20,85 |         |                           | 7,861358                                             | 7,640449 |          |
| 105 | 910,67  | 24,35 |         |                           | 4,485005                                             | 4,580619 |          |
| 106 | 1227,79 | 19,90 | 1227,68 | <b>O35417 PDYN_MOUSE</b>  | YGGFLRKYPK                                           | 8,014036 | 8,223637 |
| 107 | 1914,17 | 19,95 |         |                           | 8,535914                                             | 8,536223 |          |
| 108 | 874,56  | 22,67 |         |                           | 5,545395                                             | 6,246037 |          |
| 109 | 1169,63 | 13,56 | 1169,57 | <b>P70296 PEBP_MOUSE</b>  | AADISQWAGPL                                          | 2,936898 | 3,427215 |
| 110 | 1164,85 | 24,35 |         |                           | 9,940626                                             | 9,761415 |          |
| 111 | 1346,86 | 28,29 | 1346,73 | <b>P41539 TKN1_MOUSE</b>  | RPKPQQFFGLM(C-term amide)                            | 7,009519 | 7,104881 |
| 113 | 881,65  | 22,09 |         |                           | 10,2998                                              | 10,22627 |          |
| 114 | 931,58  | 24,91 |         |                           | 6,062729                                             | 6,337764 |          |
| 115 | 573,28  | 26,09 | 573,23  | <b>P01193 COLI_MOUSE</b>  | YGGFM                                                | 12,13756 | 12,48794 |
| 116 | 1278,75 | 25,43 | 1278,63 | <b>P21661 NEC2_MOUSE</b>  | IKMALQQEGFD                                          | 7,230588 | 7,450348 |
| 117 | 892,48  | 23,88 |         |                           | 5,377269                                             | 5,852069 |          |
| 118 | 1321,72 | 18,81 | 1321,59 | <b>P16014 SCG1_MOUSE</b>  | YPQSKWQEQE                                           | 5,914576 | 6,122365 |
| 119 | 1169,73 | 17,88 |         |                           | 5,420252                                             | 5,624002 |          |
| 120 | 881,65  | 22,82 |         |                           | 10,53912                                             | 10,40834 |          |
| 121 | 616,41  | 27,62 |         |                           | 9,435861                                             | 9,286028 |          |
| 122 | 929,53  | 26,98 | 929,44  | <b>P22005 PENK_MOUSE</b>  | YGGFMRSL                                             | 10,70781 | 10,74439 |
| 123 | 627,47  | 22,82 |         |                           | 5,248684                                             | 5,316503 |          |
| 124 | 1530,85 | 20,76 |         |                           | 7,354418                                             | 7,541785 |          |
| 125 | 1385,79 | 22,57 | 1385,67 | <b>P22005 PENK_MOUSE</b>  | SPQLEDEAKELQ                                         | 11,65285 | 11,81996 |
| 126 | 741,51  | 24,29 |         |                           | 4,74627                                              | 4,907776 |          |
| 127 | 1510,82 | 22,58 |         |                           | 6,079074                                             | 6,342522 |          |
| 128 | 1446,83 | 25,60 | 1446,72 | <b>P56942 MCH_MOUSE</b>   | EIGDEENSAKFPI(C-term amide)                          | 7,628638 | 7,836745 |
| 130 | 4933,90 | 23,07 | 4933,52 | <b>Q6ZWY8/TYB10_MOUSE</b> | Acetyl-ADKPDMGELIASFDKAKLKKTTETQEKNLPTKETIEQEKRSSEIS | 11,0385  | 9,273267 |
| 134 | 756,52  | 28,80 |         |                           | 4,807237                                             | 5,05176  |          |
| 135 | 5085,87 | 21,91 |         |                           | 9,167465                                             | 8,884517 |          |
| 136 | 4960,88 | 21,91 | 4960,49 | <b>P20065/TYB4_MOUSE</b>  | Ac-SDKPDMAEIEKFDKSKLKKTTETQEKNLPSKETIEQEKQAGES       | 14,75726 | 14,41864 |
| 137 | 4942,97 | 21,90 |         |                           | 10,53439                                             | 10,06881 |          |

|     |         |       |         |                           |                                                     |          |          |
|-----|---------|-------|---------|---------------------------|-----------------------------------------------------|----------|----------|
| 138 | 776,45  | 22,73 |         |                           |                                                     | 4,582939 | 4,906991 |
| 139 | 1448,05 | 25,26 |         |                           |                                                     | 8,808919 | 7,394668 |
| 140 | 649,41  | 19,18 |         |                           |                                                     | 7,232291 | 7,447671 |
| 142 | 655,42  | 26,33 |         |                           |                                                     | 6,289819 | 6,477124 |
| 143 | 712,49  | 29,44 |         |                           |                                                     | 6,291976 | 5,74596  |
| 144 | 4855,73 | 21,90 |         |                           |                                                     | 10,30155 | 9,80004  |
| 145 | 785,57  | 22,33 |         |                           |                                                     | 6,890623 | 6,309999 |
| 146 | 865,50  | 21,41 |         |                           |                                                     | 6,667262 | 7,172581 |
| 148 | 1334,01 | 21,97 |         |                           |                                                     | 7,256487 | 6,856333 |
| 149 | 660,37  | 17,64 |         |                           |                                                     | 3,74895  | 4,145984 |
| 150 | 1878,24 | 26,03 |         |                           |                                                     | 7,935166 | 7,883291 |
| 152 | 837,62  | 23,38 |         |                           |                                                     | 8,112864 | 7,765687 |
| 153 | 1073,63 | 18,20 | 1073,52 | <b>P22005 PENK_MOUSE</b>  | LEDEAKELQ                                           | 5,523202 | 5,718485 |
| 154 | 841,41  | 18,11 |         |                           |                                                     | 5,783074 | 6,006636 |
| 155 | 767,61  | 17,03 |         |                           |                                                     | 7,335537 | 6,738785 |
| 156 | 923,66  | 25,19 |         |                           |                                                     | 7,857313 | 8,006128 |
| 157 | 739,43  | 19,09 |         |                           |                                                     | 3,181331 | 3,469764 |
| 158 | 1591,88 | 25,57 |         |                           |                                                     | 3,536761 | 3,967384 |
| 160 | 1995,12 | 23,84 | 1995,94 | <b>P26339 CMGA_MOUSE</b>  | LEGEDDPDRSMKLSFRT                                   | 6,904276 | 7,088833 |
| 161 | 984,60  | 25,42 |         |                           |                                                     | 7,360991 | 7,298796 |
| 162 | 981,48  | 24,85 |         |                           |                                                     | 7,985729 | 8,114122 |
| 163 | 1132,69 | 25,41 | 1132,57 | <b>P41539 TKN1_MOUSE</b>  | HKTDSFVGLM(C-term amide)                            | 8,715205 | 8,657695 |
| 164 | 712,49  | 32,08 |         |                           |                                                     | 4,674177 | 5,206451 |
| 165 | 4976,87 | 20,50 | 4976,49 | <b>P20065/TYB4_MOUSE</b>  | Ac-SDKPDMAEIEKFDKSKLKKTTETQEKNPLPSKETIEQEKQAGES(ox) | 8,425665 | 8,591298 |
| 167 | 764,56  | 29,32 |         |                           |                                                     | 5,664163 | 5,833524 |
| 171 | 1653,82 | 17,28 | 1653,67 | <b>P16014 SCG1_MOUSE</b>  | HIEDS(phospho)GKPNTFNS                              | 5,930234 | 5,95031  |
| 172 | 1041,62 | 24,56 | 1041,51 | <b>P16014 SCG1_MOUSE</b>  | LLDEGHYPV                                           | 8,182284 | 8,33741  |
| 174 | 1116,70 | 27,27 | 1116,59 | <b>P16014 SCG1_MOUSE</b>  | SFARAPQLDL                                          | 8,666136 | 8,805079 |
| 175 | 1278,89 | 27,99 |         |                           |                                                     | 11,57912 | 10,37799 |
| 176 | 2509,19 | 21,28 | 2508,99 | <b>O35417 PDYN_MOUSE</b>  | SSEMARDEDGGQDGDQVGHDLY                              | 5,25497  | 5,556655 |
| 177 | 1911,10 | 24,18 | 1911,99 | <b>P16014 SCG1_MOUSE</b>  | LLDEGHYPVRESPIDTA                                   | 8,037298 | 8,221329 |
| 178 | 1844,99 | 24,11 | 1844,84 | <b>P41539 TKN1_MOUSE</b>  | ALNSVAYERSAMQNYE                                    | 7,587832 | 7,717343 |
| 180 | 741,52  | 22,19 |         |                           |                                                     | 3,733947 | 4,727174 |
| 183 | 876,48  | 28,90 | 876,40  | <b>P22005 PENK_MOUSE</b>  | YGGFMRF                                             | 11,05985 | 11,16084 |
| 187 | 1022,60 | 18,17 | 1022,50 | <b>Q9QXV0 PCSK1_MOUSE</b> | LENPSPQAPA                                          | 6,327313 | 6,058915 |
| 188 | 1678,10 | 25,91 |         |                           |                                                     | 11,36921 | 11,41686 |

|     |         |       |         |                           |                        |          |          |
|-----|---------|-------|---------|---------------------------|------------------------|----------|----------|
| 192 | 1164,85 | 23,55 |         |                           |                        | 9,841339 | 9,716047 |
| 193 | 2667,58 | 24,19 |         |                           |                        | 7,831118 | 8,021796 |
| 194 | 1120,82 | 24,79 |         |                           |                        | 7,252779 | 6,639948 |
| 198 | 642,47  | 22,66 |         |                           |                        | 3,478456 | 5,490386 |
| 199 | 1257,73 | 23,77 | 1257,61 | <b>P22005 PENK_MOUSE</b>  | SPQLEDEAKEL            | 6,139623 | 6,446108 |
| 200 | 1596,78 | 21,12 | 1596,63 | <b>P12961 7B2_MOUSE</b>   | SVPHFS(phospho)EEEKEAE | 5,363713 | 5,470211 |
| 201 | 731,41  | 18,57 |         |                           |                        | 6,315371 | 6,446824 |
| 202 | 589,28  | 20,51 | 589,22  | <b>P01193 COLI_MOUSE</b>  | YGGFM-ox               | 6,563224 | 6,917924 |
| 209 | 555,33  | 28,91 | 555,27  | <b>O35417 PDYN_MOUSE</b>  | YGGFL                  | 10,53965 | 10,72955 |
| 210 | 644,45  | 17,09 |         |                           |                        | 4,271331 | 4,406899 |
| 217 | 1206,86 | 25,91 |         |                           |                        | 6,847762 | 6,884538 |
| 218 | 633,40  | 23,82 |         |                           |                        | 5,42273  | 5,759484 |
| 220 | 1812,15 | 31,05 | 1812,00 | <b>Q9QXV0 PCSK1_MOUSE</b> | SLSAASAPLVETSTPLRL     | 8,867936 | 8,88267  |
| 221 | 1465,78 | 31,03 | 1465,64 | <b>P22005 PENK_MOUSE</b>  | VGRPEWWMYDQ            | 7,22519  | 7,362745 |
| 227 | 1737,95 | 26,73 | 1737,79 | <b>P26339 CMGA_MOUSE</b>  | LEGEDDPDRSMKLSF        | 5,265587 | 5,244602 |
| 230 | 1609,82 | 25,22 | 1609,67 | <b>O35417 PDYN_MOUSE</b>  | SQENPNTYSEDLDV         | 5,74328  | 6,077398 |
| 231 | 898,45  | 24,31 |         |                           |                        | 5,89934  | 6,377107 |
| 232 | 774,47  | 29,40 |         |                           |                        | 7,627435 | 7,890399 |
| 234 | 754,54  | 37,93 |         |                           |                        | 7,139502 | 6,663178 |
| 239 | 1157,64 | 23,71 | 1157,52 | <b>Q03517 SCG2_MOUSE</b>  | SGQLGLPDEEN            | 6,193238 | 6,220987 |
| 241 | 823,43  | 26,95 |         |                           |                        | 4,083413 | 4,527455 |
| 243 | 2056,18 | 28,71 |         |                           |                        | 6,834597 | 6,911346 |
| 249 | 869,58  | 36,36 |         |                           |                        | 4,76889  | 4,406252 |
| 257 | 1731,25 | 25,83 |         |                           |                        | 7,577975 | 7,001034 |
| 261 | 627,47  | 20,84 |         |                           |                        | 5,525249 | 5,86459  |
| 264 | 618,32  | 30,90 |         |                           |                        | 7,369486 | 7,752531 |
| 265 | 951,61  | 32,74 |         |                           |                        | 6,504984 | 6,502659 |
| 266 | 1448,05 | 25,19 |         |                           |                        | 8,89752  | 7,376541 |
| 267 | 532,94  | 8,25  |         |                           |                        | 5,187788 | 3,03985  |
| 270 | 932,47  | 30,90 |         |                           |                        | 6,686438 | 6,976527 |
| 275 | 785,57  | 23,25 |         |                           |                        | 6,728009 | 6,422295 |
| 285 | 502,35  | 24,73 |         |                           |                        | 7,394773 | 7,482903 |
| 287 | 540,31  | 24,73 |         |                           |                        | 8,966858 | 9,045221 |
| 293 | 627,47  | 22,22 |         |                           |                        | 4,359159 | 4,794905 |
| 294 | 581,38  | 33,61 |         |                           |                        | 4,602485 | 4,793769 |
| 297 | 910,47  | 22,96 |         |                           |                        | 5,048703 | 5,416012 |

|     |         |       |
|-----|---------|-------|
| 298 | 573,30  | 35,25 |
| 299 | 890,61  | 13,85 |
| 300 | 642,47  | 21,00 |
| 301 | 1154,59 | 11,53 |
| 302 | 2674,45 | 19,11 |
| 303 | 1067,68 | 13,67 |
| 304 | 2179,23 | 15,24 |
| 306 | 2023,13 | 16,68 |
| 308 | 1057,72 | 21,71 |
| 309 | 1582,92 | 16,13 |
| 313 | 712,49  | 28,37 |
| 314 | 983,60  | 20,32 |
| 315 | 2532,29 | 16,10 |
| 317 | 594,28  | 17,58 |
| 321 | 841,58  | 20,80 |
| 323 | 5040,85 | 22,38 |
| 324 | 917,62  | 22,79 |
| 325 | 564,37  | 19,02 |
| 328 | 552,27  | 17,59 |
| 331 | 566,42  | 24,13 |
| 335 | 1803,12 | 25,92 |
| 346 | 851,98  | 41,88 |
| 355 | 598,35  | 31,93 |
| 357 | 909,55  | 32,37 |
| 363 | 512,28  | 22,36 |
| 367 | 925,46  | 24,97 |
| 375 | 634,30  | 30,90 |
| 380 | 916,49  | 30,92 |
| 382 | 556,31  | 23,64 |
| 383 | 582,40  | 38,06 |
| 391 | 563,41  | 25,73 |
| 392 | 584,34  | 25,73 |
| 395 | 524,34  | 24,70 |
| 406 | 573,29  | 27,56 |
| 407 | 698,31  | 26,10 |
| 408 | 1541,92 | 20,85 |

1154,66 **P01193 COLI\_MOUSE** FKNAIIKNAH

5040,45 **P20065/TYB4\_MOUSE** Ac-SDKPDMAEIEKFDKSKLKKKTETQEKNPLPSKETIEQEKQAGES(phos)

|          |          |
|----------|----------|
| 2,871384 | 3,172704 |
| 5,316097 | 4,472816 |
| 3,29505  | 3,226219 |
| 3,214244 | 1,321389 |
| 6,259983 | 6,276664 |
| 6,730864 | 6,581182 |
| 6,302744 | 6,345822 |
| 5,704705 | 5,800865 |
| 5,700156 | 6,061994 |
| 6,442696 | 6,712156 |
| 6,86341  | 7,035848 |
| 4,683498 | 5,00571  |
| 4,640532 | 4,712683 |
| 7,484587 | 5,884772 |
| 4,035775 | 4,533696 |
| 8,068688 | 8,435317 |
| 4,360782 | 4,079295 |
| 4,948901 | 5,048835 |
| 6,084005 | 5,669844 |
| 7,753525 | 7,743691 |
| 6,341862 | 6,534271 |
| 7,180511 | 7,252953 |
| 5,076297 | 5,94158  |
| 3,325552 | 3,640268 |
| 5,039764 | 5,296303 |
| 3,70685  | 4,063259 |
| 6,048934 | 6,291321 |
| 6,702295 | 7,051888 |
| 4,767243 | 4,888265 |
| 4,80055  | 5,071507 |
| 6,86783  | 7,057523 |
| 8,329246 | 8,738683 |
| 5,985486 | 6,130442 |
| 6,546351 | 6,058794 |
| 5,515786 | 5,84376  |
| 5,095751 | 6,256866 |



|     |         |       |
|-----|---------|-------|
| 416 | 906,50  | 21,37 |
| 417 | 629,40  | 19,70 |
| 428 | 820,03  | 41,88 |
| 429 | 1937,16 | 31,07 |
| 430 | 712,49  | 29,01 |
| 431 | 834,01  | 41,89 |
| 439 | 1264,87 | 25,70 |
| 440 | 510,27  | 24,55 |
| 441 | 985,48  | 23,71 |
| 452 | 546,38  | 25,73 |
| 453 | 712,49  | 35,93 |
| 457 | 568,33  | 34,39 |
| 470 | 2170,39 | 17,42 |
| 473 | 618,41  | 27,64 |
| 476 | 703,46  | 25,85 |
| 518 | 1118,67 | 18,74 |
| 546 | 982,48  | 23,43 |
| 310 | 1165,75 | 19,20 |
| 312 | 727,50  | 23,68 |
| 316 | 1755,13 | 22,88 |
| 322 | 758,49  | 23,02 |
| 326 | 1539,77 | 17,93 |
| 330 | 1925,04 | 25,54 |
| 332 | 1580,91 | 29,53 |
| 334 | 1542,95 | 29,53 |
| 336 | 1259,84 | 26,91 |
| 348 | 510,28  | 29,99 |
| 353 | 524,31  | 27,72 |
| 361 | 628,38  | 26,67 |
| 362 | 716,43  | 28,10 |
| 364 | 590,41  | 26,68 |
| 373 | 607,44  | 26,67 |
| 374 | 712,49  | 38,51 |
| 378 | 538,33  | 30,28 |
| 381 | 568,34  | 28,45 |
| 384 | 651,47  | 27,44 |

|         |                           |                   |
|---------|---------------------------|-------------------|
| 1165,62 | <b>P12961 7B2_MOUSE</b>   | LLYEKMKGQ         |
| 1754,98 | <b>Q9QXV0 PCSK1_MOUSE</b> | LENPSPQAPARRLLPP  |
| 1924,96 | <b>Q03517 SCG2_MOUSE</b>  | ESKDQLSEDASKVITYL |
| 1542,81 | <b>Q9QXV0 PCSK1_MOUSE</b> | SLSAASAPLVETSTPL  |

|          |          |
|----------|----------|
| 4,554987 | 4,969579 |
| 5,224385 | 5,509027 |
| 6,360474 | 6,81215  |
| 3,579682 | 3,536274 |
| 5,855668 | 6,075419 |
| 7,052402 | 7,460598 |
| 6,563191 | 6,254378 |
| 4,671872 | 4,883654 |
| 4,706343 | 5,163783 |
| 6,753846 | 7,134036 |
| 3,760224 | 4,522272 |
| 3,61553  | 4,961254 |
| 5,609485 | 5,80411  |
| 7,891529 | 7,82439  |
| 5,987622 | 6,399639 |
| 4,809297 | 4,982254 |
| 2,618824 | 3,223862 |
| 5,459098 | 5,614891 |
| 4,072781 | 4,313366 |
| 7,093905 | 7,146872 |
| 6,489364 | 6,58507  |
| 4,737586 | 5,116522 |
| 4,250631 | 4,731546 |
| NA       | 5,039171 |
| NA       | 7,053162 |
| 6,502707 | NA       |
| NA       | 4,800104 |
| NA       | 5,22643  |
| NA       | 8,434974 |
| NA       | 6,466879 |
| NA       | 6,452347 |
| NA       | 6,755703 |
| NA       | 4,193143 |
| NA       | 5,359164 |
| NA       | 5,069527 |
| NA       | 5,623758 |

|     |         |       |         |                           |                          |          |          |
|-----|---------|-------|---------|---------------------------|--------------------------|----------|----------|
| 388 | 712,49  | 34,81 |         |                           |                          | 4,29835  | 4,542027 |
| 389 | 760,46  | 28,67 |         |                           |                          | NA       | 5,338589 |
| 393 | 1461,83 | 27,14 | 1461,70 | <b>P09240 CCKN_MOUSE</b>  | Pyro-Glu(Q)PVVPAEATDPVEQ | NA       | 5,866984 |
| 396 | 614,46  | 41,17 |         |                           |                          | NA       | 5,46778  |
| 409 | 712,49  | 26,32 |         |                           |                          | NA       | 10,70565 |
| 411 | 5746,05 | 21,90 |         |                           |                          | NA       | 8,2955   |
| 418 | 712,49  | 27,79 |         |                           |                          | NA       | 6,570708 |
| 422 | 894,47  | 28,10 |         |                           |                          | NA       | 3,723717 |
| 426 | 612,37  | 29,31 |         |                           |                          | NA       | 5,383749 |
| 427 | 804,49  | 29,36 |         |                           |                          | NA       | 4,871081 |
| 444 | 626,39  | 32,24 |         |                           |                          | NA       | 4,853172 |
| 448 | 1334,01 | 21,84 |         |                           |                          | 6,858346 | 6,853594 |
| 454 | 712,49  | 37,62 |         |                           |                          | NA       | 4,076864 |
| 456 | 627,47  | 20,20 |         |                           |                          | 4,590938 | 4,786218 |
| 459 | 532,94  | 9,43  |         |                           |                          | 3,581287 | 2,816513 |
| 469 | 733,37  | 16,15 |         |                           |                          | 2,127911 | NA       |
| 475 | 520,39  | 15,65 |         |                           |                          | 6,809789 | NA       |
| 494 | 1403,85 | 28,43 |         |                           |                          | 5,253979 | 5,434092 |
| 526 | 627,47  | 17,01 |         |                           |                          | 3,494221 | 3,498344 |
| 532 | 803,59  | 18,81 |         |                           |                          | 3,398139 | NA       |
| 547 | 697,45  | 16,39 |         |                           |                          | 1,235341 | 3,52242  |
| 562 | 612,41  | 36,04 |         |                           |                          | 3,624622 | 4,154535 |
| 524 | 1569,98 | 25,28 |         |                           |                          | 7,704759 | NA       |
| 551 | 612,40  | 26,68 |         |                           |                          | NA       | 5,087908 |
| 573 | 712,49  | 39,99 |         |                           |                          | NA       | 4,388824 |
| 584 | 1092,82 | 22,53 |         |                           |                          | NA       | NA       |
| 511 | 1510,83 | 16,22 | 1510,69 | <b>P60041 SMS_MOUSE</b>   | Pyro-Glu(Q)RSANSNPAMAPRE | NA       | 2,883701 |
| 514 | 1619,95 | 15,32 | 1619,80 | <b>Q8BGU2 CBLN2_MOUSE</b> | SGSAKVAFSATRSTNH         | NA       | 4,69664  |
| 542 | 1067,59 | 19,65 | 1067,49 | <b>P56388 CART_MOUSE</b>  | Pyro-Glu(Q)EDAELQPR      | 4,859739 | 4,971303 |
| 564 | 1636,86 | 33,46 |         | <b>P60041 SMS_MOUSE</b>   | AGCKNFFWKTFTSC           | 5,609125 | 5,779738 |
| 579 | 1453,94 | 28,71 | 1453,81 | <b>Q9QXV0 PCSK1_MOUSE</b> | ASAPLVETSTPLRL           | NA       | NA       |
| 632 | 2225,31 | 27,61 | 2225,12 | <b>P47867 SCG3_MOUSE</b>  | ELSAERPLNEQIAEAEADKI     | NA       | NA       |
| 642 | 1639,91 | 24,73 | 1639,77 | <b>O70176 PACA_MOUSE</b>  | GAGENLGGSVDDPAPLT        | NA       | NA       |
| 686 | 2497,30 | 27,20 | 2497,10 | <b>P22005 PENK_MOUSE</b>  | FAESLPSDEEGENYSKEVPEIE   | NA       | NA       |
| 732 | 2507,51 | 27,06 | 2507,29 | <b>P09240 CCKN_MOUSE</b>  | APSGRMSVLKLNQLSDPSHRISD  | 6,979191 | NA       |

| RAW DATA   |            |            |            |            |            | NORMALIZED DATA |            |            |            |            |            |            |            |
|------------|------------|------------|------------|------------|------------|-----------------|------------|------------|------------|------------|------------|------------|------------|
| POLREF3    | POLREF4    | POLREF5    | POLREF6    | POLREF7    | POLREF8    | POLREF1         | POLREF2    | POLREF3    | POLREF4    | POLREF5    | POLREF6    | POLREF7    | POLREF8    |
| Int (log2)      | Int (log2) | Int (log2) | Int (log2) | Int (log2) | Int (log2) | Int (log2) | Int (log2) |
| 11,12786   | 11,12304   | 10,93622   | 10,96606   | 10,88141   | 10,54138   | 10,7437336      | 11,0107856 | 10,902688  | 11,006302  | 10,9925479 | 10,7908011 | 10,8593202 | 11,1264105 |
| 4,580329   | 4,438823   | 4,415208   | 4,428468   | 4,430479   | 3,781386   | 4,41272569      | 4,37469943 | 4,53330851 | 4,49672955 | 4,67057506 | 4,68926027 | 4,73111099 | 4,30609789 |
| 6,098032   | 6,165918   | 6,010182   | 6,017659   | 6,018507   | 5,478621   | 5,91410614      | 6,06013484 | 6,00971639 | 6,17869918 | 6,21686609 | 6,17245373 | 6,23969444 | 6,01847711 |
| 6,643611   | 6,446443   | 6,086778   | 5,920336   | 5,994974   | 5,510749   | 6,68334198      | 5,7951471  | 6,54045076 | 6,45189465 | 6,29112417 | 6,08162208 | 6,21733873 | 6,05089178 |
| 4,707666   | 4,477528   | 4,288796   | 3,936414   | 3,818458   | 3,445545   | 4,88385319      | 4,66760597 | 4,65718081 | 4,53442327 | 4,5480215  | 4,2300258  | 4,14970767 | 3,96726023 |
| 3,751955   | 3,61865    | 3,683334   | 3,687263   | 3,664945   | 2,595522   | 3,60044704      | 3,66032699 | 3,72747371 | 3,69798596 | 3,96103986 | 3,99749294 | 4,00387449 | 3,10965258 |
| 7,105526   | 7,153798   | 6,997963   | 7,050127   | 6,8963     | 6,502885   | 6,98418828      | 7,01701836 | 6,98979753 | 7,14076794 | 7,17449731 | 7,1360571  | 7,07357395 | 7,05188048 |
| 4,26029    | 4,272979   | 4,117629   | 4,186297   | 4,084942   | 3,492782   | 4,31494857      | 4,36252854 | 4,22197744 | 4,33521871 | 4,38207899 | 4,46324184 | 4,40286023 | 4,01491872 |
| 10,42408   | 10,40195   | 10,28235   | 10,13858   | 10,08557   | 9,584802   | 10,1526913      | 9,8380696  | 10,2180571 | 10,3040525 | 10,3586358 | 10,0185132 | 10,1032938 | 10,161297  |
| 9,357159   | 9,539071   | 9,389977   | 9,459093   | 9,817564   | 9,005293   | 9,11502876      | 8,82160534 | 9,18016594 | 9,46371875 | 9,4935005  | 9,38434734 | 9,84869538 | 9,57661715 |
| 5,750723   | 5,665323   | 5,250164   | 5,081455   | 4,937028   | 4,455869   | 5,51507569      | 5,64617104 | 5,67185731 | 5,69118368 | 5,48004592 | 5,29869365 | 5,21231878 | 4,98659922 |
| 9,895348   | 9,90771    | 9,849524   | 9,621039   | 9,450138   | 9,392837   | 9,61384535      | 9,66711037 | 9,70371138 | 9,82272599 | 9,93902087 | 9,5354917  | 9,49965066 | 9,96761916 |
| 5,772282   | 5,443141   | 5,782665   | 6,267148   | 6,350579   | 5,949212   | 5,19048578      | 5,44167188 | 5,69282971 | 5,47480683 | 5,99629353 | 6,40530205 | 6,55515382 | 6,49326713 |
| 12,67522   | 12,64513   | 12,58559   | 12,48013   | 12,54889   | 12,2088    | 12,3550381      | 12,439746  | 12,407946  | 12,4886229 | 12,5915746 | 12,203884  | 12,4433809 | 12,8087086 |
| 5,08565    | 4,816319   | 4,451087   | 4,290069   | 4,181537   | 3,791281   | 5,15762722      | 4,31540549 | 5,02488025 | 4,86436237 | 4,70535894 | 4,56009235 | 4,49462285 | 4,31608118 |
| 7,819948   | 7,902122   | 7,846669   | 8,322911   | 8,476017   | 7,990719   | 7,24336462      | 7,12327118 | 7,68478085 | 7,8695398  | 7,99729848 | 8,32394761 | 8,57426218 | 8,55299024 |
| 5,220706   | 5,088906   | 5,137799   | 5,107263   | 4,947965   | 4,564737   | 4,97458236      | 5,01339415 | 5,15626152 | 5,12982725 | 5,37111061 | 5,32278028 | 5,22270863 | 5,09643863 |
| 5,272411   | 5,047124   | 4,9676     | 4,674502   | 4,479203   | 4,032764   | 5,15402976      | 5,20384639 | 5,20655968 | 5,08913692 | 5,20610655 | 4,91888403 | 4,77739746 | 4,55971891 |
| 3,60036    | 3,645985   | 3,777863   | 3,817601   | 3,777231   | 3,506999   | 3,37675413      | 3,50334051 | 3,58000345 | 3,72460675 | 4,05268358 | 4,11913752 | 4,11054314 | 4,02926257 |
| 6,886455   | 6,846157   | 6,469054   | 6,53265    | 6,467242   | 6,029059   | 6,54842723      | 6,64435077 | 6,77668723 | 6,84116496 | 6,66173206 | 6,65309532 | 6,6659805  | 6,57382659 |
| 5,683878   | 5,654088   | 5,055949   | 5,145443   | 4,865772   | 4,229897   | 5,27459625      | 5,47116309 | 5,60683109 | 5,68024222 | 5,29175889 | 5,35841371 | 5,14462751 | 4,7586109  |
| 6,074384   | 6,358227   | 6,148635   | 6,046143   | 6,601151   | 5,752714   | 6,47894345      | 5,77380674 | 5,98671183 | 6,36598355 | 6,35109313 | 6,19903788 | 6,79319041 | 6,2950158  |
| 13,22597   | 13,14637   | 13,03231   | 12,79708   | 12,76956   | 12,77367   | 12,7544707      | 13,0240519 | 12,9437106 | 12,9767666 | 13,0246595 | 12,4996938 | 12,6530114 | 13,3786189 |
| 9,380432   | 9,564545   | 9,407369   | 9,497162   | 9,911812   | 9,015325   | 9,27774862      | 8,92569831 | 9,20280571 | 9,48852717 | 9,51036165 | 9,41987718 | 9,93822842 | 9,58673867 |
| 6,618832   | 6,614883   | 6,61322    | 6,662577   | 6,689023   | 6,148973   | 6,06350546      | 6,21186114 | 6,51634597 | 6,61593366 | 6,80149772 | 6,77435631 | 6,87666643 | 6,69481057 |
| 4,976241   | 5,211403   | 4,813957   | 4,922808   | 4,820868   | 4,499553   | 4,96885891      | 4,83921493 | 4,91844816 | 5,24912366 | 5,05715315 | 5,15062826 | 5,10196993 | 5,03067301 |
| 12,84029   | 12,81562   | 12,72829   | 12,68713   | 12,68209   | 12,47595   | 12,6050134      | 12,6540792 | 12,5685246 | 12,6546584 | 12,7299191 | 12,3970773 | 12,5699173 | 13,0782424 |
| 4,8298     | 4,824616   | 4,439189   | 4,590422   | 4,457538   | 4,166881   | 4,5343663       | 4,56741338 | 4,77599167 | 4,87244259 | 4,6938241  | 4,84041209 | 4,7568163  | 4,69503262 |
| 4,704151   | 4,665409   | 4,579895   | 4,572601   | 4,416644   | 4,339827   | 4,89894878      | 4,83708079 | 4,65376144 | 4,71739534 | 4,83023536 | 4,82377973 | 4,71796811 | 4,86952179 |
| 5,782978   | 5,570315   | 5,811308   | 5,646868   | 5,163283   | 4,910662   | 5,6833788       | 5,56337591 | 5,70323469 | 5,59865804 | 6,02406227 | 5,82639414 | 5,42725488 | 5,44545028 |
| 4,994113   | 4,957099   | 4,917653   | 5,040832   | 5,292479   | 4,507184   | 4,97636804      | 4,62906694 | 4,93583388 | 5,00146409 | 5,15768407 | 5,26078017 | 5,54998757 | 5,0383721  |
| 6,307415   | 6,06046    | 5,993015   | 5,896975   | 5,729506   | 4,184612   | 5,65482442      | 6,24770629 | 6,2134023  | 6,07599657 | 6,20022307 | 6,05981924 | 5,96515135 | 4,71292183 |

|          |          |          |          |          |          |            |            |            |            |            |            |            |            |
|----------|----------|----------|----------|----------|----------|------------|------------|------------|------------|------------|------------|------------|------------|
| 6,562302 | 6,613142 | 6,576321 | 6,634049 | 6,619689 | 6,1455   | 6,43664216 | 6,51576865 | 6,46135409 | 6,61423815 | 6,76572498 | 6,7477311  | 6,81080101 | 6,69130658 |
| 5,809425 | 6,200153 | 6,3184   | 6,02255  | 6,529373 | 5,471072 | 5,9814011  | 5,65374929 | 5,72896209 | 6,21203969 | 6,51567643 | 6,17701851 | 6,72500326 | 6,01086075 |
| 6,132286 | 6,036248 | 6,127759 | 6,294534 | 6,331231 | 5,548631 | 5,88836708 | 5,97415334 | 6,04303838 | 6,05241718 | 6,33085432 | 6,43086143 | 6,53677375 | 6,0891118  |
| 6,101237 | 6,121338 | 5,909848 | 5,850502 | 5,693416 | 5,235253 | 5,82582491 | 6,01277742 | 6,01283419 | 6,13528396 | 6,11959456 | 6,01644595 | 5,93086683 | 5,77293756 |
| 5,24364  | 5,09488  | 4,466582 | 5,41609  | 5,216118 | 5,349354 | 4,56473053 | 4,88660202 | 5,17857151 | 5,13564516 | 4,72038099 | 5,61100882 | 5,47744669 | 5,88805667 |
| 6,35188  | 6,352219 | 5,98706  | 5,89039  | 5,682466 | 5,727848 | 6,22374258 | 6,12362881 | 6,25665745 | 6,36013252 | 6,19444984 | 6,05367345 | 5,92046462 | 6,26992793 |
| 6,930048 | 6,948552 | 6,652668 | 6,678485 | 6,569692 | 6,192259 | 6,64663845 | 6,72588797 | 6,81909411 | 6,94088459 | 6,83974166 | 6,78920326 | 6,76330522 | 6,73848281 |
| 7,461447 | 7,511574 | 7,129886 | 7,133738 | 7,007601 | 6,860508 | 7,11582558 | 7,27259238 | 7,33603429 | 7,489196   | 7,30239366 | 7,21409132 | 7,17930687 | 7,41269451 |
| 12,27814 | 12,1733  | 11,86713 | 11,57008 | 11,55585 | 11,52887 | 12,0865969 | 12,0410544 | 12,0216701 | 12,0291209 | 11,895044  | 11,3545335 | 11,5000199 | 12,1227117 |
| 6,146395 | 5,829761 | 5,439121 | 5,236474 | 4,963934 | 4,569268 | 6,16737632 | 5,88782571 | 6,05676349 | 5,85132526 | 5,66323544 | 5,44337303 | 5,23787874 | 5,10101006 |
| 9,890308 | 9,723421 | 9,280699 | 9,39195  | 9,199366 | 8,722506 | 9,88924843 | 9,64224345 | 9,69880851 | 9,64325208 | 9,38755796 | 9,32168272 | 9,26142408 | 9,29130688 |
| 7,613181 | 8,131191 | 7,916877 | 7,907254 | 7,436533 | 7,381129 | 7,7773804  | 7,85229577 | 7,48363977 | 8,09262371 | 8,06536354 | 7,93601454 | 7,58678062 | 7,93796094 |
| 7,795191 | 7,794509 | 7,504467 | 7,52901  | 7,413332 | 6,943765 | 7,53831443 | 7,74377432 | 7,66069747 | 7,76473851 | 7,66554142 | 7,58299905 | 7,5647403  | 7,4966944  |
| 4,465914 | 4,174865 | 4,18625  | 3,923237 | 3,882863 | 3,33856  | 4,3384524  | 4,52927784 | 4,42200663 | 4,23966822 | 4,44860549 | 4,2177277  | 4,21089067 | 3,85932061 |
| 6,075265 | 6,060788 | 5,997256 | 6,162233 | 6,389022 | 5,621689 | 5,72361018 | 5,57304973 | 5,98756886 | 6,076316   | 6,20433463 | 6,30738478 | 6,59167363 | 6,16282168 |
| 6,389521 | 6,448727 | 6,367907 | 6,594464 | 6,796864 | 6,138936 | 6,0937353  | 5,98344147 | 6,29327428 | 6,45411897 | 6,56367235 | 6,71078639 | 6,97911245 | 6,68468401 |
| 5,649905 | 5,58995  | 5,260115 | 5,335717 | 5,744096 | 5,193367 | 5,24666449 | 5,03926682 | 5,57378246 | 5,61778002 | 5,48969319 | 5,53599662 | 5,97901145 | 5,73067782 |
| 5,149492 | 4,987798 | 4,821583 | 4,731326 | 4,547528 | 4,085405 | 4,9150566  | 4,96293541 | 5,08698518 | 5,03136099 | 5,06454639 | 4,97191793 | 4,84230436 | 4,61282962 |
| 4,884683 | 4,866262 | 4,523016 | 4,480558 | 4,333986 | 4,011191 | 4,47648023 | 4,96778814 | 4,82938136 | 4,91300047 | 4,77509247 | 4,73787591 | 4,63944526 | 4,53795341 |
| 4,325059 | 4,130075 | 3,804366 | 3,667038 | 3,474052 | 3,235301 | 3,97082354 | 4,10747075 | 4,28498414 | 4,19604849 | 4,07837763 | 3,97861693 | 3,82253132 | 3,75514024 |
| 6,27755  | 6,512554 | 6,436991 | 6,317687 | 6,601484 | 5,800238 | 6,23989391 | 6,06034251 | 6,1843499  | 6,51627831 | 6,63064771 | 6,45247015 | 6,79350676 | 6,34296385 |
| 6,427532 | 6,161215 | 5,956663 | 6,068151 | 5,918729 | 5,668163 | 6,1653122  | 6,27589507 | 6,33025104 | 6,17411906 | 6,16498064 | 6,21957796 | 6,14490805 | 6,20971036 |
| 3,35251  | 3,863568 | 3,760844 | 3,138824 | 3,924669 | 5,35981  | 3,75755464 | 3,1476026  | 3,33889719 | 3,93650476 | 4,03618404 | 3,4856343  | 4,25060523 | 5,89860597 |
| 10,574   | 10,56432 | 10,34908 | 10,34377 | 10,26567 | 9,863328 | 10,1382956 | 10,4253522 | 10,363898  | 10,4621801 | 10,4233291 | 10,2100172 | 10,2743839 | 10,4423083 |
| 4,298392 | 3,961183 | 4,239883 | 4,375409 | 3,896781 | 4,082084 | 4,28100138 | 4,45876535 | 4,25904272 | 4,03156929 | 4,50060146 | 4,63974025 | 4,22411239 | 4,60947898 |
| 5,888099 | 5,786496 | 5,668796 | 5,621325 | 5,622313 | 5,314917 | 5,71772818 | 5,58813503 | 5,80549545 | 5,80919068 | 5,88590013 | 5,80255484 | 5,86332091 | 5,8533124  |
| 6,739981 | 6,612364 | 6,447083 | 6,393938 | 6,253808 | 5,953381 | 6,46990679 | 6,60074341 | 6,63419863 | 6,61348048 | 6,64043168 | 6,52363528 | 6,463224   | 6,49747333 |
| 8,817821 | 8,680836 | 8,255302 | 8,147316 | 7,993222 | 7,599565 | 8,70013894 | 8,63110464 | 8,65550277 | 8,62790764 | 8,39345889 | 8,16006463 | 8,11562004 | 8,15834602 |
| 8,154978 | 8,291369 | 8,022564 | 8,297769 | 8,552817 | 7,615781 | 7,86968159 | 7,85761726 | 8,01069504 | 8,24861659 | 8,16782469 | 8,30048256 | 8,64722009 | 8,17470671 |
| 9,03379  | 8,949273 | 8,656837 | 8,552122 | 8,598277 | 8,510042 | 8,85942183 | 8,97296573 | 8,86559548 | 8,88933094 | 8,78273794 | 8,53787045 | 8,69040586 | 9,07694709 |
| 8,994595 | 9,083177 | 8,744891 | 8,720127 | 8,72115  | 8,47166  | 8,6314431  | 8,85935619 | 8,82746693 | 9,01973631 | 8,86810429 | 8,69466968 | 8,80713187 | 9,03822261 |
| 7,477561 | 7,394177 | 7,212352 | 7,414844 | 7,23141  | 6,7371   | 7,12048748 | 7,2953667  | 7,35170985 | 7,37486634 | 7,38234257 | 7,47644782 | 7,39191934 | 7,28818535 |
| 5,290869 | 5,192402 | 5,141002 | 5,315394 | 5,219787 | 4,742779 | 5,0126191  | 5,29491599 | 5,22451546 | 5,23061911 | 5,37421584 | 5,51702914 | 5,48093214 | 5,27606928 |
| 5,045135 | 5,153511 | 4,927746 | 4,692372 | 4,860555 | 4,115492 | 5,37794214 | 4,88023027 | 4,98546763 | 5,19274425 | 5,167469   | 4,93556212 | 5,1396715  | 4,64318508 |
| 8,921271 | 8,78428  | 8,587077 | 8,607905 | 8,321074 | 7,99725  | 8,6262572  | 8,87371759 | 8,756138   | 8,72864886 | 8,7151072  | 8,58993278 | 8,42707054 | 8,55957951 |
| 9,657613 | 9,675775 | 9,584334 | 9,81355  | 9,700245 | 9,080119 | 9,12370287 | 9,57394422 | 9,4724449  | 9,59685097 | 9,68192519 | 9,7151624  | 9,73724552 | 9,65211082 |

|          |          |          |          |          |          |            |            |            |            |            |            |            |            |
|----------|----------|----------|----------|----------|----------|------------|------------|------------|------------|------------|------------|------------|------------|
| 5,506413 | 4,975854 | 5,582579 | 5,587882 | 6,144221 | 4,793149 | 5,66722361 | 4,8884187  | 5,43419473 | 5,01972906 | 5,8023147  | 5,77134245 | 6,35911933 | 5,32688873 |
| 6,055487 | 6,103201 | 5,945632 | 5,969898 | 6,293987 | 5,320414 | 5,97198255 | 5,54901549 | 5,968329   | 6,11762084 | 6,15428633 | 6,12787835 | 6,50139296 | 5,85885844 |
| 4,767066 | 4,753123 | 4,801881 | 4,533967 | 4,459112 | 4,095352 | 4,41341502 | 4,69509457 | 4,71496459 | 4,80281755 | 5,04544574 | 4,78772258 | 4,75831156 | 4,62286537 |
| 8,598855 | 8,339074 | 7,883649 | 7,99535  | 7,838829 | 7,217851 | 8,50241616 | 8,3025626  | 8,44249461 | 8,29507516 | 8,03314975 | 8,01823462 | 7,96895089 | 7,77322603 |
| 5,047733 | 4,635432 | 3,800854 | 3,583212 | 3,534781 | 3,463144 | 4,72647876 | 4,7708168  | 4,98799494 | 4,68820157 | 4,07497283 | 3,90038204 | 3,88022222 | 3,98501626 |
| 6,377759 | 6,197833 | 5,922082 | 6,13915  | 5,841879 | 5,092922 | 6,33899845 | 6,10492002 | 6,28183231 | 6,20978031 | 6,13145514 | 6,2858414  | 6,07190264 | 5,62933656 |
| 8,453587 | 7,947848 | 8,306142 | 7,743865 | 7,265786 | 6,52412  | 8,83041886 | 8,54131374 | 8,3011792  | 7,91407108 | 8,44274711 | 7,78352343 | 7,42457561 | 7,07330496 |
| 8,043324 | 8,087918 | 7,952968 | 8,011992 | 8,358179 | 7,750826 | 7,75570672 | 7,52657716 | 7,90207903 | 8,05048134 | 8,10035295 | 8,03376661 | 8,46231928 | 8,3109567  |
| 4,728842 | 4,533491 | 3,68472  | 3,658881 | 3,257107 | 2,965938 | 4,49145497 | 4,50058569 | 4,67778063 | 4,58892408 | 3,96238355 | 3,97100399 | 3,61643947 | 3,48337375 |
| 8,229657 | 8,110148 | 7,804907 | 7,720922 | 7,544798 | 7,15637  | 7,90331553 | 8,10331571 | 8,0833421  | 8,07213052 | 7,95681117 | 7,7621107  | 7,68962943 | 7,71119645 |
| 8,486344 | 8,419331 | 8,396132 | 8,416833 | 8,291209 | 7,641599 | 8,4078662  | 8,41244483 | 8,33304491 | 8,37323522 | 8,52999037 | 8,4116051  | 8,3986996  | 8,20075508 |
| 6,305294 | 6,10153  | 5,737138 | 5,976923 | 5,819366 | 5,764588 | 5,51663803 | 6,1475859  | 6,21133901 | 6,1159935  | 5,95215614 | 6,13443479 | 6,0505159  | 6,30699575 |
| 3,329897 | 3,094484 | 3,294505 | 2,755455 | 2,458109 | 2,539295 | 2,99474802 | 3,35993714 | 3,31689946 | 3,18751532 | 3,58407898 | 3,12783565 | 2,85741307 | 3,05292387 |
| 9,948761 | 9,986323 | 9,469923 | 9,506323 | 9,637428 | 9,298109 | 9,76593913 | 9,62408748 | 9,75567107 | 9,899285   | 9,57100633 | 9,42842715 | 9,67757107 | 9,87204591 |
| 7,038066 | 6,798629 | 6,480743 | 6,177304 | 6,110534 | 5,766219 | 6,93215037 | 6,99693198 | 6,92417305 | 6,79487876 | 6,67306428 | 6,32145056 | 6,32711759 | 6,30864131 |
| 10,34691 | 10,37127 | 10,3144  | 10,57587 | 10,58646 | 9,989391 | 10,1131879 | 10,0838017 | 10,1429868 | 10,2741741 | 10,3897076 | 10,4266364 | 10,5791257 | 10,5694961 |
| 6,269892 | 6,239635 | 5,986713 | 5,984751 | 5,683259 | 5,345635 | 6,01679557 | 6,2382985  | 6,17690026 | 6,25049011 | 6,19411343 | 6,14174067 | 5,92121795 | 5,88430449 |
| 12,45837 | 12,42338 | 12,3634  | 12,56575 | 12,47517 | 11,91737 | 11,8899308 | 12,32046   | 12,1969962 | 12,2726668 | 12,3761665 | 12,2837933 | 12,3733489 | 12,5146782 |
| 7,595123 | 7,450621 | 7,130117 | 7,346668 | 7,220814 | 6,841051 | 7,14587947 | 7,33857848 | 7,46607311 | 7,42983558 | 7,30261761 | 7,41281909 | 7,38185343 | 7,3930639  |
| 6,11469  | 6,028968 | 5,492706 | 6,027824 | 5,821227 | 5,916326 | 5,35409413 | 5,75797478 | 6,02592115 | 6,04532739 | 5,71518487 | 6,18194074 | 6,0522838  | 6,46008769 |
| 6,013801 | 5,933954 | 5,734996 | 5,833195 | 5,653366 | 5,308619 | 5,87356153 | 6,02528159 | 5,92777723 | 5,95279591 | 5,95007952 | 6,00029331 | 5,89282041 | 5,8469582  |
| 5,423255 | 5,445601 | 5,338964 | 5,16759  | 5,094814 | 4,521609 | 5,39565001 | 5,53242996 | 5,35329937 | 5,47720255 | 5,5661355  | 5,37908353 | 5,36221119 | 5,05292581 |
| 10,55024 | 10,5722  | 10,32435 | 10,34576 | 10,62275 | 10,08568 | 10,344562  | 10,2638582 | 10,3407845 | 10,4698543 | 10,3993539 | 10,2118745 | 10,6136002 | 10,6666443 |
| 9,007176 | 8,656527 | 9,127994 | 8,920135 | 8,751249 | 7,905135 | 9,27793327 | 9,15395777 | 8,83970562 | 8,60423378 | 9,23951394 | 8,88133733 | 8,8357251  | 8,46664258 |
| 10,75732 | 10,76261 | 10,56867 | 10,90576 | 10,76372 | 10,21101 | 10,5076512 | 10,5961918 | 10,54223   | 10,6552892 | 10,6362166 | 10,734523  | 10,7475179 | 10,7930926 |
| 5,244265 | 5,087877 | 4,497439 | 4,558278 | 4,378213 | 4,15523  | 5,22977839 | 5,22833158 | 5,17917951 | 5,12882513 | 4,75029615 | 4,81041206 | 4,68145971 | 4,68327765 |
| 7,560595 | 7,299208 | 7,104147 | 7,007086 | 6,706199 | 6,506403 | 7,26559808 | 7,42900428 | 7,43248458 | 7,28237868 | 7,27744029 | 7,09588689 | 6,89298316 | 7,05542987 |
| 11,85984 | 11,84057 | 11,63956 | 11,73076 | 11,55672 | 11,30512 | 11,4213141 | 11,6598671 | 11,6147516 | 11,7050844 | 11,6744201 | 11,5044963 | 11,5008463 | 11,8969652 |
| 5,161639 | 4,818991 | 4,124029 | 3,743257 | 3,648921 | 3,316462 | 4,74404548 | 4,82412468 | 5,09880167 | 4,86696456 | 4,38828364 | 4,04975219 | 3,98865212 | 3,83702543 |
| 6,330359 | 6,36958  | 6,111386 | 6,052625 | 5,976254 | 5,627498 | 6,03259789 | 6,24300388 | 6,23572202 | 6,37703992 | 6,31498107 | 6,20508753 | 6,19955524 | 6,16868252 |
| 7,885653 | 7,809453 | 7,589649 | 7,786508 | 7,596349 | 7,246495 | 7,53071346 | 7,72070233 | 7,74869809 | 7,77929205 | 7,74812344 | 7,82332218 | 7,73860148 | 7,80212562 |
| 9,751885 | 8,941493 | 7,457423 | 9,188672 | 8,299484 | 6,497522 | 10,8273617 | 9,14133789 | 9,56415186 | 8,88175422 | 7,61993334 | 9,13196317 | 8,40656062 | 7,04646963 |
| 5,082791 | 4,716779 | 4,646563 | 4,330464 | 4,271185 | 3,984694 | 4,80298826 | 4,96651636 | 5,02209904 | 4,76742315 | 4,89486847 | 4,59779304 | 4,57978602 | 4,51121998 |
| 8,995981 | 8,619017 | 7,90799  | 8,415062 | 7,984002 | 7,501131 | 9,01844852 | 8,75688706 | 8,82881522 | 8,56770384 | 8,0567478  | 8,40995222 | 8,1068613  | 8,05903371 |
| 14,62741 | 14,27302 | 13,58028 | 13,99143 | 13,75014 | 13,25107 | 14,4226519 | 14,2298084 | 14,3070189 | 14,0739796 | 13,555904  | 13,6143818 | 13,5845357 | 13,8602787 |
| 10,2752  | 9,875698 | 9,089515 | 9,565404 | 9,277473 | 8,76662  | 10,3399891 | 9,92808301 | 10,073228  | 9,7915504  | 9,20220942 | 9,4835675  | 9,3356236  | 9,3358145  |

|          |          |          |          |          |          |            |            |            |            |            |            |            |            |
|----------|----------|----------|----------|----------|----------|------------|------------|------------|------------|------------|------------|------------|------------|
| 4,910349 | 4,86322  | 4,817125 | 4,732475 | 4,654803 | 4,34356  | 4,58613737 | 4,82334836 | 4,85434901 | 4,91003795 | 5,06022446 | 4,97299029 | 4,94421269 | 4,8732881  |
| 7,542796 | 6,946396 | 6,2012   | 6,332049 | 6,615513 | 5,617417 | 8,67180692 | 7,28351424 | 7,41516987 | 6,93878492 | 6,4020537  | 6,46587422 | 6,80683392 | 6,15851156 |
| 7,445457 | 7,417624 | 7,315691 | 7,309659 | 7,146502 | 6,849142 | 7,14752593 | 7,33593108 | 7,32047936 | 7,39770072 | 7,48252738 | 7,37827856 | 7,31125905 | 7,40122709 |
| 6,649431 | 6,547634 | 6,55327  | 6,630685 | 6,596396 | 6,148208 | 6,23634576 | 6,37611732 | 6,5461124  | 6,55044174 | 6,74337756 | 6,74459148 | 6,78867329 | 6,69403875 |
| 6,178044 | 5,613995 | 5,700214 | 5,578712 | 5,438916 | 5,408399 | 6,23843114 | 5,65303924 | 6,08755135 | 5,64119677 | 5,91635916 | 5,76278408 | 5,68909874 | 5,94762852 |
| 9,978246 | 9,562365 | 8,740831 | 9,239351 | 8,985554 | 8,842883 | 10,1148798 | 9,66228533 | 9,78435381 | 9,48640413 | 8,86416821 | 9,17926193 | 9,05830848 | 9,41275799 |
| 5,894401 | 5,519455 | 6,382653 | 6,068665 | 5,896512 | 4,864316 | 6,81720194 | 6,21084055 | 5,81162598 | 5,5491269  | 6,57796826 | 6,22005768 | 6,12380251 | 5,39869074 |
| 7,111457 | 7,008251 | 6,974194 | 6,987642 | 6,830978 | 6,494772 | 6,60125695 | 7,06388329 | 6,99556716 | 6,99902378 | 7,15145381 | 7,07773979 | 7,01151982 | 7,04369509 |
| 7,086521 | 7,344768 | 6,873524 | 7,123571 | 5,256809 | 6,558455 | 7,17091857 | 6,75113267 | 6,97130964 | 7,3267483  | 7,05385653 | 7,20460245 | 5,51610204 | 7,10794633 |
| 3,980511 | 3,985521 | 3,892564 | 3,684762 | 3,627861 | 3,357544 | 3,77983837 | 4,0707573  | 3,94981094 | 4,05527139 | 4,16388359 | 3,99515875 | 3,96864569 | 3,878474   |
| 7,890169 | 7,701253 | 7,095055 | 7,218259 | 6,774136 | 6,706112 | 7,82706416 | 7,76673358 | 7,75309121 | 7,67391909 | 7,2686258  | 7,29297485 | 6,95752147 | 7,25692085 |
| 7,909307 | 8,047606 | 7,956966 | 7,742179 | 8,165936 | 7,324556 | 7,99886225 | 7,65043016 | 7,77170849 | 8,01122261 | 8,10422892 | 7,78194988 | 8,27969365 | 7,88088315 |
| 5,770082 | 5,729905 | 5,563417 | 5,477764 | 5,395016 | 5,063584 | 5,49518188 | 5,62586808 | 5,69068957 | 5,75407828 | 5,78373758 | 5,66856922 | 5,64739493 | 5,59973678 |
| 6,063076 | 6,010294 | 5,790782 | 5,920496 | 5,858465 | 5,306907 | 5,74642564 | 5,91083243 | 5,97571151 | 6,02714131 | 6,00416278 | 6,08177141 | 6,08765889 | 5,84523092 |
| 7,282392 | 7,343867 | 7,331526 | 7,383803 | 7,656986 | 6,862313 | 7,24734397 | 6,63488462 | 7,16185119 | 7,32587084 | 7,49787906 | 7,44747722 | 7,79620498 | 7,41451561 |
| 8,186706 | 8,246456 | 7,730182 | 7,875018 | 7,978737 | 7,631674 | 7,75179602 | 7,88821213 | 8,04155975 | 8,20487708 | 7,88436698 | 7,90592865 | 8,10185969 | 8,19074153 |
| 3,795503 | 3,737426 | 3,371846 | 3,41334  | 3,466024 | 2,691411 | 3,23106538 | 3,40201559 | 3,76983681 | 3,81365859 | 3,65905933 | 3,74184034 | 3,81490494 | 3,20639718 |
| 3,974974 | 4,026155 | 3,601474 | 3,49046  | 3,504604 | 3,078627 | 3,57469444 | 3,89413243 | 3,94442459 | 4,0948437  | 3,88167845 | 3,81381651 | 3,85155489 | 3,59706826 |
| 7,216566 | 7,061595 | 6,485999 | 6,653077 | 6,519936 | 6,035546 | 6,83040164 | 6,98106146 | 7,09781625 | 7,05097401 | 6,67815985 | 6,76548995 | 6,71603837 | 6,58037148 |
| 7,370825 | 7,163795 | 6,848622 | 6,986353 | 6,993411 | 6,369298 | 7,27195284 | 7,18870249 | 7,24787802 | 7,15050374 | 7,02971461 | 7,07653676 | 7,16582676 | 6,9171015  |
| 8,07185  | 8,101848 | 7,853419 | 7,827448 | 7,86245  | 7,665105 | 7,87594837 | 7,99501183 | 7,92982886 | 8,06404738 | 8,00384245 | 7,86153152 | 7,9913902  | 8,22447083 |
| 9,230933 | 9,112711 | 8,779932 | 8,895046 | 8,620469 | 8,25705  | 8,5812044  | 8,53257348 | 9,05737442 | 9,04849865 | 8,90207574 | 8,85792175 | 8,71148765 | 8,82169768 |
| 5,005477 | 4,705907 | 4,630069 | 4,620655 | 4,110776 | 4,218082 | 4,6743461  | 5,11949664 | 4,94688868 | 4,75683521 | 4,87887792 | 4,86862858 | 4,42740182 | 4,74669048 |
| 9,16959  | 8,876084 | 8,209743 | 8,89411  | 8,554692 | 8,819945 | 8,30127767 | 8,46691076 | 8,9977005  | 8,81805422 | 8,34929047 | 8,85704818 | 8,64900129 | 9,38961532 |
| 5,907805 | 5,897264 | 5,818037 | 5,691204 | 5,446677 | 5,178158 | 5,63146271 | 5,73963487 | 5,82466527 | 5,91706454 | 6,03058588 | 5,86777297 | 5,69647148 | 5,71533311 |
| 6,344258 | 6,05622  | 6,043273 | 5,901415 | 5,874832 | 6,019295 | 5,88869966 | 5,85512934 | 6,24924284 | 6,07186736 | 6,24894706 | 6,0639631  | 6,1032071  | 6,56397547 |
| 8,38823  | 8,418422 | 8,30413  | 8,462292 | 8,167933 | 7,852537 | 8,06597738 | 8,2158305  | 8,23760049 | 8,37234997 | 8,44079652 | 8,45403203 | 8,28159075 | 8,41357526 |
| 8,923802 | 8,798334 | 8,62714  | 8,89113  | 8,772229 | 8,219821 | 8,53376459 | 8,67832756 | 8,75860014 | 8,74233566 | 8,75394737 | 8,85426694 | 8,85565553 | 8,78413649 |
| 10,39816 | 9,93329  | 9,346175 | 8,864878 | 8,666137 | 8,293611 | 11,3500321 | 10,2338438 | 10,1928424 | 9,84763764 | 9,45103546 | 8,82976592 | 8,75487101 | 8,85858491 |
| 5,725325 | 5,442721 | 5,208267 | 5,25831  | 5,194851 | 4,553792 | 5,23585569 | 5,46582775 | 5,64715036 | 5,4743978  | 5,43942773 | 5,46375259 | 5,45724362 | 5,08539597 |
| 8,292882 | 8,211108 | 7,947043 | 8,034574 | 7,877416 | 7,578053 | 7,92580519 | 8,10103323 | 8,14484681 | 8,17045265 | 8,09460879 | 8,05484241 | 8,00560749 | 8,13664207 |
| 7,73678  | 7,720868 | 7,423797 | 7,544073 | 7,363297 | 7,07608  | 7,4912623  | 7,60262079 | 7,60387577 | 7,69302159 | 7,58733369 | 7,59705737 | 7,51720841 | 7,63019003 |
| 4,507792 | 4,293584 | 4,006562 | 3,732705 | 3,665962 | 3,424552 | 3,7653335  | 4,64551995 | 4,46274517 | 4,35528534 | 4,27440206 | 4,039904   | 4,00484061 | 3,94607991 |
| 11,31171 | 11,20714 | 11,05743 | 11,22221 | 11,07344 | 10,53466 | 10,8480028 | 11,0080363 | 11,0815356 | 11,0882046 | 11,1100583 | 11,0298661 | 11,0417435 | 11,1196305 |
| 6,098844 | 6,101158 | 5,896648 | 5,998605 | 5,883301 | 5,555114 | 6,27259489 | 5,96253328 | 6,0105063  | 6,11563122 | 6,10679746 | 6,15467062 | 6,11125242 | 6,09565264 |
| 11,47543 | 11,36118 | 10,98713 | 11,09705 | 10,90337 | 10,54745 | 11,1470915 | 11,261225  | 11,240801  | 11,2382199 | 11,041904  | 10,9130542 | 10,8801816 | 11,1325346 |

|          |          |          |          |          |          |            |            |            |            |            |            |            |            |
|----------|----------|----------|----------|----------|----------|------------|------------|------------|------------|------------|------------|------------|------------|
| 9,810248 | 9,713437 | 9,355098 | 9,315976 | 9,310178 | 9,040582 | 9,66994865 | 9,57922121 | 9,62092686 | 9,63352894 | 9,4596861  | 9,25077611 | 9,36669247 | 9,61222103 |
| 8,142261 | 8,008213 | 7,727571 | 7,783167 | 7,617767 | 7,345521 | 7,72647075 | 7,90370686 | 7,99832405 | 7,97285887 | 7,88183568 | 7,82020402 | 7,758948   | 7,90203522 |
| 6,975809 | 6,898384 | 6,370618 | 6,323393 | 6,494947 | 6,036917 | 7,16733369 | 6,53714066 | 6,86361    | 6,89202738 | 6,5663006  | 6,45779556 | 6,6922995  | 6,58175471 |
| 5,503296 | 5,188584 | 3,192157 | 5,015409 | 4,759599 | 4,627059 | 3,51832528 | 5,40029162 | 5,43116254 | 5,22690087 | 3,48485493 | 5,23705286 | 5,04376605 | 5,15931673 |
| 6,455296 | 6,445639 | 6,064096 | 6,250516 | 6,082139 | 5,635361 | 6,09113655 | 6,34544433 | 6,35725961 | 6,45111165 | 6,26913449 | 6,38977939 | 6,30014312 | 6,17661568 |
| 5,478049 | 5,278124 | 5,016325 | 5,272514 | 5,180726 | 4,705378 | 5,34098822 | 5,38033973 | 5,40660249 | 5,31410138 | 5,25334433 | 5,4770092  | 5,44382526 | 5,23833456 |
| 6,533598 | 6,5347   | 6,410006 | 6,428163 | 6,313402 | 6,009793 | 6,26104939 | 6,34615241 | 6,4334311  | 6,53784568 | 6,60448637 | 6,55557751 | 6,51983668 | 6,55438869 |
| 7,150607 | 7,108658 | 6,78468  | 7,192039 | 6,948902 | 6,228749 | 6,5006732  | 6,81204253 | 7,03365193 | 7,09680736 | 6,96772429 | 7,2685037  | 7,12354442 | 6,7752984  |
| 10,78226 | 10,76253 | 10,7697  | 10,91582 | 10,77765 | 10,26916 | 10,3450744 | 10,5815159 | 10,5664914 | 10,6552113 | 10,8311106 | 10,743912  | 10,760751  | 10,8517615 |
| 4,327015 | 4,390467 | 3,896297 | 3,810814 | 3,7222   | 3,661904 | 4,28487534 | 4,32878686 | 4,28688692 | 4,44963699 | 4,16750265 | 4,1128032  | 4,05826518 | 4,18554977 |
| 7,329862 | 7,034422 | 5,699515 | 5,609176 | 5,167818 | 5,551311 | 6,77576401 | 6,77902575 | 7,20802958 | 7,02451099 | 5,9156815  | 5,79121616 | 5,43156301 | 6,09181571 |
| 5,613459 | 5,574382 | 5,511282 | 5,594875 | 5,441469 | 4,931342 | 5,39804574 | 5,66641367 | 5,53832812 | 5,60261877 | 5,73319388 | 5,77786903 | 5,69152402 | 5,4663148  |
| 9,107084 | 9,433508 | 9,086345 | 9,207135 | 8,61176  | 8,184072 | 8,72886445 | 8,75506049 | 8,93689522 | 9,36091389 | 9,19913618 | 9,1491947  | 8,70321434 | 8,7480685  |
| 7,667592 | 7,690093 | 7,325168 | 7,51418  | 7,142924 | 6,731964 | 7,14066069 | 7,25194428 | 7,5365703  | 7,66305068 | 7,49171512 | 7,5691582  | 7,30786005 | 7,28300353 |
| 5,422881 | 5,289726 | 4,880322 | 5,366171 | 5,235009 | 4,513661 | 5,24612018 | 5,15722573 | 5,35293555 | 5,32540024 | 5,12149251 | 5,56441937 | 5,49539263 | 5,04490689 |
| 6,235284 | 6,162459 | 5,754463 | 6,004946 | 5,912538 | 5,592377 | 5,70795288 | 5,98081188 | 6,14323391 | 6,17533055 | 5,96895233 | 6,16058868 | 6,13902677 | 6,13324814 |
| 6,318821 | 6,220873 | 6,159937 | 6,115521 | 5,946844 | 5,662959 | 5,8588314  | 6,27720641 | 6,22449796 | 6,23221832 | 6,36205016 | 6,26378843 | 6,17161654 | 6,20445993 |
| 7,847312 | 7,994315 | 7,983891 | 8,038651 | 7,805234 | 7,259505 | 7,52955041 | 7,77376297 | 7,71140031 | 7,95932399 | 8,13033209 | 8,05864748 | 7,93703655 | 7,81525171 |
| 6,774879 | 6,71763  | 6,361412 | 6,164358 | 5,946015 | 5,75291  | 7,05781769 | 6,56011376 | 6,66814709 | 6,7159961  | 6,55737559 | 6,30936805 | 6,17082901 | 6,29521355 |
| 6,319216 | 6,244042 | 6,08287  | 6,202883 | 6,124483 | 5,686835 | 6,14297143 | 6,12281293 | 6,22488221 | 6,25478196 | 6,28733545 | 6,34532347 | 6,34036876 | 6,22854897 |
| 4,472666 | 4,511416 | 4,431204 | 4,647432 | 4,489527 | 3,631957 | 4,10319657 | 4,44800963 | 4,42857491 | 4,56742585 | 4,68608282 | 4,89361958 | 4,78720498 | 4,15533556 |
| 7,143992 | 6,952794 | 6,459365 | 6,762113 | 6,591582 | 5,602799 | 6,76303611 | 6,80553728 | 7,02721691 | 6,94501576 | 6,6523388  | 6,86725336 | 6,78410012 | 6,14376313 |
| 4,267749 | 4,243852 | 3,804212 | 3,561431 | 3,190287 | 2,992888 | 4,76591445 | 4,32814701 | 4,22923349 | 4,30685274 | 4,07822833 | 3,88005381 | 3,55296228 | 3,51056422 |
| 7,374427 | 6,764771 | 6,886852 | 6,448416 | 5,566374 | 5,103635 | 7,48173257 | 6,89423342 | 7,25138202 | 6,7619054  | 7,06677772 | 6,57447965 | 5,81018038 | 5,64014515 |
| 5,983873 | 5,723256 | 5,302706 | 5,219488 | 3,898191 | 4,717499 | 5,49716092 | 5,77035731 | 5,89866354 | 5,74760301 | 5,53098419 | 5,42751998 | 4,22545185 | 5,25056371 |
| 7,496615 | 7,281156 | 7,25284  | 6,551309 | 6,612231 | 6,784919 | 7,28016579 | 7,63741965 | 7,37024541 | 7,26479834 | 7,42159477 | 6,67050978 | 6,80371611 | 7,33643104 |
| 7,043173 | 6,976476 | 6,599389 | 6,331972 | 6,080491 | 5,966439 | 6,44436688 | 6,40136993 | 6,92914109 | 6,968079   | 6,78808888 | 6,46580235 | 6,29857756 | 6,51064784 |
| 7,615107 | 6,946022 | 6,762714 | 6,262953 | 6,290247 | 6,604199 | 8,7574662  | 7,26558771 | 7,48551336 | 6,93842069 | 6,94642876 | 6,40138686 | 6,49784006 | 7,1540985  |
| 3,395984 | 3,299133 | 1,613462 | 2,17185  | 2,802165 | 3,509064 | 5,17090425 | 2,97685599 | 3,38118831 | 3,38681727 | 1,95434602 | 2,58315655 | 3,18425693 | 4,031346   |
| 6,697219 | 6,506326 | 6,337593 | 5,563759 | 5,608273 | 5,820258 | 6,61979627 | 6,86999744 | 6,59260014 | 6,51021303 | 6,53428361 | 5,74882843 | 5,84998329 | 6,36316249 |
| 6,270987 | 5,876048 | 6,377705 | 6,132476 | 5,999519 | 4,856853 | 6,65998703 | 6,32189467 | 6,17796547 | 5,89640287 | 6,57317128 | 6,27961255 | 6,22165636 | 5,39116115 |
| 7,603944 | 7,202125 | 7,141252 | 7,367345 | 7,439794 | 6,919603 | 7,30461322 | 7,37077345 | 7,4746541  | 7,18783226 | 7,31341274 | 7,43211696 | 7,58987848 | 7,47231681 |
| 9,049072 | 8,699351 | 8,633898 | 8,828791 | 8,801768 | 8,399471 | 8,82450205 | 8,91581384 | 8,88046167 | 8,64593888 | 8,7604991  | 8,79608589 | 8,88371678 | 8,96538948 |
| 4,46017  | 4,343262 | 3,886781 | 3,739236 | 3,77807  | 3,754858 | 4,36978729 | 4,71250191 | 4,41641891 | 4,40366536 | 4,1582771  | 4,04599939 | 4,11134016 | 4,27933319 |
| 4,835651 | 4,696497 | 4,428554 | 4,411572 | 4,062901 | 4,330037 | 4,60503441 | 4,71137848 | 4,78168347 | 4,74767107 | 4,68351371 | 4,67349121 | 4,38192187 | 4,85964444 |
| 5,352441 | 5,319872 | 5,212247 | 5,155265 | 5,022435 | 4,776278 | 5,03643714 | 5,32674012 | 5,28441215 | 5,35475859 | 5,44328625 | 5,3675806  | 5,29345311 | 5,30986719 |

|          |          |          |          |          |          |            |            |            |            |            |            |            |            |
|----------|----------|----------|----------|----------|----------|------------|------------|------------|------------|------------|------------|------------|------------|
| 3,493798 | 3,10293  | 2,868181 | 3,177605 | 4,086934 | 3,080845 | 2,93140921 | 3,10824077 | 3,47634089 | 3,19574064 | 3,17076756 | 3,52182864 | 4,40475257 | 3,59930605 |
| 5,254889 | 5,044307 | 4,689062 | 4,493569 | 4,544902 | 4,112305 | 5,29495316 | 4,39397488 | 5,18951444 | 5,08639352 | 4,93607029 | 4,75001909 | 4,83980973 | 4,63996964 |
| 3,439573 | 3,300192 | 2,880187 | 3,072798 | 2,568083 | 2,486918 | 3,3410087  | 3,16116395 | 3,42359129 | 3,3878486  | 3,1824071  | 3,42401217 | 2,96188539 | 3,00007952 |
| 2,462266 | 2,661701 | 2,412832 | 1,466539 | 1,630886 | 1,779976 | 3,26288561 | 1,27739938 | 2,4728758  | 2,76604003 | 2,72931706 | 1,92488913 | 2,0715737  | 2,28682956 |
| 6,498828 | 6,363233 | 5,937402 | 5,931882 | 5,781255 | 5,105516 | 6,20750037 | 6,1778742  | 6,39960715 | 6,37085875 | 6,14630754 | 6,09239798 | 6,01431149 | 5,64204294 |
| 6,527477 | 6,250751 | 6,145337 | 5,614966 | 5,466643 | 5,139153 | 6,66274724 | 6,47902455 | 6,42747664 | 6,26131567 | 6,34789579 | 5,79661997 | 5,71543864 | 5,67598008 |
| 6,399222 | 6,024292 | 5,673922 | 5,187433 | 5,120469 | 4,774648 | 6,24884163 | 6,24626739 | 6,30271133 | 6,04077357 | 5,89086967 | 5,39760302 | 5,38658274 | 5,30822264 |
| 5,83393  | 5,637067 | 5,39838  | 5,123916 | 5,036064 | 4,451756 | 5,67065864 | 5,70733704 | 5,75280033 | 5,66366595 | 5,62373796 | 5,33832254 | 5,30640029 | 4,98244952 |
| 6,058605 | 5,955553 | 5,64985  | 5,686184 | 5,376605 | 5,037031 | 5,66626068 | 5,96557823 | 5,97136216 | 5,97383057 | 5,86753241 | 5,8630878  | 5,62990498 | 5,57294685 |
| 6,61359  | 6,620424 | 6,218962 | 6,011359 | 5,843664 | 5,420078 | 6,38414696 | 6,60855011 | 6,5112466  | 6,62132989 | 6,41927355 | 6,16657394 | 6,07359834 | 5,95941173 |
| 6,927637 | 6,860452 | 6,603154 | 6,516167 | 6,371729 | 6,159792 | 6,79089247 | 6,92866242 | 6,81674871 | 6,85508646 | 6,79173896 | 6,63771172 | 6,57524575 | 6,70572611 |
| 5,052101 | 5,007811 | 4,750169 | 4,733325 | 4,553418 | 4,179831 | 4,68335763 | 4,92097563 | 4,99224409 | 5,05085109 | 4,99531214 | 4,97378359 | 4,8478997  | 4,70809817 |
| 4,801513 | 4,636801 | 4,159166 | 3,992703 | 3,646222 | 3,54533  | 4,64181818 | 4,6311892  | 4,74847433 | 4,6895348  | 4,42234816 | 4,28256038 | 3,98608814 | 4,06793559 |
| 7,308566 | 7,430011 | 7,239058 | 7,369218 | 7,286433 | 6,880847 | 7,39144523 | 5,79031612 | 7,18731303 | 7,40976408 | 7,40823343 | 7,43386503 | 7,4441897  | 7,43321499 |
| 4,591593 | 4,522485 | 4,218942 | 4,433058 | 4,417113 | 3,965818 | 4,05714024 | 4,45418161 | 4,54426603 | 4,57820564 | 4,48029964 | 4,69354412 | 4,71841365 | 4,49217556 |
| 8,767589 | 8,539714 | 7,701116 | 7,817622 | 7,593616 | 6,900231 | 7,95615298 | 8,31265475 | 8,60663753 | 8,49047286 | 7,85618816 | 7,85236091 | 7,7360052  | 7,45277195 |
| 4,264514 | 4,327997 | 4,168975 | 4,037883 | 4,802569 | 3,873301 | 4,3713564  | 4,00480582 | 4,22608651 | 4,3887992  | 4,43185777 | 4,32472692 | 5,08458638 | 4,39883304 |
| 5,227151 | 5,126822 | 4,91995  | 4,99123  | 4,956084 | 4,430763 | 4,93994875 | 4,96362371 | 5,16253116 | 5,16675258 | 5,15991096 | 5,21448658 | 5,23042146 | 4,9612692  |
| 6,113592 | 6,223642 | 6,131034 | 6,265929 | 6,184295 | 5,75433  | 6,03736517 | 5,577765   | 6,02485302 | 6,23491497 | 6,33402936 | 6,40416436 | 6,39718854 | 6,29664622 |
| 7,786752 | 7,770563 | 7,712132 | 7,595126 | 7,643328 | 6,994164 | 7,65145398 | 7,62867741 | 7,65248808 | 7,74141816 | 7,86686792 | 7,64470518 | 7,78323025 | 7,5475431  |
| 6,434665 | 6,322018 | 5,8929   | 5,655804 | 5,2987   | 5,225532 | 6,28666084 | 6,43263234 | 6,33718996 | 6,33072061 | 6,10316386 | 5,83473412 | 5,55589735 | 5,76312982 |
| 7,128701 | 6,749968 | 6,539876 | 5,961269 | 5,996929 | 6,399298 | 7,09746512 | 7,14336646 | 7,01234196 | 6,74748917 | 6,73039238 | 6,11982489 | 6,21919593 | 6,94736919 |
| 5,776095 | 5,465296 | 4,904575 | 4,42382  | 4,532427 | 5,253543 | 5,06311496 | 5,84649588 | 5,69653896 | 5,49638296 | 5,14500524 | 4,68492228 | 4,82795882 | 5,79139076 |
| 4,050527 | 3,681887 | 3,212412 | 3,394502 | 2,756825 | 2,445285 | 3,37049798 | 3,570634   | 4,01792187 | 3,75957071 | 3,50449169 | 3,72425882 | 3,14118516 | 2,95807503 |
| 5,427928 | 5,313265 | 4,938731 | 5,216149 | 5,218472 | 4,81254  | 5,02779493 | 5,20835497 | 5,35784523 | 5,34832422 | 5,17811871 | 5,42440369 | 5,47968293 | 5,34645275 |
| 3,948511 | 3,787082 | 3,806557 | 3,498235 | 3,427953 | 3,144856 | 3,73913617 | 3,98894716 | 3,91868162 | 3,86201718 | 4,08050176 | 3,82107293 | 3,77873852 | 3,66388822 |
| 6,137318 | 5,89755  | 5,931585 | 5,140295 | 5,181735 | 5,456645 | 6,00345859 | 6,19236911 | 6,04793346 | 5,91734307 | 6,14066809 | 5,35360908 | 5,44478378 | 5,99630502 |
| 6,841423 | 6,624532 | 6,487142 | 5,683037 | 5,687954 | 6,045418 | 6,63512679 | 6,94452503 | 6,7328805  | 6,62533055 | 6,67926797 | 5,8601507  | 5,92567807 | 6,59033156 |
| 4,769868 | 4,669698 | 4,635729 | 4,754313 | 4,641629 | 4,287013 | 4,76432214 | 4,80482945 | 4,71769035 | 4,72157227 | 4,88436516 | 4,99337171 | 4,93169775 | 4,81623654 |
| 4,817302 | 4,870502 | 2,941732 | 4,34704  | 3,22681  | 3,203372 | 4,79652328 | 4,98604498 | 4,76383372 | 4,91712968 | 3,24207358 | 4,61326344 | 3,58765814 | 3,72292635 |
| 6,921368 | 7,007649 | 6,684654 | 6,616881 | 6,5982   | 6,351382 | 6,79516571 | 6,95009771 | 6,81065028 | 6,99843751 | 6,87075136 | 6,73170819 | 6,79038704 | 6,89902564 |
| 8,636906 | 8,309027 | 8,176472 | 8,332139 | 8,253955 | 7,985137 | 8,20805997 | 8,61266583 | 8,47951028 | 8,26581323 | 8,31703499 | 8,33256011 | 8,36330931 | 8,54735843 |
| 6,15346  | 4,224654 | 5,674489 | 5,940921 | 5,874468 | 5,397559 | 5,94211719 | 6,03326926 | 6,06363626 | 4,28815634 | 5,89141936 | 6,10083408 | 6,10286131 | 5,9366918  |
| 6,203603 | 5,905997 | 5,799844 | 5,185244 | 5,163498 | 5,170611 | 6,48436042 | 5,96241362 | 6,11241492 | 5,92556937 | 6,01294818 | 5,39556003 | 5,42745912 | 5,70771877 |
| 5,713566 | 5,636768 | 5,51754  | 5,452401 | 5,546539 | 5,070595 | 5,48801211 | 5,74975767 | 5,63571131 | 5,66337476 | 5,73926087 | 5,64489791 | 5,79133767 | 5,60681034 |
| 6,427814 | 6,277793 | 5,977683 | 5,967544 | 5,864496 | 5,488916 | 5,08192306 | 6,15829515 | 6,33052537 | 6,28765112 | 6,18535905 | 6,12568136 | 6,09338818 | 6,02886397 |



|          |          |          |          |          |          |            |            |            |            |            |            |            |            |
|----------|----------|----------|----------|----------|----------|------------|------------|------------|------------|------------|------------|------------|------------|
| 4,718864 | 4,642516 | 4,408274 | 4,349034 | 4,407725 | 3,836037 | 4,55911343 | 4,8852442  | 4,66807412 | 4,69510048 | 4,66385271 | 4,61512444 | 4,70949531 | 4,36123654 |
| 5,464163 | 5,587277 | 5,400295 | 5,395021 | 5,363531 | 5,082687 | 5,20628617 | 5,41872647 | 5,39309431 | 5,61517686 | 5,62559451 | 5,5913451  | 5,61748504 | 5,61901024 |
| 6,385059 | 6,213904 | 6,093626 | 5,34972  | 5,325366 | 5,773686 | 6,30465488 | 6,70743828 | 6,28893369 | 6,2254314  | 6,29776315 | 5,54906563 | 5,58122933 | 6,31617493 |
| 3,304725 | 3,328319 | 2,994752 | 2,991206 | 2,360522 | 2,183892 | 3,61619039 | 3,46779006 | 3,29241237 | 3,4152407  | 3,29347527 | 3,34786228 | 2,76470808 | 2,69434966 |
| 6,467529 | 6,205464 | 5,990368 | 5,706703 | 5,808519 | 5,611232 | 5,81660939 | 5,97885476 | 6,36915977 | 6,21721192 | 6,19765687 | 5,8822382  | 6,04021155 | 6,15227138 |
| 6,979809 | 6,916947 | 6,760791 | 6,031351 | 5,97046  | 6,6725   | 6,97360958 | 7,34871512 | 6,86750116 | 6,91010536 | 6,94456445 | 6,18523249 | 6,1940511  | 7,22300894 |
| 6,576074 | 6,286451 | 5,595393 | 5,443216 | 5,35499  | 4,48954  | 6,5006413  | 6,15583466 | 6,47475137 | 6,2960829  | 5,81473759 | 5,63632554 | 5,60937132 | 5,02057066 |
| 5,105748 | 4,941794 | 4,784233 | 3,242984 | 3,473656 | 4,657207 | 4,67211763 | 4,80026944 | 5,04443141 | 4,98655897 | 5,02833641 | 3,58284693 | 3,82215513 | 5,18973373 |
| 5,176515 | 5,090593 | 4,644554 | 4,573801 | 4,478517 | 4,094588 | 4,70544413 | 5,07730051 | 5,11327291 | 5,13147017 | 4,89292079 | 4,82489969 | 4,77674578 | 4,62209455 |
| 7,269984 | 6,772402 | 6,65564  | 6,84844  | 6,868366 | 6,454723 | 6,6849662  | 7,02576456 | 7,1497808  | 6,76933702 | 6,84262295 | 6,94782243 | 7,0470374  | 7,00328874 |
| 4,20332  | 4,069055 | 4,097935 | 4,232044 | 4,19163  | 3,560259 | 3,79073805 | 4,44288395 | 4,16655753 | 4,13662282 | 4,3629861  | 4,50593756 | 4,50421093 | 4,0829978  |
| 3,932533 | 3,859984 | 3,475842 | 4,10922  | 4,010792 | 4,290843 | 3,65084816 | 4,87701127 | 3,90313837 | 3,9330144  | 3,75988108 | 4,39130581 | 4,33241974 | 4,82010071 |
| 5,803903 | 5,663013 | 5,242038 | 5,255423 | 5,185562 | 4,81812  | 5,57860012 | 5,71054616 | 5,72359034 | 5,68893403 | 5,47216795 | 5,46105815 | 5,44841932 | 5,35208254 |
| 7,763038 | 7,168186 | 7,524454 | 7,244341 | 7,015363 | 6,225099 | 7,78487599 | 7,70848396 | 7,62941932 | 7,15478001 | 7,68491837 | 7,31731721 | 7,18668056 | 6,77161583 |
| 6,396369 | 6,399047 | 6,363856 | 6,43151  | 6,258631 | 5,805936 | 5,94418227 | 6,29948923 | 6,29993596 | 6,40573701 | 6,55974499 | 6,55870126 | 6,46780572 | 6,3487127  |
| 5,146901 | 5,107155 | 4,725467 | 4,832979 | 4,79995  | 4,278625 | 4,80497986 | 4,89777903 | 5,08446468 | 5,14759944 | 4,97136411 | 5,06679077 | 5,0820984  | 4,80777369 |
| 2,93833  | 2,812435 | 2,80136  | 2,30758  | 2,066152 | 2,085282 | 2,68723467 | 3,15883301 | 2,93598659 | 2,91283567 | 3,10598612 | 2,70983349 | 2,48506457 | 2,59485977 |
| 5,70803  | 5,667067 | 5,398479 | 5,137001 | 5,089195 | NA       | 5,43320625 | 5,52341972 | 5,63032594 | 5,69288211 | 5,62383394 | 5,35053479 | 5,35687329 | NA         |
| 4,305262 | 3,945778 | NA       | 3,113362 | 2,765455 | 2,701606 | 4,09291758 | 4,23628823 | 4,2657258  | 4,01656679 | NA         | 3,46187059 | 3,14938342 | 3,21668315 |
| 7,207725 | NA       | 6,646353 | 6,924979 | 6,855179 | 6,56826  | 7,0137346  | 7,03845861 | 7,0892158  | NA         | 6,83361941 | 7,01925635 | 7,03451011 | 7,11783882 |
| 6,594621 | 6,368626 | 6,152828 | 6,173253 | NA       | 6,010883 | 6,42926549 | 6,48286955 | 6,49279372 | 6,37611084 | 6,35515814 | 6,31766976 | NA         | 6,55548841 |
| 5,013413 | NA       | 4,767172 | 4,569    | 4,300517 | 4,298096 | 4,7356498  | 5,03056216 | 4,95460875 | NA         | 5,01179616 | 4,82041892 | 4,60765062 | 4,82741843 |
| 4,867887 | 4,65932  | 4,315471 | 4,433979 | 4,062919 | NA       | 4,26486262 | 4,6498436  | 4,81304236 | 4,71146543 | 4,57388231 | 4,69440369 | 4,38193897 | NA         |
| 5,180889 | 5,227851 | 4,7821   | 4,899864 | 4,351875 | 3,794439 | NA         | 4,95406659 | 5,1175279  | 5,2651419  | 5,02626851 | 5,1292146  | 4,65643932 | 4,31926736 |
| 7,313765 | 7,604277 | 7,410856 | 7,520947 | 7,383562 | 6,596231 | NA         | 6,94578494 | 7,19237057 | 7,57947687 | 7,57478769 | 7,57547385 | 7,53645961 | 7,1460594  |
| 6,980235 | 6,881732 | 6,319628 | 6,556508 | 6,556969 | 6,210245 | 6,44216548 | NA         | 6,86791557 | 6,87581046 | 6,51686695 | 6,67536202 | 6,75121872 | 6,75662929 |
| 4,352673 | 4,534001 | 4,537304 | 4,815818 | 4,805132 | 4,43568  | NA         | 4,71764342 | 4,31184679 | 4,58942075 | 4,78894436 | 5,05077439 | 5,08702116 | 4,96623007 |
| 4,877902 | 4,926103 | 4,75458  | 4,648732 | 4,932203 | 4,936642 | NA         | 5,1392547  | 4,82278486 | 4,97127795 | 4,9995885  | 4,89483287 | 5,20773516 | 5,4716621  |
| 7,957527 | 7,97215  | 7,706544 | 7,873426 | 7,999037 | 7,363875 | NA         | 8,31231554 | 7,81861647 | 7,93773812 | 7,86145048 | 7,90444283 | 8,12114414 | 7,92055299 |
| 6,108425 | 5,91133  | 6,008212 | 6,163538 | 6,208247 | 6,552058 | NA         | 6,36598562 | 6,01982661 | 5,93076303 | 6,21495622 | 6,30860274 | 6,41994229 | 7,10149225 |
| 5,946738 | 5,781365 | 5,63725  | 6,102424 | 6,170431 | 5,369392 | NA         | 6,35161433 | 5,86253895 | 5,80419374 | 5,855317   | 6,25156499 | 6,38401812 | 5,90827347 |
| 5,987819 | 6,5746   | 6,070693 | 6,143264 | 6,396052 | 5,694635 | NA         | 6,65161553 | 5,90250218 | 6,57670317 | 6,27553013 | 6,289681   | 6,59835194 | 6,23641857 |
| 4,299308 | 4,083647 | 4,088069 | 4,24835  | 4,249259 | 3,488365 | NA         | 4,11739477 | 4,2599338  | 4,15083356 | 4,35342124 | 4,52115597 | 4,55895691 | 4,0104623  |
| 4,819238 | 4,296342 | 4,373271 | 4,440774 | 4,478941 | 4,592363 | NA         | 5,2705208  | 4,76571705 | 4,35797128 | 4,62991809 | 4,70074547 | 4,77714857 | 5,12431114 |
| 4,667131 | 4,715221 | 4,494974 | 4,704805 | 4,894551 | 4,430841 | NA         | 4,98408688 | 4,61774872 | 4,76590585 | 4,74790639 | 4,94716585 | 5,17196678 | 4,9613479  |
| 4,990747 | 5,393015 | 5,236021 | 5,584118 | 5,778172 | 5,114898 | NA         | 5,53218866 | 4,93255947 | 5,42599051 | 5,4663346  | 5,76782951 | 6,01138272 | 5,65150865 |

|          |          |           |          |          |          |            |            |            |            |            |            |            |            |
|----------|----------|-----------|----------|----------|----------|------------|------------|------------|------------|------------|------------|------------|------------|
| 4,815328 | 4,532488 | 3,933519  | NA       | 4,197136 | 4,270458 | 4,31099726 | 4,46242048 | 4,76191343 | 4,58794728 | 4,20358853 | NA         | 4,50944148 | 4,79953382 |
| 5,240971 | 5,161019 | 5,168196  | 5,45322  | 5,525515 | 5,157916 | NA         | 5,25017333 | 5,17597513 | 5,20005608 | 5,40057981 | 5,64566228 | 5,77136544 | 5,6949105  |
| 6,028203 | 5,893238 | 5,595175  | 5,84313  | 5,943661 | 5,475627 | NA         | 5,77272484 | 5,94178737 | 5,91314374 | 5,81452624 | 6,00956565 | 6,16859278 | 6,01545639 |
| 4,559144 | 4,819354 | 4,957578  | 4,954365 | 5,017635 | 5,245505 | NA         | 5,37793562 | 4,51269993 | 4,86731808 | 5,19639045 | 5,18008044 | 5,28889324 | 5,78328104 |
| 5,423645 | 4,805754 | 8,193263  | 4,040845 | 6,253246 | 7,268504 | NA         | 10,5578802 | 5,35367876 | 4,85407341 | 8,33331349 | 4,32749135 | 6,46269012 | 7,82433101 |
| 8,249285 | 7,740883 | 6,692151  | 6,955727 | 5,977571 | 5,798266 | NA         | 8,17438398 | 8,10243604 | 7,71251364 | 6,87801953 | 7,04795349 | 6,20080636 | 6,34097426 |
| 8,45016  | 8,084904 | 8,053795  | 7,399362 | 7,189399 | 7,005836 | NA         | 6,46866638 | 8,29784544 | 8,04754609 | 8,19810243 | 7,46199845 | 7,35201003 | 7,55931925 |
| 3,66846  | 3,532298 | 3,180843  | 3,297147 | 3,336132 | 3,057619 | NA         | 3,65316014 | 3,64625052 | 3,61389015 | 3,47388626 | 3,63339731 | 3,69151107 | 3,57587281 |
| 4,486191 | 4,418462 | 4,285351  | 4,728237 | 4,676436 | 4,320913 | NA         | 5,29483391 | 4,44173191 | 4,47690054 | 4,54468165 | 4,96903496 | 4,96476346 | 4,85043902 |
| 4,594803 | 4,637649 | 4,593982  | 4,631207 | 4,737297 | 4,211466 | NA         | 4,78783549 | 4,54738869 | 4,69036065 | 4,84389239 | 4,87847677 | 5,02257975 | 4,74001544 |
| 4,064103 | 3,957915 | 3,911857  | 3,543482 | 3,647815 | 3,7381   | NA         | 4,77012454 | 4,03112848 | 4,02838667 | 4,18258771 | 3,863302   | 3,98760145 | 4,26242566 |
| 7,227295 | 5,302984 | 4,767333  | 5,192858 | 7,269023 | NA       | 6,7859966  | 6,74842396 | 7,10825332 | 5,33831184 | 5,01195224 | 5,40266618 | 7,42765067 | NA         |
| 4,409046 | 4,398996 | 4,245529  | 4,572105 | 4,482735 | 3,521104 | NA         | 4,0024017  | 4,36668594 | 4,45794315 | 4,50607513 | 4,82331682 | 4,78075277 | 4,04349343 |
| 4,821978 | 4,782563 | 4,075541  | 4,124946 | NA       | 3,652089 | 4,59387079 | 4,70391098 | 4,76838249 | 4,83148835 | 4,34127563 | 4,4059829  | NA         | 4,17564719 |
| 1,40874  | 1,645427 | 0,7595988 | NA       | 1,114096 | 1,160188 | 3,6177421  | 2,75598887 | 1,44801515 | 1,77631914 | 1,12654506 | NA         | 1,58063724 | 1,66151127 |
| 2,058681 | 2,407473 | 1,977636  | 1,928332 | 2,026881 | 1,466532 | 2,2126209  | NA         | 2,08027193 | 2,51845447 | 2,30740443 | 2,35588097 | 2,44775819 | 1,97058874 |
| 6,270946 | 6,477765 | 6,391506  | 6,559045 | 7,336961 | 5,432428 | 6,73905178 | NA         | 6,17792558 | 6,48239827 | 6,58655104 | 6,6777298  | 7,49218992 | 5,97187193 |
| 5,716262 | 5,548077 | 5,341522  | 5,568609 | 5,531323 | NA       | 5,23489759 | 5,34462017 | 5,63833396 | 5,57700107 | 5,56861542 | 5,75335494 | 5,77688288 | NA         |
| 3,628901 | 3,374952 | 2,797645  | 2,621007 | 2,213865 | NA       | 3,53356685 | 3,43027953 | 3,60776788 | 3,46065527 | 3,10238451 | 3,0023552  | 2,62538791 | NA         |
| 3,082138 | 3,012498 | 3,082946  | 3,463332 | 4,533181 | 2,565823 | 3,44067495 | NA         | 3,07588173 | 3,10767144 | 3,37897734 | 3,78849792 | 4,8286751  | 3,07968858 |
| 3,294148 | 3,237667 | 3,322631  | 3,481202 | NA       | 2,95815  | 1,3496859  | 3,45408927 | 3,28212316 | 3,32695724 | 3,6113465  | 3,80517601 | NA         | 3,47551626 |
| 2,584778 | 2,387434 | 2,698857  | NA       | 2,358105 | 3,955225 | 3,65963829 | 4,07921374 | 2,59205438 | 2,49893905 | 3,00661179 | NA         | 2,76241199 | 4,48148804 |
| 7,015908 | NA       | 5,870973  | 6,151759 | 5,76432  | 5,503472 | 7,6043071  | NA         | 6,90261794 | NA         | 6,08190613 | 6,29760939 | 5,9982237  | 6,04354985 |
| 4,646188 | NA       | 4,425945  | 4,891236 | 4,97752  | 4,019094 | NA         | 5,00226461 | 4,59737556 | NA         | 4,68098434 | 5,12116208 | 5,25078508 | 4,54592693 |
| NA       | 4,248934 | 4,201322  | 4,276985 | 4,265366 | 3,873003 | NA         | 4,31091175 | NA         | 4,31180196 | 4,46321745 | 4,54788104 | 4,57425812 | 4,39853238 |
| NA       | 5,204041 | 4,599273  | 4,806015 | 5,188612 | 4,809876 | NA         | NA         | NA         | 5,24195401 | 4,84902189 | 5,04162524 | 5,45131674 | 5,34376498 |
| 2,880686 | NA       | NA        | 2,513997 | 2,531541 | NA       | NA         | 2,82243384 | 2,87991103 | NA         | NA         | 2,90248267 | 2,92717148 | NA         |
| 4,774684 | NA       | 4,281067  | 3,965718 | NA       | NA       | NA         | 4,61532362 | 4,72237532 | NA         | 4,54052841 | 4,25737525 | NA         | NA         |
| 5,131544 | 4,995019 | NA        | NA       | NA       | NA       | 4,8537471  | 4,88694914 | 5,06952553 | 5,03839332 | NA         | NA         | NA         | NA         |
| 6,281001 | 5,363922 | NA        | NA       | NA       | NA       | 5,57825208 | 5,68644369 | 6,187707   | 5,39765765 | NA         | NA         | NA         | NA         |
| NA       | 4,418784 | NA        | 4,238003 | 3,782638 | 3,196566 | NA         | NA         | NA         | 4,47721413 | NA         | 4,5114991  | 4,11567964 | 3,71605962 |
| NA       | NA       | NA        | 4,167302 | 3,984353 | NA       | NA         | NA         | NA         | NA         | NA         | 4,44551379 | 4,30730341 | NA         |
| NA       | NA       | NA        | 4,026101 | 3,991747 | NA       | NA         | NA         | NA         | NA         | NA         | 4,31373077 | 4,31432751 | NA         |
| NA       | NA       | NA        | 4,104227 | 4,189185 | NA       | NA         | NA         | NA         | NA         | NA         | 4,38664584 | 4,50188824 | NA         |
| NA       | NA       | NA        | NA       | NA       | NA       | 6,90282932 | NA         |
